# Supplementary material
Source: publisher site journal article supplement (https://www.spandidos-publications.com/288/downloadSupplementary)
Supplement: Supplementary file 1 [file downloadSupplementary]

## Sheet: mRNA
ProbeName	pvalues	Foldchange	Type	PrimaryAccession	RefSeqAccession	GenbankAccession	EntrezGeneID	UniGeneID	GeneSymbol	GeneName	EnsemblID	TIGRID	GO_Avadis_	Description	GenomicCoordinates	Cytoband	Result_source	Sources	Chr	Start	End	Strand
LNCA_23_P31816	0.0496139	18.2077	mRNA	NM_005217	NM_005217	NM_005217	1668	Hs.654448	DEFA3	defensin, alpha 3, neutrophil-specific	ENST00000535841	THC2468638	GO:0050832|GO:0031640|GO:0005576|GO:0009615|GO:0005615|GO:0042742	Homo sapiens defensin, alpha 3, neutrophil-specific (DEFA3), mRNA [NM_005217]	chr8:6873570-6873511	hs|8p23.1	Agilent_HUMAN_G3V2	NM_005217	chr8	6873511	6873570	-
LNCA_23_P67646	0.00275784	14.2767	mRNA	NM_014364	NM_014364	NM_014364	26330	Hs.248017	GAPDHS	glyceraldehyde-3-phosphate dehydrogenase, spermatogenic	ENST00000222286	NP107934	GO:0050661|GO:0005515|GO:0005975|GO:0006094|GO:0007286|GO:0004365|GO:0030317|GO:0006096|GO:0005829|GO:0005737|GO:0051287|GO:0016491|GO:0006006|GO:0009434|GO:0045821	Homo sapiens glyceraldehyde-3-phosphate dehydrogenase, spermatogenic (GAPDHS), mRNA [NM_014364]	chr19:36029273-36029505	hs|19q13.12	Agilent_HUMAN_G3V2	NM_014364	chr19	36029273	36029505	+
LNCA_32_P4199	0.0321604	11.7787	mRNA	NM_173557	NM_173557	NM_173557	220441	Hs.667457	RNF152	ring finger protein 152	ENST00000312828	THC2620887	GO:0004842|GO:0016020|GO:0016874|GO:0006915|GO:0008270|GO:0016021|GO:0070936|GO:0005765|GO:0005764|GO:0046872	Homo sapiens ring finger protein 152 (RNF152), mRNA [NM_173557]	chr18:59482758-59482699	hs|18q21.33	Agilent_HUMAN_G3V2	NM_173557	chr18	59482699	59482758	-
LNCA_32_P87013	0.0296872	11.6152	mRNA	NM_000584	NM_000584	NM_000584	3576	Hs.624	IL8	interleukin 8	ENST00000307407	THC2470330	GO:0005515|GO:0005153|GO:0008285|GO:0019722|GO:0002237|GO:0006928|GO:0005615|GO:0030155|GO:0005622|GO:0035556|GO:0045091|GO:0006955|GO:0006954|GO:0006935|GO:0007050|GO:0030097|GO:0008009|GO:0030593|GO:0005576|GO:0001525|GO:0048566|GO:0050930|GO:0007165|GO:0071222|GO:0007186|GO:0090023|GO:0042119	Homo sapiens interleukin 8 (IL8), mRNA [NM_000584]	chr4:74609265-74609324	hs|4q13.3	Agilent_HUMAN_G3V2	NM_000584	chr4	74609265	74609324	+
LNCA_33_P3300733	0.0276633	11.599	mRNA	DB514319	NA	DB514319	NA	Hs.631783	NA	NA	NA	THC2762623	NA	DB514319 RIKEN full-length enriched human cDNA library, testis Homo sapiens cDNA clone H013040M09 3', mRNA sequence [DB514319]	chr13:37368939-37368998	hs|13q13.3	Agilent_HUMAN_G3V2	DB514319	chr13	37368939	37368998	+
LNCA_23_P122924	0.0285718	11.2197	mRNA	NM_002192	NM_002192	NM_002192	3624	Hs.583348	INHBA	inhibin, beta A	ENST00000442711	THC2641176	GO:0005515|GO:0042541|GO:0030308|GO:0042701|GO:0030154|GO:0042802|GO:0071397|GO:0045077|GO:0001942|GO:0046982|GO:0046882|GO:0006952|GO:0046881|GO:0046880|GO:0045786|GO:0032925|GO:0005125|GO:0045650|GO:0005179|GO:0045648|GO:0045893|GO:0040007|GO:0008083|GO:0060279|GO:0045578|GO:0008285|GO:0007267|GO:0071372|GO:0000082|GO:0001541|GO:0002244|GO:0045944|GO:0061029|GO:0042476|GO:0060021|GO:0007050|GO:…	Homo sapiens inhibin, beta A (INHBA), mRNA [NM_002192]	chr7:41729305-41729246	hs|7p14.1	Agilent_HUMAN_G3V2	NM_002192	chr7	41729246	41729305	-
LNCA_21_P0003022	0.012658	10.4849	mRNA	THC2725968	NA	NA	NA	NA	XLOC_002791	NA	NA	THC2725968	NA	Q98JH0_RHILO (Q98JH0) ATP-binding protein of ABC transporter, partial (4%) [THC2725968]	chr3:124782739-124782798	hs|3q21.2	Agilent_HUMAN_G3V2	THC2725968	chr3	124782739	124782798	+
LNCA_21_P0003368	0.000867569	9.26442	mRNA	ENST00000511330	NA	DA725066	NA	Hs.691061	XLOC_003547	NA	ENST00000511330	NA	NA	DA725066 NT2RI3 Homo sapiens cDNA clone NT2RI3006635 5', mRNA sequence [DA725066]	chr4:58022519-58022578	hs|4q12	Agilent_HUMAN_G3V2	ENST00000511330	chr4	58022519	58022578	+
LNCA_23_P207058	0.00168444	9.18664	mRNA	NM_003955	NM_003955	NM_003955	9021	Hs.527973	SOCS3	suppressor of cytokine signaling 3	ENST00000330871	THC2461868	GO:0014070|GO:0060674|GO:0009408|GO:0060670|GO:0019221|GO:0031100|GO:0045597|GO:0032094|GO:0005829|GO:0060334|GO:0009617|GO:0005737|GO:0060337|GO:0060338|GO:0032496|GO:0034097|GO:0010332|GO:0032355|GO:0060333|GO:0001666|GO:0032868|GO:0060708|GO:0042493|GO:0046627|GO:0060707|GO:0007568|GO:0006916|GO:0051384|GO:0007259|GO:0032570|GO:0004860|GO:0001932|GO:0040008	Homo sapiens suppressor of cytokine signaling 3 (SOCS3), mRNA [NM_003955]	chr17:76353186-76353127	hs|17q25.3	Agilent_HUMAN_G3V2	NM_003955	chr17	76353127	76353186	-
LNCA_23_P214080	0.0428335	8.81028	mRNA	NM_001964	NM_001964	NM_001964	1958	Hs.326035	EGR1	early growth response 1	ENST00000239938	THC2565476	GO:0005515|GO:0003700|GO:0006366|GO:0044212|GO:0072110|GO:0000982|GO:0019221|GO:0005634|GO:0071480|GO:0046872|GO:0005622|GO:0005737|GO:0072303|GO:0060337|GO:0003690|GO:0045944|GO:0048169|GO:0007611|GO:0033233|GO:0090090|GO:0070498|GO:0035035|GO:0032868|GO:0000122|GO:0030509|GO:0003677|GO:0009749|GO:0043565|GO:0030217|GO:0071504|GO:0071506|GO:0008270|GO:0005654|GO:0045893	Homo sapiens early growth response 1 (EGR1), mRNA [NM_001964]	chr5:137804891-137804950	hs|5q31.2	Agilent_HUMAN_G3V2	NM_001964	chr5	137804891	137804950	+
LNCA_23_P206760	0.0115484	8.11603	mRNA	NM_005143	NM_005143	NM_005143	3240	Hs.513711	HP	haptoglobin	ENST00000357763	THC2605331	GO:0006879|GO:2000296|GO:0042542|GO:0031838|GO:0030492|GO:0051354|GO:0004252|GO:0006508|GO:0006952|GO:0005576|GO:0003824|GO:0010942	Homo sapiens haptoglobin (HP), transcript variant 1, mRNA [NM_005143]	chr16:72094877-72094936	hs|16q22.2	Agilent_HUMAN_G3V2	NM_005143	chr16	72094877	72094936	+
LNCA_23_P356494	0.0158309	7.53509	mRNA	NM_006846	NM_006846	NM_006846	11005	Hs.331555	SPINK5	serine peptidase inhibitor, Kazal type 5	ENST00000359874	THC2485059	GO:0035315|GO:0048471|GO:0042640|GO:0004867|GO:0005783|GO:0005576|GO:0030414|GO:0005829|GO:0009913|GO:0005737|GO:0050777|GO:0030198|GO:0042599|GO:0016525|GO:0030855|GO:0045580|GO:0005789|GO:0005938	Homo sapiens serine peptidase inhibitor, Kazal type 5 (SPINK5), transcript variant 2, mRNA [NM_006846]	chr5:147516758-147516817	hs|5q32	Agilent_HUMAN_G3V2	NM_006846	chr5	147516758	147516817	+
LNCA_23_P7144	0.0260517	7.27803	mRNA	NM_001511	NM_001511	NM_001511	2919	Hs.789	CXCL1	chemokine (C-X-C motif) ligand 1 (melanoma growth stimulating activity, alpha)	ENST00000395761	THC2462921	GO:0008009|GO:0030036|GO:0008285|GO:0008283|GO:0005102|GO:0005576|GO:0043085|GO:0005615|GO:0007399|GO:0035556|GO:0005622|GO:0007165|GO:0006955|GO:0006954|GO:0006935|GO:0007186|GO:0008047|GO:0008083	Homo sapiens chemokine (C-X-C motif) ligand 1 (melanoma growth stimulating activity, alpha) (CXCL1), mRNA [NM_001511]	chr4:74736850-74736909	hs|4q13.3	Agilent_HUMAN_G3V2	NM_001511	chr4	74736850	74736909	+
LNCA_33_P3514487	0.00978878	7.19272	mRNA	NM_198481	NM_198481	NM_198481	284415	Hs.444431	VSTM1	V-set and transmembrane domain containing 1	ENST00000376626	NP1474893	GO:0016020|GO:0016021	Homo sapiens V-set and transmembrane domain containing 1 (VSTM1), mRNA [NM_198481]	chr19:54544173-54544114	hs|19q13.42	Agilent_HUMAN_G3V2	NM_198481	chr19	54544114	54544173	-
LNCA_23_P42855	0.000191902	7.15926	mRNA	NM_152706	NM_152706	NM_152706	219557	Hs.112877	C7orf62	chromosome 7 open reading frame 62	ENST00000297203	THC2477612	NA	Homo sapiens chromosome 7 open reading frame 62 (C7orf62), mRNA [NM_152706]	chr7:88423569-88423510	hs|7q21.13	Agilent_HUMAN_G3V2	NM_152706	chr7	88423510	88423569	-
LNCA_33_P3232203	0.00343783	7.13156	mRNA	ENST00000478615	NA	BX641043	6295	NA	SAG	S-antigen; retina and pineal gland (arrestin)	ENST00000478615	THC2486341	GO:0051219|GO:0007165|GO:0004864|GO:0002046|GO:0007601|GO:0050896|GO:0007166|GO:0016056|GO:0009586	S-antigen; retina and pineal gland (arrestin) [Source:HGNC Symbol;Acc:10521] [ENST00000478615]	chr2:234217865-234217924	hs|2q37.1	Agilent_HUMAN_G3V2	ENST00000478615	chr2	234217865	234217924	+
LNCA_33_P3462975	0.0043369	7.01626	mRNA	BC022036	NA	BC022036	401497	Hs.680131	LOC401497	uncharacterized LOC401497	NA	THC2639724	NA	Homo sapiens cDNA clone IMAGE:4826624. [BC022036]	chr9:30388993-30388934	hs|9p21.1	Agilent_HUMAN_G3V2	BC022036	chr9	30388934	30388993	-
LNCA_21_P0002814	0.0033553	6.77147	mRNA	DA230376	NA	DA230376	NA	Hs.581641	XLOC_002943	NA	NA	NA	NA	DA230376 BRAWH3 Homo sapiens cDNA clone BRAWH3025255 5', mRNA sequence [DA230376]	chr3:182205889-182205948	hs|3q26.33	Agilent_HUMAN_G3V2	DA230376	chr3	182205889	182205948	+
LNCA_23_P25813	0.00433312	6.72263	mRNA	NM_006683	NM_006683	NM_006683	10876	Hs.304757	EDDM3A	epididymal protein 3A	ENST00000326842	THC2479961	GO:0007321|GO:0005576|GO:0005615	Homo sapiens epididymal protein 3A (EDDM3A), mRNA [NM_006683]	chr14:21216275-21216334	hs|14q11.2	Agilent_HUMAN_G3V2	NM_006683	chr14	21216275	21216334	+
LNCA_33_P3289236	0.00381332	6.61686	mRNA	NM_020995	NM_020995	NM_020995	3250	Hs.655361	HPR	haptoglobin-related protein	ENST00000356967	THC2558421	GO:0030492|GO:0004252|GO:0034366|GO:0006508|GO:0005576|GO:0003824	Homo sapiens haptoglobin-related protein (HPR), mRNA [NM_020995]	chr16:72110884-72110943	hs|16q22.2	Agilent_HUMAN_G3V2	NM_020995	chr16	72110884	72110943	+
LNCA_32_P89899	0.0287816	6.43889	mRNA	NM_173536	NM_173536	NM_173536	2565	Hs.375051	GABRG1	gamma-aminobutyric acid (GABA) A receptor, gamma 1	ENST00000295452	THC2601113	GO:0005230|GO:0030054|GO:0005886|GO:0004890|GO:0034707|GO:0007268|GO:0045202|GO:0007214|GO:0005254|GO:0045211|GO:0016021|GO:0005216|GO:0006811	Homo sapiens gamma-aminobutyric acid (GABA) A receptor, gamma 1 (GABRG1), mRNA [NM_173536]	chr4:46038185-46038126	hs|4p12	Agilent_HUMAN_G3V2	NM_173536	chr4	46038126	46038185	-
LNCA_21_P0014280	0.00932536	6.18784	mRNA	XM_003119544	XM_003119544	XM_003119544	NA	Hs.449723	LOC100508384	uncharacterized LOC100508384	NA	THC2479151	NA	PREDICTED: Homo sapiens hypothetical protein LOC100508384 (LOC100508384), mRNA [XM_003119544]	chr12:129329103-129329044	hs|12q24.33	Agilent_HUMAN_G3V2	XM_003119544	chr12	129329044	129329103	-
LNCA_23_P166408	0.0398312	6.10065	mRNA	NM_020530	NM_020530	NM_020530	5008	Hs.248156	OSM	oncostatin M	ENST00000215781	THC2474967	GO:0042506|GO:0008284|GO:0008285|GO:0042503|GO:0009408|GO:0008283|GO:0042508|GO:0050731|GO:0005615|GO:0046888|GO:0006955|GO:0033138|GO:0002675|GO:0045944|GO:0051781|GO:0005147|GO:0006915|GO:0007275|GO:0005576|GO:0005125|GO:0007422|GO:0005900|GO:0043410|GO:0008083|GO:0045835|GO:0048266|GO:0040008	Homo sapiens oncostatin M (OSM), mRNA [NM_020530]	chr22:30659028-30658969	hs|22q12.2	Agilent_HUMAN_G3V2	NM_020530	chr22	30658969	30659028	-
LNCA_33_P3243230	0.0205564	5.97505	mRNA	ENST00000401931	NA	NA	3576	NA	IL8	interleukin 8	ENST00000401931	THC2544321	GO:0005515|GO:0005153|GO:0008285|GO:0019722|GO:0002237|GO:0006928|GO:0005615|GO:0030155|GO:0005622|GO:0035556|GO:0045091|GO:0006955|GO:0006954|GO:0006935|GO:0007050|GO:0030097|GO:0008009|GO:0030593|GO:0005576|GO:0001525|GO:0048566|GO:0050930|GO:0007165|GO:0071222|GO:0007186|GO:0090023|GO:0042119	interleukin 8 [Source:HGNC Symbol;Acc:6025] [ENST00000401931]	chr4:74607982-74608041	hs|4q13.3	Agilent_HUMAN_G3V2	ENST00000401931	chr4	74607982	74608041	+
LNCA_33_P3380642	0.0305074	5.94849	mRNA	ENST00000264899	NA	AK027833	80144	Hs.369448	FRAS1	Fraser syndrome 1	ENST00000264899	NP709473	GO:0007154|GO:0005886|GO:0016021|GO:0046872	Fraser syndrome 1 [Source:HGNC Symbol;Acc:19185] [ENST00000264899]	chr4:79240531-79240590	hs|4q21.21	Agilent_HUMAN_G3V2	ENST00000264899	chr4	79240531	79240590	+
LNCA_23_P36050	0.00623511	5.87931	mRNA	NM_001005202	NM_001005202	NM_001005202	219473	Hs.553629	OR8K3	olfactory receptor, family 8, subfamily K, member 3	ENST00000312711	NP1461822	GO:0004984|GO:0005886|GO:0004930|GO:0004872|GO:0016021|GO:0004871|GO:0050896	Homo sapiens olfactory receptor, family 8, subfamily K, member 3 (OR8K3), mRNA [NM_001005202]	chr11:56086247-56086306	hs|11q12.1	Agilent_HUMAN_G3V2	NM_001005202	chr11	56086247	56086306	+
LNCA_33_P3322259	0.0430456	5.83217	mRNA	NM_022573	NM_022573	NM_022573	64591	Hs.646249	TSPY2	testis specific protein, Y-linked 2	ENST00000537415	NP096549	GO:0007506|GO:0005737|GO:0006334|GO:0007275|GO:0005634|GO:0007283|GO:0030154	Homo sapiens testis specific protein, Y-linked 2 (TSPY2), mRNA [NM_022573]	chrY:6115413-6115472	hs|Yp11.2	Agilent_HUMAN_G3V2	NM_022573	chrY	6115413	6115472	+
LNCA_23_P18372	0.0257812	5.62215	mRNA	NM_032047	NM_032047	NM_032047	84002	Hs.718506	B3GNT5	UDP-GlcNAc:betaGal beta-1,3-N-acetylglucosaminyltransferase 5	ENST00000326505	THC2462855	GO:0009247|GO:0005794|GO:0016757|GO:0007275|GO:0008457|GO:0007417|GO:0008378|GO:0005622|GO:0000139|GO:0016020|GO:0006486|GO:0016021|GO:0008917	Homo sapiens UDP-GlcNAc:betaGal beta-1,3-N-acetylglucosaminyltransferase 5 (B3GNT5), mRNA [NM_032047]	chr3:182990933-182990992	hs|3q27.1	Agilent_HUMAN_G3V2	NM_032047	chr3	182990933	182990992	+
LNCA_23_P66967	0.031197	5.54008	mRNA	NM_004066	NM_004066	NM_004066	1068	Hs.122511	CETN1	centrin, EF-hand protein, 1	ENST00000327228	THC2474782	GO:0008026|GO:0005813|GO:0005814|GO:0005509|GO:0003676|GO:0031683|GO:0005524|GO:0034605|GO:0000922|GO:0005737|GO:0007049|GO:0007067|GO:0032391|GO:0005856|GO:0051301	Homo sapiens centrin, EF-hand protein, 1 (CETN1), mRNA [NM_004066]	chr18:581466-581525	hs|18p11.32	Agilent_HUMAN_G3V2	NM_004066	chr18	581466	581525	+
LNCA_21_P0012005	0.00865633	5.44273	mRNA	ENST00000427579	NA	DA046613	NA	Hs.580507	XLOC_l2_007359	NA	ENST00000427579	NA	NA	DA046613 BLADE2 Homo sapiens cDNA clone BLADE2009437 5', mRNA sequence [DA046613]	chr2:67268185-67269098	hs|2p14	Agilent_HUMAN_G3V2	ENST00000427579	chr2	67268185	67269098	+
LNCA_23_P127948	0.0155937	5.40526	mRNA	NM_001124	NM_001124	NM_001124	133	Hs.441047	ADM	adrenomedullin	ENST00000528655	THC2591417	GO:0008284|GO:0031700|GO:0008285|GO:0006701|GO:0060712|GO:0031102|GO:0008015|GO:0060670|GO:0031100|GO:0009409|GO:0007267|GO:0007204|GO:0005615|GO:0055074|GO:0007507|GO:0005737|GO:0048589|GO:0042594|GO:0045906|GO:0045909|GO:0032496|GO:0042475|GO:0006171|GO:0032868|GO:0001666|GO:0007565|GO:0010033|GO:0008209|GO:0007568|GO:0005102|GO:0009611|GO:0001843|GO:0051384|GO:0005625|GO:0005576|GO:0045768|GO:…	Homo sapiens adrenomedullin (ADM), mRNA [NM_001124]	chr11:10328780-10328839	hs|11p15.4	Agilent_HUMAN_G3V2	NM_001124	chr11	10328780	10328839	+
LNCA_33_P3232193	0.0405012	5.28931	mRNA	ENST00000394156	NA	D21255	1009	Hs.116471	CDH11	cadherin 11, type 2, OB-cadherin (osteoblast)	ENST00000394156	THC2485939	GO:0016337|GO:0005737|GO:0001501|GO:0005886|GO:0001503|GO:0034329|GO:0005509|GO:0016021|GO:0007155|GO:0007156|GO:0045216|GO:0034332	cadherin 11, type 2, OB-cadherin (osteoblast) [Source:HGNC Symbol;Acc:1750] [ENST00000394156]	chr16:64982572-64982513	hs|16q21	Agilent_HUMAN_G3V2	ENST00000394156	chr16	64982513	64982572	-
LNCA_21_P0008306	0.000353708	5.27152	mRNA	BX105435	NA	BX105435	NA	Hs.569381	XLOC_010778	NA	NA	THC2782703	NA	BX105435 Soares_testis_NHT Homo sapiens cDNA clone IMAGp998C144462, mRNA sequence [BX105435]	chr14:27281548-27286128	hs|14q12	Agilent_HUMAN_G3V2	BX105435	chr14	27281548	27286128	+
LNCA_33_P3350658	0.00695044	5.13382	mRNA	NM_177398	NM_177398	NM_177398	4009	Hs.667312	LMX1A	LIM homeobox transcription factor 1, alpha	ENST00000367893	THC2479622	GO:0043565|GO:0021542|GO:0003700|GO:0045665|GO:0007411|GO:0021953|GO:0021549|GO:0008270|GO:0007275|GO:0005634|GO:0001558|GO:0046872	Homo sapiens LIM homeobox transcription factor 1, alpha (LMX1A), transcript variant 1, mRNA [NM_177398]	chr1:165173170-165173111	hs|1q23.3	Agilent_HUMAN_G3V2	NM_177398	chr1	165173111	165173170	-
LNCA_19_P00320251	0.0214533	5.10436	mRNA	NR_038308	NR_038308	NR_038308	NA	NA	LOC100505702	NA	NA	THC2518606	NA	Homo sapiens uncharacterized LOC100505702 (LOC100505702), transcript variant 6, non-coding RNA [NR_038308]	chr4:79567232-79567291	hs|4q21.21	Agilent_HUMAN_G3V2	NR_038308	chr4	79567232	79567291	+
LNCA_23_P108734	0.00178376	5.07538	mRNA	NM_018436	NM_018436	NM_018436	55821	Hs.97899	ALLC	allantoicase	ENST00000471711	THC2478338	GO:0016787|GO:0004037	Homo sapiens allantoicase (ALLC), transcript variant 1, mRNA [NM_018436]	chr2:3744966-3745025	hs|2p25.3	Agilent_HUMAN_G3V2	NM_018436	chr2	3744966	3745025	+
LNCA_23_P133036	0.0490529	5.06215	mRNA	NM_006424	NM_006424	NM_006424	10568	Hs.479372	SLC34A2	solute carrier family 34 (sodium phosphate), member 2	ENST00000382051	NP1164663	GO:0043627|GO:0005886|GO:0007568|GO:0031526|GO:0031402|GO:0055085|GO:0001701|GO:0044341|GO:0005436|GO:0016324|GO:0015321|GO:0030643|GO:0005887|GO:0042301|GO:0009750|GO:0006817|GO:0016021|GO:0006814|GO:0032355|GO:0006811|GO:0015293	Homo sapiens solute carrier family 34 (sodium phosphate), member 2 (SLC34A2), transcript variant 1, mRNA [NM_006424]	chr4:25679941-25680000	hs|4p15.2	Agilent_HUMAN_G3V2	NM_006424	chr4	25679941	25680000	+
LNCA_23_P113393	0.0130922	5.04088	mRNA	NM_017413	NM_017413	NM_017413	8862	Hs.303084	APLN	apelin	ENST00000307484	THC2613808	GO:0048471|GO:0008284|GO:0005102|GO:0005576|GO:0045776|GO:0005615|GO:0007165|GO:0006955|GO:0043576|GO:0005179|GO:0007595|GO:0045906|GO:0002026|GO:0042756|GO:0045909|GO:0051461|GO:0031652|GO:0051466|GO:0050878|GO:0042327	Homo sapiens apelin (APLN), mRNA [NM_017413]	chrX:128779470-128779411	hs|Xq26.1	Agilent_HUMAN_G3V2	NM_017413	chrX	128779411	128779470	-
LNCA_21_P0001126	0.0124574	5.02539	mRNA	BC021746	NA	BC021746	NA	Hs.638707	XLOC_000818	NA	NA	THC2615778	NA	Q7D6H2_MYCTU (Q7D6H2) DHH family protein, partial (5%) [THC2615778]	chr1:46913180-46912815	hs|1p33	Agilent_HUMAN_G3V2	BC021746	chr1	46912815	46913180	-
LNCA_21_P0004216	0.019814	4.99829	mRNA	NR_026994	NR_026994	NR_026994	NA	Hs.665092	LOC340094	uncharacterized LOC340094	ENST00000509382	THC2721529	NA	Homo sapiens uncharacterized LOC340094 (LOC340094), non-coding RNA [NR_026994]	chr5:5034605-5038796	hs|5p15.32	Agilent_HUMAN_G3V2	NR_026994	chr5	5034605	5038796	+
LNCA_24_P213120	0.00134476	4.99086	mRNA	NM_001136486	NM_001136486	NM_001136486	120146	Hs.454490	TRIM64	tripartite motif containing 64	ENST00000329862	THC2505602	GO:0005622|GO:0008270|GO:0046872	Homo sapiens tripartite motif containing 64 (TRIM64), mRNA [NM_001136486]	chr11:89706584-89706643	hs|11q14.3	Agilent_HUMAN_G3V2	NM_001136486	chr11	89706584	89706643	+
LNCA_23_P4494	0.0369981	4.90511	mRNA	NM_024422	NM_024422	NM_024422	1824	Hs.95612	DSC2	desmocollin 2	ENST00000399347	THC2462770	GO:0030057|GO:0030054|GO:0005913|GO:0005886|GO:0005509|GO:0016021|GO:0007155|GO:0007156	Homo sapiens desmocollin 2 (DSC2), transcript variant Dsc2a, mRNA [NM_024422]	chr18:28651609-28650796	hs|18q12.1	Agilent_HUMAN_G3V2	NM_024422	chr18	28650796	28651609	-
LNCA_33_P3237215	0.00315035	4.80854	mRNA	NM_033506	NM_033506	NM_033506	26261	Hs.283764	FBXO24	F-box protein 24	ENST00000488079	THC2477176	GO:0004842|GO:0016567|GO:0000151	Homo sapiens F-box protein 24 (FBXO24), transcript variant 1, mRNA [NM_033506]	chr7:100193238-100193297	hs|7q22.1	Agilent_HUMAN_G3V2	NM_033506	chr7	100193238	100193297	+
LNCA_23_P19333	0.00656208	4.7509	mRNA	NM_018643	NM_018643	NM_018643	54210	Hs.283022	TREM1	triggering receptor expressed on myeloid cells 1	ENST00000244709	THC2607036	GO:0035556|GO:0005622|GO:0005886|GO:0007596|GO:0006959|GO:0005576|GO:0004872|GO:0016021|GO:0050900	Homo sapiens triggering receptor expressed on myeloid cells 1 (TREM1), transcript variant 1, mRNA [NM_018643]	chr6:41248727-41243938	hs|6p21.1	Agilent_HUMAN_G3V2	NM_018643	chr6	41243938	41248727	-
LNCA_23_P90888	0.00416326	4.60678	mRNA	NM_001039523	NM_001039523	NM_001039523	1134	Hs.434479	CHRNA1	cholinergic receptor, nicotinic, alpha 1 (muscle)	ENST00000435083	THC2484899	GO:0048630|GO:0005230|GO:0030054|GO:0031594|GO:0005886|GO:0007268|GO:0019228|GO:0046716|GO:0050905|GO:0050881|GO:0007528|GO:0015464|GO:0045211|GO:0042391|GO:0006810|GO:0042166|GO:0004872|GO:0006811|GO:0009986|GO:0007274|GO:0005892|GO:0007165|GO:0003009|GO:0016021|GO:0070050|GO:0005216|GO:0004889	Homo sapiens cholinergic receptor, nicotinic, alpha 1 (muscle) (CHRNA1), transcript variant 1, mRNA [NM_001039523]	chr2:175614896-175614837	hs|2q31.1	Agilent_HUMAN_G3V2	NM_001039523	chr2	175614837	175614896	-
LNCA_21_P0010822	0.00101636	4.52799	mRNA	NR_024524	NR_024524	NR_024524	NA	Hs.148265	LOC100129055	cyclin Y-like pseudogene	ENST00000423162	THC2606126	NA	Homo sapiens cyclin Y-like pseudogene (LOC100129055), non-coding RNA [NR_024524]	chr10:38466867-38484558	hs|10p11.1	Agilent_HUMAN_G3V2	NR_024524	chr10	38466867	38484558	+
LNCA_33_P3391039	0.00250708	4.48655	mRNA	NM_214711	NM_214711	NM_214711	401137	Hs.518795	C4orf40	chromosome 4 open reading frame 40	ENST00000502294	THC2473089	GO:0005576	Homo sapiens chromosome 4 open reading frame 40 (C4orf40), mRNA [NM_214711]	chr4:71024217-71024276	hs|4q13.3	Agilent_HUMAN_G3V2	NM_214711	chr4	71024217	71024276	+
LNCA_21_P0004775	0.00655172	4.48279	mRNA	ENST00000446358	NA	BG207696	NA	Hs.586237	XLOC_005812	NA	ENST00000446358	NA	NA	RST27179 Athersys RAGE Library Homo sapiens cDNA, mRNA sequence [BG207696]	chr6:114802667-114802608	hs|6q22.1	Agilent_HUMAN_G3V2	ENST00000446358	chr6	114802608	114802667	-
LNCA_21_P0009620	0.00506916	4.45123	mRNA	THC2540286	NA	NA	NA	NA	XLOC_012765	NA	NA	THC2540286	NA	ALU8_HUMAN (P39195) Alu subfamily SX sequence contamination warning entry, partial (10%) [THC2540286]	chr18:010627611-010627552	hs|18p11.22	Agilent_HUMAN_G3V2	THC2540286	chr18	10627552	10627611	-
LNCA_24_P85258	0.00213802	4.42619	mRNA	NM_001080484	NM_001080484	NM_001080484	85452	Hs.232092	KIAA1751	KIAA1751	ENST00000270720	THC2492079	NA	Homo sapiens KIAA1751 (KIAA1751), mRNA [NM_001080484]	chr1:1885099-1885040	hs|1p36.33	Agilent_HUMAN_G3V2	NM_001080484	chr1	1885040	1885099	-
LNCA_23_P165921	0.026818	4.40993	mRNA	NR_028295	NR_028295	NR_028295	100144596	Hs.187773	LINC00029	long intergenic non-protein coding RNA 29	ENST00000370341	THC2484302	NA	Homo sapiens long intergenic non-protein coding RNA 29 (LINC00029), non-coding RNA [NR_028295]	chr20:61665681-61665622	hs|20q13.33	Agilent_HUMAN_G3V2	NR_028295	chr20	61665622	61665681	-
LNCA_24_P348265	0.00529726	4.40551	mRNA	NM_133271	NM_133271	NM_133271	2204	Hs.659872	FCAR	Fc fragment of IgA, receptor for	ENST00000471750	NP088350	GO:0006955|GO:0019862|GO:0005886|GO:0005887|GO:0005576|GO:0004872	Homo sapiens Fc fragment of IgA, receptor for (FCAR), transcript variant 3, mRNA [NM_133271]	chr19:55396800-55396859	hs|19q13.42	Agilent_HUMAN_G3V2	NM_133271	chr19	55396800	55396859	+
LNCA_33_P3404879	0.00330892	4.39711	mRNA	NM_012302	NM_012302	NM_012302	23266	Hs.24212	LPHN2	latrophilin 2	ENST00000464775	NP1249051	GO:0007186|GO:0005886|GO:0007218|GO:0004930|GO:0016524|GO:0005529|GO:0004872|GO:0016021|GO:0004871	Homo sapiens latrophilin 2 (LPHN2), mRNA [NM_012302]	chr1:82447600-82447659	hs|1p31.1	Agilent_HUMAN_G3V2	NM_012302	chr1	82447600	82447659	+
LNCA_33_P3404480	0.0104966	4.39603	mRNA	NM_033066	NM_033066	NM_033066	58538	Hs.63085	MPP4	membrane protein, palmitoylated 4 (MAGUK p55 subfamily member 4)	ENST00000409818	NP384664	GO:0005737	Homo sapiens membrane protein, palmitoylated 4 (MAGUK p55 subfamily member 4) (MPP4), mRNA [NM_033066]	chr2:202510065-202510006	hs|2q33.1	Agilent_HUMAN_G3V2	NM_033066	chr2	202510006	202510065	-
LNCA_33_P3346543	0.00988728	4.38695	mRNA	THC2674526	NA	NA	NA	NA	NA	NA	NA	THC2674526	NA	NA	chr20:006747381-006747440	hs|20p12.3	Agilent_HUMAN_G3V2	THC2674526	chr20	6747381	6747440	+
LNCA_33_P3323298	0.0105491	4.37581	mRNA	NM_002228	NM_002228	NM_002228	3725	Hs.696684	JUN	jun proto-oncogene	ENST00000371222	THC2469957	GO:0005515|GO:0014070|GO:0042542|GO:0000790|GO:0003700|GO:0044212|GO:0003705|GO:0051591|GO:0051403|GO:0042803|GO:0002756|GO:0043524|GO:0043525|GO:0003690|GO:0045657|GO:0002755|GO:0017053|GO:0032496|GO:0007179|GO:0007612|GO:0034130|GO:0009987|GO:0034134|GO:0045740|GO:0007568|GO:0003713|GO:0002224|GO:0043923|GO:0043922|GO:0043392|GO:0001889|GO:0032321|GO:0045087|GO:0007184|GO:0007623|GO:0005654|GO:…	Homo sapiens jun proto-oncogene (JUN), mRNA [NM_002228]	chr1:59246570-59246511	hs|1p32.1	Agilent_HUMAN_G3V2	NM_002228	chr1	59246511	59246570	-
LNCA_33_P3357658	0.0328051	4.3502	mRNA	NM_003484	NM_003484	NM_003484	8091	Hs.505924	HMGA2	high mobility group AT-hook 2	ENST00000354636	THC2477434	GO:0005515|GO:0003906|GO:0000988|GO:0030261|GO:0004677|GO:0006325|GO:0046332|GO:0010564|GO:0071158|GO:0032993|GO:0002062|GO:0045444|GO:0000785|GO:0000975|GO:0008301|GO:0071141|GO:0031492|GO:0007275|GO:0001047|GO:0000122|GO:2000036|GO:0043392|GO:0043922|GO:0007049|GO:0003131|GO:0006284|GO:0070742|GO:0045893|GO:0045892|GO:0040008|GO:0051301|GO:0008134|GO:0007095|GO:2000679|GO:0031507|GO:0035497|GO:…	Homo sapiens high mobility group AT-hook 2 (HMGA2), transcript variant 2, mRNA [NM_003484]	chr12:66309240-66309299	hs|12q14.3	Agilent_HUMAN_G3V2	NM_003484	chr12	66309240	66309299	+
LNCA_23_P142830	0.0367538	4.34671	mRNA	NM_007366	NM_007366	NM_007366	22925	Hs.410477	PLA2R1	phospholipase A2 receptor 1, 180kDa	ENST00000392771	THC2486088	GO:0032429|GO:0005886|GO:0009986|GO:0072593|GO:0005529|GO:0090403|GO:0090238|GO:0090237|GO:0005576|GO:0001816|GO:0006898|GO:0006897|GO:0005488|GO:0005887|GO:0043274|GO:0043517|GO:0004872|GO:0016021|GO:0090399	Homo sapiens phospholipase A2 receptor 1, 180kDa (PLA2R1), transcript variant 1, mRNA [NM_007366]	chr2:160807857-160806235	hs|2q24.2	Agilent_HUMAN_G3V2	NM_007366	chr2	160806235	160807857	-
LNCA_33_P3366301	0.00784135	4.33126	mRNA	NR_026732	NR_026732	NR_026732	387978	NA	C14orf23	chromosome 14 open reading frame 23	ENST00000552957	NA	NA	Homo sapiens chromosome 14 open reading frame 23 (C14orf23), transcript variant 2, non-coding RNA [NR_026732]	chr14:29247707-29247766	hs|14q12	Agilent_HUMAN_G3V2	NR_026732	chr14	29247707	29247766	+
LNCA_33_P3298810	0.000713373	4.32626	mRNA	NM_005304	NM_005304	NM_005304	2865	Hs.248055	FFAR3	free fatty acid receptor 3	ENST00000454971	THC2478484	GO:0007186|GO:0005886|GO:0005887|GO:0004930|GO:0004872|GO:0004871|GO:0008289	Homo sapiens free fatty acid receptor 3 (FFAR3), mRNA [NM_005304]	chr19:35851300-35851359	hs|19q13.12	Agilent_HUMAN_G3V2	NM_005304	chr19	35851300	35851359	+
LNCA_33_P3347911	0.0124138	4.31883	mRNA	NM_001214903	NM_001214903	NM_001214903	2100	Hs.660607	ESR2	estrogen receptor 2 (ER beta)	ENST00000357782	NP083886	GO:0005515|GO:0034339|GO:0010467|GO:0060065|GO:0030308|GO:0003700|GO:0060068|GO:0050680|GO:0003707|GO:0007267|GO:0030284|GO:0005634|GO:0046872|GO:0005739|GO:0001541|GO:0043401|GO:0004872|GO:0004879|GO:0009968|GO:0048019|GO:0005496|GO:0006355|GO:0043065|GO:0060743|GO:0003713|GO:0060740|GO:0060766|GO:0003677|GO:0043565|GO:0007165|GO:0007420|GO:0005654|GO:0008270|GO:0001764|GO:0019899|GO:0030522|GO:…	Homo sapiens estrogen receptor 2 (ER beta) (ESR2), transcript variant e, mRNA [NM_001214903]	chr14:64735617-64735558	hs|14q23.2	Agilent_HUMAN_G3V2	NM_001214903	chr14	64735558	64735617	-
LNCA_33_P3342481	0.0155851	4.31744	mRNA	THC2723408	NA	NA	NA	NA	NA	NA	NA	THC2723408	NA	NA	chr2:090520625-090520566	hs|2p11.1	Agilent_HUMAN_G3V2	THC2723408	chr2	90520566	90520625	-
LNCA_33_P3421028	0.0139236	4.2826	mRNA	ENST00000403284	NA	NA	6098	NA	ROS1	c-ros oncogene 1 , receptor tyrosine kinase	ENST00000403284	THC2709829	GO:0032006|GO:0005886|GO:0008283|GO:0019903|GO:0005624|GO:0007283|GO:0005524|GO:0030154|GO:0002066|GO:0000166|GO:0010629|GO:0016049|GO:0004872|GO:0006468|GO:0016021|GO:0004713|GO:0004714|GO:0070372|GO:0007169|GO:0010966	c-ros oncogene 1 , receptor tyrosine kinase [Source:HGNC Symbol;Acc:10261] [ENST00000403284]	chr6:117649719-117649660	hs|6q22.1	Agilent_HUMAN_G3V2	ENST00000403284	chr6	117649660	117649719	-
LNCA_23_P106362	0.0203989	4.27648	mRNA	NM_020980	NM_020980	NM_020980	366	Hs.104624	AQP9	aquaporin 9	ENST00000219919	NP509229	GO:0005215|GO:0005886|GO:0006863|GO:0005275|GO:0043231|GO:0030104|GO:0016323|GO:0046942|GO:0006955|GO:0046943|GO:0005350|GO:0015791|GO:0015250|GO:0015793|GO:0015837|GO:0006810|GO:0005372|GO:0006833|GO:0015254|GO:0015855|GO:0005792|GO:0007588|GO:0010033|GO:0006970|GO:0055085|GO:0005887|GO:0015166|GO:0008152|GO:0015722|GO:0005345|GO:0015288|GO:0016021|GO:0071320|GO:0046689	Homo sapiens aquaporin 9 (AQP9), mRNA [NM_020980]	chr15:58477884-58477943	hs|15q21.3	Agilent_HUMAN_G3V2	NM_020980	chr15	58477884	58477943	+
LNCA_21_P0006043	0.020222	4.24415	mRNA	ENST00000433546	NA	BE671722	NA	Hs.522362	XLOC_007532	NA	ENST00000433546	NA	NA	7a44d03.x1 NCI_CGAP_GC6 Homo sapiens cDNA clone IMAGE:3221573 3', mRNA sequence [BE671722]	chr9:118503784-118503843	hs|9q33.1	Agilent_HUMAN_G3V2	ENST00000433546	chr9	118503784	118503843	+
LNCA_21_P0013128	0.0158926	4.23504	mRNA	ENST00000412771	NA	NA	NA	NA	XLOC_l2_012467	NA	ENST00000412771	THC2575115	NA	NA	chr6:28956190-28956249	hs|6p22.1	Agilent_HUMAN_G3V2	ENST00000412771	chr6	28956190	28956249	+
LNCA_21_P0003271	0.00433173	4.1957	mRNA	THC2690734	NA	NA	NA	NA	XLOC_002958	NA	NA	THC2690734	NA	Q7QN31_ANOGA (Q7QN31) ENSANGP00000000823, partial (8%) [THC2690734]	chr3:186164241-186164300	hs|3q27.3	Agilent_HUMAN_G3V2	THC2690734	chr3	186164241	186164300	+
LNCA_21_P0012521	0.0452716	4.16882	mRNA	NR_033752	NR_033752	NR_033752	NA	Hs.730410	LOC344887	NmrA-like family domain containing 1 pseudogene	ENST00000416764	THC2513282	NA	Homo sapiens NmrA-like family domain containing 1 pseudogene (LOC344887), non-coding RNA [NR_033752]	chr3:185686388-185686447	hs|3q27.2	Agilent_HUMAN_G3V2	NR_033752	chr3	185686388	185686447	+
LNCA_21_P0000178	0.0163869	4.1573	mRNA	NM_001242589	NM_001242589	NM_001242589	NA	Hs.283022	TREM1	triggering receptor expressed on myeloid cells 1	NA	THC2620768	GO:0035556|GO:0005622|GO:0005886|GO:0007596|GO:0006959|GO:0005576|GO:0004872|GO:0016021|GO:0050900	Homo sapiens triggering receptor expressed on myeloid cells 1 (TREM1), transcript variant 2, mRNA [NM_001242589]	chr6:41247341-41247282	hs|6p21.1	Agilent_HUMAN_G3V2	NM_001242589	chr6	41247282	41247341	-
LNCA_23_P209625	0.0460332	4.14786	mRNA	NM_000104	NM_000104	NM_000104	1545	Hs.154654	CYP1B1	cytochrome P450, family 1, subfamily B, polypeptide 1	ENST00000260630	THC2729686	GO:0005792|GO:0006725|GO:0006805|GO:0010033|GO:0070330|GO:0005783|GO:0061298|GO:0071603|GO:0009055|GO:0009636|GO:0001525|GO:0046872|GO:0004497|GO:0008210|GO:0019825|GO:0016020|GO:0043542|GO:0005789|GO:0016712|GO:0009404|GO:0007601|GO:0055114|GO:0020037	Homo sapiens cytochrome P450, family 1, subfamily B, polypeptide 1 (CYP1B1), mRNA [NM_000104]	chr2:38295503-38295444	hs|2p22.2	Agilent_HUMAN_G3V2	NM_000104	chr2	38295444	38295503	-
LNCA_33_P3277373	0.0327989	4.12049	mRNA	NM_020530	NM_020530	NM_020530	5008	Hs.248156	OSM	oncostatin M	ENST00000215781	THC2474967	GO:0042506|GO:0008284|GO:0008285|GO:0042503|GO:0009408|GO:0008283|GO:0042508|GO:0050731|GO:0005615|GO:0046888|GO:0006955|GO:0033138|GO:0002675|GO:0045944|GO:0051781|GO:0005147|GO:0006915|GO:0007275|GO:0005576|GO:0005125|GO:0007422|GO:0005900|GO:0043410|GO:0008083|GO:0045835|GO:0048266|GO:0040008	Homo sapiens oncostatin M (OSM), mRNA [NM_020530]	chr22:30660206-30660147	hs|22q12.2	Agilent_HUMAN_G3V2	NM_020530	chr22	30660147	30660206	-
LNCA_23_P19886	0.0426633	4.06464	mRNA	NM_207173	NM_207173	NM_207173	387129	Hs.652373	NPSR1	neuropeptide S receptor 1	ENST00000381539	NP662978	GO:0005737|GO:0005886|GO:0004930|GO:0005000|GO:0004872|GO:0016021|GO:0004871	Homo sapiens neuropeptide S receptor 1 (NPSR1), transcript variant 2, mRNA [NM_207173]	chr7:34888103-34888162	hs|7p14.3	Agilent_HUMAN_G3V2	NM_207173	chr7	34888103	34888162	+
LNCA_23_P119222	0.0113435	4.05963	mRNA	NM_020415	NM_020415	NM_020415	56729	Hs.283091	RETN	resistin	ENST00000221515	THC2478211	GO:0032868|GO:0008150|GO:0005179|GO:0045444|GO:0005634|GO:0005576|GO:0005615	Homo sapiens resistin (RETN), transcript variant 1, mRNA [NM_020415]	chr19:7734716-7734775	hs|19p13.2	Agilent_HUMAN_G3V2	NM_020415	chr19	7734716	7734775	+
LNCA_33_P3318490	0.0389335	4.04005	mRNA	BC014432	NA	BC014432	23024	Hs.434900	PDZRN3	PDZ domain containing ring finger 3	ENST00000308537	THC2482835	GO:0004842|GO:0031594|GO:0016567|GO:0007528|GO:0016874|GO:0008270|GO:0046872	Homo sapiens PDZ domain containing ring finger 3, mRNA (cDNA clone IMAGE:4639477), complete cds. [BC014432]	chr3:73457306-73457247	hs|3p13	Agilent_HUMAN_G3V2	BC014432	chr3	73457247	73457306	-
LNCA_21_P0006264	0.0136228	4.02248	mRNA	BQ025577	NA	BQ025577	NA	Hs.561942	XLOC_007686	NA	NA	NA	NA	UI-1-BB1p-axx-c-10-0-UI.s1 NCI_CGAP_Pl6 Homo sapiens cDNA clone UI-1-BB1p-axx-c-10-0-UI 3', mRNA sequence [BQ025577]	chr9:38070478-38070419	hs|9p13.2	Agilent_HUMAN_G3V2	BQ025577	chr9	38070419	38070478	-
LNCA_21_P0003951	0.0297877	4.02058	mRNA	ENST00000512521	NA	DB030232	NA	Hs.518991	XLOC_004263	NA	ENST00000512521	NA	NA	DB030232 TESTI2 Homo sapiens cDNA clone TESTI2013722 5', mRNA sequence [DB030232]	chr5:3461658-3461717	hs|5p15.33	Agilent_HUMAN_G3V2	ENST00000512521	chr5	3461658	3461717	+
LNCA_23_P64721	0.0154037	3.96258	mRNA	NM_006018	NM_006018	NM_006018	8843	Hs.458425	HCAR3	hydroxycarboxylic acid receptor 3	ENST00000528880	THC2461513	GO:0007186|GO:0005886|GO:0045028|GO:0005887|GO:0004930|GO:0004872|GO:0004871	Homo sapiens hydroxycarboxylic acid receptor 3 (HCAR3), mRNA [NM_006018]	chr12:123199654-123199595	hs|12q24.31	Agilent_HUMAN_G3V2	NM_006018	chr12	123199595	123199654	-
LNCA_33_P3350863	0.0189385	3.92762	mRNA	NM_020415	NM_020415	NM_020415	56729	Hs.283091	RETN	resistin	ENST00000221515	THC2478211	GO:0032868|GO:0008150|GO:0005179|GO:0045444|GO:0005634|GO:0005576|GO:0005615	Homo sapiens resistin (RETN), transcript variant 1, mRNA [NM_020415]	chr19:7735274-7735333	hs|19p13.2	Agilent_HUMAN_G3V2	NM_020415	chr19	7735274	7735333	+
LNCA_23_P300847	0.0421601	3.92618	mRNA	ENST00000555882	NA	AF469204	NA	Hs.525597	NA	NA	ENST00000555882	NP1139581	NA	DIO3 opposite strand (non-protein coding) [Source:HGNC Symbol;Acc:20348] [ENST00000555882]	chr14:102025111-102025052	hs|14q32.31	Agilent_HUMAN_G3V2	ENST00000555882	chr14	102025052	102025111	-
LNCA_33_P3369975	0.0148694	3.90934	mRNA	NM_001004687	NM_001004687	NM_001004687	391192	Hs.690412	OR2L3	olfactory receptor, family 2, subfamily L, member 3	ENST00000359959	THC2603798	GO:0008150|GO:0003674|GO:0004984|GO:0005886|GO:0004930|GO:0004872|GO:0016021|GO:0004871|GO:0050896	Homo sapiens olfactory receptor, family 2, subfamily L, member 3 (OR2L3), mRNA [NM_001004687]	chr1:248224481-248224540	hs|1q44	Agilent_HUMAN_G3V2	NM_001004687	chr1	248224481	248224540	+
LNCA_21_P0001854	0.00656745	3.90482	mRNA	ENST00000457385	NA	NA	NA	NA	XLOC_001436	NA	ENST00000457385	THC2711401	NA	Q7TFU7_RHCM6 (Q7TFU7) Rh34, partial (11%) [THC2711401]	chr2:38660488-38660547	hs|2p22.1	Agilent_HUMAN_G3V2	ENST00000457385	chr2	38660488	38660547	+
LNCA_21_P0001037	0.0100273	3.88735	mRNA	ENST00000444887	NA	BG182723	NA	Hs.568709	XLOC_000498	NA	ENST00000444887	NA	NA	RST1600 Athersys RAGE Library Homo sapiens cDNA, mRNA sequence [BG182723]	chr1:187412804-187439207	hs|1q31.1	Agilent_HUMAN_G3V2	ENST00000444887	chr1	187412804	187439207	+
LNCA_23_P63390	0.00209236	3.87737	mRNA	NM_001017986	NM_001017986	NM_001017986	2210	Hs.534956	FCGR1B	Fc fragment of IgG, high affinity Ib, receptor (CD64)	ENST00000444948	THC2717837	GO:0006955|GO:0005886|GO:0019864|GO:0019221|GO:0004872|GO:0016021|GO:0060333|GO:0019763	Homo sapiens Fc fragment of IgG, high affinity Ib, receptor (CD64) (FCGR1B), transcript variant 1, mRNA [NM_001017986]	chr1:120927353-120927294	hs|1p11.2	Agilent_HUMAN_G3V2	NM_001017986	chr1	120927294	120927353	-
LNCA_19_P00323692	0.00803789	3.87466	mRNA	NR_001564	NR_001564	NR_001564	NA	NA	XIST	X (inactive)-specific transcript (non-protein coding)	NA	THC2501975	NA	Homo sapiens X (inactive)-specific transcript (non-protein coding) (XIST), non-coding RNA [NR_001564]	chrX:73040756-73040697	hs|Xq13.2	Agilent_HUMAN_G3V2	NR_001564	chrX	73040697	73040756	-
LNCA_21_P0001048	0.00123023	3.8635	mRNA	ENST00000432488	NA	BG613973	NA	Hs.576501	XLOC_000514	NA	ENST00000432488	NA	NA	602641695F1 NIH_MGC_61 Homo sapiens cDNA clone IMAGE:4772926 5', mRNA sequence [BG613973]	chr1:199010779-199045689	hs|1q32.1	Agilent_HUMAN_G3V2	ENST00000432488	chr1	199010779	199045689	+
LNCA_32_P515971	0.0252908	3.84902	mRNA	NM_173503	NM_173503	NM_173503	146779	Hs.152670	EFCAB3	EF-hand calcium binding domain 3	ENST00000305286	THC2485005	GO:0005509	Homo sapiens EF-hand calcium binding domain 3 (EFCAB3), transcript variant 2, mRNA [NM_173503]	chr17:60484392-60484451	hs|17q23.2	Agilent_HUMAN_G3V2	NM_173503	chr17	60484392	60484451	+
LNCA_24_P940006	0.00927479	3.83502	mRNA	NM_001406	NM_001406	NM_001406	1949	Hs.26988	EFNB3	ephrin-B3	ENST00000226091	THC2611490	GO:0005005|GO:0048013|GO:0046875|GO:0016020|GO:0005887|GO:0044419|GO:0016198|GO:0007628|GO:0007267|GO:0007275|GO:0030154|GO:0007399	Homo sapiens ephrin-B3 (EFNB3), mRNA [NM_001406]	chr17:7614123-7614182	hs|17p13.1	Agilent_HUMAN_G3V2	NM_001406	chr17	7614123	7614182	+
LNCA_33_P3216718	0.00688444	3.82921	mRNA	NA	NA	NA	NA	NA	NA	NA	NA	NA	NA	NA	chr1:213602110-213602051	hs|1q32.3	Agilent_HUMAN_G3V2	NA	chr1	213602051	213602110	-
LNCA_33_P3366493	0.0145993	3.81385	mRNA	NA	NA	NA	NA	NA	NA	NA	NA	NA	NA	NA	chr12:133322465-133322524	hs|12q24.33	Agilent_HUMAN_G3V2	NA	chr12	133322465	133322524	+
LNCA_33_P3538688	0.0340061	3.79936	mRNA	CD243491	NA	CD243491	8370	Hs.655235	HIST2H4A	histone cluster 2, H4a	NA	NA	NA	AGENCOURT_14121959 NIH_MGC_180 Homo sapiens cDNA clone IMAGE:30383034 5', mRNA sequence [CD243491]	NA	NA	Agilent_HUMAN_G3V2	CD243491	NA	NA	NA	+
LNCA_23_P310972	0.0143921	3.7992	mRNA	NM_032095	NM_032095	NM_032095	56104	Hs.368160	PCDHGB1	protocadherin gamma subfamily B, 1	NA	THC2601404	GO:0005886|GO:0005509|GO:0016021|GO:0007155|GO:0007156	Homo sapiens protocadherin gamma subfamily B, 1 (PCDHGB1), transcript variant 2, mRNA [NM_032095]	chr5:140732188-140732247	hs|5q31.3	Agilent_HUMAN_G3V2	NM_032095	chr5	140732188	140732247	+
LNCA_33_P3363732	0.0169598	3.78257	mRNA	NM_021247	NM_021247	NM_021247	58531	Hs.259636	PRM3	protamine 3	ENST00000327157	THC2710313	GO:0008150|GO:0003674|GO:0030261|GO:0005694|GO:0007275|GO:0005634|GO:0007283|GO:0005575|GO:0000786|GO:0003677|GO:0030154	Homo sapiens protamine 3 (PRM3), mRNA [NM_021247]	chr16:11367367-11367308	hs|16p13.13	Agilent_HUMAN_G3V2	NM_021247	chr16	11367308	11367367	-
LNCA_23_P338410	0.0226	3.77362	mRNA	NM_147198	NM_147198	NM_147198	259240	Hs.249828	WFDC9	WAP four-disulfide core domain 9	ENST00000326000	THC2482008	GO:0005576	Homo sapiens WAP four-disulfide core domain 9 (WFDC9), mRNA [NM_147198]	chr20:44236664-44236605	hs|20q13.12	Agilent_HUMAN_G3V2	NM_147198	chr20	44236605	44236664	-
LNCA_23_P71316	0.0425989	3.743	mRNA	NM_001008712	NM_001008712	NM_001008712	11030	Hs.334587	RBPMS	RNA binding protein with multiple splicing	ENST00000522708	THC2502632	GO:0005515|GO:0006396|GO:0006355|GO:0005737|GO:0000166|GO:0003723|GO:0008143|GO:0003713|GO:0010862|GO:0005634|GO:0060391	Homo sapiens RNA binding protein with multiple splicing (RBPMS), transcript variant 3, mRNA [NM_001008712]	chr8:30335321-30336857	hs|8p12	Agilent_HUMAN_G3V2	NM_001008712	chr8	30335321	30336857	+
LNCA_33_P3341891	0.0308265	3.72382	mRNA	NR_033946	NR_033946	NR_033946	646268	Hs.506902	LOC646268	hCG1654703	ENST00000414848	THC2659314	NA	Homo sapiens hCG1654703 (LOC646268), non-coding RNA [NR_033946]	chr1:158101923-158101864	hs|1q23.1	Agilent_HUMAN_G3V2	NR_033946	chr1	158101864	158101923	-
LNCA_19_P00319369	0.0210008	3.70884	mRNA	NR_027104	NR_027104	NR_027104	NA	Hs.211125	LOC285401	uncharacterized LOC285401	NA	THC2612137	NA	Homo sapiens uncharacterized LOC285401 (LOC285401), non-coding RNA [NR_027104]	chr3:63110222-63110281	hs|3p14.2	Agilent_HUMAN_G3V2	NR_027104	chr3	63110222	63110281	+
LNCA_33_P3239724	0.0307408	3.69892	mRNA	NA	NA	NA	NA	NA	NA	NA	NA	NA	NA	NA	chr5:017490752-017490693	hs|5p15.1	Agilent_HUMAN_G3V2	NA	chr5	17490693	17490752	-
LNCA_23_P47199	0.0069096	3.67504	mRNA	NM_018484	NM_018484	NM_018484	55867	Hs.220844	SLC22A11	solute carrier family 22 (organic anion/urate transporter), member 11	ENST00000301891	THC2463086	GO:0005515|GO:0005886|GO:0015347|GO:0022857|GO:0046415|GO:0055085|GO:0016324|GO:0005452|GO:0005887|GO:0015711|GO:0008514|GO:0009897|GO:0006811	Homo sapiens solute carrier family 22 (organic anion/urate transporter), member 11 (SLC22A11), mRNA [NM_018484]	chr11:64336192-64337124	hs|11q13.1	Agilent_HUMAN_G3V2	NM_018484	chr11	64336192	64337124	+
LNCA_21_P0004067	0.00330186	3.66529	mRNA	ENST00000502421	NA	DA350472	NA	Hs.628443	XLOC_004569	NA	ENST00000502421	NA	NA	DA350472 BRSSN2 Homo sapiens cDNA clone BRSSN2013087 5', mRNA sequence [DA350472]	chr5:136090278-136090337	hs|5q31.1	Agilent_HUMAN_G3V2	ENST00000502421	chr5	136090278	136090337	+
LNCA_23_P410600	0.00389636	3.65492	mRNA	NM_033261	NM_033261	NM_033261	91734	Hs.591325	IDI2	isopentenyl-diphosphate delta isomerase 2	ENST00000277517	THC2474546	GO:0006695|GO:0016787|GO:0016853|GO:0008299|GO:0004452|GO:0046872|GO:0005829|GO:0005777	Homo sapiens isopentenyl-diphosphate delta isomerase 2 (IDI2), mRNA [NM_033261]	chr10:1068643-1066799	hs|10p15.3	Agilent_HUMAN_G3V2	NM_033261	chr10	1066799	1068643	-
LNCA_33_P3214066	0.00216602	3.63021	mRNA	NR_034143	NR_034143	NR_034143	729177	Hs.730673	LOC729177	uncharacterized LOC729177	NA	THC2510121	NA	Homo sapiens uncharacterized LOC729177 (LOC729177), non-coding RNA [NR_034143]	chr6:22135245-22135186	hs|6p22.3	Agilent_HUMAN_G3V2	NR_034143	chr6	22135186	22135245	-
LNCA_21_P0011964	0.0204897	3.62183	mRNA	ENST00000444030	NA	NA	NA	NA	XLOC_l2_008259	NA	ENST00000444030	THC2538414	NA	BC022267 male sterility domain containing 1 {Homo sapiens} (exp=-1; wgp=0; cg=0), partial (6%) [THC2538414]	chr2:130769794-130769735	hs|2q21.1	Agilent_HUMAN_G3V2	ENST00000444030	chr2	130769735	130769794	-
LNCA_23_P70814	0.0242761	3.59509	mRNA	NR_026773	NR_026773	NR_026773	26238	Hs.520583	C6orf123	chromosome 6 open reading frame 123	ENST00000495520	THC2485325	GO:0008150|GO:0003674|GO:0005575	Homo sapiens chromosome 6 open reading frame 123 (C6orf123), non-coding RNA [NR_026773]	chr6:168188056-168187997	hs|6q27	Agilent_HUMAN_G3V2	NR_026773	chr6	168187997	168188056	-
LNCA_24_P252497	0.00896999	3.59298	mRNA	NM_025195	NM_025195	NM_025195	10221	Hs.444947	TRIB1	tribbles homolog 1 (Drosophila)	ENST00000311922	THC2466660	GO:0032436|GO:0007254|GO:0031434|GO:0048662|GO:0005634|GO:0005524|GO:0043433|GO:0014912|GO:0005737|GO:0004672|GO:0043405|GO:0032496|GO:0004860|GO:0055106|GO:0006468|GO:0031665|GO:0006469|GO:0031625|GO:0008134|GO:0016772	Homo sapiens tribbles homolog 1 (Drosophila) (TRIB1), mRNA [NM_025195]	chr8:126450454-126450513	hs|8q24.13	Agilent_HUMAN_G3V2	NM_025195	chr8	126450454	126450513	+
LNCA_33_P3319905	0.00749193	3.59068	mRNA	NM_018643	NM_018643	NM_018643	54210	Hs.283022	TREM1	triggering receptor expressed on myeloid cells 1	NA	THC2690244	GO:0035556|GO:0005622|GO:0005886|GO:0007596|GO:0006959|GO:0005576|GO:0004872|GO:0016021|GO:0050900	Homo sapiens triggering receptor expressed on myeloid cells 1 (TREM1), transcript variant 1, mRNA [NM_018643]	chr6:41243592-41243533	hs|6p21.1	Agilent_HUMAN_G3V2	NM_018643	chr6	41243533	41243592	-
LNCA_33_P3507562	0.0243516	3.58029	mRNA	BM548627	NA	BM548627	23642	Hs.655643	SNHG1	small nucleolar RNA host gene 1 (non-protein coding)	NA	NA	NA	AGENCOURT_6573317 NIH_MGC_124 Homo sapiens cDNA clone IMAGE:5732165 5', mRNA sequence [BM548627]	chr11:62619547-62619488	hs|11q12.3	Agilent_HUMAN_G3V2	BM548627	chr11	62619488	62619547	-
LNCA_33_P3233318	0.00283805	3.56952	mRNA	XM_001714957	XM_001714957	XM_001714957	442366	NA	LOC442366	uncharacterized LOC442366	NA	NA	NA	PREDICTED: Homo sapiens hypothetical protein LOC442366 (LOC442366), mRNA [XM_001714957]	chr7:158785184-158785125	hs|7q36.3	Agilent_HUMAN_G3V2	XM_001714957	chr7	158785125	158785184	-
LNCA_33_P3270628	0.00730993	3.53948	mRNA	ENST00000448015	NA	BE468260	NA	Hs.568575	NA	NA	ENST00000448015	NA	NA	hz71c05.x1 NCI_CGAP_Lu24 Homo sapiens cDNA clone IMAGE:3213416 3' similar to TR:Q92485 Q92485 ACID SPHINGOMYELINASE-LIKE PHOSPHODIESTERASE. ;, mRNA sequence [BE468260]	chr1:28265447-28265388	hs|1p35.3	Agilent_HUMAN_G3V2	ENST00000448015	chr1	28265388	28265447	-
LNCA_21_P0000586	0.0083709	3.46388	mRNA	NR_030737	NR_030737	NR_030737	NA	NA	TTC3P1	tetratricopeptide repeat domain 3 pseudogene 1	NA	THC2778650	NA	Homo sapiens tetratricopeptide repeat domain 3 pseudogene 1 (TTC3P1), non-coding RNA [NR_030737]	chrX:74960492-74960433	hs|Xq13.3	Agilent_HUMAN_G3V2	NR_030737	chrX	74960433	74960492	-
LNCA_33_P3322175	0.0389132	3.44301	mRNA	NA	NA	NA	NA	NA	NA	NA	NA	NA	NA	NA	chr19:052343361-052343302	hs|19q13.41	Agilent_HUMAN_G3V2	NA	chr19	52343302	52343361	-
LNCA_21_P0004057	0.0313354	3.42957	mRNA	ENST00000502809	NA	AW968277	NA	Hs.177723	XLOC_004534	NA	ENST00000502809	NA	NA	EST380247 MAGE resequences, MAGJ Homo sapiens cDNA, mRNA sequence [AW968277]	chr5:123795729-123795788	hs|5q23.2	Agilent_HUMAN_G3V2	ENST00000502809	chr5	123795729	123795788	+
LNCA_19_P00804859	0.0104939	3.40978	mRNA	NR_029635	NR_029635	NR_029635	NA	Hs.729879	MIR221	NA	NA	THC2777025	NA	Homo sapiens microRNA 221 (MIR221), microRNA [NR_029635]	chrX:45605661-45605602	hs|Xp11.3	Agilent_HUMAN_G3V2	NR_029635	chrX	45605602	45605661	-
LNCA_21_P0010561	0.00577059	3.40708	mRNA	NM_001244910	NM_001244910	NM_001244910	NA	Hs.635062	FCGR1B	Fc fragment of IgG, high affinity Ib, receptor (CD64)	ENST00000369178	THC2607809	GO:0006955|GO:0005886|GO:0019864|GO:0019221|GO:0004872|GO:0016021|GO:0060333|GO:0019763	Homo sapiens Fc fragment of IgG, high affinity Ib, receptor (CD64) (FCGR1B), transcript variant 3, mRNA [NM_001244910]	chr1:120930167-120930108	hs|1p11.2	Agilent_HUMAN_G3V2	NM_001244910	chr1	120930108	120930167	-
LNCA_21_P0010728	0.00998994	3.39224	mRNA	NM_001244910	NM_001244910	NM_001244910	NA	Hs.635062	FCGR1B	Fc fragment of IgG, high affinity Ib, receptor (CD64)	ENST00000369178	THC2717837	GO:0006955|GO:0005886|GO:0019864|GO:0019221|GO:0004872|GO:0016021|GO:0060333|GO:0019763	Homo sapiens Fc fragment of IgG, high affinity Ib, receptor (CD64) (FCGR1B), transcript variant 3, mRNA [NM_001244910]	chr1:120930098-120930039	hs|1p11.2	Agilent_HUMAN_G3V2	NM_001244910	chr1	120930039	120930098	-
LNCA_23_P67896	0.0112882	3.38379	mRNA	NM_006922	NM_006922	NM_006922	6328	Hs.435274	SCN3A	sodium channel, voltage-gated, type III, alpha subunit	ENST00000540861	THC2476806	GO:0005244|GO:0016020|GO:0005248|GO:0001518|GO:0016021|GO:0006814|GO:0055085|GO:0006811	Homo sapiens sodium channel, voltage-gated, type III, alpha subunit (SCN3A), transcript variant 1, mRNA [NM_006922]	chr2:165946977-165946918	hs|2q24.3	Agilent_HUMAN_G3V2	NM_006922	chr2	165946918	165946977	-
LNCA_33_P3402931	0.00917055	3.38354	mRNA	NM_001024613	NM_001024613	NM_001024613	389549	Hs.553970	FEZF1	FEZ family zinc finger 1	ENST00000427185	THC2505731	GO:0006355|GO:0005634|GO:0007275|GO:0000978|GO:0003677|GO:0046872|GO:0030154|GO:0007399|GO:0005622|GO:0021772|GO:0045666|GO:0007411|GO:0021797|GO:0008270|GO:0030900|GO:0001764	Homo sapiens FEZ family zinc finger 1 (FEZF1), transcript variant 1, mRNA [NM_001024613]	chr7:121942255-121942196	hs|7q31.32	Agilent_HUMAN_G3V2	NM_001024613	chr7	121942196	121942255	-
LNCA_23_P130113	0.00872115	3.36236	mRNA	NM_080912	NM_080912	NM_080912	433	Hs.654440	ASGR2	asialoglycoprotein receptor 2	ENST00000380952	NP430482	GO:0005515|GO:0009100|GO:0031647|GO:0016020|GO:0055088|GO:0005529|GO:0004873|GO:0004872|GO:0030282|GO:0016021|GO:0007166|GO:0006897	Homo sapiens asialoglycoprotein receptor 2 (ASGR2), transcript variant H2', mRNA [NM_080912]	chr17:7004739-7004680	hs|17p13.1	Agilent_HUMAN_G3V2	NM_080912	chr17	7004680	7004739	-
LNCA_24_P940477	0.00644619	3.35932	mRNA	NA	NA	NA	NA	NA	NA	NA	NA	NA	NA	NA	chr9:133454281-133454340	hs|9q34.11	Agilent_HUMAN_G3V2	NA	chr9	133454281	133454340	+
LNCA_23_P87879	0.019418	3.34555	mRNA	NM_001781	NM_001781	NM_001781	969	Hs.208854	CD69	CD69 molecule	ENST00000228434	THC2461298	GO:0016020|GO:0005887|GO:0005488|GO:0005529|GO:0035690|GO:0009897|GO:0004888	Homo sapiens CD69 molecule (CD69), transcript variant 1, mRNA [NM_001781]	chr12:9905320-9905261	hs|12p13.31	Agilent_HUMAN_G3V2	NM_001781	chr12	9905261	9905320	-
LNCA_23_P208768	0.0030685	3.3407	mRNA	NM_002000	NM_002000	NM_002000	2204	Hs.659872	FCAR	Fc fragment of IgA, receptor for	ENST00000355524	NP446026	GO:0006955|GO:0019862|GO:0005886|GO:0005887|GO:0005576|GO:0004872	Homo sapiens Fc fragment of IgA, receptor for (FCAR), transcript variant 1, mRNA [NM_002000]	chr19:55401659-55401718	hs|19q13.42	Agilent_HUMAN_G3V2	NM_002000	chr19	55401659	55401718	+
LNCA_33_P3388080	0.000870201	3.33592	mRNA	CN263935	NA	CN263935	731223	Hs.534624	LOC731223	uncharacterized LOC731223	NA	THC2683935	NA	17000424187223 GRN_EB Homo sapiens cDNA 5', mRNA sequence [CN263935]	chr14:75763169-75763228	hs|14q24.3	Agilent_HUMAN_G3V2	CN263935	chr14	75763169	75763228	+
LNCA_24_P307808	0.00995933	3.3221	mRNA	NM_020768	NM_020768	NM_020768	57528	Hs.661870	KCTD16	potassium channel tetramerisation domain containing 16	ENST00000507359	THC2602349	GO:0042734|GO:0030054|GO:0005886|GO:0045211|GO:0008076|GO:0005249|GO:0045202|GO:0006813	Homo sapiens potassium channel tetramerisation domain containing 16 (KCTD16), mRNA [NM_020768]	chr5:143856649-143856708	hs|5q31.3	Agilent_HUMAN_G3V2	NM_020768	chr5	143856649	143856708	+
LNCA_33_P3349265	0.00946067	3.3207	mRNA	NM_001010904	NM_001010904	NM_001010904	389396	Hs.585172	GLYATL3	glycine-N-acyltransferase-like 3	ENST00000371197	NP1245750	GO:0005739|GO:0016746|GO:0047961	Homo sapiens glycine-N-acyltransferase-like 3 (GLYATL3), mRNA [NM_001010904]	chr6:49494542-49494601	hs|6p12.3	Agilent_HUMAN_G3V2	NM_001010904	chr6	49494542	49494601	+
LNCA_33_P3270723	0.0181289	3.31631	mRNA	NM_198564	NM_198564	NM_198564	201625	Hs.201378	DNAH12	dynein, axonemal, heavy chain 12	ENST00000311202	THC2482658	GO:0005929|GO:0005737|GO:0030286|GO:0000166|GO:0005874|GO:0035085|GO:0005856|GO:0003777|GO:0016887|GO:0005524|GO:0007018	Homo sapiens dynein, axonemal, heavy chain 12 (DNAH12), transcript variant 2, mRNA [NM_198564]	chr3:57483829-57483770	hs|3p14.3	Agilent_HUMAN_G3V2	NM_198564	chr3	57483770	57483829	-
LNCA_23_P84230	0.00017972	3.31511	mRNA	NM_032109	NM_032109	NM_032109	23440	Hs.202247	OTP	orthopedia homeobox	ENST00000306422	THC2477504	GO:0021985|GO:0000976|GO:0021879|GO:0021979|GO:0002052|GO:0007275|GO:0005634|GO:0007399	Homo sapiens orthopedia homeobox (OTP), mRNA [NM_032109]	chr5:76924844-76924785	hs|5q14.1	Agilent_HUMAN_G3V2	NM_032109	chr5	76924785	76924844	-
LNCA_33_P3281667	0.000659568	3.31406	mRNA	NM_001201380	NM_001201380	NM_001201380	728577	Hs.521495	CNTNAP3B	contactin associated protein-like 3B	ENST00000476961	THC2612854	GO:0007165|GO:0016020|GO:0005102|GO:0016021|GO:0007155	Homo sapiens contactin associated protein-like 3B (CNTNAP3B), mRNA [NM_001201380]	chr9:43920412-43920471	hs|9p11.2	Agilent_HUMAN_G3V2	NM_001201380	chr9	43920412	43920471	+
LNCA_23_P397391	0.00711359	3.30472	mRNA	NM_005306	NM_005306	NM_005306	2867	Hs.248056	FFAR2	free fatty acid receptor 2	ENST00000246549	THC2602861	GO:0007186|GO:0005886|GO:0005887|GO:0004930|GO:0004872|GO:0042995|GO:0004871|GO:0008289	Homo sapiens free fatty acid receptor 2 (FFAR2), mRNA [NM_005306]	chr19:35941189-35941248	hs|19q13.12	Agilent_HUMAN_G3V2	NM_005306	chr19	35941189	35941248	+
LNCA_23_P319423	0.0267667	3.28626	mRNA	NM_003740	NM_003740	NM_003740	8645	Hs.444448	KCNK5	potassium channel, subfamily K, member 5	ENST00000359534	THC2529678	GO:0007588|GO:0005244|GO:0016020|GO:0005887|GO:0005267|GO:0006813|GO:0071805|GO:0006811	Homo sapiens potassium channel, subfamily K, member 5 (KCNK5), mRNA [NM_003740]	chr6:39156880-39156821	hs|6p21.2	Agilent_HUMAN_G3V2	NM_003740	chr6	39156821	39156880	-
LNCA_32_P65706	0.00689391	3.28423	mRNA	ENST00000380683	NA	NA	NA	NA	NA	NA	ENST00000380683	THC2689639	NA	chromosome 9 open reading frame 92 [Source:HGNC Symbol;Acc:19054] [ENST00000380683]	chr9:16204018-16203959	hs|9p22.3	Agilent_HUMAN_G3V2	ENST00000380683	chr9	16203959	16204018	-
LNCA_33_P3555937	0.0278094	3.26897	mRNA	NM_001205315	NM_001205315	NM_001205315	79689	Hs.521008	STEAP4	STEAP family member 4	ENST00000301959	THC2475717	GO:0005794|GO:0005506|GO:0005886|GO:0050660|GO:0009055|GO:0055072|GO:0046872|GO:0000139|GO:0000166|GO:0016491|GO:0045444|GO:0016021|GO:0006811	Homo sapiens STEAP family member 4 (STEAP4), transcript variant 2, mRNA [NM_001205315]	chr7:87907978-87907919	hs|7q21.12	Agilent_HUMAN_G3V2	NM_001205315	chr7	87907919	87907978	-
LNCA_21_P0009920	0.00214271	3.26882	mRNA	ENST00000424662	NA	NA	NA	NA	XLOC_013822	NA	ENST00000424662	THC2624362	NA	ALU7_HUMAN (P39194) Alu subfamily SQ sequence contamination warning entry, partial (12%) [THC2624362]	chr20:57927338-57927279	hs|20q13.32	Agilent_HUMAN_G3V2	ENST00000424662	chr20	57927279	57927338	-
LNCA_33_P3365666	0.0452341	3.26648	mRNA	NA	NA	NA	NA	NA	NA	NA	NA	NA	NA	NA	chr7:076610569-076610628	hs|7q11.23	Agilent_HUMAN_G3V2	NA	chr7	76610569	76610628	+
LNCA_23_P75820	0.0033524	3.21139	mRNA	NM_001136506	NM_001136506	NM_001136506	283238	Hs.375139	SLC22A24	solute carrier family 22, member 24	ENST00000417740	NA	GO:0016020|GO:0016021|GO:0055085|GO:0006811	Homo sapiens solute carrier family 22, member 24 (SLC22A24), mRNA [NM_001136506]	chr11:62850856-62850797	hs|11q12.3	Agilent_HUMAN_G3V2	NM_001136506	chr11	62850797	62850856	-
LNCA_33_P3239614	0.0497555	3.2068	mRNA	NM_203395	NM_203395	NM_203395	389434	Hs.310225	IYD	iodotyrosine deiodinase	ENST00000392256	NP1457963	GO:0034641|GO:0005886|GO:0016491|GO:0042446|GO:0016021|GO:0055114	Homo sapiens iodotyrosine deiodinase (IYD), transcript variant 2, mRNA [NM_203395]	chr6:150715322-150715381	hs|6q25.1	Agilent_HUMAN_G3V2	NM_203395	chr6	150715322	150715381	+
LNCA_21_P0003770	4.19739e-05	3.19294	mRNA	THC2785091	NA	NA	NA	NA	XLOC_004069	NA	NA	THC2785091	NA	Q6XUN2_9PSED (Q6XUN2) Regulatory protein, partial (7%) [THC2785091]	NA	NA	Agilent_HUMAN_G3V2	THC2785091	NA	NA	NA	+
LNCA_24_P18105	0.00116526	3.19004	mRNA	NM_032466	NM_032466	NM_032466	444	Hs.332422	ASPH	aspartate beta-hydroxylase	ENST00000445642	THC2485235	GO:0007389|GO:0008285|GO:0042264|GO:0005783|GO:0004597|GO:0005509|GO:0009055|GO:0030176|GO:0008150|GO:0006936|GO:0060325|GO:0016020|GO:0005198|GO:0005488|GO:0018193|GO:0016491|GO:0005789|GO:0060021|GO:0016021|GO:0016702|GO:0008307|GO:0035108	Homo sapiens aspartate beta-hydroxylase (ASPH), transcript variant 3, mRNA [NM_032466]	chr8:62537754-62537695	hs|8q12.3	Agilent_HUMAN_G3V2	NM_032466	chr8	62537695	62537754	-
LNCA_21_P0010317	0.0417318	3.18992	mRNA	AI363183	NA	AI363183	NA	Hs.436151	XLOC_013986	NA	NA	NA	NA	qy68e03.x1 NCI_CGAP_Brn25 Homo sapiens cDNA clone IMAGE:2017180 3', mRNA sequence [AI363183]	chr21:47393601-47393660	hs|21q22.3	Agilent_HUMAN_G3V2	AI363183	chr21	47393601	47393660	+
LNCA_21_P0013387	0.0335456	3.16171	mRNA	ENST00000437494	NA	NA	NA	NA	XLOC_l2_013481	NA	ENST00000437494	THC2744915	NA	AF118270 muscle TFII-I repeat domain-containing protein 1 {Homo sapiens} (exp=-1; wgp=0; cg=0), partial (8%) [THC2744915]	chr7:75806406-75806465	hs|7q11.23	Agilent_HUMAN_G3V2	ENST00000437494	chr7	75806406	75806465	+
LNCA_23_P143774	0.0414856	3.15891	mRNA	NM_018995	NM_018995	NM_018995	54456	Hs.62880	MOV10L1	Mov10l1, Moloney leukemia virus 10-like 1, homolog (mouse)	ENST00000545383	THC2473678	GO:0005622|GO:0004004|GO:0000287|GO:0016787|GO:0000166|GO:0003723|GO:0004386|GO:0007275|GO:0007283|GO:0007281|GO:0005524	Homo sapiens Mov10l1, Moloney leukemia virus 10-like 1, homolog (mouse) (MOV10L1), transcript variant 1, mRNA [NM_018995]	chr22:50599418-50599477	hs|22q13.33	Agilent_HUMAN_G3V2	NM_018995	chr22	50599418	50599477	+
LNCERCC-00148_99	0.00265803	3.15539	mRNA	DQ883642	NA	NA	NA	NA	NA	NA	NA	NA	NA	NA	NA	NA	Agilent_HUMAN_G3V2	DQ883642	NA	NA	NA	+
LNCA_23_P14667	0.0106112	3.14432	mRNA	NM_004213	NM_004213	NM_004213	9154	Hs.459187	SLC28A1	solute carrier family 28 (sodium-coupled nucleoside transporter), member 1	ENST00000537624	THC2477017	GO:0016324|GO:0006139|GO:0005886|GO:0005887|GO:0005337|GO:0001882|GO:0015389|GO:0015858|GO:0005624|GO:0055086|GO:0055085	Homo sapiens solute carrier family 28 (sodium-coupled nucleoside transporter), member 1 (SLC28A1), transcript variant 1, mRNA [NM_004213]	chr15:85478730-85486715	hs|15q25.3	Agilent_HUMAN_G3V2	NM_004213	chr15	85478730	85486715	+
LNCA_21_P0011000	0.00070803	3.14292	mRNA	ENST00000444123	NA	BX093419	NA	Hs.127999	XLOC_l2_002477	NA	ENST00000444123	THC2740548	NA	BX093419 Soares_testis_NHT Homo sapiens cDNA clone IMAGp998K141785 ; IMAGE:727813, mRNA sequence [BX093419]	chr11:116523740-116528687	hs|11q23.3	Agilent_HUMAN_G3V2	ENST00000444123	chr11	116523740	116528687	+
LNCA_33_P3322499	0.0099721	3.13915	mRNA	NR_028594	NR_028594	NR_028594	401898	Hs.672384	ZNF833P	zinc finger protein 833, pseudogene	ENST00000344893	THC2478889	GO:0005622|GO:0008270|GO:0003676|GO:0046872	Homo sapiens zinc finger protein 833, pseudogene (ZNF833P), non-coding RNA [NR_028594]	chr19:11797275-11797334	hs|19p13.2	Agilent_HUMAN_G3V2	NR_028594	chr19	11797275	11797334	+
LNCA_23_P124300	0.0173706	3.13121	mRNA	NM_017429	NM_017429	NM_017429	53630	Hs.212172	BCMO1	beta-carotene 15,15'-monooxygenase 1	ENST00000425577	THC2475590	GO:0004497|GO:0001523|GO:0046872|GO:0008202|GO:0005829|GO:0003834	Homo sapiens beta-carotene 15,15'-monooxygenase 1 (BCMO1), mRNA [NM_017429]	chr16:81323976-81324035	hs|16q23.2	Agilent_HUMAN_G3V2	NM_017429	chr16	81323976	81324035	+
LNCA_33_P3303325	0.0294478	3.11754	mRNA	NA	NA	NA	NA	NA	NA	NA	NA	NA	NA	NA	chr1:022649480-022649421	hs|1p36.12	Agilent_HUMAN_G3V2	NA	chr1	22649421	22649480	-
LNCA_23_P398449	0.0312375	3.10789	mRNA	NR_028291	NR_028291	NR_028291	55350	Hs.183656	VNN3	vanin 3	ENST00000392394	THC2665159	GO:0017159|GO:0008150|GO:0006807|GO:0005886|GO:0031225|GO:0005575	Homo sapiens vanin 3 (VNN3), transcript variant 1, non-coding RNA [NR_028291]	chr6:133055517-133055458	hs|6q23.2	Agilent_HUMAN_G3V2	NR_028291	chr6	133055458	133055517	-
LNCA_23_P154643	0.00214865	3.10765	mRNA	NM_001719	NM_001719	NM_001719	655	Hs.473163	BMP7	bone morphogenetic protein 7	ENST00000395863	THC2493691	GO:0001656|GO:0005515|GO:0001657|GO:0034504|GO:0051216|GO:0001654|GO:0005615|GO:0048596|GO:0009880|GO:0048646|GO:0007411|GO:0060548|GO:0072040|GO:0009887|GO:0072136|GO:0010942|GO:0072134|GO:0072133|GO:0010664|GO:0045746|GO:0030501|GO:0001707|GO:0030509|GO:0045786|GO:0005125|GO:0060686|GO:0060687|GO:0045839|GO:0001501|GO:0001503|GO:0060272|GO:0060485|GO:0060389|GO:0045893|GO:0008083|GO:0040007|GO:…	Homo sapiens bone morphogenetic protein 7 (BMP7), mRNA [NM_001719]	chr20:55743844-55743791	hs|20q13.31	Agilent_HUMAN_G3V2	NM_001719	chr20	55743791	55743844	-
LNCA_23_P333022	0.0445778	3.09982	mRNA	NM_152990	NM_152990	NM_152990	222659	Hs.520097	PXT1	peroxisomal, testis specific 1	ENST00000454782	THC2486708	GO:0005777	Homo sapiens peroxisomal, testis specific 1 (PXT1), mRNA [NM_152990]	chr6:36358672-36358613	hs|6p21.31	Agilent_HUMAN_G3V2	NM_152990	chr6	36358613	36358672	-
LNCA_33_P3298349	0.0018577	3.09801	mRNA	NM_053017	NM_053017	NM_053017	116969	Hs.125680	ART5	ADP-ribosyltransferase 5	ENST00000397067	THC2490170	GO:0006471|GO:0016757|GO:0003956|GO:0005576	Homo sapiens ADP-ribosyltransferase 5 (ART5), transcript variant 1, mRNA [NM_053017]	chr11:3661305-3661246	hs|11p15.4	Agilent_HUMAN_G3V2	NM_053017	chr11	3661246	3661305	-
LNCA_23_P329924	0.00351911	3.09757	mRNA	NM_177551	NM_177551	NM_177551	338442	Hs.524812	HCAR2	hydroxycarboxylic acid receptor 2	ENST00000536970	THC2461513	GO:0001781|GO:0050995|GO:0070165|GO:0005886|GO:0045028|GO:0006915|GO:0004872|GO:0016021|GO:0004871|GO:0070553|GO:0033031	Homo sapiens hydroxycarboxylic acid receptor 2 (HCAR2), mRNA [NM_177551]	chr12:123187755-123187696	hs|12q24.31	Agilent_HUMAN_G3V2	NM_177551	chr12	123187696	123187755	-
LNCA_19_P00319509	0.0460612	3.07858	mRNA	NR_027104	NR_027104	NR_027104	NA	Hs.211125	LOC285401	uncharacterized LOC285401	NA	THC2612137	NA	Homo sapiens uncharacterized LOC285401 (LOC285401), non-coding RNA [NR_027104]	chr3:63109766-63109825	hs|3p14.2	Agilent_HUMAN_G3V2	NR_027104	chr3	63109766	63109825	+
LNCA_24_P7600	0.0474624	3.06675	mRNA	NM_012304	NM_012304	NM_012304	23194	Hs.433057	FBXL7	F-box and leucine-rich repeat protein 7	ENST00000329673	THC2478218	GO:0006511|GO:0004842|GO:0016567|GO:0000151	Homo sapiens F-box and leucine-rich repeat protein 7 (FBXL7), mRNA [NM_012304]	chr5:15937236-15937295	hs|5p15.1	Agilent_HUMAN_G3V2	NM_012304	chr5	15937236	15937295	+
LNCA_21_P0006139	6.41157e-05	3.06341	mRNA	BU568994	NA	BU568994	NA	Hs.621594	XLOC_007326	NA	NA	NA	NA	AGENCOURT_10400114 NIH_MGC_82 Homo sapiens cDNA clone IMAGE:6616301 5', mRNA sequence [BU568994]	chr9:33733179-33733238	hs|9p13.3	Agilent_HUMAN_G3V2	BU568994	chr9	33733179	33733238	+
LNCA_21_P0002743	0.0347255	3.05683	mRNA	ENST00000492683	NA	CR608703	NA	Hs.563143	XLOC_002664	NA	ENST00000492683	THC2611685	NA	full-length cDNA clone CS0DI083YM22 of Placenta Cot 25-normalized of Homo sapiens (human) [CR608703]	chr3:55333596-55333655	hs|3p14.3	Agilent_HUMAN_G3V2	ENST00000492683	chr3	55333596	55333655	+
LNCA_21_P0005010	0.000148705	3.05492	mRNA	ENST00000450310	NA	BM352801	NA	Hs.571125	XLOC_005633	NA	ENST00000450310	THC2679760	NA	ig67d02.y1 HR85 islet Homo sapiens cDNA 5', mRNA sequence [BM352801]	chr6:19749960-19749901	hs|6p22.3	Agilent_HUMAN_G3V2	ENST00000450310	chr6	19749901	19749960	-
LNCA_23_P213336	0.0307089	3.05482	mRNA	NM_000800	NM_000800	NM_000800	2246	Hs.483635	FGF1	fibroblast growth factor 1 (acidic)	ENST00000441680	THC2662054	GO:0005515|GO:0008286|GO:0008284|GO:0030324|GO:0005634|GO:0001759|GO:0005615|GO:0009653|GO:0030154|GO:0005829|GO:0034605|GO:0005737|GO:0045944|GO:0051781|GO:0005938|GO:0008201|GO:0050679|GO:0010740|GO:0030335|GO:0005730|GO:0005578|GO:0005576|GO:0005104|GO:0007275|GO:0045766|GO:0048155|GO:0045785|GO:0007399|GO:0007165|GO:0008543|GO:0001934|GO:0004713|GO:0008083|GO:0045542	Homo sapiens fibroblast growth factor 1 (acidic) (FGF1), transcript variant 1, mRNA [NM_000800]	chr5:141974871-141974812	hs|5q31.3	Agilent_HUMAN_G3V2	NM_000800	chr5	141974812	141974871	-
LNCA_33_P3333092	0.0112435	3.05253	mRNA	THC2675322	NA	NA	NA	NA	NA	NA	NA	THC2675322	NA	K1C19_CHICK (O93256) Keratin, type I cytoskeletal 19 (Cytokeratin-19) (CK-19) (Keratin-19) (K19) (GK-19), partial (12%) [THC2675322]	chr17:020426549-020426490	hs|17p11.2	Agilent_HUMAN_G3V2	THC2675322	chr17	20426490	20426549	-
LNCA_23_P108265	0.0134064	3.05203	mRNA	NM_012377	NM_012377	NM_012377	26658	Hs.589620	OR7C2	olfactory receptor, family 7, subfamily C, member 2	ENST00000248072	NP384510	GO:0004984|GO:0005886|GO:0004930|GO:0004872|GO:0016021|GO:0004871|GO:0050896	Homo sapiens olfactory receptor, family 7, subfamily C, member 2 (OR7C2), mRNA [NM_012377]	chr19:15052882-15052941	hs|19p13.12	Agilent_HUMAN_G3V2	NM_012377	chr19	15052882	15052941	+
LNCA_23_P38649	0.00290278	3.05154	mRNA	NM_000529	NM_000529	NM_000529	4158	Hs.248144	MC2R	melanocortin 2 receptor (adrenocorticotropic hormone)	ENST00000399821	THC2479118	GO:0005515|GO:0007186|GO:0005886|GO:0007187|GO:0005887|GO:0004930|GO:0030819|GO:0004978|GO:0004872|GO:0004871|GO:0004977	Homo sapiens melanocortin 2 receptor (adrenocorticotropic hormone) (MC2R), mRNA [NM_000529]	chr18:13884816-13884757	hs|18p11.21	Agilent_HUMAN_G3V2	NM_000529	chr18	13884757	13884816	-
LNCA_23_P19673	0.0201937	3.0408	mRNA	NM_005627	NM_005627	NM_005627	6446	Hs.510078	SGK1	serum/glucocorticoid regulated kinase 1	ENST00000367857	THC2495241	GO:0005886|GO:0005783|GO:0015459|GO:0032411|GO:0005634|GO:0001558|GO:0070294|GO:0051090|GO:0005737|GO:0000166|GO:0042127|GO:0060453|GO:0006814|GO:0030334|GO:0007616|GO:0005246|GO:0006950|GO:0042981|GO:0005524|GO:0050790|GO:0004674|GO:0008217|GO:0006468|GO:0017081|GO:0017080	Homo sapiens serum/glucocorticoid regulated kinase 1 (SGK1), transcript variant 1, mRNA [NM_005627]	chr6:134490715-134490656	hs|6q23.2	Agilent_HUMAN_G3V2	NM_005627	chr6	134490656	134490715	-
LNCA_33_P3289113	0.0368216	3.03328	mRNA	AK124809	NA	AK124809	1353	Hs.591171	COX11	COX11 cytochrome c oxidase assembly homolog (yeast)	NA	NP851030	GO:0005739|GO:0016020|GO:0008535|GO:0007585|GO:0005507|GO:0004129|GO:0005743|GO:0009055|GO:0016021	Homo sapiens cDNA FLJ42819 fis, clone BRCAN2015464. [AK124809]	chr17:53029524-53029465	hs|17q22	Agilent_HUMAN_G3V2	AK124809	chr17	53029465	53029524	-
LNCA_19_P00329511	0.0022493	3.03297	mRNA	NR_001564	NR_001564	NR_001564	NA	NA	XIST	X (inactive)-specific transcript (non-protein coding)	NA	THC2501975	NA	Homo sapiens X (inactive)-specific transcript (non-protein coding) (XIST), non-coding RNA [NR_001564]	chrX:73040747-73040688	hs|Xq13.2	Agilent_HUMAN_G3V2	NR_001564	chrX	73040688	73040747	-
LNCA_24_P228302	0.046222	3.01867	mRNA	NM_006890	NM_006890	NM_006890	1087	Hs.74466	CEACAM7	carcinoembryonic antigen-related cell adhesion molecule 7	ENST00000006724	THC2472446	GO:0005886|GO:0031225|GO:0016021	Homo sapiens carcinoembryonic antigen-related cell adhesion molecule 7 (CEACAM7), mRNA [NM_006890]	chr19:42178167-42178108	hs|19q13.2	Agilent_HUMAN_G3V2	NM_006890	chr19	42178108	42178167	-
LNCA_33_P3241090	0.0121357	3.01858	mRNA	NM_001005186	NM_001005186	NM_001005186	219952	Hs.690432	OR6Q1	olfactory receptor, family 6, subfamily Q, member 1	ENST00000302622	THC2611470	GO:0004984|GO:0005886|GO:0004930|GO:0004872|GO:0016021|GO:0004871|GO:0050896	Homo sapiens olfactory receptor, family 6, subfamily Q, member 1 (OR6Q1), mRNA [NM_001005186]	chr11:57799309-57799368	hs|11q12.1	Agilent_HUMAN_G3V2	NM_001005186	chr11	57799309	57799368	+
LNCA_33_P3367681	0.00887614	3.0156	mRNA	NA	NA	NA	NA	NA	NA	NA	NA	NA	NA	NA	chr11:108368688-108368747	hs|11q22.3	Agilent_HUMAN_G3V2	NA	chr11	108368688	108368747	+
LNCA_33_P3630780	0.00243183	3.01296	mRNA	AL833160	NA	AL833160	286058	Hs.638582	LOC286058	uncharacterized LOC286058	NA	THC2612486	NA	Homo sapiens mRNA; cDNA DKFZp686J2011 (from clone DKFZp686J2011). [AL833160]	chr8:22536609-22536550	hs|8p21.3	Agilent_HUMAN_G3V2	AL833160	chr8	22536550	22536609	-
LNCA_33_P3255229	0.0206786	2.98295	mRNA	BC066361	NA	BC066361	80854	Hs.480792	SETD7	SET domain containing (lysine methyltransferase) 7	ENST00000404104	THC2483721	GO:0005515|GO:0006355|GO:0005694|GO:0008168|GO:0034968|GO:0005634|GO:0018027|GO:0016279|GO:0018026|GO:0018024|GO:0002039|GO:0016740|GO:0016568	Homo sapiens cDNA clone IMAGE:5312439. [BC066361]	chr4:140453903-140453844	hs|4q31.1	Agilent_HUMAN_G3V2	BC066361	chr4	140453844	140453903	-
LNCA_21_P0006896	0.0396218	2.96835	mRNA	THC2683965	NA	NA	NA	NA	XLOC_008563	NA	NA	THC2683965	NA	Q8TAW2_HUMAN (Q8TAW2) CD99L2 protein, partial (39%) [THC2683965]	NA	NA	Agilent_HUMAN_G3V2	THC2683965	NA	NA	NA	+
LNCA_33_P3232080	0.00376081	2.96453	mRNA	NM_020406	NM_020406	NM_020406	57126	Hs.232165	CD177	CD177 molecule	ENST00000378012	THC2461749	GO:0005886|GO:0007596|GO:0031225|GO:0050900	Homo sapiens CD177 molecule (CD177), mRNA [NM_020406]	chr19:43857834-43857893	hs|19q13.31	Agilent_HUMAN_G3V2	NM_020406	chr19	43857834	43857893	+
LNCA_23_P162288	0.0106388	2.96186	mRNA	NM_005379	NM_005379	NM_005379	4640	Hs.5394	MYO1A	myosin IA	ENST00000544473	THC2473768	GO:0005516|GO:0030033|GO:0007605|GO:0003779|GO:0016459|GO:0005524|GO:0016328|GO:0005903|GO:0005902|GO:0016323|GO:0003774|GO:0005737|GO:0016324|GO:0031941|GO:0009925|GO:0000166|GO:0030030|GO:0051648|GO:0030864	Homo sapiens myosin IA (MYO1A), mRNA [NM_005379]	chr12:57422474-57422415	hs|12q13.3	Agilent_HUMAN_G3V2	NM_005379	chr12	57422415	57422474	-
LNCA_33_P3412375	0.0457318	2.9446	mRNA	AK124996	NA	AK124996	NA	Hs.707548	NA	NA	NA	THC2488548	NA	Homo sapiens cDNA FLJ43006 fis, clone BRTHA2013707. [AK124996]	chr10:27389993-27390053	hs|10p12.1	Agilent_HUMAN_G3V2	AK124996	chr10	27389993	27390053	+
LNCA_33_P3246448	0.0117566	2.93985	mRNA	NM_080671	NM_080671	NM_080671	23704	Hs.348522	KCNE4	potassium voltage-gated channel, Isk-related family, member 4	ENST00000281830	THC2655788	GO:0016324|GO:0005244|GO:0016020|GO:0005249|GO:0016021|GO:0006813|GO:0006811	Homo sapiens potassium voltage-gated channel, Isk-related family, member 4 (KCNE4), mRNA [NM_080671]	chr2:223920197-223920256	hs|2q36.1	Agilent_HUMAN_G3V2	NM_080671	chr2	223920197	223920256	+
LNCA_23_P114947	0.00637122	2.93197	mRNA	NM_002923	NM_002923	NM_002923	5997	Hs.78944	RGS2	regulator of G-protein signaling 2, 24kDa	ENST00000235382	THC2468539	GO:0005516|GO:0045744|GO:0005886|GO:0005730|GO:0005634|GO:0010519|GO:0006417|GO:0005829|GO:0043547|GO:0005739|GO:0010614|GO:0005737|GO:0007049|GO:0008277|GO:0060452|GO:0050873|GO:0043407|GO:0009898|GO:0055119|GO:0004871|GO:0071877|GO:0005096	Homo sapiens regulator of G-protein signaling 2, 24kDa (RGS2), mRNA [NM_002923]	chr1:192781051-192781110	hs|1q31.2	Agilent_HUMAN_G3V2	NM_002923	chr1	192781051	192781110	+
LNCA_21_P0002436	0.0441	2.93177	mRNA	THC2542907	NA	NA	NA	NA	XLOC_002081	NA	NA	THC2542907	NA	HSU81984 endothelial PAS domain protein 1 {Homo sapiens} (exp=-1; wgp=0; cg=0), partial (5%) [THC2542907]	chr2:046520974-046520915	hs|2p21	Agilent_HUMAN_G3V2	THC2542907	chr2	46520915	46520974	-
LNCA_23_P23048	0.00985461	2.92032	mRNA	NM_002965	NM_002965	NM_002965	6280	Hs.112405	S100A9	S100 calcium binding protein A9	ENST00000368738	THC2593706	GO:0005515|GO:0031532|GO:0005886|GO:0030595|GO:0045471|GO:0045113|GO:0005509|GO:0007267|GO:0005730|GO:0005576|GO:0005634|GO:0002544|GO:0010043|GO:0005615|GO:0007165|GO:0005737|GO:0006954|GO:0006935|GO:0032496|GO:0004871|GO:0005856	Homo sapiens S100 calcium binding protein A9 (S100A9), mRNA [NM_002965]	chr1:153330874-153333143	hs|1q21.3	Agilent_HUMAN_G3V2	NM_002965	chr1	153330874	153333143	+
LNCA_33_P3396389	0.00647815	2.91612	mRNA	NM_000877	NM_000877	NM_000877	3554	Hs.701982	IL1R1	interleukin 1 receptor, type I	ENST00000413623	THC2627052	GO:0005515|GO:0009986|GO:0005886|GO:0071731|GO:0002020|GO:0005161|GO:0004909|GO:0005622|GO:0006955|GO:0016020|GO:0005887|GO:0045087|GO:0004908|GO:0004872|GO:0004871|GO:0070555|GO:0070498|GO:0030728|GO:0007166|GO:0004888	Homo sapiens interleukin 1 receptor, type I (IL1R1), mRNA [NM_000877]	chr2:102792046-102792105	hs|2q12.1	Agilent_HUMAN_G3V2	NM_000877	chr2	102792046	102792105	+
LNCA_23_P110712	0.0354117	2.89283	mRNA	NM_004417	NM_004417	NM_004417	1843	Hs.171695	DUSP1	dual specificity phosphatase 1	ENST00000457103	THC2528308	GO:0005515|GO:0042542|GO:0005634|GO:0051591|GO:0032870|GO:0000188|GO:0035556|GO:0006470|GO:0009416|GO:0032526|GO:0006979|GO:0032355|GO:0017017|GO:0004726|GO:0001706|GO:0043065|GO:0008330|GO:0005625|GO:0042981|GO:0051384|GO:0033574|GO:0045768|GO:0051592|GO:0007049|GO:0016787|GO:0005654	Homo sapiens dual specificity phosphatase 1 (DUSP1), mRNA [NM_004417]	chr5:172195355-172195296	hs|5q35.1	Agilent_HUMAN_G3V2	NM_004417	chr5	172195296	172195355	-
LNCA_32_P108254	0.0188464	2.8908	mRNA	NM_017565	NM_017565	NM_017565	54757	Hs.268874	FAM20A	family with sequence similarity 20, member A	ENST00000375556	THC2476784	GO:0005576	Homo sapiens family with sequence similarity 20, member A (FAM20A), transcript variant 1, mRNA [NM_017565]	chr17:66533427-66533368	hs|17q24.2	Agilent_HUMAN_G3V2	NM_017565	chr17	66533368	66533427	-
LNCA_21_P0014020	0.039323	2.86449	mRNA	XM_003403492	XM_003403492	XM_003403492	NA	Hs.640062	LOC100652894	uncharacterized protein LOC100652894	NA	THC2618814	NA	PREDICTED: Homo sapiens hypothetical protein LOC100652894 (LOC100652894), mRNA [XM_003403492]	chr22:24530404-24530345	hs|22q11.23	Agilent_HUMAN_G3V2	XM_003403492	chr22	24530345	24530404	-
LNCA_23_P159721	0.000397301	2.86312	mRNA	NM_004224	NM_004224	NM_004224	9248	Hs.567390	GPR50	G protein-coupled receptor 50	ENST00000218316	NP830980	GO:0007186|GO:0005886|GO:0005887|GO:0004930|GO:0007267|GO:0004872|GO:0008502|GO:0004871	Homo sapiens G protein-coupled receptor 50 (GPR50), mRNA [NM_004224]	chrX:150348977-150349036	hs|Xq28	Agilent_HUMAN_G3V2	NM_004224	chrX	150348977	150349036	+
LNCA_33_P3254078	0.00326222	2.86103	mRNA	ENST00000471669	NA	NA	55064	NA	C9orf68	chromosome 9 open reading frame 68	ENST00000471669	THC2673257	NA	chromosome 9 open reading frame 68 [Source:HGNC Symbol;Acc:25472] [ENST00000471669]	chr9:4646358-4646299	hs|9p24.1	Agilent_HUMAN_G3V2	ENST00000471669	chr9	4646299	4646358	-
LNCA_23_P89649	0.00693288	2.84892	mRNA	NM_033185	NM_033185	NM_033185	85293	Hs.662759	KRTAP3-3	keratin associated protein 3-3	ENST00000391586	THC2485385	GO:0005198|GO:0045095	Homo sapiens keratin associated protein 3-3 (KRTAP3-3), mRNA [NM_033185]	chr17:39149786-39149727	hs|17q21.2	Agilent_HUMAN_G3V2	NM_033185	chr17	39149727	39149786	-
LNCA_33_P3329765	0.0048516	2.84104	mRNA	ENST00000434611	NA	NA	NA	NA	NA	NA	ENST00000434611	THC2745520	NA	NA	chr2:59522591-59522532	hs|2p16.1	Agilent_HUMAN_G3V2	ENST00000434611	chr2	59522532	59522591	-
LNCA_23_P399255	0.0290719	2.8409	mRNA	NM_152737	NM_152737	NM_152737	221687	Hs.111164	RNF182	ring finger protein 182	ENST00000544682	THC2465063	GO:0005515|GO:0005737|GO:0004842|GO:0016567|GO:0016020|GO:0016874|GO:0008270|GO:0016021|GO:0046872|GO:0043231	Homo sapiens ring finger protein 182 (RNF182), transcript variant 2, mRNA [NM_152737]	chr6:13979997-13980056	hs|6p23	Agilent_HUMAN_G3V2	NM_152737	chr6	13979997	13980056	+
LNCA_33_P3264965	0.00215118	2.82422	mRNA	ENST00000423907	NA	NA	NA	NA	NA	NA	ENST00000423907	THC2684041	NA	NA	chr1:116966438-116966379	hs|1p13.1	Agilent_HUMAN_G3V2	ENST00000423907	chr1	116966379	116966438	-
LNCA_33_P3217619	0.0161843	2.81446	mRNA	ENST00000552290	NA	NA	NA	NA	NA	NA	ENST00000552290	NA	NA	NA	chr12:76083366-76083307	hs|12q21.2	Agilent_HUMAN_G3V2	ENST00000552290	chr12	76083307	76083366	-
LNCA_33_P3259228	0.0347773	2.80459	mRNA	ENST00000376458	XR_108964	XR_108964	NA	Hs.584122	NA	NA	ENST00000376458	THC2499625	NA	family with sequence similarity 75, member B [Source:HGNC Symbol;Acc:31411] [ENST00000376458]	chr9:84675728-84675669	hs|9q21.32	Agilent_HUMAN_G3V2	ENST00000376458	chr9	84675669	84675728	-
LNCA_23_P101521	0.0353414	2.8014	mRNA	NM_152358	NM_152358	NM_152358	126123	Hs.414175	IZUMO2	IZUMO family member 2	ENST00000486050	THC2487140	GO:0016020|GO:0016021	Homo sapiens IZUMO family member 2 (IZUMO2), mRNA [NM_152358]	chr19:50657886-50655879	hs|19q13.33	Agilent_HUMAN_G3V2	NM_152358	chr19	50655879	50657886	-
LNCA_24_P382287	0.0161106	2.79137	mRNA	NM_004361	NM_004361	NM_004361	1005	Hs.657522	CDH7	cadherin 7, type 2	ENST00000397968	THC2483789	GO:0016337|GO:0005886|GO:0034329|GO:0005509|GO:0016021|GO:0007156|GO:0045216|GO:0034332	Homo sapiens cadherin 7, type 2 (CDH7), transcript variant b, mRNA [NM_004361]	chr18:63529955-63530014	hs|18q22.1	Agilent_HUMAN_G3V2	NM_004361	chr18	63529955	63530014	+
LNCA_33_P3405769	0.0246263	2.7869	mRNA	NM_001135686	NM_001135686	NM_001135686	441864	Hs.694674	TARM1	T cell-interacting, activating receptor on myeloid cells 1	ENST00000432826	NA	GO:0016020|GO:0016021	Homo sapiens T cell-interacting, activating receptor on myeloid cells 1 (TARM1), mRNA [NM_001135686]	chr19:54573325-54573266	hs|19q13.42	Agilent_HUMAN_G3V2	NM_001135686	chr19	54573266	54573325	-
LNCA_21_P0002866	0.0211908	2.77951	mRNA	ENST00000484675	NA	BM929797	NA	Hs.495811	XLOC_003190	NA	ENST00000484675	THC2652332	NA	UI-E-EJ1-ajj-n-21-0-UI.r1 UI-E-EJ1 Homo sapiens cDNA clone UI-E-EJ1-ajj-n-21-0-UI 5', mRNA sequence [BM929797]	chr3:99226108-99226049	hs|3q12.1	Agilent_HUMAN_G3V2	ENST00000484675	chr3	99226049	99226108	-
LNCA_21_P0013027	0.0107163	2.77924	mRNA	ENST00000431554	NA	AK056584	NA	Hs.453592	XLOC_l2_012584	NA	ENST00000431554	THC2491736	NA	NA	chr6:53847610-53859608	hs|6p12.1	Agilent_HUMAN_G3V2	ENST00000431554	chr6	53847610	53859608	+
LNCA_21_P0010191	0.0297176	2.77624	mRNA	ENST00000446404	NA	BG221633	NA	Hs.574849	XLOC_014031	NA	ENST00000446404	NA	NA	RST41447 Athersys RAGE Library Homo sapiens cDNA, mRNA sequence [BG221633]	chr21:26259159-26259100	hs|21q21.2	Agilent_HUMAN_G3V2	ENST00000446404	chr21	26259100	26259159	-
LNCA_33_P3215392	0.0133211	2.76852	mRNA	NM_138568	NM_138568	NM_138568	90332	Hs.337557	EXOC3L2	exocyst complex component 3-like 2	ENST00000413988	THC2480663	GO:0008150|GO:0003674|GO:0005575	Homo sapiens exocyst complex component 3-like 2 (EXOC3L2), mRNA [NM_138568]	chr19:45716229-45716170	hs|19q13.32	Agilent_HUMAN_G3V2	NM_138568	chr19	45716170	45716229	-
LNCA_23_P322395	0.0361709	2.75004	mRNA	NM_182572	NM_182572	NM_182572	284312	Hs.643437	ZSCAN1	zinc finger and SCAN domain containing 1	ENST00000282326	NA	GO:0005622|GO:0003700|GO:0016032|GO:0008270|GO:0005634|GO:0003677|GO:0046872	Homo sapiens zinc finger and SCAN domain containing 1 (ZSCAN1), mRNA [NM_182572]	chr19:58565691-58565750	hs|19q13.43	Agilent_HUMAN_G3V2	NM_182572	chr19	58565691	58565750	+
LNCA_24_P204819	0.00472472	2.74615	mRNA	NM_005840	NM_005840	NM_005840	10251	Hs.381912	SPRY3	sprouty homolog 3 (Drosophila)	ENST00000302805	THC2484415	GO:0003674|GO:0005737|GO:0016020|GO:0007275|GO:0009966	Homo sapiens sprouty homolog 3 (Drosophila) (SPRY3), mRNA [NM_005840]	chrY:59106929-59106988	hs|Yq12	Agilent_HUMAN_G3V2	NM_005840	chrY	59106929	59106988	+
LNCA_23_P50638	0.0459596	2.73879	mRNA	NM_052972	NM_052972	NM_052972	116844	Hs.655559	LRG1	leucine-rich alpha-2-glycoprotein 1	ENST00000306390	THC2464995	GO:0008150|GO:0003674|GO:0016020|GO:0050873|GO:0005576	Homo sapiens leucine-rich alpha-2-glycoprotein 1 (LRG1), mRNA [NM_052972]	chr19:4537515-4537456	hs|19p13.3	Agilent_HUMAN_G3V2	NM_052972	chr19	4537456	4537515	-
LNCA_23_P365725	0.0343848	2.72787	mRNA	NM_147199	NM_147199	NM_147199	259249	Hs.711459	MRGPRX1	MAS-related GPR, member X1	ENST00000302797	THC2756398	GO:0005886|GO:0004930|GO:0004872|GO:0016021|GO:0006953|GO:0004871	Homo sapiens MAS-related GPR, member X1 (MRGPRX1), mRNA [NM_147199]	chr11:18956050-18955991	hs|11p15.1	Agilent_HUMAN_G3V2	NM_147199	chr11	18955991	18956050	-
LNCA_33_P3359771	0.0314262	2.72537	mRNA	NM_000702	NM_000702	NM_000702	477	Hs.34114	ATP1A2	ATPase, Na+/K+ transporting, alpha 2 polypeptide	ENST00000392233	THC2492056	GO:0043005|GO:0008344|GO:0005886|GO:0015077|GO:0045202|GO:0006942|GO:0006940|GO:0046872|GO:0019229|GO:0015662|GO:0040011|GO:0005737|GO:0002087|GO:0006754|GO:0034220|GO:0043197|GO:0000166|GO:0045988|GO:0016820|GO:0006814|GO:0045822|GO:0006813|GO:0005391|GO:0005792|GO:0051481|GO:0005624|GO:0005890|GO:0055085|GO:0005524|GO:0042383|GO:0019829|GO:0016787|GO:0002026|GO:0005901|GO:0008542|GO:0001504|GO:…	Homo sapiens ATPase, Na+/K+ transporting, alpha 2 polypeptide (ATP1A2), mRNA [NM_000702]	chr1:160111276-160111335	hs|1q23.2	Agilent_HUMAN_G3V2	NM_000702	chr1	160111276	160111335	+
LNCA_23_P394043	9.50416e-05	2.72166	mRNA	NM_001080429	NM_001080429	NM_001080429	57662	Hs.17686	CAMSAP3	calmodulin regulated spectrin-associated protein family, member 3	ENST00000446248	NP1134247	GO:0090136|GO:0070507|GO:0005915|GO:0005737|GO:0030054|GO:0034453|GO:0005912|GO:0010923|GO:0051011|GO:0005874|GO:0045218|GO:0005856	Homo sapiens calmodulin regulated spectrin-associated protein family, member 3 (CAMSAP3), transcript variant 1, mRNA [NM_001080429]	chr19:7682432-7682491	hs|19p13.2	Agilent_HUMAN_G3V2	NM_001080429	chr19	7682432	7682491	+
LNCA_33_P3255056	0.0256328	2.71933	mRNA	NA	NA	NA	NA	NA	NA	NA	NA	NA	NA	NA	chr7:156290515-156290456	hs|7q36.3	Agilent_HUMAN_G3V2	NA	chr7	156290456	156290515	-
LNCA_19_P00806883	0.0416869	2.70082	mRNA	AK054822	NA	AK054822	NA	NA	Q4TAJ0	NA	ENST00000401499	THC2510734	NA	Q4TAJ0_TETNG (Q4TAJ0) Chromosome undetermined SCAF7304, whole genome shotgun sequence. (Fragment), partial (8%) [THC2510734]	chr7:155188745-155188804	hs|7q36.3	Agilent_HUMAN_G3V2	AK054822	chr7	155188745	155188804	+
LNCA_33_P3330120	0.0330777	2.69472	mRNA	ENST00000447909	NA	NA	NA	NA	NA	NA	ENST00000447909	THC2722578	NA	NA	chr20:60313736-60313677	hs|20q13.33	Agilent_HUMAN_G3V2	ENST00000447909	chr20	60313677	60313736	-
LNCA_23_P346291	0.013991	2.69103	mRNA	NM_018969	NM_018969	NM_018969	54328	Hs.193011	GPR173	G protein-coupled receptor 173	ENST00000332582	THC2477035	GO:0007165|GO:0007186|GO:0005886|GO:0004930|GO:0004872|GO:0016021|GO:0004871	Homo sapiens G protein-coupled receptor 173 (GPR173), mRNA [NM_018969]	chrX:53106775-53106834	hs|Xp11.22	Agilent_HUMAN_G3V2	NM_018969	chrX	53106775	53106834	+
LNCA_21_P0008538	0.00544081	2.6902	mRNA	BX648502	NA	BX648502	NA	Hs.254789	XLOC_011047	NA	NA	THC2533854	NA	Q2NUU5_SODGM (Q2NUU5) Glutamate-aspartate ABC transporter ATP-binding component GltL, partial (7%) [THC2533854]	chr14:62031907-62031848	hs|14q23.1	Agilent_HUMAN_G3V2	BX648502	chr14	62031848	62031907	-
LNCA_23_P409449	0.00363194	2.68975	mRNA	NM_005421	NM_005421	NM_005421	6887	Hs.247978	TAL2	T-cell acute lymphocytic leukemia 2	ENST00000334077	THC2701934	GO:0021794|GO:0006355|GO:0035264|GO:0007610|GO:0030901|GO:0009791|GO:0003677	Homo sapiens T-cell acute lymphocytic leukemia 2 (TAL2), mRNA [NM_005421]	chr9:108424910-108424969	hs|9q31.2	Agilent_HUMAN_G3V2	NM_005421	chr9	108424910	108424969	+
LNCA_23_P73097	0.0281124	2.68785	mRNA	NM_170587	NM_170587	NM_170587	8601	Hs.730836	RGS20	regulator of G-protein signaling 20	ENST00000276500	NP1213704	GO:0043547|GO:0005737|GO:0008277|GO:0005886|GO:0005634|GO:0009968|GO:0004871|GO:0005096	Homo sapiens regulator of G-protein signaling 20 (RGS20), transcript variant 1, mRNA [NM_170587]	chr8:54871444-54871503	hs|8q11.23	Agilent_HUMAN_G3V2	NM_170587	chr8	54871444	54871503	+
LNCA_23_P38795	0.00342301	2.6815	mRNA	NM_002029	NM_002029	NM_002029	2357	Hs.753	FPR1	formyl peptide receptor 1	ENST00000304748	THC2464363	GO:0005886|GO:0007263|GO:0004930|GO:0006928|GO:0004982|GO:0000187|GO:0007165|GO:0006935|GO:0007186|GO:0004872|GO:0007188|GO:0016021|GO:0004871|GO:0005768	Homo sapiens formyl peptide receptor 1 (FPR1), transcript variant 2, mRNA [NM_002029]	chr19:52249233-52249174	hs|19q13.41	Agilent_HUMAN_G3V2	NM_002029	chr19	52249174	52249233	-
LNCA_23_P150281	0.00380637	2.68006	mRNA	NM_001076787	NM_001076787	NM_001076787	9537	Hs.554791	TP53I11	tumor protein p53 inducible protein 11	ENST00000533940	THC2788524	GO:0008285|GO:0016020|GO:0006950|GO:0016021	Homo sapiens tumor protein p53 inducible protein 11 (TP53I11), mRNA [NM_001076787]	chr11:44954519-44954460	hs|11p11.2	Agilent_HUMAN_G3V2	NM_001076787	chr11	44954460	44954519	-
LNCA_21_P0010172	0.00796784	2.67915	mRNA	ENST00000435738	NA	AJ003403	NA	Hs.447979	XLOC_013989	NA	ENST00000435738	NA	NA	AJ003403 Selected chromosome 21 cDNA library Homo sapiens cDNA clone MPIpl1-3J5, mRNA sequence [AJ003403]	chr21:47477422-47477481	hs|21q22.3	Agilent_HUMAN_G3V2	ENST00000435738	chr21	47477422	47477481	+
LNCA_33_P3370449	0.0340139	2.67584	mRNA	NM_152413	NM_152413	NM_152413	137362	Hs.380740	GOT1L1	glutamic-oxaloacetic transaminase 1-like 1	ENST00000307599	THC2482697	GO:0006520|GO:0005737|GO:0009058|GO:0030170|GO:0008483	Homo sapiens glutamic-oxaloacetic transaminase 1-like 1 (GOT1L1), mRNA [NM_152413]	chr8:37794872-37794813	hs|8p11.23	Agilent_HUMAN_G3V2	NM_152413	chr8	37794813	37794872	-
LNCA_33_P3295091	0.000625911	2.66908	mRNA	NR_024236	NR_024236	NR_024236	400804	Hs.722626	C1orf140	uncharacterized LOC400804	NA	NA	NA	Homo sapiens uncharacterized LOC400804 (C1orf140), non-coding RNA [NR_024236]	chr1:221503329-221503270	hs|1q41	Agilent_HUMAN_G3V2	NR_024236	chr1	221503270	221503329	-
LNCA_21_P0012973	0.00685535	2.66758	mRNA	ENST00000507435	NA	CD110012	NA	Hs.481511	XLOC_l2_011922	NA	ENST00000507435	THC2630342	NA	AGENCOURT_13890273 NIH_MGC_147 Homo sapiens cDNA clone IMAGE:30346469 5', mRNA sequence [CD110012]	chr5:4481855-4452159	hs|5p15.33	Agilent_HUMAN_G3V2	ENST00000507435	chr5	4452159	4481855	-
LNCA_33_P3252800	0.0034415	2.66685	mRNA	NM_002849	NM_002849	NM_002849	5801	Hs.506076	PTPRR	protein tyrosine phosphatase, receptor type, R	ENST00000549107	NP091230	GO:0048471|GO:0005794|GO:0019901|GO:0005886|GO:0009986|GO:0005634|GO:0001701|GO:0035335|GO:0007399|GO:0005737|GO:0006470|GO:0016787|GO:0005001|GO:0030182|GO:0004872|GO:0016021|GO:0004725	Homo sapiens protein tyrosine phosphatase, receptor type, R (PTPRR), transcript variant 1, mRNA [NM_002849]	chr12:71050544-71050485	hs|12q15	Agilent_HUMAN_G3V2	NM_002849	chr12	71050485	71050544	-
LNCA_19_P00320362	0.0329314	2.66524	mRNA	NR_034143	NR_034143	NR_034143	NA	Hs.730673	LOC729177	uncharacterized LOC729177	NA	THC2510121	NA	Homo sapiens uncharacterized LOC729177 (LOC729177), non-coding RNA [NR_034143]	chr6:22136652-22136593	hs|6p22.3	Agilent_HUMAN_G3V2	NR_034143	chr6	22136593	22136652	-
LNCA_23_P106194	0.00316511	2.66363	mRNA	NM_005252	NM_005252	NM_005252	2353	Hs.728079	FOS	FBJ murine osteosarcoma viral oncogene homolog	ENST00000303562	THC2544585	GO:0005515|GO:0014070|GO:0003700|GO:0006366|GO:0044212|GO:0009409|GO:0051403|GO:0051591|GO:0002756|GO:0003690|GO:0002755|GO:0031668|GO:0032496|GO:0046983|GO:0009416|GO:0007179|GO:0001661|GO:0019717|GO:0051412|GO:0007565|GO:0034130|GO:0034134|GO:0007568|GO:0009636|GO:0030431|GO:0002224|GO:0009629|GO:0045087|GO:0032570|GO:0005654|GO:0045893|GO:0034142|GO:0005634|GO:0060395|GO:0032870|GO:0051090|GO:…	Homo sapiens FBJ murine osteosarcoma viral oncogene homolog (FOS), mRNA [NM_005252]	chr14:75748214-75748273	hs|14q24.3	Agilent_HUMAN_G3V2	NM_005252	chr14	75748214	75748273	+
LNCA_21_P0001238	0.0147317	2.66206	mRNA	ENST00000450783	NA	NA	NA	NA	XLOC_001257	NA	ENST00000450783	THC2540869	NA	NA	chr1:231663140-231658381	hs|1q42.2	Agilent_HUMAN_G3V2	ENST00000450783	chr1	231658381	231663140	-
LNCA_33_P3275055	0.00654063	2.66163	mRNA	NM_001160011	NM_001160011	NM_001160011	256435	Hs.337040	ST6GALNAC3	ST6 (alpha-N-acetyl-neuraminyl-2,3-beta-galactosyl-1,3)-N-acetylgalactosaminide alpha-2,6-sialyltransferase 3	ENST00000394994	THC2487252	GO:0006677|GO:0030173|GO:0009100|GO:0008373|GO:0005794|GO:0016020|GO:0006687|GO:0000139|GO:0006486|GO:0016021	Homo sapiens ST6 (alpha-N-acetyl-neuraminyl-2,3-beta-galactosyl-1,3)-N-acetylgalactosaminide alpha-2,6-sialyltransferase 3 (ST6GALNAC3), transcript variant 2, mRNA [NM_001160011]	chr1:76878040-76878099	hs|1p31.1	Agilent_HUMAN_G3V2	NM_001160011	chr1	76878040	76878099	+
LNCA_32_P212373	0.0142954	2.65502	mRNA	ENST00000425412	NA	NA	NA	NA	NA	NA	ENST00000425412	NA	NA	NA	chr1:231664197-231663134	hs|1q42.2	Agilent_HUMAN_G3V2	ENST00000425412	chr1	231663134	231664197	-
LNCA_33_P3221718	0.0037301	2.65489	mRNA	AK127907	NA	AK127907	100129373	Hs.689478	LOC100129373	uncharacterized LOC100129373	NA	THC2485866	NA	Homo sapiens cDNA FLJ46014 fis, clone SPLEN2011252. [AK127907]	chrX:149910005-149910064	hs|Xq28	Agilent_HUMAN_G3V2	AK127907	chrX	149910005	149910064	+
LNCA_21_P0001239	0.0175467	2.651	mRNA	ENST00000450783	NA	NA	NA	NA	XLOC_001257	NA	ENST00000450783	THC2540869	NA	NA	chr1:231663139-231658380	hs|1q42.2	Agilent_HUMAN_G3V2	ENST00000450783	chr1	231658380	231663139	-
LNCA_33_P3739870	0.00391675	2.64871	mRNA	AK055745	NA	AK055745	401225	Hs.473947	FLJ31183	uncharacterized LOC401225	NA	THC2627251	NA	Homo sapiens cDNA FLJ31183 fis, clone KIDNE2000317. [AK055745]	chr5:178365737-178365678	hs|5q35.3	Agilent_HUMAN_G3V2	AK055745	chr5	178365678	178365737	-
LNCA_21_P0011872	0.00811189	2.64781	mRNA	ENST00000412982	NA	NA	NA	NA	SPEG	SPEG complex locus	ENST00000412982	THC2520003	GO:0042692|GO:0008285|GO:0007517|GO:0000166|GO:0004674|GO:0005634|GO:0005524	Q9EQJ5_MOUSE (Q9EQJ5) Striated muscle-specific serine/threonine protein kinase, partial (7%) [THC2520003]	chr2:220362450-220362509	hs|2q35	Agilent_HUMAN_G3V2	ENST00000412982	chr2	220362450	220362509	+
LNCA_33_P3285945	0.00161737	2.64679	mRNA	NM_002989	NM_002989	NM_002989	6366	Hs.57907	CCL21	chemokine (C-C motif) ligand 21	ENST00000259607	THC2463421	GO:0051897|GO:0031295|GO:0007267|GO:0046330|GO:0051491|GO:0005615|GO:2000147|GO:0097026|GO:0031529|GO:0006955|GO:0006954|GO:0050921|GO:0030838|GO:0034695|GO:0043552|GO:0045860|GO:0031274|GO:0048469|GO:0070374|GO:0043123|GO:0008009|GO:0001771|GO:0051209|GO:2000529|GO:0002407|GO:0033630|GO:0005576|GO:0032862|GO:0002606|GO:0010560|GO:2000107|GO:0048260|GO:0090023|GO:0001768|GO:0035759|GO:0001954|GO:…	Homo sapiens chemokine (C-C motif) ligand 21 (CCL21), mRNA [NM_002989]	chr9:34709062-34709003	hs|9p13.3	Agilent_HUMAN_G3V2	NM_002989	chr9	34709003	34709062	-
LNCA_23_P75749	0.00755023	2.63219	mRNA	NM_201648	NM_201648	NM_201648	10249	Hs.145384	GLYAT	glycine-N-acyltransferase	ENST00000529732	THC2472005	GO:0005739|GO:0006637|GO:0016746|GO:0006805|GO:0047961|GO:0005759|GO:0009636	Homo sapiens glycine-N-acyltransferase (GLYAT), nuclear gene encoding mitochondrial protein, transcript variant 1, mRNA [NM_201648]	chr11:58477332-58477273	hs|11q12.1	Agilent_HUMAN_G3V2	NM_201648	chr11	58477273	58477332	-
LNCA_21_P0006753	0.0050174	2.62829	mRNA	ENST00000437014	NA	BU146091	NA	Hs.568802	XLOC_008794	NA	ENST00000437014	THC2631837	NA	AGENCOURT_8058623 NIH_MGC_102 Homo sapiens cDNA clone IMAGE:6213075 5', mRNA sequence [BU146091]	chr10:44755392-44755333	hs|10q11.21	Agilent_HUMAN_G3V2	ENST00000437014	chr10	44755333	44755392	-
LNCA_23_P137035	0.0381333	2.61852	mRNA	NM_003662	NM_003662	NM_003662	8544	Hs.495728	PIR	pirin (iron-binding nuclear protein)	ENST00000380421	THC2496239	GO:0005515|GO:0003712|GO:0005737|GO:0006366|GO:0016491|GO:0008127|GO:0005634|GO:0046872	Homo sapiens pirin (iron-binding nuclear protein) (PIR), transcript variant 1, mRNA [NM_003662]	chrX:15403117-15403058	hs|Xp22.2	Agilent_HUMAN_G3V2	NM_003662	chrX	15403058	15403117	-
LNCA_23_P31407	0.000725095	2.59177	mRNA	NM_006408	NM_006408	NM_006408	10551	Hs.530009	AGR2	anterior gradient 2 homolog (Xenopus laevis)	ENST00000412973	THC2651635	GO:0070254|GO:0005739|GO:0005515|GO:0002163|GO:0005783|GO:0005576	Homo sapiens anterior gradient homolog 2 (Xenopus laevis) (AGR2), mRNA [NM_006408]	chr7:16839382-16837274	hs|7p21.1	Agilent_HUMAN_G3V2	NM_006408	chr7	16837274	16839382	-
LNCA_32_P143000	0.039708	2.59101	mRNA	NM_015307	NM_015307	NM_015307	23359	Hs.383564	FAM189A1	family with sequence similarity 189, member A1	ENST00000261275	THC2648289	GO:0016020|GO:0016021	Homo sapiens family with sequence similarity 189, member A1 (FAM189A1), mRNA [NM_015307]	chr15:29412755-29412696	hs|15q13.1	Agilent_HUMAN_G3V2	NM_015307	chr15	29412696	29412755	-
LNCA_23_P78201	0.00257356	2.58946	mRNA	NM_002280	NM_002280	NM_002280	3886	Hs.73082	KRT35	keratin 35	ENST00000393989	THC2485223	GO:0005882|GO:0005198|GO:0009653	Homo sapiens keratin 35 (KRT35), mRNA [NM_002280]	chr17:39633059-39633000	hs|17q21.2	Agilent_HUMAN_G3V2	NM_002280	chr17	39633000	39633059	-
LNCA_24_P237175	0.0302706	2.5883	mRNA	NM_001322	NM_001322	NM_001322	1470	Hs.669305	CST2	cystatin SA	ENST00000304725	THC2477714	GO:0004869|GO:0005576|GO:0030414	Homo sapiens cystatin SA (CST2), mRNA [NM_001322]	chr20:23807162-23807103	hs|20p11.21	Agilent_HUMAN_G3V2	NM_001322	chr20	23807103	23807162	-
LNCA_33_P3245699	0.00279428	2.58693	mRNA	ENST00000318959	XR_112969	XR_112969	NA	Hs.683855	NA	NA	ENST00000318959	THC2485606	NA	Uncharacterized protein [Source:UniProtKB/TrEMBL;Acc:E9PF64] [ENST00000318959]	chr7:1878356-1878415	hs|7p22.3	Agilent_HUMAN_G3V2	ENST00000318959	chr7	1878356	1878415	+
LNCA_33_P3653888	0.0176649	2.58013	mRNA	AF274944	NA	AF274944	100128185	Hs.542229	LOC100128185	PNAS-19	NA	NP373492	NA	Homo sapiens PNAS-19 mRNA, complete cds. [AF274944]	chr2:688234-688293	hs|2p25.3	Agilent_HUMAN_G3V2	AF274944	chr2	688234	688293	+
LNCA_23_P126528	0.0155903	2.57861	mRNA	NM_005549	NM_005549	NM_005549	3744	Hs.248140	KCNA10	potassium voltage-gated channel, shaker-related subfamily, member 10	ENST00000369771	NA	GO:0005244|GO:0005886|GO:0008076|GO:0005249|GO:0005221|GO:0007268|GO:0016021|GO:0055085|GO:0006813|GO:0006811	Homo sapiens potassium voltage-gated channel, shaker-related subfamily, member 10 (KCNA10), mRNA [NM_005549]	chr1:111060518-111060459	hs|1p13.3	Agilent_HUMAN_G3V2	NM_005549	chr1	111060459	111060518	-
LNCA_21_P0002568	0.000274057	2.57412	mRNA	NR_026832	NR_026832	NR_026832	NA	NA	LOC150622	uncharacterized LOC150622	NA	THC2685329	NA	Homo sapiens uncharacterized LOC150622 (LOC150622), non-coding RNA [NR_026832]	chr2:6109270-6109329	hs|2p25.2	Agilent_HUMAN_G3V2	NR_026832	chr2	6109270	6109329	+
LNCA_33_P3352572	0.0129339	2.57269	mRNA	NA	NA	NA	NA	NA	NA	NA	NA	NA	NA	NA	chrX:000321564-000321505	hs|Xp22.33	Agilent_HUMAN_G3V2	NA	chrX	321505	321564	-
LNCA_33_P3271594	0.0137199	2.57249	mRNA	NM_032546	NM_032546	NM_032546	57159	Hs.516036	TRIM54	tripartite motif containing 54	ENST00000380075	THC2602749	GO:0030018|GO:0005874|GO:0007275|GO:0030154|GO:0046872|GO:0005622|GO:0007165|GO:0005737|GO:0007026|GO:0008270|GO:0004871|GO:0005856|GO:0007017	Homo sapiens tripartite motif containing 54 (TRIM54), transcript variant 1, mRNA [NM_032546]	chr2:27530243-27530302	hs|2p23.3	Agilent_HUMAN_G3V2	NM_032546	chr2	27530243	27530302	+
LNCERCC-00085_231	0.00563168	2.57011	mRNA	DQ883669	NA	NA	NA	NA	NA	NA	NA	NA	NA	NA	NA	NA	Agilent_HUMAN_G3V2	DQ883669	NA	NA	NA	+
LNCA_23_P167030	0.00687949	2.56734	mRNA	NM_000316	NM_000316	NM_000316	5745	Hs.1019	PTH1R	parathyroid hormone 1 receptor	ENST00000427125	THC2547820	GO:0008284|GO:0008285|GO:0005886|GO:0045453|GO:0007200|GO:0005634|GO:0030282|GO:0031526|GO:0043621|GO:0007204|GO:0005622|GO:0016323|GO:0005737|GO:0004991|GO:0002062|GO:0048469|GO:0004872|GO:0004871|GO:0007568|GO:0006874|GO:0001501|GO:0007186|GO:0002076|GO:0005887|GO:0007187|GO:0007188|GO:0007189|GO:0017046	Homo sapiens parathyroid hormone 1 receptor (PTH1R), transcript variant 1, mRNA [NM_000316]	chr3:46944115-46944255	hs|3p21.31	Agilent_HUMAN_G3V2	NM_000316	chr3	46944115	46944255	+
LNCA_33_P3361891	0.0146899	2.56706	mRNA	NM_001042575	NM_001042575	NM_001042575	344805	Hs.435490	TMPRSS7	transmembrane protease, serine 7	ENST00000419127	THC2487758	GO:0005886|GO:0004252|GO:0006508|GO:0008236|GO:0008233|GO:0016021	Homo sapiens transmembrane protease, serine 7 (TMPRSS7), transcript variant 1, mRNA [NM_001042575]	chr3:111799885-111799944	hs|3q13.2	Agilent_HUMAN_G3V2	NM_001042575	chr3	111799885	111799944	+
LNCA_23_P349463	0.0369838	2.56693	mRNA	NM_022097	NM_022097	NM_022097	63928	Hs.178589	CHP2	calcineurin B homologous protein 2	ENST00000300113	THC2473142	GO:0005737|GO:0005509	Homo sapiens calcineurin B homologous protein 2 (CHP2), mRNA [NM_022097]	chr16:23770144-23770203	hs|16p12.2	Agilent_HUMAN_G3V2	NM_022097	chr16	23770144	23770203	+
LNCA_21_P0006864	0.0138721	2.56648	mRNA	AA398971	NA	AA398971	NA	Hs.443381	XLOC_008473	NA	NA	THC2664918	NA	zt93a01.r1 Soares_testis_NHT Homo sapiens cDNA clone IMAGE:729864 5', mRNA sequence [AA398971]	chr10:44476187-44476246	hs|10q11.21	Agilent_HUMAN_G3V2	AA398971	chr10	44476187	44476246	+
LNCA_19_P00322663	0.000165737	2.56351	mRNA	ENST00000514452	NA	NA	NA	NA	Q21WG5	NA	ENST00000514452	THC2712539	NA	Q21WG5_9BURK (Q21WG5) Transcriptional regulator, MarR family, partial (10%) [THC2712539]	chr4:11775382-11775441	hs|4p15.33	Agilent_HUMAN_G3V2	ENST00000514452	chr4	11775382	11775441	+
LNCA_33_P3400258	0.0161176	2.5631	mRNA	NM_207321	NM_207321	NM_207321	142827	Hs.134229	C10orf129	chromosome 10 open reading frame 129	ENST00000404473	THC2603165	GO:0006629|GO:0005739|GO:0000166|GO:0016874|GO:0006631|GO:0005525|GO:0005524|GO:0047760|GO:0046872	Homo sapiens chromosome 10 open reading frame 129 (C10orf129), mRNA [NM_207321]	chr10:96979668-96979727	hs|10q23.33	Agilent_HUMAN_G3V2	NM_207321	chr10	96979668	96979727	+
LNCA_33_P3342156	0.028995	2.56303	mRNA	ENST00000390463	NA	AB305786	NA	Hs.121492	NA	NA	ENST00000390463	NP093581	NA	T cell receptor alpha variable 36/delta variable 7 [Source:HGNC Symbol;Acc:12135] [ENST00000390463]	chr14:22695063-22695122	hs|14q11.2	Agilent_HUMAN_G3V2	ENST00000390463	chr14	22695063	22695122	+
LNCA_33_P3257182	0.0381015	2.55848	mRNA	NM_004533	NM_004533	NM_004533	4606	Hs.85937	MYBPC2	myosin binding protein C, fast type	ENST00000357701	THC2473090	GO:0032982|GO:0030049|GO:0003779|GO:0008307|GO:0007155|GO:0005829	Homo sapiens myosin binding protein C, fast type (MYBPC2), mRNA [NM_004533]	chr19:50967635-50967694	hs|19q13.33	Agilent_HUMAN_G3V2	NM_004533	chr19	50967635	50967694	+
LNCA_33_P3366195	0.0174158	2.55661	mRNA	NM_014862	NM_014862	NM_014862	9915	Hs.459070	ARNT2	aryl-hydrocarbon receptor nuclear translocator 2	ENST00000360062	THC2463425	GO:0001666|GO:0005667|GO:0006355|GO:0008284|GO:0043066|GO:0003700|GO:0046982|GO:0005634|GO:0007417|GO:0001701|GO:0003677|GO:0045944|GO:0004871|GO:0017162|GO:0045893|GO:0032355	Homo sapiens aryl-hydrocarbon receptor nuclear translocator 2 (ARNT2), mRNA [NM_014862]	chr15:80873589-80873648	hs|15q25.1	Agilent_HUMAN_G3V2	NM_014862	chr15	80873589	80873648	+
LNCA_33_P3376976	0.00565088	2.55451	mRNA	NR_024504	NR_024504	NR_024504	646813	Hs.684179	LOC646813	DEAH (Asp-Glu-Ala-His) box polypeptide 9 pseudogene	NA	NA	NA	Homo sapiens DEAH (Asp-Glu-Ala-His) box polypeptide 9 pseudogene (LOC646813), non-coding RNA [NR_024504]	chr11:50379683-50379742	hs|11p11.12	Agilent_HUMAN_G3V2	NR_024504	chr11	50379683	50379742	+
LNCA_19_P00322624	0.0392206	2.55267	mRNA	THC2632020	NA	NA	NA	NA	NA	NA	NA	THC2632020	NA	NA	chr4:129391374-129391433	hs|4q28.2	Agilent_HUMAN_G3V2	THC2632020	chr4	129391374	129391433	+
LNCA_24_P788878	0.025105	2.55109	mRNA	NM_001007595	NM_001007595	NM_001007595	388125	Hs.144372	C2CD4B	C2 calcium-dependent domain containing 4B	ENST00000380392	THC2647275	GO:0005634	Homo sapiens C2 calcium-dependent domain containing 4B (C2CD4B), mRNA [NM_001007595]	chr15:62455837-62455778	hs|15q22.2	Agilent_HUMAN_G3V2	NM_001007595	chr15	62455778	62455837	-
LNCA_33_P3267532	0.0432322	2.54589	mRNA	NM_170736	NM_170736	NM_170736	3772	Hs.411299	KCNJ15	potassium inwardly-rectifying channel, subfamily J, member 15	ENST00000398925	THC2749110	GO:0005242|GO:0005244|GO:0005886|GO:0005887|GO:0007268|GO:0005267|GO:0006813|GO:0006811	Homo sapiens potassium inwardly-rectifying channel, subfamily J, member 15 (KCNJ15), transcript variant 1, mRNA [NM_170736]	chr21:39671301-39671360	hs|21q22.13	Agilent_HUMAN_G3V2	NM_170736	chr21	39671301	39671360	+
LNCA_24_P50248	0.0224532	2.54357	mRNA	NM_001077710	NM_001077710	NM_001077710	642273	Hs.8379	FAM110C	family with sequence similarity 110, member C	ENST00000327669	THC2629769	GO:0005737|GO:0000922|GO:0005815|GO:0005874|GO:0005856	Homo sapiens family with sequence similarity 110, member C (FAM110C), mRNA [NM_001077710]	chr2:45533-45474	hs|2p25.3	Agilent_HUMAN_G3V2	NM_001077710	chr2	45474	45533	-
LNCA_32_P806841	0.0209461	2.54239	mRNA	NM_005738	NM_005738	NM_005738	10124	Hs.245540	ARL4A	ADP-ribosylation factor-like 4A	ENST00000404894	THC2606466	GO:0005622|GO:0005515|GO:0005737|GO:0005886|GO:0000166|GO:0050873|GO:0007264|GO:0005730|GO:0005634|GO:0005525	Homo sapiens ADP-ribosylation factor-like 4A (ARL4A), transcript variant 1, mRNA [NM_005738]	chr7:12728454-12728514	hs|7p21.3	Agilent_HUMAN_G3V2	NM_005738	chr7	12728454	12728514	+
LNCA_21_P0008807	0.0454813	2.5341	mRNA	THC2577654	NA	NA	NA	NA	XLOC_011157	NA	NA	THC2577654	NA	HUMTNL12 ORF2 {Homo sapiens} (exp=-1; wgp=0; cg=0), partial (10%) [THC2577654]	chrUn_gl000217:000032644-000032585	NA	Agilent_HUMAN_G3V2	THC2577654	chrUn_gl000217	32585	32644	-
LNCA_33_P3679901	0.0110203	2.53398	mRNA	ENST00000482201	NA	X64982	NA	Hs.544835	NA	NA	ENST00000482201	THC2701095	NA	olfactory receptor, family 9, subfamily A, member 1 pseudogene [Source:HGNC Symbol;Acc:8486] [ENST00000482201]	chr7:141587554-141587613	hs|7q34	Agilent_HUMAN_G3V2	ENST00000482201	chr7	141587554	141587613	+
LNCERCC-00042_60	0.00270453	2.5286	mRNA	DQ516783	NA	NA	NA	NA	NA	NA	NA	NA	NA	NA	NA	NA	Agilent_HUMAN_G3V2	DQ516783	NA	NA	NA	+
LNCA_21_P0004466	0.00110197	2.52271	mRNA	BX093218	NA	BX093218	NA	Hs.126246	XLOC_005077	NA	NA	THC2656221	NA	BX093218 NCI_CGAP_Kid5 Homo sapiens cDNA clone IMAGp998J143724 ; IMAGE:1472365, mRNA sequence [BX093218]	chr5:169615518-169615459	hs|5q35.1	Agilent_HUMAN_G3V2	BX093218	chr5	169615459	169615518	-
LNCA_23_P55649	0.025385	2.51916	mRNA	NM_001462	NM_001462	NM_001462	2358	Hs.99855	FPR2	formyl peptide receptor 2	ENST00000340023	THC2478865	GO:0004982|GO:0006954|GO:0007186|GO:0006935|GO:0005886|GO:0004930|GO:0006928|GO:0004872|GO:0016021|GO:0004871|GO:0007155	Homo sapiens formyl peptide receptor 2 (FPR2), transcript variant 1, mRNA [NM_001462]	chr19:52273150-52273209	hs|19q13.41	Agilent_HUMAN_G3V2	NM_001462	chr19	52273150	52273209	+
LNCA_21_P0011070	0.00473918	2.50721	mRNA	BI114595	NA	BI114595	NA	Hs.536336	XLOC_l2_003188	NA	NA	THC2781769	NA	602861964F1 NIH_MGC_17 Homo sapiens cDNA clone IMAGE:5021414 5', mRNA sequence [BI114595]	chr12:122502498-122502557	hs|12q24.31	Agilent_HUMAN_G3V2	BI114595	chr12	122502498	122502557	+
LNCA_33_P3300022	0.0218924	2.50288	mRNA	NA	NA	NA	NA	NA	NA	NA	NA	NA	NA	NA	chr2:128394206-128394147	hs|2q14.3	Agilent_HUMAN_G3V2	NA	chr2	128394147	128394206	-
LNCA_33_P3274184	0.00328515	2.49867	mRNA	NA	NA	NA	NA	NA	NA	NA	NA	NA	NA	NA	chr1:234746102-234746161	hs|1q42.3	Agilent_HUMAN_G3V2	NA	chr1	234746102	234746161	+
LNCA_33_P3797403	0.0119634	2.49779	mRNA	BC032840	NA	BC032840	283387	Hs.727244	LOC283387	uncharacterized LOC283387	NA	NA	NA	Homo sapiens hypothetical protein LOC283387, mRNA (cDNA clone IMAGE:4821676). [BC032840]	chr12:58263678-58263619	hs|12q14.1	Agilent_HUMAN_G3V2	BC032840	chr12	58263619	58263678	-
LNCA_23_P27917	0.0219281	2.4948	mRNA	NM_013940	NM_013940	NM_013940	26539	Hs.533925	OR10H1	olfactory receptor, family 10, subfamily H, member 1	ENST00000334920	THC2609795	GO:0004984|GO:0005886|GO:0004930|GO:0004872|GO:0016021|GO:0004871|GO:0050896	Homo sapiens olfactory receptor, family 10, subfamily H, member 1 (OR10H1), mRNA [NM_013940]	chr19:15918319-15918260	hs|19p13.12	Agilent_HUMAN_G3V2	NM_013940	chr19	15918260	15918319	-
LNCA_33_P3379776	0.0300195	2.48658	mRNA	NA	NA	NA	NA	NA	NA	NA	NA	NA	NA	NA	chrX:043417268-043417327	hs|Xp11.3	Agilent_HUMAN_G3V2	NA	chrX	43417268	43417327	+
LNCA_33_P3269423	0.0144335	2.48369	mRNA	NM_207440	NM_207440	NM_207440	400165	Hs.591213	C13orf35	chromosome 13 open reading frame 35	ENST00000356049	THC2489682	NA	Homo sapiens chromosome 13 open reading frame 35 (C13orf35), mRNA [NM_207440]	chr13:113338591-113338650	hs|13q34	Agilent_HUMAN_G3V2	NM_207440	chr13	113338591	113338650	+
LNCA_23_P16915	0.0424284	2.48348	mRNA	NM_012413	NM_012413	NM_012413	25797	Hs.79033	QPCT	glutaminyl-peptide cyclotransferase	ENST00000469098	THC2775284	GO:0016603|GO:0016746|GO:0006508|GO:0008270|GO:0008233|GO:0005576|GO:0017186|GO:0046872|GO:0006464	Homo sapiens glutaminyl-peptide cyclotransferase (QPCT), mRNA [NM_012413]	chr2:37599594-37599862	hs|2p22.2	Agilent_HUMAN_G3V2	NM_012413	chr2	37599594	37599862	+
LNCA_24_P160696	0.0267912	2.4831	mRNA	NM_033364	NM_033364	NM_033364	89876	Hs.341906	C3orf15	chromosome 3 open reading frame 15	ENST00000496010	THC2482240	GO:0005739|GO:0005515|GO:0005737	Homo sapiens chromosome 3 open reading frame 15 (C3orf15), mRNA [NM_033364]	chr3:119483911-119483970	hs|3q13.33	Agilent_HUMAN_G3V2	NM_033364	chr3	119483911	119483970	+
LNCA_33_P3300172	0.000959787	2.48147	mRNA	AK124606	NA	AK124606	10417	Hs.635350	SPON2	spondin 2, extracellular matrix protein	NA	NA	GO:0007411|GO:0045087|GO:0005578|GO:0005102|GO:0005576|GO:0007155|GO:0046872	Homo sapiens cDNA FLJ42615 fis, clone BRACE3014231. [AK124606]	chr4:1159653-1159712	hs|4p16.3	Agilent_HUMAN_G3V2	AK124606	chr4	1159653	1159712	+
LNCA_23_P39931	0.00948167	2.48126	mRNA	NM_003494	NM_003494	NM_003494	8291	Hs.252180	DYSF	dysferlin, limb girdle muscular dystrophy 2B (autosomal recessive)	ENST00000413539	THC2461374	GO:0042383|GO:0005544|GO:0005886|GO:0031410|GO:0016021|GO:0030659	Homo sapiens dysferlin, limb girdle muscular dystrophy 2B (autosomal recessive) (DYSF), transcript variant 8, mRNA [NM_003494]	chr2:71906256-71906315	hs|2p13.2	Agilent_HUMAN_G3V2	NM_003494	chr2	71906256	71906315	+
LNCA_32_P47754	0.0251064	2.47807	mRNA	ENST00000431042	NA	BC060766	144195	Hs.655169	SLC2A14	solute carrier family 2 (facilitated glucose transporter), member 14	ENST00000431042	THC2464691	GO:0016020|GO:0022891|GO:0008643|GO:0007275|GO:0016021|GO:0007283|GO:0030154|GO:0005355	solute carrier family 2 (facilitated glucose transporter), member 14 [Source:HGNC Symbol;Acc:18301] [ENST00000431042]	chr12:7965262-7965203	hs|12p13.31	Agilent_HUMAN_G3V2	ENST00000431042	chr12	7965203	7965262	-
LNCA_21_P0006731	0.030946	2.46866	mRNA	ENST00000425246	NA	BM760324	NA	Hs.568826	XLOC_008712	NA	ENST00000425246	NA	NA	K-EST0040859 S12SNU216 Homo sapiens cDNA clone S12SNU216-8-A12 5', mRNA sequence [BM760324]	chr10:5650603-5650544	hs|10p15.1	Agilent_HUMAN_G3V2	ENST00000425246	chr10	5650544	5650603	-
LNCA_32_P426044	0.0116926	2.46827	mRNA	NM_203408	NM_203408	NM_203408	158724	Hs.143268	FAM47A	family with sequence similarity 47, member A	ENST00000346193	THC2480835	NA	Homo sapiens family with sequence similarity 47, member A (FAM47A), mRNA [NM_203408]	chrX:34149155-34149096	hs|Xp21.1	Agilent_HUMAN_G3V2	NM_203408	chrX	34149096	34149155	-
LNCA_21_P0002096	0.048296	2.4643	mRNA	ENST00000444963	NA	NA	NA	NA	XLOC_002298	NA	ENST00000444963	THC2699448	NA	ALU6_HUMAN (P39193) Alu subfamily SP sequence contamination warning entry, partial (11%) [THC2699448]	chr2:121468020-121467961	hs|2q14.2	Agilent_HUMAN_G3V2	ENST00000444963	chr2	121467961	121468020	-
LNCA_23_P126735	0.0197399	2.44001	mRNA	NM_000572	NM_000572	NM_000572	3586	Hs.193717	IL10	interleukin 10	ENST00000423557	THC2480264	GO:0010468|GO:0051045|GO:0032715|GO:0007267|GO:0002237|GO:0050715|GO:0005615|GO:0042130|GO:0002740|GO:0051091|GO:0042092|GO:0006954|GO:0045019|GO:0042100|GO:0071392|GO:0045347|GO:0002904|GO:0030183|GO:0032496|GO:0034465|GO:0030097|GO:0014823|GO:0032868|GO:0045191|GO:0030595|GO:0042493|GO:0007253|GO:0042536|GO:0006950|GO:0030889|GO:0051384|GO:0006916|GO:0005576|GO:0005141|GO:0005125|GO:0050728|GO:…	Homo sapiens interleukin 10 (IL10), mRNA [NM_000572]	chr1:206941453-206941394	hs|1q32.1	Agilent_HUMAN_G3V2	NM_000572	chr1	206941394	206941453	-
LNCA_23_P68511	0.0028968	2.43272	mRNA	NM_015985	NM_015985	NM_015985	51378	Hs.278973	ANGPT4	angiopoietin 4	ENST00000546022	THC2482235	GO:0030971|GO:0043066|GO:0071456|GO:0050731|GO:0005576|GO:0006916|GO:0050900|GO:0005615|GO:0045766|GO:0010595|GO:0007165|GO:0043536|GO:0030297|GO:0007596|GO:0001935|GO:0016525|GO:0043537	Homo sapiens angiopoietin 4 (ANGPT4), mRNA [NM_015985]	chr20:853722-853663	hs|20p13	Agilent_HUMAN_G3V2	NM_015985	chr20	853663	853722	-
LNCA_32_P49508	0.00522944	2.43252	mRNA	NM_019036	NM_019036	NM_019036	54511	Hs.147054	HMGCLL1	3-hydroxymethyl-3-methylglutaryl-CoA lyase-like 1	ENST00000370852	THC2640265	GO:0046872|GO:0016829|GO:0004419	Homo sapiens 3-hydroxymethyl-3-methylglutaryl-CoA lyase-like 1 (HMGCLL1), transcript variant 1, mRNA [NM_019036]	chr6:55299829-55299770	hs|6p12.1	Agilent_HUMAN_G3V2	NM_019036	chr6	55299770	55299829	-
LNCA_23_P23996	0.0138968	2.42754	mRNA	NM_000429	NM_000429	NM_000429	4143	Hs.282670	MAT1A	methionine adenosyltransferase I, alpha	ENST00000372213	THC2604190	GO:0006520|GO:0006805|GO:0000166|GO:0006556|GO:0032259|GO:0005524|GO:0004478|GO:0046872|GO:0016740|GO:0005829	Homo sapiens methionine adenosyltransferase I, alpha (MAT1A), mRNA [NM_000429]	chr10:82031792-82031733	hs|10q23.1	Agilent_HUMAN_G3V2	NM_000429	chr10	82031733	82031792	-
LNCA_32_P213965	0.00355186	2.42243	mRNA	NR_038309	NR_038309	NR_038309	100507205	Hs.99310	LOC100507205	uncharacterized LOC100507205	ENST00000527757	THC2706490	NA	Homo sapiens uncharacterized LOC100507205 (LOC100507205), non-coding RNA [NR_038309]	chr11:42262643-42261363	hs|11p12	Agilent_HUMAN_G3V2	NR_038309	chr11	42261363	42262643	-
LNCA_33_P3338634	0.0073202	2.42231	mRNA	NM_001146261	NM_001146261	NM_001146261	255928	Hs.658866	SYT14	synaptotagmin XIV	ENST00000367019	NP920567	GO:0016020|GO:0016021	Homo sapiens synaptotagmin XIV (SYT14), transcript variant 1, mRNA [NM_001146261]	chr1:210334193-210334252	hs|1q32.2	Agilent_HUMAN_G3V2	NM_001146261	chr1	210334193	210334252	+
LNCA_23_P71170	0.00148247	2.41677	mRNA	NM_018646	NM_018646	NM_018646	55503	Hs.302740	TRPV6	transient receptor potential cation channel, subfamily V, member 6	ENST00000485138	NP446911	GO:0017158|GO:0005516|GO:0005262|GO:0005886|GO:0005887|GO:0070588|GO:0006816|GO:0055085|GO:0005216|GO:0006811	Homo sapiens transient receptor potential cation channel, subfamily V, member 6 (TRPV6), mRNA [NM_018646]	chr7:142569339-142569280	hs|7q34	Agilent_HUMAN_G3V2	NM_018646	chr7	142569280	142569339	-
LNCA_33_P3358019	0.00116023	2.41616	mRNA	NA	NA	NA	NA	NA	NA	NA	NA	NA	NA	NA	chr9:134431521-134431580	hs|9q34.13	Agilent_HUMAN_G3V2	NA	chr9	134431521	134431580	+
LNCA_33_P3277970	0.0026458	2.41578	mRNA	NA	NA	NA	NA	NA	NA	NA	NA	NA	NA	NA	chrUn_gl000222:000084037-000083978	NA	Agilent_HUMAN_G3V2	NA	chrUn_gl000222	83978	84037	-
LNCA_23_P8716	0.000615578	2.41311	mRNA	NM_012369	NM_012369	NM_012369	26211	Hs.553595	OR2F1	olfactory receptor, family 2, subfamily F, member 1	ENST00000392899	NP1401765	GO:0007165|GO:0004984|GO:0005886|GO:0004930|GO:0004872|GO:0016021|GO:0004871|GO:0050896	Homo sapiens olfactory receptor, family 2, subfamily F, member 1 (OR2F1), mRNA [NM_012369]	chr7:143657529-143657588	hs|7q35	Agilent_HUMAN_G3V2	NM_012369	chr7	143657529	143657588	+
LNCA_21_P0005020	0.002727	2.40863	mRNA	NR_026816	NR_026816	NR_026816	NA	NA	PSORS1C3	psoriasis susceptibility 1 candidate 3 (non-protein coding)	ENST00000376242	THC2485462	NA	Homo sapiens psoriasis susceptibility 1 candidate 3 (non-protein coding) (PSORS1C3), non-coding RNA [NR_026816]	chr6:31145513-31145454	hs|6p21.33	Agilent_HUMAN_G3V2	NR_026816	chr6	31145454	31145513	-
LNCA_24_P862886	0.00679764	2.40774	mRNA	NM_000798	NM_000798	NM_000798	1816	Hs.380681	DRD5	dopamine receptor D5	ENST00000304374	NP511193	GO:0005886|GO:0030819|GO:0007268|GO:0060292|GO:0045776|GO:0031526|GO:0042220|GO:0007191|GO:0001965|GO:0007190|GO:0008144|GO:0048169|GO:0001963|GO:0004872|GO:0033861|GO:0004871|GO:0045924|GO:0001588|GO:0030336|GO:0004930|GO:0007617|GO:0072593|GO:0006874|GO:0004952|GO:0046960|GO:0035240|GO:0045762|GO:0001975|GO:0001994|GO:0005887|GO:0008542|GO:0060158|GO:0042060|GO:0006469|GO:0007189	Homo sapiens dopamine receptor D5 (DRD5), mRNA [NM_000798]	chr4:9784811-9784870	hs|4p16.1	Agilent_HUMAN_G3V2	NM_000798	chr4	9784811	9784870	+
LNCA_23_P436048	0.0270167	2.40692	mRNA	NM_012152	NM_012152	NM_012152	23566	Hs.674915	LPAR3	lysophosphatidic acid receptor 3	ENST00000491034	THC2479802	GO:0005886|GO:0051928|GO:0004930|GO:0032060|GO:0007268|GO:0007204|GO:0043231|GO:0008289|GO:0000187|GO:0001965|GO:0005543|GO:0005887|GO:0007187|GO:0051482|GO:0004872|GO:0004871|GO:0043410	Homo sapiens lysophosphatidic acid receptor 3 (LPAR3), mRNA [NM_012152]	chr1:85331185-85331126	hs|1p22.3	Agilent_HUMAN_G3V2	NM_012152	chr1	85331126	85331185	-
LNCA_21_P0011772	0.00863787	2.40307	mRNA	NM_001135163	NM_001135163	NM_001135163	NA	Hs.568076	SIGLEC11	sialic acid binding Ig-like lectin 11	ENST00000417280	NP862697	GO:0016020|GO:0005529|GO:0016021|GO:0007155	Homo sapiens sialic acid binding Ig-like lectin 11 (SIGLEC11), transcript variant 2, mRNA [NM_001135163]	chr19:50462856-50462797	hs|19q13.33	Agilent_HUMAN_G3V2	NM_001135163	chr19	50462797	50462856	-
LNCA_24_P81900	0.0272986	2.40035	mRNA	NM_006931	NM_006931	NM_006931	6515	Hs.419240	SLC2A3	solute carrier family 2 (facilitated glucose transporter), member 3	ENST00000486749	THC2721000	GO:0015758|GO:0005886|GO:0006766|GO:0005975|GO:0022891|GO:0008643|GO:0006767|GO:0016021|GO:0055085|GO:0005355|GO:0008645	Homo sapiens solute carrier family 2 (facilitated glucose transporter), member 3 (SLC2A3), mRNA [NM_006931]	chr12:8072983-8072924	hs|12p13.31	Agilent_HUMAN_G3V2	NM_006931	chr12	8072924	8072983	-
LNCA_23_P57856	0.0340353	2.39775	mRNA	NM_001130845	NM_001130845	NM_001130845	604	Hs.478588	BCL6	B-cell CLL/lymphoma 6	ENST00000419510	THC2466565	GO:0005515|GO:0030308|GO:0003700|GO:0008285|GO:0030036|GO:0030890|GO:0035024|GO:0005657|GO:0005634|GO:0048294|GO:0007283|GO:0046872|GO:0005622|GO:0043380|GO:0008104|GO:0002829|GO:0048821|GO:0002903|GO:0030183|GO:0032319|GO:0002634|GO:0000060|GO:0032764|GO:0043066|GO:0043065|GO:0050727|GO:0005730|GO:0000122|GO:0045749|GO:0006974|GO:0031490|GO:0043565|GO:0000902|GO:0045629|GO:0003682|GO:0050776|GO:…	Homo sapiens B-cell CLL/lymphoma 6 (BCL6), transcript variant 2, mRNA [NM_001130845]	chr3:187439700-187439641	hs|3q27.3	Agilent_HUMAN_G3V2	NM_001130845	chr3	187439641	187439700	-
LNCA_24_P409230	0.0429985	2.39615	mRNA	NM_001004460	NM_001004460	NM_001004460	341276	Hs.371762	OR10A2	olfactory receptor, family 10, subfamily A, member 2	ENST00000307322	NA	GO:0004984|GO:0005886|GO:0004930|GO:0004872|GO:0016021|GO:0004871|GO:0050896	Homo sapiens olfactory receptor, family 10, subfamily A, member 2 (OR10A2), mRNA [NM_001004460]	chr11:6891028-6891087	hs|11p15.4	Agilent_HUMAN_G3V2	NM_001004460	chr11	6891028	6891087	+
LNCA_23_P7313	0.0385348	2.3935	mRNA	NM_001040058	NM_001040058	NM_001040058	6696	Hs.313	SPP1	secreted phosphoprotein 1	ENST00000360804	THC2522399	GO:0048471|GO:0010033|GO:0007566|GO:0010811|GO:0031988|GO:0050840|GO:0045177|GO:0033280|GO:0005576|GO:0042995|GO:0048545|GO:0005125|GO:0005615|GO:0031214|GO:0001649|GO:0048685|GO:0046697|GO:0005737|GO:0006954|GO:0001503|GO:0045780|GO:0007155	Homo sapiens secreted phosphoprotein 1 (SPP1), transcript variant 1, mRNA [NM_001040058]	chr4:88903920-88903979	hs|4q22.1	Agilent_HUMAN_G3V2	NM_001040058	chr4	88903920	88903979	+
LNCA_33_P3281176	0.000290584	2.38493	mRNA	NA	NA	NA	NA	NA	NA	NA	NA	NA	NA	NA	chrX:001553923-001553982	hs|Xp22.33	Agilent_HUMAN_G3V2	NA	chrX	1553923	1553982	+
LNCA_23_P4489	0.00102906	2.38096	mRNA	NM_138966	NM_138966	NM_138966	81832	Hs.465407	NETO1	neuropilin (NRP) and tolloid (TLL)-like 1	ENST00000299430	THC2486641	GO:0030054|GO:0005886|GO:0045211|GO:0008542|GO:0048169|GO:0014069|GO:0007613|GO:0005576|GO:0004872|GO:0016021|GO:0060076	Homo sapiens neuropilin (NRP) and tolloid (TLL)-like 1 (NETO1), transcript variant 3, mRNA [NM_138966]	chr18:70417312-70416280	hs|18q22.3	Agilent_HUMAN_G3V2	NM_138966	chr18	70416280	70417312	-
LNCA_33_P3417313	0.003592	2.38036	mRNA	NM_023078	NM_023078	NM_023078	65263	Hs.165186	PYCRL	pyrroline-5-carboxylate reductase-like	ENST00000377579	NP1454978	GO:0000166|GO:0016491|GO:0008652|GO:0006561|GO:0042802|GO:0016616|GO:0004735	Homo sapiens pyrroline-5-carboxylate reductase-like (PYCRL), mRNA [NM_023078]	chr8:144688011-144687952	hs|8q24.3	Agilent_HUMAN_G3V2	NM_023078	chr8	144687952	144688011	-
LNCA_21_P0007840	0.0434451	2.37969	mRNA	ENST00000544089	NA	BX090918	NA	Hs.112611	XLOC_009795	NA	ENST00000544089	THC2718963	NA	BX090918 Soares_testis_NHT Homo sapiens cDNA clone IMAGp998C192621 ; IMAGE:1048650, mRNA sequence [BX090918]	chr12:68738677-68743556	hs|12q15	Agilent_HUMAN_G3V2	ENST00000544089	chr12	68738677	68743556	+
LNCA_33_P3302320	0.000538918	2.37883	mRNA	ENST00000444956	NA	BX115224	NA	Hs.372465	NA	NA	ENST00000444956	THC2652114	NA	BX115224 Soares_testis_NHT Homo sapiens cDNA clone IMAGp998G073560, mRNA sequence [BX115224]	chr9:33733032-33732973	hs|9p13.3	Agilent_HUMAN_G3V2	ENST00000444956	chr9	33732973	33733032	-
LNCA_33_P3397433	0.00626045	2.37632	mRNA	NA	NA	NA	NA	NA	NA	NA	NA	NA	NA	NA	chr3:131962370-131962311	hs|3q22.1	Agilent_HUMAN_G3V2	NA	chr3	131962311	131962370	-
LNCA_33_P3253465	0.00793281	2.37412	mRNA	AK124891	NA	AK124891	100131654	Hs.587277	LOC100131654	uncharacterized LOC100131654	NA	THC2486264	NA	Homo sapiens cDNA FLJ42901 fis, clone BRHIP3011241. [AK124891]	chr15:89936478-89936537	hs|15q26.1	Agilent_HUMAN_G3V2	AK124891	chr15	89936478	89936537	+
LNCA_21_P0001475	0.00602336	2.37397	mRNA	ENST00000455966	NA	BC039533	NA	Hs.617422	XLOC_000732	NA	ENST00000455966	THC2654324	NA	AGENCOURT_6564929 NIH_MGC_119 Homo sapiens cDNA clone IMAGE:5743964 5', mRNA sequence [BM563376]	chr1:22350873-22350814	hs|1p36.12	Agilent_HUMAN_G3V2	ENST00000455966	chr1	22350814	22350873	-
LNCA_19_P00321789	0.0404643	2.36496	mRNA	ENST00000440246	NA	DB279316	NA	Hs.128892	XLOC_005464	NA	ENST00000440246	THC2712541	NA	DB279316 UTERU3 Homo sapiens cDNA clone UTERU3005625 5', mRNA sequence [DB279316]	chr6:132420299-132420358	hs|6q23.2	Agilent_HUMAN_G3V2	ENST00000440246	chr6	132420299	132420358	+
LNCA_33_P3274768	0.00850497	2.3643	mRNA	AK128756	NA	AK128756	100132790	NA	LOC100132790	uncharacterized LOC100132790	NA	THC2481891	NA	Homo sapiens cDNA FLJ44869 fis, clone BRAMY2015516. [AK128756]	chr9:70348528-70348587	hs|9q21.11	Agilent_HUMAN_G3V2	AK128756	chr9	70348528	70348587	+
LNCA_23_P111583	0.0496156	2.36052	mRNA	NM_001001547	NM_001001547	NM_001001547	948	Hs.120949	CD36	CD36 molecule (thrombospondin receptor)	ENST00000419819	NP097737	GO:0032755|GO:0035634|GO:0019915|GO:0050830|GO:0050731|GO:0030301|GO:0042992|GO:0060100|GO:0005041|GO:0015911|GO:0042953|GO:0006810|GO:0043123|GO:0044130|GO:0005794|GO:0009986|GO:0032760|GO:0010744|GO:0030169|GO:0030168|GO:0043277|GO:0000122|GO:0055096|GO:0005887|GO:0045121|GO:2000379|GO:0009897|GO:0001954|GO:0070053|GO:0008035|GO:0006629|GO:0007263|GO:0005886|GO:0070892|GO:0071447|GO:0032735|GO:…	Homo sapiens CD36 molecule (thrombospondin receptor) (CD36), transcript variant 2, mRNA [NM_001001547]	chr7:80302711-80303343	hs|7q21.11	Agilent_HUMAN_G3V2	NM_001001547	chr7	80302711	80303343	+
LNCA_23_P354288	0.0160313	2.35713	mRNA	NM_153606	NM_153606	NM_153606	149647	Hs.129293	FAM71A	family with sequence similarity 71, member A	ENST00000545975	THC2473019	NA	Homo sapiens family with sequence similarity 71, member A (FAM71A), mRNA [NM_153606]	chr1:212799772-212799831	hs|1q32.3	Agilent_HUMAN_G3V2	NM_153606	chr1	212799772	212799831	+
LNCA_23_P330561	0.0039236	2.3569	mRNA	NM_174918	NM_174918	NM_174918	199675	Hs.709539	C19orf59	chromosome 19 open reading frame 59	ENST00000333598	THC2475479	GO:0016020|GO:0016021	Homo sapiens chromosome 19 open reading frame 59 (C19orf59), mRNA [NM_174918]	chr19:7744452-7744511	hs|19p13.2	Agilent_HUMAN_G3V2	NM_174918	chr19	7744452	7744511	+
LNCA_33_P3263027	0.00416963	2.3565	mRNA	ENST00000370707	NA	BE266556	NA	Hs.611445	NA	NA	ENST00000370707	NA	NA	Novel proteinUncharacterized protein [Source:UniProtKB/TrEMBL;Acc:Q5JPQ1] [ENST00000370707]	chrX:135057131-135057190	hs|Xq26.3	Agilent_HUMAN_G3V2	ENST00000370707	chrX	135057131	135057190	+
LNCA_21_P0008298	0.0202265	2.35312	mRNA	ENST00000556699	NA	NA	NA	NA	NGDN	neuroguidin, EIF4E binding protein	ENST00000556699	THC2621067	GO:0030424|GO:0005737|GO:0005634|GO:0030175|GO:0030425|GO:0006417	CN120_HUMAN (Q8NEJ9) Protein C14orf120, partial (21%) [THC2621067]	chr14:23978738-23978797	hs|14q11.2	Agilent_HUMAN_G3V2	ENST00000556699	chr14	23978738	23978797	+
LNCA_32_P127350	0.0358153	2.34271	mRNA	NR_024384	NR_024384	NR_024384	645323	Hs.12827	LINC00461	long intergenic non-protein coding RNA 461	NA	THC2628277	NA	Homo sapiens long intergenic non-protein coding RNA 461 (LINC00461), transcript variant 1, non-coding RNA [NR_024384]	chr5:87960601-87960542	hs|5q14.3	Agilent_HUMAN_G3V2	NR_024384	chr5	87960542	87960601	-
LNCA_23_P363365	0.0336522	2.33964	mRNA	NM_016568	NM_016568	NM_016568	51289	Hs.170146	RXFP3	relaxin/insulin-like family peptide receptor 3	ENST00000330120	THC2481975	GO:0004982|GO:0007186|GO:0005886|GO:0005887|GO:0004930|GO:0051482|GO:0004872|GO:0004871	Homo sapiens relaxin/insulin-like family peptide receptor 3 (RXFP3), mRNA [NM_016568]	chr5:33937877-33937936	hs|5p13.2	Agilent_HUMAN_G3V2	NM_016568	chr5	33937877	33937936	+
LNCA_33_P3237859	0.031905	2.33884	mRNA	NR_027013	NR_027013	NR_027013	497634	Hs.406982	LINC00293	long intergenic non-protein coding RNA 293	ENST00000521715	THC2616599	NA	Homo sapiens long intergenic non-protein coding RNA 293 (LINC00293), transcript variant B, non-coding RNA [NR_027013]	chr8:47765869-47765928	hs|8q11.1	Agilent_HUMAN_G3V2	NR_027013	chr8	47765869	47765928	+
LNCA_33_P3321293	0.0480028	2.33614	mRNA	NM_178229	NM_178229	NM_178229	128239	Hs.591495	IQGAP3	IQ motif containing GTPase activating protein 3	ENST00000361170	THC2464087	GO:0051056|GO:0005516|GO:0008361|GO:0071310|GO:0007265|GO:0016328|GO:0005099|GO:0005622|GO:0010628|GO:0000187|GO:0007165|GO:0000082|GO:0005737|GO:0005911|GO:0010629|GO:0001934|GO:0017048|GO:0070371|GO:0033601	Homo sapiens IQ motif containing GTPase activating protein 3 (IQGAP3), mRNA [NM_178229]	chr1:156495257-156495198	hs|1q22	Agilent_HUMAN_G3V2	NM_178229	chr1	156495198	156495257	-
LNCA_23_P112260	0.000714135	2.33576	mRNA	NM_001017998	NM_001017998	NM_001017998	2790	Hs.534196	GNG10	guanine nucleotide binding protein (G protein), gamma 10	ENST00000374293	THC2638035	GO:0006184|GO:0007165|GO:0006112|GO:0007186|GO:0005886|GO:0071377|GO:0005834|GO:0003924|GO:0007268|GO:0004871	Homo sapiens guanine nucleotide binding protein (G protein), gamma 10 (GNG10), transcript variant 1, mRNA [NM_001017998]	chr9:114429198-114431579	hs|9q31.3	Agilent_HUMAN_G3V2	NM_001017998	chr9	114429198	114431579	+
LNCA_33_P3260430	0.0466061	2.33195	mRNA	NM_005988	NM_005988	NM_005988	6700	Hs.355542	SPRR2A	small proline-rich protein 2A	ENST00000392653	THC2536477	GO:0005737|GO:0008544|GO:0030216|GO:0005488|GO:0031424|GO:0001533	Homo sapiens small proline-rich protein 2A (SPRR2A), mRNA [NM_005988]	chr1:153028658-153028599	hs|1q21.3	Agilent_HUMAN_G3V2	NM_005988	chr1	153028599	153028658	-
LNCA_21_P0004062	0.00333497	2.33039	mRNA	ENST00000513561	NA	BE270324	NA	Hs.582536	XLOC_004555	NA	ENST00000513561	NA	NA	601186154F1 NIH_MGC_8 Homo sapiens cDNA clone IMAGE:3543708 5', mRNA sequence [BE270324]	chr5:133249653-133250490	hs|5q31.1	Agilent_HUMAN_G3V2	ENST00000513561	chr5	133249653	133250490	+
LNCA_33_P3404566	0.019369	2.33013	mRNA	NA	NA	NA	NA	NA	NA	NA	NA	NA	NA	NA	chr9:119158957-119158898	hs|9q33.1	Agilent_HUMAN_G3V2	NA	chr9	119158898	119158957	-
LNCA_23_P57110	0.0148669	2.32758	mRNA	NM_033409	NM_033409	NM_033409	113278	Hs.283865	C20orf54	chromosome 20 open reading frame 54	ENST00000381944	THC2472248	GO:0034605|GO:0032217|GO:0005886|GO:0005887|GO:0007605|GO:0006810|GO:0032218	Homo sapiens chromosome 20 open reading frame 54 (C20orf54), mRNA [NM_033409]	chr20:741069-741010	hs|20p13	Agilent_HUMAN_G3V2	NM_033409	chr20	741010	741069	-
LNCA_33_P3398406	0.0178672	2.32531	mRNA	NM_004246	NM_004246	NM_004246	9340	Hs.248202	GLP2R	glucagon-like peptide 2 receptor	ENST00000262441	NP425625	GO:0008284|GO:0005886|GO:0004930|GO:0007188|GO:0004872|GO:0016021|GO:0004871|GO:0004967	Homo sapiens glucagon-like peptide 2 receptor (GLP2R), mRNA [NM_004246]	chr17:9765347-9765406	hs|17p13.1	Agilent_HUMAN_G3V2	NM_004246	chr17	9765347	9765406	+
LNCA_33_P3295415	0.000333022	2.32093	mRNA	NM_024784	NM_024784	NM_024784	79842	Hs.147554	ZBTB3	zinc finger and BTB domain containing 3	ENST00000394807	THC2477256	GO:0005622|GO:0006355|GO:0008270|GO:0005634|GO:0003677|GO:0046872	Homo sapiens zinc finger and BTB domain containing 3 (ZBTB3), mRNA [NM_024784]	chr11:62519488-62519429	hs|11q12.3	Agilent_HUMAN_G3V2	NM_024784	chr11	62519429	62519488	-
LNCA_33_P3272573	0.0239311	2.32009	mRNA	ENST00000379349	NA	NA	10549	NA	PRDX4	peroxiredoxin 4	ENST00000379349	THC2528953	GO:0005739|GO:0005737|GO:0007252|GO:0016491|GO:0005576|GO:0008379|GO:0005615	peroxiredoxin 4 [Source:HGNC Symbol;Acc:17169] [ENST00000379349]	chrX:23682775-23682834	hs|Xp22.11	Agilent_HUMAN_G3V2	ENST00000379349	chrX	23682775	23682834	+
LNCA_33_P3242793	0.0428438	2.31967	mRNA	DQ983818	NA	DQ983818	647215	Hs.576504	C1orf81	chromosome 1 open reading frame 81	NA	NA	NA	Homo sapiens C1orf81 mRNA, partial sequence. [DQ983818]	chr1:200935733-200935792	hs|1q32.1	Agilent_HUMAN_G3V2	DQ983818	chr1	200935733	200935792	+
LNCA_33_P3336449	0.00121423	2.31709	mRNA	ENST00000420852	NA	NA	NA	NA	NA	NA	ENST00000420852	NA	NA	NA	chr2:26894184-26894125	hs|2p23.3	Agilent_HUMAN_G3V2	ENST00000420852	chr2	26894125	26894184	-
LNCA_33_P3451458	0.0254651	2.31323	mRNA	AA861243	NA	AA861243	552852	Hs.521636	NCRNA00249	non-protein coding RNA 249	NA	NA	NA	ak36e05.s1 Soares_testis_NHT Homo sapiens cDNA clone IMAGE:1408064 3', mRNA sequence [AA861243]	chr8:74794625-74794566	hs|8q21.11	Agilent_HUMAN_G3V2	AA861243	chr8	74794566	74794625	-
LNCA_33_P3254306	0.00191324	2.30656	mRNA	ENST00000389168	NA	AK126951	201163	NA	FLCN	folliculin	ENST00000389168	THC2484336	GO:0005515|GO:0005737|GO:0005886|GO:0005634|GO:0001932	folliculin [Source:HGNC Symbol;Acc:27310] [ENST00000389168]	chr17:17128198-17128139	hs|17p11.2	Agilent_HUMAN_G3V2	ENST00000389168	chr17	17128139	17128198	-
LNCA_23_P32165	0.0039731	2.30654	mRNA	NM_004789	NM_004789	NM_004789	9355	Hs.696425	LHX2	LIM homeobox 2	ENST00000373615	THC2471596	GO:0000988|GO:0003700|GO:0001843|GO:0005634|GO:0009953|GO:0021978|GO:2000678|GO:0046872|GO:0043565|GO:0005622|GO:0048646|GO:0007411|GO:0007420|GO:0045944|GO:0030182|GO:0007498|GO:0008270|GO:0045893|GO:0022008	Homo sapiens LIM homeobox 2 (LHX2), mRNA [NM_004789]	chr9:126795257-126795316	hs|9q33.3	Agilent_HUMAN_G3V2	NM_004789	chr9	126795257	126795316	+
LNCA_33_P3324149	0.00609228	2.30254	mRNA	NA	NA	NA	NA	NA	NA	NA	NA	NA	NA	NA	chr2:237477004-237476945	hs|2q37.3	Agilent_HUMAN_G3V2	NA	chr2	237476945	237477004	-
LNCA_33_P3293778	0.013965	2.30233	mRNA	NM_198687	NM_198687	NM_198687	386672	Hs.567901	KRTAP10-4	keratin associated protein 10-4	ENST00000400374	THC2770047	GO:0045095	Homo sapiens keratin associated protein 10-4 (KRTAP10-4), mRNA [NM_198687]	chr21:45994928-45994987	hs|21q22.3	Agilent_HUMAN_G3V2	NM_198687	chr21	45994928	45994987	+
LNCA_33_P3273732	0.0208559	2.30166	mRNA	NA	NA	NA	NA	NA	NA	NA	NA	NA	NA	NA	chr9:137000368-137000309	hs|9q34.2	Agilent_HUMAN_G3V2	NA	chr9	137000309	137000368	-
LNCA_23_P25706	0.016416	2.30135	mRNA	NM_024734	NM_024734	NM_024734	79789	Hs.301478	CLMN	calmin (calponin-like, transmembrane)	ENST00000298912	THC2463596	GO:0005737|GO:0016020|GO:0003779|GO:0016021	Homo sapiens calmin (calponin-like, transmembrane) (CLMN), mRNA [NM_024734]	chr14:95660925-95660250	hs|14q32.13	Agilent_HUMAN_G3V2	NM_024734	chr14	95660250	95660925	-
LNCA_23_P14124	0.00302408	2.29762	mRNA	NM_206827	NM_206827	NM_206827	387496	Hs.192131	RASL11A	RAS-like, family 11, member A	ENST00000241463	THC2478006	GO:0007165|GO:0006355|GO:0016020|GO:0000166|GO:0045943|GO:0007264|GO:0005730|GO:0003924|GO:0005634|GO:0005525	Homo sapiens RAS-like, family 11, member A (RASL11A), mRNA [NM_206827]	chr13:27847667-27847726	hs|13q12.2	Agilent_HUMAN_G3V2	NM_206827	chr13	27847667	27847726	+
LNCA_33_P3416807	0.00460675	2.29631	mRNA	NA	NA	NA	NA	NA	NA	NA	NA	NA	NA	NA	chr8:021625466-021625407	hs|8p21.3	Agilent_HUMAN_G3V2	NA	chr8	21625407	21625466	-
LNCA_33_P3390217	0.0332411	2.29357	mRNA	ENST00000375922	NA	BC104025	164395	Hs.712915	TTLL9	tubulin tyrosine ligase-like family, member 9	ENST00000375922	NP1133814	GO:0005929|GO:0005737|GO:0004835|GO:0016874|GO:0005874|GO:0005932|GO:0005856|GO:0005524|GO:0006464	tubulin tyrosine ligase-like family, member 9 [Source:HGNC Symbol;Acc:16118] [ENST00000375922]	chr20:30531923-30531982	hs|20q11.21	Agilent_HUMAN_G3V2	ENST00000375922	chr20	30531923	30531982	+
LNCA_33_P3342967	0.0158783	2.29247	mRNA	AK128204	NA	AK128204	100129186	Hs.634508	LOC100129186	uncharacterized LOC100129186	NA	THC2481012	NA	Homo sapiens cDNA FLJ46336 fis, clone TESTI4046090. [AK128204]	chr5:42951949-42952008	hs|5p12	Agilent_HUMAN_G3V2	AK128204	chr5	42951949	42952008	+
LNCA_23_P28485	0.0156495	2.2917	mRNA	NM_012198	NM_012198	NM_012198	25801	Hs.377894	GCA	grancalcin, EF-hand calcium binding protein	ENST00000487445	THC2621331	GO:0005737|GO:0006944|GO:0005886|GO:0005509|GO:0042803	Homo sapiens grancalcin, EF-hand calcium binding protein (GCA), mRNA [NM_012198]	chr2:163217169-163217228	hs|2q24.2	Agilent_HUMAN_G3V2	NM_012198	chr2	163217169	163217228	+
LNCA_33_P3411080	0.0126554	2.28765	mRNA	NM_012418	NM_012418	NM_012418	25794	Hs.118555	FSCN2	fascin homolog 2, actin-bundling protein, retinal (Strongylocentrotus purpuratus)	ENST00000417245	THC2657787	GO:0005737|GO:0051015|GO:0030036|GO:0032420|GO:0003779|GO:0042995|GO:0030674|GO:0015629|GO:0051017|GO:0009653|GO:0007601	Homo sapiens fascin homolog 2, actin-bundling protein, retinal (Strongylocentrotus purpuratus) (FSCN2), transcript variant 1, mRNA [NM_012418]	chr17:79503233-79503292	hs|17q25.3	Agilent_HUMAN_G3V2	NM_012418	chr17	79503233	79503292	+
LNCA_33_P3239037	0.0113596	2.28721	mRNA	ENST00000374801	NA	BC038565	NA	Hs.385790	NA	NA	ENST00000374801	THC2630726	NA	chromosome 9 open reading frame 107 [Source:HGNC Symbol;Acc:31372] [ENST00000374801]	chr9:105419645-105419704	hs|9q31.1	Agilent_HUMAN_G3V2	ENST00000374801	chr9	105419645	105419704	+
LNCA_33_P3278362	0.00713722	2.28419	mRNA	NM_020349	NM_020349	NM_020349	26287	Hs.73708	ANKRD2	ankyrin repeat domain 2 (stretch responsive muscle)	ENST00000307518	NP373377	GO:0007517|GO:0006936|GO:0008307|GO:0031674	Homo sapiens ankyrin repeat domain 2 (stretch responsive muscle) (ANKRD2), transcript variant 1, mRNA [NM_020349]	chr10:99343557-99343616	hs|10q24.2	Agilent_HUMAN_G3V2	NM_020349	chr10	99343557	99343616	+
LNCA_33_P3376806	0.00319915	2.28199	mRNA	NM_153714	NM_153714	NM_153714	256815	Hs.522360	C10orf67	chromosome 10 open reading frame 67	ENST00000323327	THC2486453	NA	Homo sapiens chromosome 10 open reading frame 67 (C10orf67), mRNA [NM_153714]	chr10:23605725-23605666	hs|10p12.2	Agilent_HUMAN_G3V2	NM_153714	chr10	23605666	23605725	-
LNCA_33_P3364921	0.0485334	2.27898	mRNA	ENST00000424453	NA	NA	NA	NA	NA	NA	ENST00000424453	THC2770458	NA	NA	chr7:12580702-12580761	hs|7p21.3	Agilent_HUMAN_G3V2	ENST00000424453	chr7	12580702	12580761	+
LNCA_23_P313542	0.000222257	2.27786	mRNA	NM_002929	NM_002929	NM_002929	6011	Hs.103501	GRK1	G protein-coupled receptor kinase 1	ENST00000545304	THC2483641	GO:0042493|GO:0022400|GO:0050254|GO:0005524|GO:0046777|GO:0004672|GO:0004703|GO:0008277|GO:0000166|GO:0016020|GO:0006468|GO:0009416|GO:0004871|GO:0007601|GO:0050896|GO:0009586|GO:0016056	Homo sapiens G protein-coupled receptor kinase 1 (GRK1), mRNA [NM_002929]	chr13:114438077-114438136	hs|13q34	Agilent_HUMAN_G3V2	NM_002929	chr13	114438077	114438136	+
LNCA_33_P3322103	0.0214095	2.27597	mRNA	NA	NA	NA	NA	NA	NA	NA	NA	NA	NA	NA	NA	NA	Agilent_HUMAN_G3V2	NA	NA	NA	NA	+
LNCA_24_P48539	0.0276317	2.27464	mRNA	NM_003830	NM_003830	NM_003830	8778	Hs.310333	SIGLEC5	sialic acid binding Ig-like lectin 5	ENST00000429354	THC2472472	GO:0016020|GO:0005529|GO:0016021|GO:0007155	Homo sapiens sialic acid binding Ig-like lectin 5 (SIGLEC5), mRNA [NM_003830]	chr19:52115603-52115544	hs|19q13.41	Agilent_HUMAN_G3V2	NM_003830	chr19	52115544	52115603	-
LNCA_23_P252193	0.00647785	2.26646	mRNA	NM_002207	NM_002207	NM_002207	3680	Hs.113157	ITGA9	integrin, alpha 9	ENST00000264741	THC2474295	GO:0008305|GO:0005886|GO:0007411|GO:0007229|GO:0043236|GO:0042060|GO:0005518|GO:0005624|GO:0004872|GO:0016021|GO:0007155|GO:0034679	Homo sapiens integrin, alpha 9 (ITGA9), mRNA [NM_002207]	chr3:37860557-37860616	hs|3p22.2	Agilent_HUMAN_G3V2	NM_002207	chr3	37860557	37860616	+
LNCA_33_P3346966	0.0277683	2.26342	mRNA	NM_024532	NM_024532	NM_024532	79582	Hs.602792	SPAG16	sperm associated antigen 16	ENST00000406979	NP1276555	GO:0019861|GO:0042384|GO:0005929|GO:0005737|GO:0030030|GO:0005874|GO:0005634|GO:0007283|GO:0035085|GO:0005856|GO:0035086	Homo sapiens sperm associated antigen 16 (SPAG16), transcript variant 1, mRNA [NM_024532]	chr2:215013930-215013989	hs|2q34	Agilent_HUMAN_G3V2	NM_024532	chr2	215013930	215013989	+
LNCA_33_P3327687	0.00666916	2.26058	mRNA	AK090681	NA	AK090681	727993	Hs.551466	LOC727993	uncharacterized LOC727993	NA	THC2624141	NA	Homo sapiens cDNA FLJ33362 fis, clone BRACE2005337. [AK090681]	chr20:1946336-1946395	hs|20p13	Agilent_HUMAN_G3V2	AK090681	chr20	1946336	1946395	+
LNCA_33_P3262074	0.00665482	2.25948	mRNA	NA	NA	NA	NA	NA	NA	NA	NA	NA	NA	NA	chr11:058991933-058991992	hs|11q12.1	Agilent_HUMAN_G3V2	NA	chr11	58991933	58991992	+
LNCA_21_P0011533	0.0332586	2.25134	mRNA	ENST00000468381	NA	AK090937	NA	Hs.540878	C17orf51	chromosome 17 open reading frame 51	ENST00000468381	THC2595453	NA	K-EST0059882 S4SNU1 Homo sapiens cDNA clone S4SNU1-24-F04 5', mRNA sequence [BM782690]	chr17:21476685-21476626	hs|17p11.2	Agilent_HUMAN_G3V2	ENST00000468381	chr17	21476626	21476685	-
LNCA_23_P256821	0.0291538	2.25035	mRNA	NM_000651	NM_000651	NM_000651	1378	Hs.334019	CR1	complement component (3b/4b) receptor 1 (Knops blood group)	ENST00000400960	THC2471716	GO:0006956|GO:0016020|GO:0005887|GO:0045087|GO:0006958|GO:0004872|GO:0002430|GO:0004875	Homo sapiens complement component (3b/4b) receptor 1 (Knops blood group) (CR1), transcript variant S, mRNA [NM_000651]	chr1:207813016-207813075	hs|1q32.2	Agilent_HUMAN_G3V2	NM_000651	chr1	207813016	207813075	+
LNCA_33_P3298455	0.0291297	2.25025	mRNA	ENST00000504184	XR_109707	XR_109707	NA	Hs.648259	NA	NA	ENST00000504184	THC2482152	NA	CDNA FLJ20464 fis, clone KAT06158HCG1777549Uncharacterized protein [Source:UniProtKB/TrEMBL;Acc:Q9NX35] [ENST00000504184]	chr22:31743381-31743440	hs|22q12.2	Agilent_HUMAN_G3V2	ENST00000504184	chr22	31743381	31743440	+
LNCA_33_P3251617	0.000529179	2.25018	mRNA	NR_034099	NR_034099	NR_034099	388948	Hs.728895	LOC388948	uncharacterized LOC388948	ENST00000409912	THC2607333	NA	Homo sapiens uncharacterized LOC388948 (LOC388948), non-coding RNA [NR_034099]	chr2:47049663-47049722	hs|2p21	Agilent_HUMAN_G3V2	NR_034099	chr2	47049663	47049722	+
LNCA_33_P3224314	0.0108172	2.24718	mRNA	ENST00000377652	NA	BC132839	NA	Hs.7193	NA	NA	ENST00000377652	THC2483218	NA	Uncharacterized proteincDNA FLJ42076 fis, clone SYNOV2018921 [Source:UniProtKB/TrEMBL;Acc:Q6ZVU4] [ENST00000377652]	chr19:46998798-46998857	hs|19q13.32	Agilent_HUMAN_G3V2	ENST00000377652	chr19	46998798	46998857	+
LNCA_24_P186274	0.00597881	2.24271	mRNA	NM_001007563	NM_001007563	NM_001007563	347252	Hs.349705	IGFBPL1	insulin-like growth factor binding protein-like 1	ENST00000377694	THC2479806	GO:0005576|GO:0001558|GO:0005520	Homo sapiens insulin-like growth factor binding protein-like 1 (IGFBPL1), mRNA [NM_001007563]	chr9:38411463-38411404	hs|9p13.1	Agilent_HUMAN_G3V2	NM_001007563	chr9	38411404	38411463	-
LNCA_33_P3369781	0.000273533	2.24177	mRNA	NM_198920	NM_198920	NM_198920	90025	Hs.148609	UBE2CBP	ubiquitin-conjugating enzyme E2C binding protein	ENST00000369747	NP1244587	GO:0005737|GO:0016874	Homo sapiens ubiquitin-conjugating enzyme E2C binding protein (UBE2CBP), mRNA [NM_198920]	chr6:83667091-83667032	hs|6q14.1	Agilent_HUMAN_G3V2	NM_198920	chr6	83667032	83667091	-
LNCA_33_P3354940	0.00269509	2.24171	mRNA	NM_000757	NM_000757	NM_000757	1435	Hs.591402	CSF1	colony stimulating factor 1 (macrophage)	ENST00000344188	THC2480156	GO:0048471|GO:0008284|GO:0005886|GO:0008283|GO:0005157|GO:0046579|GO:0005615|GO:0042803|GO:0030154|GO:0048873|GO:0030278|GO:0045657|GO:0045860|GO:0042476|GO:0030225|GO:0040018|GO:0030097|GO:0030335|GO:0010744|GO:0010743|GO:0030316|GO:0045672|GO:0060763|GO:0005576|GO:0045651|GO:0005125|GO:0043235|GO:0010628|GO:0003006|GO:0032270|GO:0032946|GO:0016020|GO:0042117|GO:0016021|GO:0060611|GO:0042488|GO:…	Homo sapiens colony stimulating factor 1 (macrophage) (CSF1), transcript variant 1, mRNA [NM_000757]	chr1:110472240-110472299	hs|1p13.3	Agilent_HUMAN_G3V2	NM_000757	chr1	110472240	110472299	+
LNCA_21_P0004169	0.0163257	2.24149	mRNA	BX649078	NA	BX649078	NA	Hs.639849	XLOC_004961	NA	NA	NP1159448	NA	GB	chr5:115703404-115703345	hs|5q23.1	Agilent_HUMAN_G3V2	BX649078	chr5	115703345	115703404	-
LNCA_33_P3313519	0.00538394	2.24001	mRNA	NM_139320	NM_139320	NM_139320	89832	Hs.510853	CHRFAM7A	CHRNA7 (cholinergic receptor, nicotinic, alpha 7, exons 5-10) and FAM7A (family with sequence similarity 7A, exons A-E) fusion	ENST00000299847	THC2500519	GO:0005230|GO:0016020|GO:0045211|GO:0016021|GO:0006811	Homo sapiens CHRNA7 (cholinergic receptor, nicotinic, alpha 7, exons 5-10) and FAM7A (family with sequence similarity 7A, exons A-E) fusion (CHRFAM7A), transcript variant 1, mRNA [NM_139320]	chr15:30653544-30653485	hs|15q13.2	Agilent_HUMAN_G3V2	NM_139320	chr15	30653485	30653544	-
LNCA_21_P0003923	0.00369447	2.23702	mRNA	AK098570	NA	AK098570	NA	Hs.171348	XLOC_004325	NA	NA	THC2689317	NA	NA	chr5:29153738-29153797	hs|5p13.3	Agilent_HUMAN_G3V2	AK098570	chr5	29153738	29153797	+
LNCA_21_P0012215	0.0390115	2.23069	mRNA	ENST00000427022	NA	BG462146	NA	Hs.679762	XLOC_l2_009050	NA	ENST00000427022	THC2777544	NA	RST45160 Athersys RAGE Library Homo sapiens cDNA, mRNA sequence [BG462146]	chr21:35697191-35697250	hs|21q22.11	Agilent_HUMAN_G3V2	ENST00000427022	chr21	35697191	35697250	+
LNCA_23_P102611	0.0372341	2.22903	mRNA	NM_003881	NM_003881	NM_003881	8839	Hs.592145	WISP2	WNT1 inducible signaling pathway protein 2	ENST00000372868	THC2486325	GO:0007165|GO:0005737|GO:0008285|GO:0009986|GO:0005886|GO:0007267|GO:0005625|GO:0005576|GO:0007155|GO:0001558|GO:0005520	Homo sapiens WNT1 inducible signaling pathway protein 2 (WISP2), mRNA [NM_003881]	chr20:43356347-43356406	hs|20q13.12	Agilent_HUMAN_G3V2	NM_003881	chr20	43356347	43356406	+
LNCA_23_P159775	0.0331297	2.22273	mRNA	NM_004961	NM_004961	NM_004961	2564	Hs.22785	GABRE	gamma-aminobutyric acid (GABA) A receptor, epsilon	ENST00000486255	THC2494938	GO:0005230|GO:0030054|GO:0005886|GO:0004890|GO:0034707|GO:0045202|GO:0007214|GO:0005254|GO:0005887|GO:0045211|GO:0006810|GO:0005216|GO:0006811	Homo sapiens gamma-aminobutyric acid (GABA) A receptor, epsilon (GABRE), mRNA [NM_004961]	chrX:151121679-151121620	hs|Xq28	Agilent_HUMAN_G3V2	NM_004961	chrX	151121620	151121679	-
LNCA_24_P69538	0.0383288	2.21468	mRNA	NM_138554	NM_138554	NM_138554	7099	Hs.174312	TLR4	toll-like receptor 4	ENST00000472304	THC2479612	GO:0005515|GO:0032755|GO:0016064|GO:0032715|GO:0007249|GO:0032757|GO:0005622|GO:0002756|GO:0002758|GO:0002755|GO:0010572|GO:0032496|GO:0032497|GO:0043123|GO:0006979|GO:0031663|GO:0032689|GO:0042742|GO:0032729|GO:0032868|GO:0032728|GO:0034130|GO:0032760|GO:0034134|GO:0032727|GO:0042535|GO:0009636|GO:0032720|GO:0032722|GO:0002224|GO:0042116|GO:0005887|GO:0043388|GO:0032570|GO:0016046|GO:0009897|GO:…	Homo sapiens toll-like receptor 4 (TLR4), transcript variant 1, mRNA [NM_138554]	chr9:120476856-120476915	hs|9q33.1	Agilent_HUMAN_G3V2	NM_138554	chr9	120476856	120476915	+
LNCA_23_P48056	0.00688378	2.21429	mRNA	NM_006825	NM_006825	NM_006825	10970	Hs.74368	CKAP4	cytoskeleton-associated protein 4	ENST00000378026	THC2638771	GO:0016020|GO:0005783|GO:0033116|GO:0005624|GO:0016021	Homo sapiens cytoskeleton-associated protein 4 (CKAP4), mRNA [NM_006825]	chr12:106632531-106632472	hs|12q23.3	Agilent_HUMAN_G3V2	NM_006825	chr12	106632472	106632531	-
LNCA_23_P259344	0.0370687	2.21194	mRNA	NM_031890	NM_031890	NM_031890	27439	Hs.209577	CECR6	cat eye syndrome chromosome region, candidate 6	ENST00000331437	THC2601255	NA	Homo sapiens cat eye syndrome chromosome region, candidate 6 (CECR6), transcript variant 1, mRNA [NM_031890]	chr22:17597388-17597329	hs|22q11.1	Agilent_HUMAN_G3V2	NM_031890	chr22	17597329	17597388	-
LNCA_33_P3284888	0.000261336	2.21005	mRNA	NM_198989	NM_198989	NM_198989	220107	Hs.710878	DLEU7	deleted in lymphocytic leukemia, 7	ENST00000335465	THC2485203	NA	Homo sapiens deleted in lymphocytic leukemia, 7 (DLEU7), mRNA [NM_198989]	chr13:51417384-51417325	hs|13q14.3	Agilent_HUMAN_G3V2	NM_198989	chr13	51417325	51417384	-
LNCA_32_P358115	0.0264718	2.2088	mRNA	NR_036490	NR_036490	NR_036490	284648	Hs.253475	LOC284648	uncharacterized LOC284648	NA	THC2681882	NA	Homo sapiens uncharacterized LOC284648 (LOC284648), non-coding RNA [NR_036490]	chr1:182584736-182584795	hs|1q25.3	Agilent_HUMAN_G3V2	NR_036490	chr1	182584736	182584795	+
LNCA_33_P3211014	0.00109073	2.2083	mRNA	AY203951	NA	AY203951	NA	Hs.689804	NA	NA	NA	THC2600670	NA	Homo sapiens FP18315 mRNA, complete cds. [AY203951]	chr16:087492260-087492201	hs|16q24.2	Agilent_HUMAN_G3V2	AY203951	chr16	87492201	87492260	-
LNCA_24_P357726	0.00394018	2.20509	mRNA	NM_182707	NM_182707	NM_182707	440533	Hs.466843	PSG8	pregnancy specific beta-1-glycoprotein 8	ENST00000478387	THC2539798	GO:0005576	Homo sapiens pregnancy specific beta-1-glycoprotein 8 (PSG8), transcript variant 1, mRNA [NM_182707]	chr19:43259206-43259147	hs|19q13.2	Agilent_HUMAN_G3V2	NM_182707	chr19	43259147	43259206	-
LNCA_23_P157117	0.025998	2.20319	mRNA	NM_182898	NM_182898	NM_182898	9586	Hs.437075	CREB5	cAMP responsive element binding protein 5	ENST00000409603	NP082957	GO:0043565|GO:0005622|GO:0005515|GO:0003700|GO:0006366|GO:0046983|GO:0008270|GO:0005634|GO:0045893|GO:0046872	Homo sapiens cAMP responsive element binding protein 5 (CREB5), transcript variant 1, mRNA [NM_182898]	chr7:28859103-28859162	hs|7p14.3	Agilent_HUMAN_G3V2	NM_182898	chr7	28859103	28859162	+
LNCA_23_P213228	0.00213482	2.19708	mRNA	NM_003924	NM_003924	NM_003924	8929	Hs.87202	PHOX2B	paired-like homeobox 2b	ENST00000226382	THC2477381	GO:0003712|GO:0021533|GO:0000790|GO:0006355|GO:0000977|GO:0003700|GO:0008285|GO:0005634|GO:0007275|GO:0007399|GO:0043565|GO:0045665|GO:0045666|GO:0045944|GO:0010001|GO:0048468|GO:0001764	Homo sapiens paired-like homeobox 2b (PHOX2B), mRNA [NM_003924]	chr4:41746383-41746324	hs|4p13	Agilent_HUMAN_G3V2	NM_003924	chr4	41746324	41746383	-
LNCA_21_P0013928	0.0186707	2.19641	mRNA	XM_002342340	XM_002342340	XM_002342340	NA	NA	LOC100287789	uncharacterized LOC100287789	NA	NA	NA	PREDICTED: Homo sapiens hypothetical protein LOC100287789 (LOC100287789), mRNA [XM_002342340]	chr3:57742290-57742034	hs|3p14.3	Agilent_HUMAN_G3V2	XM_002342340	chr3	57742034	57742290	-
LNCA_33_P3255176	0.00205322	2.19236	mRNA	NA	NA	NA	NA	NA	NA	NA	NA	NA	NA	NA	chr1:026551643-026551702	hs|1p36.11	Agilent_HUMAN_G3V2	NA	chr1	26551643	26551702	+
LNCA_24_P240259	0.0490302	2.192	mRNA	NM_024727	NM_024727	NM_024727	79782	Hs.411295	LRRC31	leucine rich repeat containing 31	ENST00000264676	THC2482381	NA	Homo sapiens leucine rich repeat containing 31 (LRRC31), mRNA [NM_024727]	chr3:169557906-169557847	hs|3q26.2	Agilent_HUMAN_G3V2	NM_024727	chr3	169557847	169557906	-
LNCA_32_P25514	0.00886305	2.18947	mRNA	NM_198904	NM_198904	NM_198904	2566	Hs.7195	GABRG2	gamma-aminobutyric acid (GABA) A receptor, gamma 2	ENST00000356592	THC2624338	GO:0005515|GO:0006821|GO:0005230|GO:0030054|GO:0005886|GO:0004890|GO:0034707|GO:0045202|GO:0007268|GO:0007214|GO:0055085|GO:0005254|GO:0034220|GO:0005887|GO:0045211|GO:0006810|GO:0008503|GO:0005216	Homo sapiens gamma-aminobutyric acid (GABA) A receptor, gamma 2 (GABRG2), transcript variant 1, mRNA [NM_198904]	chr5:161582441-161582500	hs|5q34	Agilent_HUMAN_G3V2	NM_198904	chr5	161582441	161582500	+
LNCA_21_P0004759	0.0267504	2.18601	mRNA	BC031312	NA	BC031312	NA	Hs.544560	XLOC_005757	NA	ENST00000445346	THC2610691	NA	603195788F1 NIH_MGC_95 Homo sapiens cDNA clone IMAGE:5275628 5', mRNA sequence [BI551045]	chr6:68937101-68937042	hs|6q12	Agilent_HUMAN_G3V2	BC031312	chr6	68937042	68937101	-
LNCA_33_P3336262	0.00256785	2.18405	mRNA	ENST00000412120	XM_003403417	XM_003403417	85452	Hs.259619	KIAA1751	KIAA1751	ENST00000412120	THC2488615	NA	chromosome 1 open reading frame 222 [Source:HGNC Symbol;Acc:27917] [ENST00000412120]	chr1:1853767-1853708	hs|1p36.33	Agilent_HUMAN_G3V2	ENST00000412120	chr1	1853708	1853767	-
LNCA_33_P3398096	0.00322447	2.18209	mRNA	NM_175056	NM_175056	NM_175056	131368	Hs.352213	ZPLD1	zona pellucida-like domain containing 1	ENST00000491959	THC2609900	GO:0016020|GO:0016021	Homo sapiens zona pellucida-like domain containing 1 (ZPLD1), mRNA [NM_175056]	chr3:102196459-102196518	hs|3q12.3	Agilent_HUMAN_G3V2	NM_175056	chr3	102196459	102196518	+
LNCA_24_P335202	0.00847513	2.18144	mRNA	NM_015424	NM_015424	NM_015424	25884	Hs.432379	CHRDL2	chordin-like 2	ENST00000534276	NP1072917	GO:0005739|GO:0005737|GO:0001503|GO:0051216|GO:0007275|GO:0005576|GO:0030154	Homo sapiens chordin-like 2 (CHRDL2), mRNA [NM_015424]	chr11:74413900-74413841	hs|11q13.4	Agilent_HUMAN_G3V2	NM_015424	chr11	74413841	74413900	-
LNCA_23_P93960	0.00636756	2.18071	mRNA	NM_001008270	NM_001008270	NM_001008270	136242	Hs.98947	PRSS37	protease, serine, 37	ENST00000452758	THC2620352	GO:0004252|GO:0006508|GO:0005576|GO:0003824	Homo sapiens protease, serine, 37 (PRSS37), transcript variant 1, mRNA [NM_001008270]	chr7:141536238-141536179	hs|7q34	Agilent_HUMAN_G3V2	NM_001008270	chr7	141536179	141536238	-
LNCA_23_P52207	0.0498933	2.18027	mRNA	NM_012342	NM_012342	NM_012342	25805	Hs.533336	BAMBI	BMP and activin membrane-bound inhibitor homolog (Xenopus laevis)	ENST00000542444	THC2466314	GO:0008284|GO:0005886|GO:0008360|GO:0090263|GO:0010718|GO:0035413|GO:0005114|GO:0032092|GO:0005109|GO:0005737|GO:0016477|GO:0016021|GO:0045893|GO:0030512	Homo sapiens BMP and activin membrane-bound inhibitor homolog (Xenopus laevis) (BAMBI), mRNA [NM_012342]	chr10:28971551-28971610	hs|10p12.1	Agilent_HUMAN_G3V2	NM_012342	chr10	28971551	28971610	+
LNCA_33_P3226755	0.00115766	2.17915	mRNA	AK125630	NA	AK125630	2316	Hs.195464	FLNA	filamin A, alpha	NA	THC2484428	GO:0005802|GO:0005515|GO:0005886|GO:0031267|GO:0005634|GO:0007195|GO:0045022|GO:0015629|GO:0042993|GO:0043433|GO:0042803|GO:0045184|GO:0005829|GO:0005737|GO:0051015|GO:0001948|GO:0005080|GO:0051764|GO:0004871|GO:0043123|GO:0005938|GO:0034989|GO:0034988|GO:0031532|GO:0042177|GO:0034329|GO:0051220|GO:0050821|GO:0030168|GO:0005576|GO:0003779|GO:0048365|GO:0007596|GO:0034394|GO:0002576|GO:0043113|GO:…	Homo sapiens cDNA FLJ43642 fis, clone STOMA2004925. [AK125630]	chrX:153601811-153601752	hs|Xq28	Agilent_HUMAN_G3V2	AK125630	chrX	153601752	153601811	-
LNCA_33_P3382111	0.00238295	2.17375	mRNA	NA	NA	NA	NA	NA	NA	NA	NA	NA	NA	NA	chr1:227163542-227163483	hs|1q42.13	Agilent_HUMAN_G3V2	NA	chr1	227163483	227163542	-
LNCA_21_P0012135	0.0130661	2.17124	mRNA	NR_038239	NR_038239	NR_038239	NA	Hs.599340	LOC100507629	uncharacterized LOC100507629	ENST00000420529	THC2605234	NA	Homo sapiens uncharacterized LOC100507629 (LOC100507629), transcript variant 1, non-coding RNA [NR_038239]	chr20:5414469-5413260	hs|20p12.3	Agilent_HUMAN_G3V2	NR_038239	chr20	5413260	5414469	-
LNCA_33_P3394347	0.017393	2.16626	mRNA	NR_024066	NR_024066	NR_024066	116933	Hs.570680	CLRN1-AS1	CLRN1 antisense RNA 1 (non-protein coding)	ENST00000465576	THC2732226	NA	Homo sapiens CLRN1 antisense RNA 1 (non-protein coding) (CLRN1-AS1), non-coding RNA [NR_024066]	chr3:150797554-150797613	hs|3q25.1	Agilent_HUMAN_G3V2	NR_024066	chr3	150797554	150797613	+
LNCA_24_P52293	0.00610554	2.1662	mRNA	NM_001004488	NM_001004488	NM_001004488	392138	Hs.553787	OR2A25	olfactory receptor, family 2, subfamily A, member 25	ENST00000408898	THC2741807	GO:0004984|GO:0005886|GO:0004930|GO:0004872|GO:0016021|GO:0004871|GO:0050896	Homo sapiens olfactory receptor, family 2, subfamily A, member 25 (OR2A25), mRNA [NM_001004488]	chr7:143771732-143771791	hs|7q35	Agilent_HUMAN_G3V2	NM_001004488	chr7	143771732	143771791	+
LNCA_33_P3365995	0.0139301	2.16424	mRNA	ENST00000405643	NA	AK299538	375449	Hs.595458	MAST4	microtubule associated serine/threonine kinase family member 4	ENST00000405643	THC2682121	GO:0005737|GO:0000287|GO:0000166|GO:0004674|GO:0005524	microtubule associated serine/threonine kinase family member 4 [Source:HGNC Symbol;Acc:19037] [ENST00000405643]	chr5:66255013-66255072	hs|5q12.3	Agilent_HUMAN_G3V2	ENST00000405643	chr5	66255013	66255072	+
LNCA_21_P0002047	0.00778719	2.16121	mRNA	ENST00000423433	NA	NA	NA	NA	XLOC_002077	NA	ENST00000423433	THC2684548	NA	DBP5_CRYNE (Q5KBP5) ATP-dependent RNA helicase DBP5 , partial (4%) [THC2684548]	chr2:45240690-45240631	hs|2p21	Agilent_HUMAN_G3V2	ENST00000423433	chr2	45240631	45240690	-
LNCA_24_P53976	0.0317925	2.15924	mRNA	NM_002065	NM_002065	NM_002065	2752	Hs.518525	GLUL	glutamate-ammonia ligase	ENST00000491322	THC2465165	GO:0005794|GO:0008283|GO:0016874|GO:0008652|GO:0007268|GO:0005524|GO:0016829|GO:0042802|GO:0009749|GO:0005829|GO:0005622|GO:0005739|GO:0034641|GO:0005737|GO:0004351|GO:0000166|GO:0004356|GO:0001504|GO:0006542	Homo sapiens glutamate-ammonia ligase (GLUL), transcript variant 1, mRNA [NM_002065]	chr1:182352796-182352737	hs|1q25.3	Agilent_HUMAN_G3V2	NM_002065	chr1	182352737	182352796	-
LNCA_32_P83049	0.00318071	2.15813	mRNA	NM_014971	NM_014971	NM_014971	22979	Hs.4892	EFR3B	EFR3 homolog B (S. cerevisiae)	NA	THC2606770	GO:0005488	Homo sapiens EFR3 homolog B (S. cerevisiae) (EFR3B), mRNA [NM_014971]	chr2:25381946-25382004	hs|2p23.3	Agilent_HUMAN_G3V2	NM_014971	chr2	25381946	25382004	+
LNCA_21_P0003496	0.0289353	2.15804	mRNA	ENST00000512219	NA	BC038750	NA	Hs.143958	XLOC_004058	NA	ENST00000512219	THC2719919	NA	603203573F1 NIH_MGC_97 Homo sapiens cDNA clone IMAGE:5269171 5', mRNA sequence [BI463491]	chr4:120720352-120720293	hs|4q26	Agilent_HUMAN_G3V2	ENST00000512219	chr4	120720293	120720352	-
LNCA_33_P3340260	0.0368456	2.1563	mRNA	ENST00000399391	XM_001717531	XM_001717531	340990	Hs.688380	OTOG	otogelin	ENST00000399391	NA	GO:0016324|GO:0005886|GO:0046556|GO:0046373|GO:0005576|GO:0005615	otogelin [Source:HGNC Symbol;Acc:8516] [ENST00000399391]	chr11:17662307-17662366	hs|11p15.1	Agilent_HUMAN_G3V2	ENST00000399391	chr11	17662307	17662366	+
LNCA_23_P321703	0.034409	2.15384	mRNA	NM_004049	NM_004049	NM_004049	597	Hs.227817	BCL2A1	BCL2-related protein A1	ENST00000485386	THC2477337	GO:0005515|GO:0005737|GO:0042981|GO:0006916	Homo sapiens BCL2-related protein A1 (BCL2A1), transcript variant 1, mRNA [NM_004049]	chr15:80253252-80253220	hs|15q25.1	Agilent_HUMAN_G3V2	NM_004049	chr15	80253220	80253252	-
LNCA_33_P3340229	0.00276267	2.15037	mRNA	NA	NA	NA	NA	NA	NA	NA	NA	NA	NA	NA	chr19:057910345-057910286	hs|19q13.43	Agilent_HUMAN_G3V2	NA	chr19	57910286	57910345	-
LNCA_32_P222695	0.0315663	2.13415	mRNA	NM_001001669	NM_001001669	NM_001001669	389337	Hs.256206	ARHGEF37	Rho guanine nucleotide exchange factor (GEF) 37	ENST00000333677	THC2568131	GO:0005622|GO:0005085|GO:0005737|GO:0035023|GO:0005089	Homo sapiens Rho guanine nucleotide exchange factor (GEF) 37 (ARHGEF37), mRNA [NM_001001669]	chr5:149014156-149014215	hs|5q32	Agilent_HUMAN_G3V2	NM_001001669	chr5	149014156	149014215	+
LNCA_24_P370172	0.00958985	2.13358	mRNA	NM_181879	NM_181879	NM_181879	353514	Hs.710986	LILRA5	leukocyte immunoglobulin-like receptor, subfamily A (with TM domain), member 5	ENST00000432233	THC2490917	GO:0016020|GO:0045087|GO:0005576|GO:0004872|GO:0016021	Homo sapiens leukocyte immunoglobulin-like receptor, subfamily A (with TM domain), member 5 (LILRA5), transcript variant 3, mRNA [NM_181879]	chr19:54822777-54822718	hs|19q13.42	Agilent_HUMAN_G3V2	NM_181879	chr19	54822718	54822777	-
LNCA_33_P3419026	0.0369853	2.13342	mRNA	NM_001142700	NM_001142700	NM_001142700	1740	Hs.367656	DLG2	discs, large homolog 2 (Drosophila)	ENST00000546021	THC2476616	GO:0005515|GO:0030054|GO:0046982|GO:0005886|GO:0045202|GO:0004385|GO:0005624|GO:0014069|GO:0030165|GO:0030425|GO:0005737|GO:0045211|GO:0010923|GO:0045161|GO:0043025|GO:0043113	Homo sapiens discs, large homolog 2 (Drosophila) (DLG2), transcript variant 3, mRNA [NM_001142700]	chr11:83674065-83674006	hs|11q14.1	Agilent_HUMAN_G3V2	NM_001142700	chr11	83674006	83674065	-
LNCA_33_P3307119	0.0326887	2.12856	mRNA	NM_001004759	NM_001004759	NM_001004759	401665	Hs.553804	OR51T1	olfactory receptor, family 51, subfamily T, member 1	ENST00000322049	THC2602895	GO:0004984|GO:0005886|GO:0004930|GO:0004872|GO:0016021|GO:0004871|GO:0050896	Homo sapiens olfactory receptor, family 51, subfamily T, member 1 (OR51T1), mRNA [NM_001004759]	chr11:4903973-4904032	hs|11p15.4	Agilent_HUMAN_G3V2	NM_001004759	chr11	4903973	4904032	+
LNCA_23_P93772	0.0494716	2.12657	mRNA	NM_019102	NM_019102	NM_019102	3202	Hs.655218	HOXA5	homeobox A5	ENST00000222726	THC2473005	GO:0005515|GO:0007389|GO:0003700|GO:0005634|GO:0048704|GO:0030878|GO:0010870|GO:0009952|GO:0060574|GO:0003016|GO:0060644|GO:0035264|GO:0045639|GO:0045944|GO:0060435|GO:0043065|GO:0048286|GO:0060764|GO:0003677|GO:0033599|GO:0043565|GO:0001501|GO:0060441|GO:0060638|GO:0016477|GO:0045647|GO:0016525|GO:0060484|GO:0060535|GO:0002009|GO:0060749|GO:0060480	Homo sapiens homeobox A5 (HOXA5), mRNA [NM_019102]	chr7:27181606-27181547	hs|7p15.2	Agilent_HUMAN_G3V2	NM_019102	chr7	27181547	27181606	-
LNCA_23_P413224	0.0296981	2.12596	mRNA	NM_004828	NM_004828	NM_004828	9436	Hs.194721	NCR2	natural cytotoxicity triggering receptor 2	ENST00000373089	THC2487994	GO:0007165|GO:0006968|GO:0005886|GO:0005887|GO:0004872|GO:0004888	Homo sapiens natural cytotoxicity triggering receptor 2 (NCR2), transcript variant 1, mRNA [NM_004828]	chr6:41304077-41304136	hs|6p21.1	Agilent_HUMAN_G3V2	NM_004828	chr6	41304077	41304136	+
LNCA_33_P3274691	0.0429069	2.12103	mRNA	NR_002934	NR_002934	NR_002934	619207	Hs.659384	LOC619207	scavenger receptor protein family member	ENST00000356567	NP1076594	GO:0016020|GO:0016021|GO:0005044	Homo sapiens scavenger receptor protein family member (LOC619207), non-coding RNA [NR_002934]	chr10:135278188-135278247	hs|10q26.3	Agilent_HUMAN_G3V2	NR_002934	chr10	135278188	135278247	+
LNCA_33_P3223106	0.00268078	2.12011	mRNA	NR_034163	NR_034163	NR_034163	645700	Hs.690815	ZNF890P	zinc finger protein 890, pseudogene	ENST00000422060	NA	NA	Homo sapiens zinc finger protein 890, pseudogene (ZNF890P), non-coding RNA [NR_034163]	chr7:5176246-5176187	hs|7p22.1	Agilent_HUMAN_G3V2	NR_034163	chr7	5176187	5176246	-
LNCA_33_P3291772	0.0145652	2.11931	mRNA	NA	NA	NA	NA	NA	NA	NA	NA	NA	NA	NA	chr18:061164087-061164146	hs|18q21.33	Agilent_HUMAN_G3V2	NA	chr18	61164087	61164146	+
LNCA_23_P16063	0.0363017	2.11415	mRNA	NM_002088	NM_002088	NM_002088	2901	Hs.367799	GRIK5	glutamate receptor, ionotropic, kainate 5	ENST00000301218	THC2490670	GO:0030424|GO:0017124|GO:0030054|GO:0008328|GO:0005886|GO:0005234|GO:0007268|GO:0045202|GO:0030425|GO:0042802|GO:0043195|GO:0045211|GO:0015277|GO:0043204|GO:0051649|GO:0004872|GO:0019717|GO:0043526|GO:0071333|GO:0006811|GO:0030165|GO:0043113|GO:0016021|GO:0006621|GO:0005216	Homo sapiens glutamate receptor, ionotropic, kainate 5 (GRIK5), mRNA [NM_002088]	chr19:42507588-42507529	hs|19q13.2	Agilent_HUMAN_G3V2	NM_002088	chr19	42507529	42507588	-
LNCA_23_P101642	0.0048834	2.10603	mRNA	NM_002842	NM_002842	NM_002842	5794	Hs.179770	PTPRH	protein tyrosine phosphatase, receptor type, H	ENST00000376350	THC2479932	GO:0005739|GO:0005515|GO:0005737|GO:0006470|GO:0016787|GO:0016020|GO:0005887|GO:0005001|GO:0005730|GO:0006915|GO:0005634	Homo sapiens protein tyrosine phosphatase, receptor type, H (PTPRH), transcript variant 1, mRNA [NM_002842]	chr19:55692827-55692768	hs|19q13.42	Agilent_HUMAN_G3V2	NM_002842	chr19	55692768	55692827	-
LNCA_33_P3277012	0.00886151	2.10465	mRNA	NM_004402	NM_004402	NM_004402	1677	Hs.133089	DFFB	DNA fragmentation factor, 40kDa, beta polypeptide (caspase-activated DNase)	ENST00000338895	NP865504	GO:0006915|GO:0005634|GO:0006917|GO:0003677|GO:0006921|GO:0005829|GO:0035556|GO:0004516|GO:0004536|GO:0005737|GO:0016787|GO:0006309|GO:0030263|GO:0005654|GO:0019899	Homo sapiens DNA fragmentation factor, 40kDa, beta polypeptide (caspase-activated DNase) (DFFB), mRNA [NM_004402]	chr1:3775337-3775396	hs|1p36.32	Agilent_HUMAN_G3V2	NM_004402	chr1	3775337	3775396	+
LNCA_33_P3339575	0.00557435	2.09983	mRNA	AK126828	NA	AK126828	647983	Hs.677472	LOC647983	uncharacterized LOC647983	NA	THC2484422	NA	Homo sapiens cDNA FLJ44880 fis, clone BRAMY2035801. [AK126828]	chr18:14991653-14991594	hs|18p11.21	Agilent_HUMAN_G3V2	AK126828	chr18	14991594	14991653	-
LNCA_23_P101871	0.0480904	2.09346	mRNA	NM_024907	NM_024907	NM_024907	115290	Hs.531770	FBXO17	F-box protein 17	ENST00000292852	THC2698726	GO:0005515|GO:0030163|GO:0001948|GO:0019005	Homo sapiens F-box protein 17 (FBXO17), transcript variant 2, mRNA [NM_024907]	chr19:39432700-39432641	hs|19q13.2	Agilent_HUMAN_G3V2	NM_024907	chr19	39432641	39432700	-
LNCA_33_P3220670	0.00331624	2.09239	mRNA	BX108667	NA	BX108667	644649	Hs.729577	LOC644649	apolipoprotein O pseudogene	NA	THC2763353	NA	BX108667 Soares_NFL_T_GBC_S1 Homo sapiens cDNA clone IMAGp998I233958, mRNA sequence [BX108667]	chr16:59785954-59785895	hs|16q21	Agilent_HUMAN_G3V2	BX108667	chr16	59785895	59785954	-
LNCA_33_P3219384	0.0198301	2.09125	mRNA	NR_024385	NR_024385	NR_024385	151300	Hs.420716	LOC151300	uncharacterized LOC151300	NA	THC2493095	NA	Homo sapiens uncharacterized LOC151300 (LOC151300), transcript variant 1, non-coding RNA [NR_024385]	chr2:219842570-219842629	hs|2q35	Agilent_HUMAN_G3V2	NR_024385	chr2	219842570	219842629	+
LNCA_23_P17880	0.007465	2.09014	mRNA	NM_005740	NM_005740	NM_005740	10126	Hs.632766	DNAL4	dynein, axonemal, light chain 4	ENST00000486019	THC2758451	GO:0005929|GO:0048011|GO:0005737|GO:0042623|GO:0005886|GO:0005874|GO:0005858|GO:0035085|GO:0005856|GO:0003777|GO:0007018	Homo sapiens dynein, axonemal, light chain 4 (DNAL4), mRNA [NM_005740]	chr22:39175618-39175559	hs|22q13.1	Agilent_HUMAN_G3V2	NM_005740	chr22	39175559	39175618	-
LNCA_21_P0000623	0.00608831	2.08991	mRNA	NR_034026	NR_034026	NR_034026	NA	Hs.375063	LINC00421	long intergenic non-protein coding RNA 421	ENST00000413833	NA	NA	Homo sapiens long intergenic non-protein coding RNA 421 (LINC00421), non-coding RNA [NR_034026]	chr13:19920795-19920854	hs|13q12.11	Agilent_HUMAN_G3V2	NR_034026	chr13	19920795	19920854	+
LNCA_24_P236753	0.00931401	2.08775	mRNA	NM_003585	NM_003585	NM_003585	8447	Hs.551705	DOC2B	double C2-like domains, beta	ENST00000496357	THC2481597	GO:0019905|GO:0005215|GO:0005886|GO:0048791|GO:0031201|GO:0031340|GO:0006887|GO:0008021|GO:0005544|GO:0005737|GO:0008104|GO:0045956|GO:0032024	Homo sapiens double C2-like domains, beta (DOC2B), mRNA [NM_003585]	chr17:11929-11331	hs|17p13.3	Agilent_HUMAN_G3V2	NM_003585	chr17	11331	11929	-
LNCA_33_P3411325	0.00108224	2.08091	mRNA	THC2668129	NA	NA	NA	NA	NA	NA	NA	THC2668129	NA	Q8IVL5_HUMAN (Q8IVL5) Leprecan-like 1 protein, partial (3%) [THC2668129]	chr16:032252763-032252704	hs|16p11.2	Agilent_HUMAN_G3V2	THC2668129	chr16	32252704	32252763	-
LNCA_33_P3252954	0.0196633	2.0779	mRNA	ENST00000382730	NA	AK129677	85409	Hs.240951	NKD2	naked cuticle homolog 2 (Drosophila)	ENST00000382730	NP852812	GO:0005515|GO:0005737|GO:0005886|GO:0005509|GO:0006810|GO:0016023|GO:0016055|GO:0006887|GO:0031625	naked cuticle homolog 2 (Drosophila) [Source:HGNC Symbol;Acc:17046] [ENST00000382730]	chr5:1036945-1037004	hs|5p15.33	Agilent_HUMAN_G3V2	ENST00000382730	chr5	1036945	1037004	+
LNCA_33_P3407057	0.0379887	2.07583	mRNA	THC2581513	NA	NA	NA	NA	NA	NA	NA	THC2581513	NA	Q53GK4_HUMAN (Q53GK4) Pyruvate kinase 3 isoform 1 variant (Fragment), partial (47%) [THC2581513]	chr15:072499430-072499371	hs|15q23	Agilent_HUMAN_G3V2	THC2581513	chr15	72499371	72499430	-
LNCA_33_P3334923	0.0168897	2.07456	mRNA	NR_028138	NR_028138	NR_028138	338758	Hs.601766	LOC338758	uncharacterized LOC338758	NA	THC2601756	NA	Homo sapiens uncharacterized LOC338758 (LOC338758), non-coding RNA [NR_028138]	chr12:90105487-90105546	hs|12q21.33	Agilent_HUMAN_G3V2	NR_028138	chr12	90105487	90105546	+
LNCA_33_P3335576	0.0177189	2.0718	mRNA	NA	NA	NA	NA	NA	NA	NA	NA	NA	NA	NA	chr7:076751624-076751683	hs|7q11.23	Agilent_HUMAN_G3V2	NA	chr7	76751624	76751683	+
LNCA_33_P3876591	0.0207168	2.07096	mRNA	CD050382	NA	CD050382	677842	Hs.405444	SNORA76	small nucleolar RNA, H/ACA box 76	NA	NA	NA	AGENCOURT_13972169 NIH_MGC_173 Homo sapiens cDNA 5', mRNA sequence [CD050382]	chr17:62224531-62224590	hs|17q23.3	Agilent_HUMAN_G3V2	CD050382	chr17	62224531	62224590	+
LNCA_33_P3376273	0.0199715	2.06869	mRNA	ENST00000378941	NA	NA	2710	NA	GK	glycerol kinase	ENST00000378941	NA	GO:0004370|GO:0005975|GO:0005741|GO:0005524|GO:0006071|GO:0046167|GO:0005829|GO:0005739|GO:0005737|GO:0000166|GO:0016020|GO:0019432|GO:0006641|GO:0044255|GO:0016740	glycerol kinase [Source:HGNC Symbol;Acc:4289] [ENST00000378941]	chrX:30696155-30696214	hs|Xp21.2	Agilent_HUMAN_G3V2	ENST00000378941	chrX	30696155	30696214	+
LNCA_21_P0004653	0.00795717	2.06797	mRNA	ENST00000415787	NA	BC042616	NA	Hs.710016	XLOC_005306	NA	ENST00000415787	THC2500571	NA	602688801F1 NIH_MGC_95 Homo sapiens cDNA clone IMAGE:4821025 5', mRNA sequence [BG704570]	chr6:46500275-46500334	hs|6p12.3	Agilent_HUMAN_G3V2	ENST00000415787	chr6	46500275	46500334	+
LNCA_23_P145761	0.0130091	2.06739	mRNA	NM_005738	NM_005738	NM_005738	10124	Hs.245540	ARL4A	ADP-ribosylation factor-like 4A	ENST00000404894	THC2774405	GO:0005622|GO:0005515|GO:0005737|GO:0005886|GO:0000166|GO:0050873|GO:0007264|GO:0005730|GO:0005634|GO:0005525	Homo sapiens ADP-ribosylation factor-like 4A (ARL4A), transcript variant 1, mRNA [NM_005738]	chr7:12728281-12728340	hs|7p21.3	Agilent_HUMAN_G3V2	NM_005738	chr7	12728281	12728340	+
LNCA_33_P3326382	0.000406375	2.06698	mRNA	NM_052874	NM_052874	NM_052874	112755	Hs.542230	STX1B	syntaxin 1B	ENST00000215095	THC2473719	GO:0005230|GO:0005234|GO:0019904|GO:0005624|GO:0007268|GO:0006886|GO:0005484|GO:0016020|GO:0005887|GO:0017157|GO:0006810|GO:0006836|GO:0016192	Homo sapiens syntaxin 1B (STX1B), mRNA [NM_052874]	chr16:31001280-31001221	hs|16p11.2	Agilent_HUMAN_G3V2	NM_052874	chr16	31001221	31001280	-
LNCERCC-00079_170	0.0226848	2.06695	mRNA	DQ883652	NA	NA	NA	NA	NA	NA	NA	NA	NA	NA	NA	NA	Agilent_HUMAN_G3V2	DQ883652	NA	NA	NA	+
LNCA_23_P42257	0.00099126	2.06637	mRNA	NM_003897	NM_003897	NM_003897	8870	Hs.76095	IER3	immediate early response 3	ENST00000376382	THC2759397	GO:0005515|GO:0016020|GO:0006915|GO:0006916|GO:0016021|GO:0009653	Homo sapiens immediate early response 3 (IER3), mRNA [NM_003897]	chr6:30711371-30711312	hs|6p21.33	Agilent_HUMAN_G3V2	NM_003897	chr6	30711312	30711371	-
LNCA_33_P3296721	0.0464514	2.06434	mRNA	NA	NA	NA	NA	NA	NA	NA	NA	NA	NA	NA	chr16:090168520-090168579	hs|16q24.3	Agilent_HUMAN_G3V2	NA	chr16	90168520	90168579	+
LNCA_33_P3395859	0.0233514	2.06212	mRNA	NM_001193623	NM_001193623	NM_001193623	147646	Hs.148344	LOC147646	uncharacterized LOC147646	NA	THC2602398	NA	Homo sapiens uncharacterized LOC147646 (LOC147646), mRNA [NM_001193623]	chr19:51891601-51891543	hs|19q13.41	Agilent_HUMAN_G3V2	NM_001193623	chr19	51891543	51891601	-
LNCA_33_P3268695	0.0316863	2.06203	mRNA	NM_032772	NM_032772	NM_032772	84858	Hs.195710	ZNF503	zinc finger protein 503	ENST00000372516	THC2628451	GO:0005622|GO:0006355|GO:0008270|GO:0005634|GO:0003676|GO:0046872	Homo sapiens zinc finger protein 503 (ZNF503), mRNA [NM_032772]	chr10:77158823-77158764	hs|10q22.2	Agilent_HUMAN_G3V2	NM_032772	chr10	77158764	77158823	-
LNCA_33_P3278330	0.00350983	2.06184	mRNA	BC033059	NA	BC033059	440867	Hs.711549	FLJ16124	FLJ16124 protein	NA	THC2488342	NA	Homo sapiens FLJ16124 protein, mRNA (cDNA clone MGC:43245 IMAGE:5264239), complete cds. [BC033059]	chr2:65663956-65664015	hs|2p14	Agilent_HUMAN_G3V2	BC033059	chr2	65663956	65664015	+
LNCA_24_P159648	0.0341588	2.06007	mRNA	NM_006340	NM_006340	NM_006340	10458	Hs.128316	BAIAP2	BAI1-associated protein 2	ENST00000392411	THC2604374	GO:0005515|GO:0008286|GO:0017124|GO:0030054|GO:0005886|GO:0005730|GO:0005634|GO:0030175|GO:0007409|GO:0015629|GO:0008022|GO:0001726|GO:0005829|GO:0007165|GO:0009617|GO:0005737|GO:0032956|GO:0046847|GO:0070064|GO:0008093	Homo sapiens BAI1-associated protein 2 (BAIAP2), transcript variant 3, mRNA [NM_006340]	chr17:79078484-79079905	hs|17q25.3	Agilent_HUMAN_G3V2	NM_006340	chr17	79078484	79079905	+
LNCA_23_P36397	0.0118061	2.05786	mRNA	NM_000785	NM_000785	NM_000785	1594	Hs.524528	CYP27B1	cytochrome P450, family 27, subfamily B, polypeptide 1	ENST00000228606	THC2640937	GO:0043627|GO:0030308|GO:0008285|GO:0006805|GO:0042368|GO:0042369|GO:0005741|GO:0033280|GO:0030282|GO:0046872|GO:0055074|GO:0005739|GO:0004498|GO:0046697|GO:0004497|GO:0010980|GO:0005737|GO:0045618|GO:0032496|GO:0006816|GO:0034341|GO:0008202|GO:0030500|GO:0042359|GO:0009055|GO:0070314|GO:0016020|GO:0006766|GO:0034612|GO:0016705|GO:0010956|GO:0070564|GO:0020037	Homo sapiens cytochrome P450, family 27, subfamily B, polypeptide 1 (CYP27B1), nuclear gene encoding mitochondrial protein, mRNA [NM_000785]	chr12:58156635-58156576	hs|12q14.1	Agilent_HUMAN_G3V2	NM_000785	chr12	58156576	58156635	-
LNCA_33_P3365432	0.0147488	2.05778	mRNA	NM_000631	NM_000631	NM_000631	4689	Hs.474781	NCF4	neutrophil cytosolic factor 4, 40kDa	ENST00000447071	THC2672791	GO:0005515|GO:0006955|GO:0005737|GO:0007154|GO:0016020|GO:0046983|GO:0043020|GO:0035091|GO:0055114|GO:0005829	Homo sapiens neutrophil cytosolic factor 4, 40kDa (NCF4), transcript variant 1, mRNA [NM_000631]	chr22:37271750-37271809	hs|22q12.3	Agilent_HUMAN_G3V2	NM_000631	chr22	37271750	37271809	+
LNCA_23_P35092	0.0392604	2.05624	mRNA	NM_153758	NM_153758	NM_153758	29949	Hs.661017	IL19	interleukin 19	ENST00000270218	THC2478786	GO:0007165|GO:0006955|GO:0072593|GO:0006915|GO:0042226|GO:0005576|GO:0006917|GO:0005615|GO:0005125	Homo sapiens interleukin 19 (IL19), transcript variant 1, mRNA [NM_153758]	chr1:207010307-207010366	hs|1q32.1	Agilent_HUMAN_G3V2	NM_153758	chr1	207010307	207010366	+
LNCA_23_P139648	0.0126862	2.05504	mRNA	NM_000415	NM_000415	NM_000415	3375	Hs.46835	IAPP	islet amyloid polypeptide	ENST00000240652	THC2465903	GO:0007165|GO:0005179|GO:0031018|GO:0007267|GO:0005102|GO:0006915|GO:0005625|GO:0005576	Homo sapiens islet amyloid polypeptide (IAPP), mRNA [NM_000415]	chr12:21532144-21532203	hs|12p12.1	Agilent_HUMAN_G3V2	NM_000415	chr12	21532144	21532203	+
LNCA_24_P103264	0.00273441	2.05129	mRNA	NM_003360	NM_003360	NM_003360	7368	Hs.144197	UGT8	UDP glycosyltransferase 8	ENST00000394511	THC2470851	GO:0003851|GO:0016758|GO:0016020|GO:0008489|GO:0008152|GO:0007422|GO:0016021|GO:0007417	Homo sapiens UDP glycosyltransferase 8 (UGT8), transcript variant 2, mRNA [NM_003360]	chr4:115597201-115597260	hs|4q26	Agilent_HUMAN_G3V2	NM_003360	chr4	115597201	115597260	+
LNCA_24_P149704	0.0342629	2.04999	mRNA	NM_138709	NM_138709	NM_138709	153090	Hs.522378	DAB2IP	DAB2 interacting protein	ENST00000309989	THC2682274	GO:0071902|GO:0005886|GO:0071901|GO:0050680|GO:0048147|GO:0010719|GO:0035414|GO:0042803|GO:0005622|GO:0071889|GO:0046580|GO:0005737|GO:0043407|GO:0045944|GO:0071356|GO:0043507|GO:0090090|GO:0051721|GO:0034261|GO:0043124|GO:0051056|GO:0035591|GO:0043065|GO:0019901|GO:0031235|GO:0042059|GO:0031435|GO:0009967|GO:0032088|GO:0007257|GO:0005123|GO:0000122|GO:0005099|GO:0032320|GO:0071364|GO:0070059|GO:…	Homo sapiens DAB2 interacting protein (DAB2IP), transcript variant 2, mRNA [NM_138709]	chr9:124543789-124544627	hs|9q33.2	Agilent_HUMAN_G3V2	NM_138709	chr9	124543789	124544627	+
LNCA_23_P319005	0.0467994	2.04656	mRNA	NM_015980	NM_015980	NM_015980	51617	Hs.559412	HMP19	HMP19 protein	ENST00000303177	NP075931	GO:0005794|GO:0016020|GO:0032580|GO:0032585|GO:0031410|GO:0016021|GO:0007212|GO:0050780|GO:0030659|GO:0005768	Homo sapiens HMP19 protein (HMP19), mRNA [NM_015980]	chr5:173535800-173535859	hs|5q35.2	Agilent_HUMAN_G3V2	NM_015980	chr5	173535800	173535859	+
LNCA_23_P59738	0.00796542	2.04476	mRNA	NM_021223	NM_021223	NM_021223	58498	Hs.75636	MYL7	myosin, light chain 7, regulatory	ENST00000434895	THC2545457	GO:0030048|GO:0006939|GO:0000146|GO:0043197|GO:0042623|GO:0005509|GO:0016459|GO:0031672	Homo sapiens myosin, light chain 7, regulatory (MYL7), mRNA [NM_021223]	chr7:44179165-44178608	hs|7p13	Agilent_HUMAN_G3V2	NM_021223	chr7	44178608	44179165	-
LNCA_21_P0000163	0.0167774	2.04442	mRNA	NM_001205252	NM_001205252	NM_001205252	NA	Hs.568137	RNF223	ring finger protein 223	ENST00000453464	NA	GO:0016020|GO:0008270|GO:0016021|GO:0046872	Homo sapiens ring finger protein 223 (RNF223), mRNA [NM_001205252]	chr1:1007773-1007714	hs|1p36.33	Agilent_HUMAN_G3V2	NM_001205252	chr1	1007714	1007773	-
LNCA_24_P46130	0.0130237	2.04403	mRNA	NM_001099	NM_001099	NM_001099	55	Hs.433060	ACPP	acid phosphatase, prostate	ENST00000336375	THC2478204	GO:0005622|GO:0016787|GO:0005886|GO:0003993|GO:0008253|GO:0005576|GO:0005765	Homo sapiens acid phosphatase, prostate (ACPP), transcript variant 1, mRNA [NM_001099]	chr3:132077343-132077402	hs|3q22.1	Agilent_HUMAN_G3V2	NM_001099	chr3	132077343	132077402	+
LNCA_23_P38567	0.00747155	2.04377	mRNA	NM_152904	NM_152904	NM_152904	92521	Hs.431045	SPECC1	sperm antigen with calponin homology and coiled-coil domains 1	ENST00000395525	THC2484968	GO:0005634	Homo sapiens sperm antigen with calponin homology and coiled-coil domains 1 (SPECC1), transcript variant 3, mRNA [NM_152904]	chr17:20140333-20140392	hs|17p11.2	Agilent_HUMAN_G3V2	NM_152904	chr17	20140333	20140392	+
LNCA_24_P379750	0.0199	2.04362	mRNA	NM_002357	NM_002357	NM_002357	4084	Hs.468908	MXD1	MAX dimerization protein 1	ENST00000264444	THC2673609	GO:0005739|GO:0003712|GO:0006355|GO:0005737|GO:0003700|GO:0008283|GO:0003714|GO:0005730|GO:0007275|GO:0005634|GO:0003677	Homo sapiens MAX dimerization protein 1 (MXD1), transcript variant 1, mRNA [NM_002357]	chr2:70169884-70169943	hs|2p13.3	Agilent_HUMAN_G3V2	NM_002357	chr2	70169884	70169943	+
LNCA_23_P139669	0.0303801	2.04026	mRNA	NM_006931	NM_006931	NM_006931	6515	Hs.419240	SLC2A3	solute carrier family 2 (facilitated glucose transporter), member 3	ENST00000479059	NP1402385	GO:0015758|GO:0005886|GO:0006766|GO:0005975|GO:0022891|GO:0008643|GO:0006767|GO:0016021|GO:0055085|GO:0005355|GO:0008645	Homo sapiens solute carrier family 2 (facilitated glucose transporter), member 3 (SLC2A3), mRNA [NM_006931]	chr12:8077035-8075591	hs|12p13.31	Agilent_HUMAN_G3V2	NM_006931	chr12	8075591	8077035	-
LNCA_23_P129486	0.0449238	2.0394	mRNA	NM_016332	NM_016332	NM_016332	51734	Hs.655346	SEPX1	selenoprotein X, 1	ENST00000361871	THC2466310	GO:0005737|GO:0008113|GO:0030091|GO:0033743|GO:0016491|GO:0070191|GO:0008270|GO:0005634|GO:0005575|GO:0000318|GO:0046872	Homo sapiens selenoprotein X, 1 (SEPX1), mRNA [NM_016332]	chr16:1988536-1988477	hs|16p13.3	Agilent_HUMAN_G3V2	NM_016332	chr16	1988477	1988536	-
LNCA_33_P3319126	0.0248615	2.03928	mRNA	NM_175710	NM_175710	NM_175710	1379	Hs.655194	CR1L	complement component (3b/4b) receptor 1-like	ENST00000444269	NP1474400	GO:0005737|GO:0016020|GO:0005576	Homo sapiens complement component (3b/4b) receptor 1-like (CR1L), mRNA [NM_175710]	chr1:207874903-207874962	hs|1q32.2	Agilent_HUMAN_G3V2	NM_175710	chr1	207874903	207874962	+
LNCA_21_P0012468	0.00699931	2.03515	mRNA	NR_033945	NR_033945	NR_033945	NA	Hs.408584	LOC647107	uncharacterized LOC647107	ENST00000489012	THC2642747	NA	Homo sapiens uncharacterized LOC647107 (LOC647107), non-coding RNA [NR_033945]	chr3:162917476-162917417	hs|3q26.1	Agilent_HUMAN_G3V2	NR_033945	chr3	162917417	162917476	-
LNCA_24_P228611	0.00276477	2.03503	mRNA	NR_024377	NR_024377	NR_024377	80307	Hs.72222	FER1L4	fer-1-like 4 (C. elegans) pseudogene	ENST00000325076	THC2495204	GO:0016020|GO:0016021	Homo sapiens fer-1-like 4 (C. elegans) pseudogene (FER1L4), non-coding RNA [NR_024377]	chr20:34190945-34190628	hs|20q11.22	Agilent_HUMAN_G3V2	NR_024377	chr20	34190628	34190945	-
LNCA_33_P3692766	0.0187949	2.03403	mRNA	NR_040105	NR_040105	NR_040105	401103	Hs.591304	FLJ46066	uncharacterized LOC401103	ENST00000496220	THC2618352	NA	Homo sapiens uncharacterized LOC401103 (FLJ46066), non-coding RNA [NR_040105]	chr3:182164817-182164758	hs|3q26.33	Agilent_HUMAN_G3V2	NR_040105	chr3	182164758	182164817	-
LNCA_23_P82979	0.00102534	2.03173	mRNA	NM_006059	NM_006059	NM_006059	10319	Hs.201805	LAMC3	laminin, gamma 3	ENST00000462567	THC2471485	GO:0000904|GO:0060041|GO:0016020|GO:0014002|GO:0005198|GO:0005578|GO:0005576|GO:0007155|GO:0007601|GO:0005604	Homo sapiens laminin, gamma 3 (LAMC3), mRNA [NM_006059]	chr9:133967284-133967341	hs|9q34.12	Agilent_HUMAN_G3V2	NM_006059	chr9	133967284	133967341	+
LNCA_21_P0011106	0.0182993	2.03134	mRNA	BX379759	NA	BX379759	NA	Hs.282811	LOC100507055	uncharacterized LOC100507055	NA	THC2784294	NA	BX379759 Homo sapiens PLACENTA COT 25-NORMALIZED Homo sapiens cDNA clone CS0DI039YM08 5-PRIME, mRNA sequence [BX379759]	chr12:133181346-133181287	hs|12q24.33	Agilent_HUMAN_G3V2	BX379759	chr12	133181287	133181346	-
LNCA_23_P258525	0.00314625	2.02632	mRNA	NM_019888	NM_019888	NM_019888	4159	Hs.248018	MC3R	melanocortin 3 receptor	ENST00000243911	THC2602643	GO:0005515|GO:0005886|GO:0004930|GO:0030819|GO:0007200|GO:0004977|GO:0042923|GO:0005887|GO:0007187|GO:0004980|GO:0004872|GO:0007188|GO:0004871|GO:0017046	Homo sapiens melanocortin 3 receptor (MC3R), mRNA [NM_019888]	chr20:54824176-54824235	hs|20q13.2	Agilent_HUMAN_G3V2	NM_019888	chr20	54824176	54824235	+
LNCA_23_P86653	0.0201423	2.02395	mRNA	NM_002727	NM_002727	NM_002727	5552	Hs.1908	SRGN	serglycin	ENST00000462445	THC2610349	GO:0005515|GO:0005794|GO:0005518|GO:0006915|GO:0030168|GO:0005576|GO:0050710|GO:0030502|GO:0031214|GO:0005615|GO:0042629|GO:0042588|GO:0000139|GO:0007596|GO:0016485|GO:0002576|GO:0033373|GO:0031093|GO:0033382|GO:0033364|GO:0033371	Homo sapiens serglycin (SRGN), transcript variant 1, mRNA [NM_002727]	chr10:70863833-70863892	hs|10q22.1	Agilent_HUMAN_G3V2	NM_002727	chr10	70863833	70863892	+
LNCA_32_P153773	0.0248702	2.01772	mRNA	NM_000718	NM_000718	NM_000718	774	Hs.495522	CACNA1B	calcium channel, voltage-dependent, N type, alpha 1B subunit	ENST00000371372	THC2624817	GO:0005515|GO:0005244|GO:0051899|GO:0005245|GO:0005886|GO:0007268|GO:0008022|GO:0055085|GO:0005524|GO:0005891|GO:0000166|GO:0006810|GO:0051925|GO:0016021|GO:0006811	Homo sapiens calcium channel, voltage-dependent, N type, alpha 1B subunit (CACNA1B), transcript variant 1, mRNA [NM_000718]	chr9:141018581-141018640	hs|9q34.3	Agilent_HUMAN_G3V2	NM_000718	chr9	141018581	141018640	+
LNCA_21_P0010532	0.00436193	2.01655	mRNA	ENST00000425517	NA	BX117229	NA	Hs.127911	XLOC_l2_000253	NA	ENST00000425517	THC2661877	NA	BX117229 Soares_NFL_T_GBC_S1 Homo sapiens cDNA clone IMAGp998I184005, mRNA sequence [BX117229]	chr1:69550943-69554218	hs|1p31.2	Agilent_HUMAN_G3V2	ENST00000425517	chr1	69550943	69554218	+
LNCA_23_P132910	0.0302098	2.0163	mRNA	NM_019027	NM_019027	NM_019027	54502	Hs.518727	RBM47	RNA binding motif protein 47	ENST00000510871	THC2467007	GO:0000166|GO:0003723|GO:0005634	Homo sapiens RNA binding motif protein 47 (RBM47), transcript variant 2, mRNA [NM_019027]	chr4:40426236-40426177	hs|4p14	Agilent_HUMAN_G3V2	NM_019027	chr4	40426177	40426236	-
LNCA_21_P0003159	0.0125993	2.01459	mRNA	ENST00000473959	NA	DA558726	NA	Hs.603642	CCDC80	coiled-coil domain containing 80	ENST00000473959	NA	GO:0030198|GO:0010811|GO:0005576|GO:0005614|GO:0001968|GO:0008201|GO:0005604	DA558726 HCHON2 Homo sapiens cDNA clone HCHON2009694 5', mRNA sequence [DA558726]	chr3:112362245-112362186	hs|3q13.2	Agilent_HUMAN_G3V2	ENST00000473959	chr3	112362186	112362245	-
LNCA_33_P3330074	0.000152229	2.01337	mRNA	ENST00000399582	NA	AB231779	NA	Hs.690732	NA	NA	ENST00000399582	THC2683056	NA	transient receptor potential cation channel, subfamily C, member 2, pseudogene [Source:HGNC Symbol;Acc:12334] [ENST00000399582]	chr11:3647657-3647716	hs|11p15.4	Agilent_HUMAN_G3V2	ENST00000399582	chr11	3647657	3647716	+
LNCA_21_P0009260	0.0220848	2.01334	mRNA	BG201282	NA	BG201282	NA	Hs.560494	XLOC_012256	NA	NA	NA	NA	RST20610 Athersys RAGE Library Homo sapiens cDNA, mRNA sequence [BG201282]	chr17:053930053-053930112	hs|17q22	Agilent_HUMAN_G3V2	BG201282	chr17	53930053	53930112	+
LNCA_33_P3775281	0.0295204	2.013	mRNA	AK055260	NA	AK055260	644050	Hs.651888	LOC644050	uncharacterized LOC644050	NA	THC2637220	NA	Homo sapiens cDNA FLJ30698 fis, clone FCBBF2000825. [AK055260]	chr19:36279837-36279778	hs|19q13.12	Agilent_HUMAN_G3V2	AK055260	chr19	36279778	36279837	-
LNCA_23_P22565	0.0314993	2.00975	mRNA	NM_033085	NM_033085	NM_033085	89885	Hs.301960	FATE1	fetal and adult testis expressed 1	ENST00000370350	THC2463873	GO:0016020|GO:0005783|GO:0016021	Homo sapiens fetal and adult testis expressed 1 (FATE1), mRNA [NM_033085]	chrX:150890420-150891125	hs|Xq28	Agilent_HUMAN_G3V2	NM_033085	chrX	150890420	150891125	+
LNCA_23_P367586	0.00307194	2.00807	mRNA	NM_173589	NM_173589	NM_173589	144132	Hs.720080	DNHD1	dynein heavy chain domain 1	ENST00000472080	THC2485313	GO:0030286|GO:0003777|GO:0007018	Homo sapiens dynein heavy chain domain 1 (DNHD1), transcript variant 2, mRNA [NM_173589]	chr11:6541379-6541438	hs|11p15.4	Agilent_HUMAN_G3V2	NM_173589	chr11	6541379	6541438	+
LNCA_24_P152325	0.0222174	2.00666	mRNA	NA	NA	NA	NA	NA	NA	NA	NA	NA	NA	NA	chr7:005600401-005600460	hs|7p22.1	Agilent_HUMAN_G3V2	NA	chr7	5600401	5600460	+
LNCA_32_P19294	0.00742083	2.00632	mRNA	NM_144669	NM_144669	NM_144669	144423	Hs.655668	GLT1D1	glycosyltransferase 1 domain containing 1	ENST00000441390	THC2472350	GO:0005737|GO:0009058|GO:0016757|GO:0005576	Homo sapiens glycosyltransferase 1 domain containing 1 (GLT1D1), mRNA [NM_144669]	chr12:129469286-129469345	hs|12q24.33	Agilent_HUMAN_G3V2	NM_144669	chr12	129469286	129469345	+
LNCA_21_P0010183	0.0265676	2.00573	mRNA	NR_024090	NR_024090	NR_024090	NA	Hs.576551	LINC00320	long intergenic non-protein coding RNA 320	ENST00000419299	THC2651465	NA	Homo sapiens long intergenic non-protein coding RNA 320 (LINC00320), non-coding RNA [NR_024090]	chr21:22116117-22116058	hs|21q21.1	Agilent_HUMAN_G3V2	NR_024090	chr21	22116058	22116117	-
LNCA_33_P3334155	0.0300803	2.0028	mRNA	AK127831	NA	AK127831	100652791	Hs.369771	LOC100652791	uncharacterized LOC100652791	NA	THC2624622	NA	Homo sapiens cDNA FLJ45934 fis, clone PLACE7003684. [AK127831]	chr8:6692733-6692792	hs|8p23.1	Agilent_HUMAN_G3V2	AK127831	chr8	6692733	6692792	+
LNCA_33_P3210904	0.0172317	2.00226	mRNA	AK095629	NA	AK095629	6396	NA	SEC13	SEC13 homolog (S. cerevisiae)	ENST00000397101	THC2509556	GO:0005515|GO:0012507|GO:0000236|GO:0002474|GO:0005783|GO:0005634|GO:0048208|GO:0031410|GO:0005635|GO:0006886|GO:0005829|GO:0006888|GO:0016020|GO:0031080|GO:0000087|GO:0005789|GO:0000776|GO:0051028|GO:0016192|GO:0000278|GO:0044267|GO:0016044|GO:0043687|GO:0018279	Homo sapiens cDNA FLJ38310 fis, clone FCBBF3019839, highly similar to SEC13-RELATED PROTEIN. [AK095629]	chr3:10356718-10356659	hs|3p25.3	Agilent_HUMAN_G3V2	AK095629	chr3	10356659	10356718	-
LNCA_23_P121064	0.00891345	2.00196	mRNA	NM_002852	NM_002852	NM_002852	5806	Hs.591286	PTX3	pentraxin 3, long	ENST00000295927	THC2462788	GO:0050766|GO:0006954|GO:0005576|GO:0001872|GO:0001878|GO:0008228|GO:0045429	Homo sapiens pentraxin 3, long (PTX3), mRNA [NM_002852]	chr3:157160969-157161028	hs|3q25.32	Agilent_HUMAN_G3V2	NM_002852	chr3	157160969	157161028	+
LNCA_23_P41314	0.0414138	2.00038	mRNA	NM_000128	NM_000128	NM_000128	2160	Hs.1430	F11	coagulation factor XI	ENST00000403665	THC2474936	GO:0005515|GO:0004252|GO:0005886|GO:0051919|GO:0005576|GO:0005615|GO:0016020|GO:0030193|GO:0007596|GO:0007597|GO:0006508|GO:0031639|GO:0008233|GO:0008201	Homo sapiens coagulation factor XI (F11), mRNA [NM_000128]	chr4:187209847-187209906	hs|4q35.2	Agilent_HUMAN_G3V2	NM_000128	chr4	187209847	187209906	+
LNCA_32_P205624	0.0182309	2.00019	mRNA	NM_012435	NM_012435	NM_012435	25759	Hs.30965	SHC2	SHC (Src homology 2 domain containing) transforming protein 2	ENST00000264554	THC2742709	GO:0035556|GO:0008286|GO:0048011|GO:0007265|GO:0005575|GO:0005829	Homo sapiens SHC (Src homology 2 domain containing) transforming protein 2 (SHC2), mRNA [NM_012435]	chr19:416892-416833	hs|19p13.3	Agilent_HUMAN_G3V2	NM_012435	chr19	416833	416892	-
LNCA_23_P129665	0.00703679	14.0473	mRNA	NM_005353	NM_005353	NM_005353	3681	Hs.679163	ITGAD	integrin, alpha D	ENST00000389202	THC2601106	GO:0008305|GO:0016337|GO:0006955|GO:0046982|GO:0007160|GO:0005886|GO:0007229|GO:0050798|GO:0004872|GO:0016021	Homo sapiens integrin, alpha D (ITGAD), mRNA [NM_005353]	chr16:31437568-31437627	hs|16p11.2	Agilent_HUMAN_G3V2	NM_005353	chr16	31437568	31437627	+
LNCA_24_P778906	0.0161611	8.36516	mRNA	ENST00000435913	XR_110942	XR_110942	NA	NA	NA	NA	ENST00000435913	THC2529780	NA	NA	chr1:143194160-143194106	hs|1q21.1	Agilent_HUMAN_G3V2	ENST00000435913	chr1	143194106	143194160	-
LNCA_23_P2543	0.0419637	8.34632	mRNA	NM_015267	NM_015267	NM_015267	23316	Hs.124953	CUX2	cut-like homeobox 2	ENST00000261726	THC2692638	GO:0043565|GO:0006355|GO:0003700|GO:0005634|GO:0045892	Homo sapiens cut-like homeobox 2 (CUX2), mRNA [NM_015267]	chr12:111788124-111788183	hs|12q24.12	Agilent_HUMAN_G3V2	NM_015267	chr12	111788124	111788183	+
LNCA_32_P178758	0.0334175	8.06782	mRNA	NR_026970	NR_026970	NR_026970	285780	Hs.655737	LY86-AS1	LY86 antisense RNA 1 (non-protein coding)	ENST00000429345	THC2503159	NA	Homo sapiens LY86 antisense RNA 1 (non-protein coding) (LY86-AS1), non-coding RNA [NR_026970]	chr6:6346843-6346784	hs|6p25.1	Agilent_HUMAN_G3V2	NR_026970	chr6	6346784	6346843	-
LNCA_33_P3246258	0.014216	7.90901	mRNA	ENST00000400449	NA	AK129520	NA	Hs.675058	NA	NA	ENST00000400449	NP852850	NA	Uncharacterized protein [Source:UniProtKB/TrEMBL;Acc:E7ETR8] [ENST00000400449]	chr21:43314197-43314138	hs|21q22.3	Agilent_HUMAN_G3V2	ENST00000400449	chr21	43314138	43314197	-
LNCA_33_P3390960	0.037462	7.88048	mRNA	AK095683	NA	AK095683	389362	Hs.207069	PSMG4	proteasome (prosome, macropain) assembly chaperone 4	ENST00000454610	THC2477851	NA	Homo sapiens cDNA FLJ38364 fis, clone FEBRA2000909. [AK095683]	chr6:3292027-3292086	hs|6p25.2	Agilent_HUMAN_G3V2	AK095683	chr6	3292027	3292086	+
LNCA_23_P65629	0.0219174	7.87919	mRNA	NM_021161	NM_021161	NM_021161	54207	Hs.560255	KCNK10	potassium channel, subfamily K, member 10	ENST00000319231	THC2477547	GO:0007165|GO:0005244|GO:0005886|GO:0006810|GO:0007268|GO:0005267|GO:0016021|GO:0006813|GO:0071805|GO:0006811	Homo sapiens potassium channel, subfamily K, member 10 (KCNK10), transcript variant 1, mRNA [NM_021161]	chr14:88651394-88651335	hs|14q31.3	Agilent_HUMAN_G3V2	NM_021161	chr14	88651335	88651394	-
LNCA_33_P3384628	0.0104485	7.6703	mRNA	NA	NA	NA	NA	NA	NA	NA	NA	NA	NA	NA	chr21:015278286-015278227	hs|21q11.2	Agilent_HUMAN_G3V2	NA	chr21	15278227	15278286	-
LNCA_32_P48825	0.00832595	7.65643	mRNA	NM_080747	NM_080747	NM_080747	140807	Hs.662013	KRT72	keratin 72	ENST00000354310	THC2478424	GO:0005198|GO:0045095	Homo sapiens keratin 72 (KRT72), transcript variant 1, mRNA [NM_080747]	chr12:52979630-52979571	hs|12q13.13	Agilent_HUMAN_G3V2	NM_080747	chr12	52979571	52979630	-
LNCA_21_P0000900	0.0162483	7.34281	mRNA	NR_040093	NR_040093	NR_040093	NA	Hs.730814	LOC100505678	uncharacterized LOC100505678	NA	NA	NA	Homo sapiens uncharacterized LOC100505678 (LOC100505678), non-coding RNA [NR_040093]	chr5:111075333-111075392	hs|5q22.1	Agilent_HUMAN_G3V2	NR_040093	chr5	111075333	111075392	+
LNCA_33_P3342752	0.0122337	7.26217	mRNA	ENST00000366873	NA	NA	NA	NA	NA	NA	ENST00000366873	THC2675303	NA	calpain 8 [Source:HGNC Symbol;Acc:1485] [ENST00000366873]	chr1:223805100-223805041	hs|1q41	Agilent_HUMAN_G3V2	ENST00000366873	chr1	223805041	223805100	-
LNCA_21_P0003418	0.00604632	6.95127	mRNA	ENST00000507949	NA	BX101262	NA	Hs.149078	XLOC_003736	NA	ENST00000507949	THC2775538	NA	BX101262 Soares_NFL_T_GBC_S1 Homo sapiens cDNA clone IMAGp998N034537, mRNA sequence [BX101262]	chr4:152865023-152865082	hs|4q31.3	Agilent_HUMAN_G3V2	ENST00000507949	chr4	152865023	152865082	+
LNCA_24_P751492	0.00742328	6.9028	mRNA	NM_001012446	NM_001012446	NM_001012446	392307	Hs.128075	C9orf128	chromosome 9 open reading frame 128	ENST00000423537	THC2602754	NA	Homo sapiens chromosome 9 open reading frame 128 (C9orf128), mRNA [NM_001012446]	chr9:35818494-35818435	hs|9p13.3	Agilent_HUMAN_G3V2	NM_001012446	chr9	35818435	35818494	-
LNCA_33_P3307836	0.00642481	6.86073	mRNA	ENST00000370958	NA	BC080568	57554	Hs.479658	LRRC7	leucine rich repeat containing 7	ENST00000370958	THC2607617	GO:0005737	leucine rich repeat containing 7 [Source:HGNC Symbol;Acc:18531] [ENST00000370958]	chr1:70144101-70144160	hs|1p31.1	Agilent_HUMAN_G3V2	ENST00000370958	chr1	70144101	70144160	+
LNCA_21_P0000016	0.00827703	6.7866	mRNA	NM_001146225	NM_001146225	NM_001146225	NA	Hs.662013	KRT72	keratin 72	ENST00000398066	THC2478424	GO:0005198|GO:0045095	Homo sapiens keratin 72 (KRT72), transcript variant 2, mRNA [NM_001146225]	chr12:52986207-52985381	hs|12q13.13	Agilent_HUMAN_G3V2	NM_001146225	chr12	52985381	52986207	-
LNCA_23_P398530	0.0383966	6.33373	mRNA	NM_133334	NM_133334	NM_133334	7468	Hs.113876	WHSC1	Wolf-Hirschhorn syndrome candidate 1	ENST00000503128	THC2505590	GO:0006355|GO:0031965|GO:0005694|GO:0008168|GO:0005730|GO:0005634|GO:0003677|GO:0009653|GO:0046872|GO:0018024|GO:0005737|GO:0008270|GO:0016740|GO:0016568	Homo sapiens Wolf-Hirschhorn syndrome candidate 1 (WHSC1), transcript variant 7, mRNA [NM_133334]	chr4:1949509-1949568	hs|4p16.3	Agilent_HUMAN_G3V2	NM_133334	chr4	1949509	1949568	+
LNCA_23_P2616	0.0114935	6.14032	mRNA	NM_130441	NM_130441	NM_130441	170482	Hs.351812	CLEC4C	C-type lectin domain family 4, member C	ENST00000360345	NP957271	GO:0016020|GO:0005488|GO:0045087|GO:0005529|GO:0016021	Homo sapiens C-type lectin domain family 4, member C (CLEC4C), transcript variant 1, mRNA [NM_130441]	chr12:7883502-7883443	hs|12p13.31	Agilent_HUMAN_G3V2	NM_130441	chr12	7883443	7883502	-
LNCA_33_P3389668	0.00456908	5.81927	mRNA	NA	NA	NA	NA	NA	NA	NA	NA	NA	NA	NA	chr1:145931784-145931725	hs|1q21.1	Agilent_HUMAN_G3V2	NA	chr1	145931725	145931784	-
LNCA_33_P3380383	0.00430601	5.59241	mRNA	NM_001099221	NM_001099221	NM_001099221	497189	Hs.552091	TIFAB	TRAF-interacting protein with forkhead-associated domain, family member B	ENST00000537858	THC2658671	NA	Homo sapiens TRAF-interacting protein with forkhead-associated domain, family member B (TIFAB), mRNA [NM_001099221]	chr5:134784664-134784605	hs|5q31.1	Agilent_HUMAN_G3V2	NM_001099221	chr5	134784605	134784664	-
LNCA_32_P202182	0.00462304	5.54174	mRNA	NR_003664	NR_003664	NR_003664	389517	Hs.711232	SPDYE8P	speedy homolog E8 (Xenopus laevis), pseudogene	NA	THC2578046	NA	Homo sapiens speedy homolog E8 (Xenopus laevis), pseudogene (SPDYE8P), non-coding RNA [NR_003664]	chr7:72498539-72498480	hs|7q11.23	Agilent_HUMAN_G3V2	NR_003664	chr7	72498480	72498539	-
LNCA_33_P3414022	0.0382121	5.52509	mRNA	NA	NA	NA	NA	NA	NA	NA	NA	NA	NA	NA	chr1:144916590-144916531	hs|1q21.1	Agilent_HUMAN_G3V2	NA	chr1	144916531	144916590	-
LNCA_33_P3234202	0.0148728	5.51938	mRNA	NM_004944	NM_004944	NM_004944	1776	Hs.476453	DNASE1L3	deoxyribonuclease I-like 3	ENST00000394549	THC2493473	GO:0006308|GO:0004536|GO:0016787|GO:0006309|GO:0005509|GO:0006915|GO:0005634|GO:0006259|GO:0016888|GO:0003677	Homo sapiens deoxyribonuclease I-like 3 (DNASE1L3), mRNA [NM_004944]	chr3:58178414-58178355	hs|3p14.3	Agilent_HUMAN_G3V2	NM_004944	chr3	58178355	58178414	-
LNCA_21_P0013024	0.0305904	5.49587	mRNA	THC2642537	NA	NA	NA	NA	XLOC_l2_012552	NA	NA	THC2642537	NA	Q2Q5T5_MOUSE (Q2Q5T5) Embryonic stem cell-and germ cell-specific protein ESGP, complete [THC2642537]	chr6:044185861-044185920	hs|6p21.1	Agilent_HUMAN_G3V2	THC2642537	chr6	44185861	44185920	+
LNCA_33_P3226955	0.0154812	5.33555	mRNA	ENST00000374818	NA	NA	8829	NA	NRP1	neuropilin 1	ENST00000374818	THC2768644	GO:0048843|GO:0050731|GO:0060301|GO:0030154|GO:0007507|GO:0002116|GO:0007413|GO:0017154|GO:0007411|GO:0043025|GO:0009887|GO:0009986|GO:0007275|GO:0016358|GO:0048485|GO:0010595|GO:0043235|GO:0019955|GO:0021636|GO:0071526|GO:0030424|GO:0035767|GO:0005886|GO:0005883|GO:0007267|GO:0046872|GO:0014911|GO:0005829|GO:0030426|GO:0019838|GO:0035729|GO:0060666|GO:0004872|GO:0005021|GO:0060627|GO:0007155|GO:…	neuropilin 1 [Source:HGNC Symbol;Acc:8004] [ENST00000374818]	chr10:33538421-33538362	hs|10p11.22	Agilent_HUMAN_G3V2	ENST00000374818	chr10	33538362	33538421	-
LNCA_24_P12690	0.0199791	5.28056	mRNA	NM_194294	NM_194294	NM_194294	169355	Hs.676257	IDO2	indoleamine 2,3-dioxygenase 2	ENST00000343295	THC2611429	GO:0034641|GO:0006569|GO:0005737|GO:0004833|GO:0019441|GO:0033754|GO:0016491|GO:0046872|GO:0020037|GO:0005829	Homo sapiens indoleamine 2,3-dioxygenase 2 (IDO2), mRNA [NM_194294]	chr8:39873692-39873751	hs|8p11.21	Agilent_HUMAN_G3V2	NM_194294	chr8	39873692	39873751	+
LNCA_23_P56578	0.00728847	5.21221	mRNA	NM_053276	NM_053276	NM_053276	5212	Hs.137415	VIT	vitrin	ENST00000379242	NP481077	GO:0005578|GO:0005576	Homo sapiens vitrin (VIT), transcript variant 1, mRNA [NM_053276]	chr2:37041766-37041825	hs|2p22.2	Agilent_HUMAN_G3V2	NM_053276	chr2	37041766	37041825	+
LNCA_33_P3342563	0.012059	5.17873	mRNA	NM_031220	NM_031220	NM_031220	83394	Hs.183983	PITPNM3	PITPNM family member 3	ENST00000421306	THC2639271	GO:0005515|GO:0030971|GO:0016020|GO:0008526|GO:0046488|GO:0005509|GO:0016021|GO:0012505|GO:0008289	Homo sapiens PITPNM family member 3 (PITPNM3), transcript variant 1, mRNA [NM_031220]	chr17:6354644-6354585	hs|17p13.2	Agilent_HUMAN_G3V2	NM_031220	chr17	6354585	6354644	-
LNCA_32_P68942	0.0368725	5.16433	mRNA	NR_040113	NR_040113	NR_040113	440482	Hs.364456	ANKRD20A5P	ankyrin repeat domain 20 family, member A5, pseudogene	ENST00000344693	THC2568860	NA	Homo sapiens ankyrin repeat domain 20 family, member A5, pseudogene (ANKRD20A5P), non-coding RNA [NR_040113]	chr18:14179379-14179438	hs|18p11.21	Agilent_HUMAN_G3V2	NR_040113	chr18	14179379	14179438	+
LNCA_33_P3256322	0.0144974	5.11548	mRNA	CR989582	NA	CR989582	NA	Hs.728692	NA	NA	NA	NA	NA	CR989582 RZPD no.9016 Homo sapiens cDNA clone RZPDp9016I0710 5', mRNA sequence [CR989582]	chr14:106477693-106477752	hs|14q32.33	Agilent_HUMAN_G3V2	CR989582	chr14	106477693	106477752	+
LNCA_23_P146456	0.00158771	5.11065	mRNA	NM_001333	NM_001333	NM_001333	1515	Hs.610096	CTSL2	cathepsin L2	ENST00000259470	THC2499457	GO:0014070|GO:0030984|GO:0043005|GO:0048102|GO:0010259|GO:0021675|GO:0007283|GO:0005764|GO:0046697|GO:0060008|GO:0005737|GO:0007154|GO:0006508|GO:0043204|GO:0030141|GO:0009267|GO:0005773|GO:0042277|GO:0045177|GO:0051384|GO:0005625|GO:0034698|GO:0009749|GO:0004197|GO:0005902|GO:0004177|GO:0008233|GO:0008234|GO:0009897	Homo sapiens cathepsin L2 (CTSL2), transcript variant 1, mRNA [NM_001333]	chr9:99795211-99795152	hs|9q22.33	Agilent_HUMAN_G3V2	NM_001333	chr9	99795152	99795211	-
LNCA_24_P411749	0.0311171	5.05514	mRNA	NM_020455	NM_020455	NM_020455	57211	Hs.726094	GPR126	G protein-coupled receptor 126	ENST00000367609	NP1146979	GO:0007186|GO:0005886|GO:0007218|GO:0004930|GO:0004872|GO:0016021|GO:0004871	Homo sapiens G protein-coupled receptor 126 (GPR126), transcript variant a1, mRNA [NM_020455]	chr6:142766903-142766962	hs|6q24.1	Agilent_HUMAN_G3V2	NM_020455	chr6	142766903	142766962	+
LNCA_21_P0004475	0.0214322	5.0328	mRNA	AL040234	NA	AL040234	NA	Hs.558746	XLOC_005101	NA	NA	THC2522317	NA	DKFZp434H0913_s1 434 (synonym: htes3) Homo sapiens cDNA clone DKFZp434H0913, mRNA sequence [AL040234]	chr5:175546618-175546559	hs|5q35.2	Agilent_HUMAN_G3V2	AL040234	chr5	175546559	175546618	-
LNCA_19_P00322835	0.00314412	4.98841	mRNA	ENST00000520048	NA	BC026098	NA	Hs.652026	XLOC_007221	NA	ENST00000520048	THC2723970	NA	602146618F1 NIH_MGC_62 Homo sapiens cDNA clone IMAGE:4305364 5', mRNA sequence [BF976785]	chr8:130382610-130365225	hs|8q24.21	Agilent_HUMAN_G3V2	ENST00000520048	chr8	130365225	130382610	-
LNCA_33_P3219745	0.0391294	4.92582	mRNA	ENST00000368681	NA	NA	3608	NA	ILF2	interleukin enhancer binding factor 2, 45kDa	ENST00000368681	THC2652687	GO:0005515|GO:0003725|GO:0006955|GO:0005737|GO:0030529|GO:0005730|GO:0005634|GO:0045893|GO:0005524|GO:0003677|GO:0016740|GO:0006351	interleukin enhancer binding factor 2, 45kDa [Source:HGNC Symbol;Acc:6037] [ENST00000368681]	chr1:153640020-153639961	hs|1q21.3	Agilent_HUMAN_G3V2	ENST00000368681	chr1	153639961	153640020	-
LNCA_33_P3249081	0.00135004	4.91904	mRNA	NM_015082	NM_015082	NM_015082	23105	Hs.483390	FSTL4	follistatin-like 4	ENST00000360575	THC2666328	GO:0005509|GO:0005576	Homo sapiens follistatin-like 4 (FSTL4), mRNA [NM_015082]	chr5:132532235-132532176	hs|5q31.1	Agilent_HUMAN_G3V2	NM_015082	chr5	132532176	132532235	-
LNCA_21_P0012182	0.0271155	4.88494	mRNA	NR_027995	NR_027995	NR_027995	NA	Hs.694496	ANKRD20A9P	ankyrin repeat domain 20 family, member A9, pseudogene	ENST00000432875	THC2587008	NA	Homo sapiens ankyrin repeat domain 20 family, member A9, pseudogene (ANKRD20A9P), non-coding RNA [NR_027995]	chr13:19415809-19415750	hs|13q11	Agilent_HUMAN_G3V2	NR_027995	chr13	19415750	19415809	-
LNCA_23_P380526	0.00209111	4.86863	mRNA	NM_018189	NM_018189	NM_018189	55211	Hs.317659	DPPA4	developmental pluripotency associated 4	ENST00000475135	THC2482155	GO:0005515|GO:0007275|GO:0005634	Homo sapiens developmental pluripotency associated 4 (DPPA4), mRNA [NM_018189]	chr3:109045987-109045928	hs|3q13.13	Agilent_HUMAN_G3V2	NM_018189	chr3	109045928	109045987	-
LNCA_33_P3231157	0.0163066	4.68511	mRNA	ENST00000463480	NA	AF348999	NA	Hs.679600	NA	NA	ENST00000463480	NP1460832	NA	metallothionein 1D, pseudogene [Source:HGNC Symbol;Acc:7396] [ENST00000463480]	chr16:56679093-56679152	hs|16q12.2	Agilent_HUMAN_G3V2	ENST00000463480	chr16	56679093	56679152	+
LNCA_33_P3294459	0.0112776	4.68196	mRNA	NR_024086	NR_024086	NR_024086	53844	Hs.715567	COPG2IT1	COPG2 imprinted transcript 1 (non-protein coding)	NA	THC2556214	NA	Homo sapiens COPG2 imprinted transcript 1 (non-protein coding) (COPG2IT1), non-coding RNA [NR_024086]	NA	NA	Agilent_HUMAN_G3V2	NR_024086	NA	NA	NA	+
LNCA_23_P252541	0.0193674	4.65692	mRNA	NM_177403	NM_177403	NM_177403	338382	Hs.534612	RAB7B	RAB7B, member RAS oncogene family	NA	THC2603259	GO:0000166|GO:0007264|GO:0015031|GO:0005525|GO:0005764	Homo sapiens RAB7B, member RAS oncogene family (RAB7B), transcript variant 1, mRNA [NM_177403]	NA	NA	Agilent_HUMAN_G3V2	NM_177403	NA	NA	NA	+
LNCA_21_P0013164	0.0025527	4.63544	mRNA	NR_028093	NR_028093	NR_028093	NA	NA	LPAL2	lipoprotein, Lp(a)-like 2, pseudogene	ENST00000435757	THC2562648	GO:0008150|GO:0003674|GO:0005576|GO:0005575	Homo sapiens lipoprotein, Lp(a)-like 2, pseudogene (LPAL2), transcript variant 2, non-coding RNA [NR_028093]	chr6:160898166-160887996	hs|6q25.3	Agilent_HUMAN_G3V2	NR_028093	chr6	160887996	160898166	-
LNCA_23_P134663	0.0328187	4.5641	mRNA	NM_024812	NM_024812	NM_024812	79870	Hs.533446	BAALC	brain and acute leukemia, cytoplasmic	ENST00000309982	THC2466021	GO:0005813|GO:0005737|GO:0016020|GO:0005730|GO:0005634	Homo sapiens brain and acute leukemia, cytoplasmic (BAALC), transcript variant 1, mRNA [NM_024812]	chr8:104242447-104242506	hs|8q22.3	Agilent_HUMAN_G3V2	NM_024812	chr8	104242447	104242506	+
LNCA_32_P150086	0.0289377	4.54322	mRNA	NR_040113	NR_040113	NR_040113	440482	NA	ANKRD20A5P	ankyrin repeat domain 20 family, member A5, pseudogene	NA	THC2571725	NA	Homo sapiens ankyrin repeat domain 20 family, member A5, pseudogene (ANKRD20A5P), non-coding RNA [NR_040113]	chr18:14225703-14225762	hs|18p11.21	Agilent_HUMAN_G3V2	NR_040113	chr18	14225703	14225762	+
LNCA_32_P47157	0.0130804	4.54165	mRNA	NR_024006	NR_024006	NR_024006	92973	Hs.12509	FP588	uncharacterized LOC92973	NA	THC2601269	NA	Homo sapiens uncharacterized LOC92973 (FP588), non-coding RNA [NR_024006]	chr9:35865315-35865374	hs|9p13.3	Agilent_HUMAN_G3V2	NR_024006	chr9	35865315	35865374	+
LNCA_24_P15898	0.0111701	4.49672	mRNA	BC027909	NA	BC027909	574407	Hs.650039	C1orf145	chromosome 1 open reading frame 145	ENST00000295012	THC2605806	NA	Homo sapiens chromosome 1 open reading frame 145, mRNA (cDNA clone IMAGE:5204063). [BC027909]	chr1:228391363-228391304	hs|1q42.13	Agilent_HUMAN_G3V2	BC027909	chr1	228391304	228391363	-
LNCA_32_P161033	0.0398294	4.45566	mRNA	ENST00000433980	NA	BC043411	NA	Hs.446446	NA	NA	ENST00000433980	THC2493596	NA	Homo sapiens, clone IMAGE:6155889, mRNA. [BC043411]	chr1:143403643-143403702	hs|1q21.1	Agilent_HUMAN_G3V2	ENST00000433980	chr1	143403643	143403702	+
LNCA_33_P3391796	0.0396702	4.38607	mRNA	NM_005450	NM_005450	NM_005450	9241	Hs.248201	NOG	noggin	ENST00000332822	THC2481541	GO:0007389|GO:0001657|GO:0060044|GO:0001655|GO:0048706|GO:0060302|GO:0005615|GO:0032403|GO:2000313|GO:0042803|GO:0048646|GO:0090193|GO:0050679|GO:0030336|GO:0001706|GO:0001707|GO:0001843|GO:0030509|GO:0000122|GO:0001701|GO:0001649|GO:0061053|GO:0008045|GO:0001501|GO:0060825|GO:0019955|GO:0060272|GO:0042060|GO:0060173|GO:0042733|GO:0021533|GO:0021510|GO:0060425|GO:0021983|GO:0001839|GO:0009953|GO:…	Homo sapiens noggin (NOG), mRNA [NM_005450]	chr17:54672456-54672515	hs|17q22	Agilent_HUMAN_G3V2	NM_005450	chr17	54672456	54672515	+
LNCA_32_P204376	0.00542263	4.34197	mRNA	NM_001012421	NM_001012421	NM_001012421	441430	Hs.632663	ANKRD20A2	ankyrin repeat domain 20 family, member A2	ENST00000377477	THC2571725	NA	Homo sapiens ankyrin repeat domain 20 family, member A2 (ANKRD20A2), mRNA [NM_001012421]	chr9:42410921-42410980	hs|9p12	Agilent_HUMAN_G3V2	NM_001012421	chr9	42410921	42410980	+
LNCA_33_P3570974	0.0380598	4.33559	mRNA	BC043205	NA	BC043205	340414	Hs.667366	C8orf50	chromosome 8 open reading frame 50	NA	THC2606611	NA	Homo sapiens chromosome 8 open reading frame 50, mRNA (cDNA clone IMAGE:5295006). [BC043205]	chr8:28553818-28553759	hs|8p21.1	Agilent_HUMAN_G3V2	BC043205	chr8	28553759	28553818	-
LNCA_21_P0012183	0.0461313	4.33559	mRNA	NR_040113	NR_040113	NR_040113	NA	NA	ANKRD20A5P	ankyrin repeat domain 20 family, member A5, pseudogene	ENST00000432875	THC2587008	NA	Homo sapiens ankyrin repeat domain 20 family, member A5, pseudogene (ANKRD20A5P), non-coding RNA [NR_040113]	chr18:14218441-14218500	hs|18p11.21	Agilent_HUMAN_G3V2	NR_040113	chr18	14218441	14218500	+
LNCA_23_P378416	0.00631346	4.31966	mRNA	NM_001001996	NM_001001996	NM_001001996	2824	Hs.495710	GPM6B	glycoprotein M6B	ENST00000356942	THC2466323	GO:0003674|GO:0016020|GO:0007275|GO:0016021|GO:0030154|GO:0007399	Homo sapiens glycoprotein M6B (GPM6B), transcript variant 2, mRNA [NM_001001996]	chrX:13792323-13792264	hs|Xp22.2	Agilent_HUMAN_G3V2	NM_001001996	chrX	13792264	13792323	-
LNCA_23_P407096	0.0423012	4.28406	mRNA	NM_152625	NM_152625	NM_152625	167465	Hs.370303	ZNF366	zinc finger protein 366	ENST00000318442	THC2473757	GO:0005622|GO:0006355|GO:0008270|GO:0005634|GO:0003677|GO:0046872	Homo sapiens zinc finger protein 366 (ZNF366), mRNA [NM_152625]	chr5:71739339-71739280	hs|5q13.2	Agilent_HUMAN_G3V2	NM_152625	chr5	71739280	71739339	-
LNCA_24_P932594	0.0354933	4.26843	mRNA	NM_014683	NM_014683	NM_014683	9706	Hs.168762	ULK2	unc-51-like kinase 2 (C. elegans)	NA	THC2500928	GO:0005515|GO:0007409|GO:0031410|GO:0005524|GO:0007399|GO:0007165|GO:0034045|GO:0042594|GO:0046777|GO:0000166|GO:0004674|GO:0010506|GO:0030659	Homo sapiens unc-51-like kinase 2 (C. elegans) (ULK2), transcript variant 1, mRNA [NM_014683]	chr17:19674685-19674626	hs|17p11.2	Agilent_HUMAN_G3V2	NM_014683	chr17	19674626	19674685	-
LNCA_33_P3248108	0.0140185	4.26558	mRNA	NM_133374	NM_133374	NM_133374	114991	Hs.349208	ZNF618	zinc finger protein 618	ENST00000452710	NP1245140	GO:0005622|GO:0006355|GO:0008270|GO:0005634|GO:0003677|GO:0046872	Homo sapiens zinc finger protein 618 (ZNF618), mRNA [NM_133374]	chr9:116794935-116794994	hs|9q32	Agilent_HUMAN_G3V2	NM_133374	chr9	116794935	116794994	+
LNCA_21_P0011039	0.0492874	4.25779	mRNA	NR_033890	NR_033890	NR_033890	NA	Hs.524257	LOC338817	uncharacterized LOC338817	NA	THC2570294	NA	Homo sapiens uncharacterized LOC338817 (LOC338817), non-coding RNA [NR_033890]	chr12:11710139-11712272	hs|12p13.2	Agilent_HUMAN_G3V2	NR_033890	chr12	11710139	11712272	+
LNCA_32_P324933	0.0491033	4.24394	mRNA	NR_027047	NR_027047	NR_027047	283521	Hs.649896	LINC00282	long intergenic non-protein coding RNA 282	NA	THC2613053	NA	Homo sapiens long intergenic non-protein coding RNA 282 (LINC00282), transcript variant 1, non-coding RNA [NR_027047]	chr13:52387966-52387907	hs|13q14.3	Agilent_HUMAN_G3V2	NR_027047	chr13	52387907	52387966	-
LNCA_23_P211039	0.0353416	4.12488	mRNA	NM_006988	NM_006988	NM_006988	9510	Hs.643357	ADAMTS1	ADAM metallopeptidase with thrombospondin type 1 motif, 1	ENST00000464589	THC2498249	GO:0008285|GO:0001822|GO:0001542|GO:0005576|GO:0031410|GO:0046872|GO:0005604|GO:0060347|GO:0007229|GO:0006508|GO:0008233|GO:0008270|GO:0004222|GO:0008201|GO:0008237	Homo sapiens ADAM metallopeptidase with thrombospondin type 1 motif, 1 (ADAMTS1), mRNA [NM_006988]	chr21:28209768-28209709	hs|21q21.3	Agilent_HUMAN_G3V2	NM_006988	chr21	28209709	28209768	-
LNCA_21_P0008549	0.0463869	4.10359	mRNA	THC2683812	NA	NA	NA	NA	XLOC_011117	NA	NA	THC2683812	NA	Q8TAW2_HUMAN (Q8TAW2) CD99L2 protein, partial (13%) [THC2683812]	chr14:098429312-098429253	hs|14q32.2	Agilent_HUMAN_G3V2	THC2683812	chr14	98429253	98429312	-
LNCA_24_P310009	0.020151	4.10291	mRNA	NM_153210	NM_153210	NM_153210	124739	Hs.709621	USP43	ubiquitin specific peptidase 43	ENST00000285199	THC2481600	GO:0006511|GO:0006508|GO:0008233|GO:0008234|GO:0004221	Homo sapiens ubiquitin specific peptidase 43 (USP43), mRNA [NM_153210]	chr17:9632242-9632301	hs|17p13.1	Agilent_HUMAN_G3V2	NM_153210	chr17	9632242	9632301	+
LNCA_21_P0010646	0.0230457	4.0387	mRNA	ENST00000412204	NA	AK090412	NA	Hs.709909	XLOC_l2_001085	NA	ENST00000412204	THC2562220	NA	NA	chr1:143196580-143195893	hs|1q21.1	Agilent_HUMAN_G3V2	ENST00000412204	chr1	143195893	143196580	-
LNCA_33_P3227736	0.0480615	4.03315	mRNA	NR_027908	NR_027908	NR_027908	401253	Hs.520075	LINC00336	long intergenic non-protein coding RNA 336	ENST00000477984	THC2484695	NA	Homo sapiens long intergenic non-protein coding RNA 336 (LINC00336), non-coding RNA [NR_027908]	chr6:33553945-33553886	hs|6p21.31	Agilent_HUMAN_G3V2	NR_027908	chr6	33553886	33553945	-
LNCA_33_P3295655	0.0123382	4.02512	mRNA	NM_001163	NM_001163	NM_001163	320	Hs.171939	APBA1	amyloid beta (A4) precursor protein-binding, family A, member 1	NA	THC2612086	GO:0005515|GO:0005886|GO:0014051|GO:0005546|GO:0007268|GO:0030165|GO:0032403|GO:0006886|GO:0014047|GO:0007399|GO:0008021|GO:0043234|GO:0001540|GO:0006461|GO:0035264|GO:0007626|GO:0008088|GO:0007155	Homo sapiens amyloid beta (A4) precursor protein-binding, family A, member 1 (APBA1), mRNA [NM_001163]	chr9:72042509-72042450	hs|9q21.11	Agilent_HUMAN_G3V2	NM_001163	chr9	72042450	72042509	-
LNCA_32_P4792	0.00927128	4.0172	mRNA	ENST00000344538	XM_003403578	XM_003403578	NA	Hs.722109	NA	NA	ENST00000344538	THC2538425	NA	Novel proteinUncharacterized protein [Source:UniProtKB/TrEMBL;Acc:Q4V308] [ENST00000417488]	chr9:42427348-42427407	hs|9p12	Agilent_HUMAN_G3V2	ENST00000344538	chr9	42427348	42427407	+
LNCA_32_P800179	0.00511281	4.01442	mRNA	AK094933	NA	AK094933	NA	Hs.68846	NA	NA	NA	THC2487209	NA	Homo sapiens cDNA FLJ37614 fis, clone BRCOC2011769. [AK094933]	chr19:48685130-48685071	hs|19q13.33	Agilent_HUMAN_G3V2	AK094933	chr19	48685071	48685130	-
LNCA_33_P3371341	0.0175043	4.01148	mRNA	NR_026788	NR_026788	NR_026788	440078	Hs.512257	FAM66C	family with sequence similarity 66, member C	ENST00000544214	THC2528089	NA	Homo sapiens family with sequence similarity 66, member C (FAM66C), non-coding RNA [NR_026788]	chr12:8353321-8353380	hs|12p13.31	Agilent_HUMAN_G3V2	NR_026788	chr12	8353321	8353380	+
LNCA_33_P3451508	0.0486011	3.9951	mRNA	ENST00000446592	NA	BC070152	NA	Hs.679457	NA	NA	ENST00000446592	THC2484461	NA	Homo sapiens coiled-coil domain containing 26, mRNA (cDNA clone IMAGE:4305364). [BC070152]	chr8:130364052-130363993	hs|8q24.21	Agilent_HUMAN_G3V2	ENST00000446592	chr8	130363993	130364052	-
LNCA_24_P72178	0.00589218	3.98376	mRNA	NR_028093	NR_028093	NR_028093	80350	Hs.654503	LPAL2	lipoprotein, Lp(a)-like 2, pseudogene	ENST00000435757	THC2478296	GO:0008150|GO:0003674|GO:0005576|GO:0005575	Homo sapiens lipoprotein, Lp(a)-like 2, pseudogene (LPAL2), transcript variant 2, non-coding RNA [NR_028093]	chr6:160921823-160913946	hs|6q25.3	Agilent_HUMAN_G3V2	NR_028093	chr6	160913946	160921823	-
LNCA_24_P928052	0.00548648	3.98001	mRNA	NM_003873	NM_003873	NM_003873	8829	Hs.131704	NRP1	neuropilin 1	ENST00000374867	THC2495125	GO:0048843|GO:0050731|GO:0060301|GO:0030154|GO:0007507|GO:0002116|GO:0007413|GO:0017154|GO:0007411|GO:0043025|GO:0009887|GO:0009986|GO:0007275|GO:0016358|GO:0048485|GO:0010595|GO:0043235|GO:0019955|GO:0021636|GO:0071526|GO:0030424|GO:0035767|GO:0005886|GO:0005883|GO:0007267|GO:0046872|GO:0014911|GO:0005829|GO:0030426|GO:0019838|GO:0035729|GO:0060666|GO:0004872|GO:0005021|GO:0060627|GO:0007155|GO:…	Homo sapiens neuropilin 1 (NRP1), transcript variant 1, mRNA [NM_003873]	chr10:33466995-33466936	hs|10p11.22	Agilent_HUMAN_G3V2	NM_003873	chr10	33466936	33466995	-
LNCA_23_P120982	0.0140753	3.97583	mRNA	NM_006071	NM_006071	NM_006071	10343	Hs.241383	PKDREJ	polycystic kidney disease (polycystin) and REJ homolog (sperm receptor for egg jelly homolog, sea urchin)	ENST00000253255	THC2600927	GO:0016020|GO:0007218|GO:0005509|GO:0016021|GO:0007340|GO:0005216|GO:0006811	Homo sapiens polycystic kidney disease (polycystin) and REJ homolog (sperm receptor for egg jelly homolog, sea urchin) (PKDREJ), mRNA [NM_006071]	chr22:46651664-46651605	hs|22q13.31	Agilent_HUMAN_G3V2	NM_006071	chr22	46651605	46651664	-
LNCA_24_P135322	0.0400435	3.93858	mRNA	NM_001024629	NM_001024629	NM_001024629	8829	Hs.131704	NRP1	neuropilin 1	ENST00000374821	THC2501531	GO:0048843|GO:0050731|GO:0060301|GO:0030154|GO:0007507|GO:0002116|GO:0007413|GO:0017154|GO:0007411|GO:0043025|GO:0009887|GO:0009986|GO:0007275|GO:0016358|GO:0048485|GO:0010595|GO:0043235|GO:0019955|GO:0021636|GO:0071526|GO:0030424|GO:0035767|GO:0005886|GO:0005883|GO:0007267|GO:0046872|GO:0014911|GO:0005829|GO:0030426|GO:0019838|GO:0035729|GO:0060666|GO:0004872|GO:0005021|GO:0060627|GO:0007155|GO:…	Homo sapiens neuropilin 1 (NRP1), transcript variant 3, mRNA [NM_001024629]	chr10:33502350-33496622	hs|10p11.22	Agilent_HUMAN_G3V2	NM_001024629	chr10	33496622	33502350	-
LNCA_21_P0011680	0.0498659	3.93714	mRNA	THC2641537	NA	NA	NA	NA	XLOC_l2_006648	NA	NA	THC2641537	NA	ALU1_HUMAN (P39188) Alu subfamily J sequence contamination warning entry, partial (6%) [THC2641537]	chr19:020982692-020982751	hs|19p12	Agilent_HUMAN_G3V2	THC2641537	chr19	20982692	20982751	+
LNCA_21_P0012184	0.0154715	3.92682	mRNA	NR_027995	NR_027995	NR_027995	NA	NA	ANKRD20A9P	ankyrin repeat domain 20 family, member A9, pseudogene	NA	NA	NA	Homo sapiens ankyrin repeat domain 20 family, member A9, pseudogene (ANKRD20A9P), non-coding RNA [NR_027995]	chr13:19444837-19444778	hs|13q11	Agilent_HUMAN_G3V2	NR_027995	chr13	19444778	19444837	-
LNCA_33_P3424364	0.0467162	3.92502	mRNA	NM_001134848	NM_001134848	NM_001134848	100129792	Hs.275775	CCDC152	coiled-coil domain containing 152	ENST00000361970	THC2491589	NA	Homo sapiens coiled-coil domain containing 152 (CCDC152), mRNA [NM_001134848]	chr5:42801648-42801707	hs|5p12	Agilent_HUMAN_G3V2	NM_001134848	chr5	42801648	42801707	+
LNCA_33_P3373765	0.0209107	3.91601	mRNA	NM_000797	NM_000797	NM_000797	1815	Hs.99922	DRD4	dopamine receptor D4	ENST00000176183	NP087834	GO:0005515|GO:0030424|GO:0008344|GO:0017124|GO:0032417|GO:0051927|GO:0005886|GO:0030818|GO:0048148|GO:0015459|GO:0007195|GO:0007194|GO:0042053|GO:0042596|GO:0000187|GO:0005737|GO:0042417|GO:0043197|GO:0051586|GO:0043195|GO:0008144|GO:0001963|GO:0043025|GO:0004872|GO:0001662|GO:0004871|GO:0005938|GO:0050482|GO:0050848|GO:0012506|GO:0033674|GO:0008355|GO:0004930|GO:0007614|GO:0004952|GO:0006874|GO:…	Homo sapiens dopamine receptor D4 (DRD4), mRNA [NM_000797]	chr11:640644-640703	hs|11p15.5	Agilent_HUMAN_G3V2	NM_000797	chr11	640644	640703	+
LNCA_23_P33914	0.0230864	3.87376	mRNA	NM_017681	NM_017681	NM_017681	54830	Hs.163629	NUP62CL	nucleoporin 62kDa C-terminal like	ENST00000484614	THC2478003	GO:0005643|GO:0017056|GO:0015031	Homo sapiens nucleoporin 62kDa C-terminal like (NUP62CL), transcript variant 1, mRNA [NM_017681]	chrX:106367003-106366944	hs|Xq22.3	Agilent_HUMAN_G3V2	NM_017681	chrX	106366944	106367003	-
LNCA_33_P3266639	0.0496415	3.86308	mRNA	NM_001004313	NM_001004313	NM_001004313	388335	Hs.462230	TMEM220	transmembrane protein 220	ENST00000341871	THC2473761	GO:0016020|GO:0016021	Homo sapiens transmembrane protein 220 (TMEM220), mRNA [NM_001004313]	chr17:10616718-10616659	hs|17p13.1	Agilent_HUMAN_G3V2	NM_001004313	chr17	10616659	10616718	-
LNCA_23_P122508	0.0479206	3.84754	mRNA	NM_080870	NM_080870	NM_080870	135656	Hs.631993	DPCR1	diffuse panbronchiolitis critical region 1	ENST00000414703	THC2476724	GO:0016020|GO:0016021	Homo sapiens diffuse panbronchiolitis critical region 1 (DPCR1), mRNA [NM_080870]	chr6:30921282-30921341	hs|6p21.33	Agilent_HUMAN_G3V2	NM_080870	chr6	30921282	30921341	+
LNCA_21_P0012224	0.0429968	3.84006	mRNA	ENST00000449602	XM_003403484	XM_003403484	NA	NA	XLOC_l2_009140	NA	ENST00000449602	THC2646287	NA	PREDICTED: Homo sapiens hypothetical protein LOC100652984 (LOC100652984), mRNA [XM_003403484]	chr21:16742931-16742872	hs|21q21.1	Agilent_HUMAN_G3V2	ENST00000449602	chr21	16742872	16742931	-
LNCA_23_P421811	0.00617434	3.83058	mRNA	NM_152503	NM_152503	NM_152503	140699	Hs.349125	C20orf132	chromosome 20 open reading frame 132	ENST00000400441	THC2657960	NA	Homo sapiens chromosome 20 open reading frame 132 (C20orf132), transcript variant 1, mRNA [NM_152503]	chr20:35729704-35729645	hs|20q11.23	Agilent_HUMAN_G3V2	NM_152503	chr20	35729645	35729704	-
LNCA_23_P414713	0.0332739	3.82513	mRNA	NM_032423	NM_032423	NM_032423	84436	Hs.662043	ZNF528	zinc finger protein 528	ENST00000360465	THC2475449	GO:0005622|GO:0006355|GO:0008270|GO:0005634|GO:0003677|GO:0046872	Homo sapiens zinc finger protein 528 (ZNF528), mRNA [NM_032423]	chr19:52921177-52921236	hs|19q13.41	Agilent_HUMAN_G3V2	NM_032423	chr19	52921177	52921236	+
LNCA_33_P3242623	0.0149379	3.82382	mRNA	NM_014331	NM_014331	NM_014331	23657	Hs.390594	SLC7A11	solute carrier family 7 (anionic amino acid transporter light chain, xc- system), member 11	ENST00000280612	THC2472999	GO:0005515|GO:0005791|GO:0005792|GO:0015327|GO:0070306|GO:0005886|GO:0006865|GO:0009636|GO:0050900|GO:0055085|GO:0034641|GO:0015171|GO:0007420|GO:0007596|GO:0016021|GO:0005856|GO:0006979|GO:0035094|GO:0006811	Homo sapiens solute carrier family 7 (anionic amino acid transporter light chain, xc- system), member 11 (SLC7A11), mRNA [NM_014331]	chr4:139085492-139085433	hs|4q28.3	Agilent_HUMAN_G3V2	NM_014331	chr4	139085433	139085492	-
LNCA_33_P3812038	0.0284989	3.82055	mRNA	AK074459	NA	AK074459	340335	Hs.681796	LOC340335	uncharacterized LOC340335	NA	THC2499017	NA	Homo sapiens cDNA FLJ23879 fis, clone LNG13743. [AK074459]	chr7:102168451-102168392	hs|7q22.1	Agilent_HUMAN_G3V2	AK074459	chr7	102168392	102168451	-
LNCA_23_P360754	0.0375717	3.768	mRNA	NM_005099	NM_005099	NM_005099	9507	Hs.211604	ADAMTS4	ADAM metallopeptidase with thrombospondin type 1 motif, 4	ENST00000367996	THC2471245	GO:0005515|GO:0001501|GO:0006508|GO:0005578|GO:0008270|GO:0008233|GO:0005576|GO:0004222|GO:0002020|GO:0005615|GO:0046872|GO:0008237	Homo sapiens ADAM metallopeptidase with thrombospondin type 1 motif, 4 (ADAMTS4), mRNA [NM_005099]	chr1:161159705-161159646	hs|1q23.3	Agilent_HUMAN_G3V2	NM_005099	chr1	161159646	161159705	-
LNCA_33_P3293511	0.00604427	3.75736	mRNA	NM_001039374	NM_001039374	NM_001039374	84960	Hs.728796	KIAA1984	KIAA1984	ENST00000496839	THC2580629	NA	Homo sapiens KIAA1984 (KIAA1984), mRNA [NM_001039374]	chr9:139701458-139701517	hs|9q34.3	Agilent_HUMAN_G3V2	NM_001039374	chr9	139701458	139701517	+
LNCA_33_P3252475	0.041346	3.71318	mRNA	NR_015430	NR_015430	NR_015430	388011	Hs.651477	C14orf64	chromosome 14 open reading frame 64	ENST00000499006	THC2500420	NA	Homo sapiens chromosome 14 open reading frame 64 (C14orf64), non-coding RNA [NR_015430]	chr14:98392342-98392283	hs|14q32.2	Agilent_HUMAN_G3V2	NR_015430	chr14	98392283	98392342	-
LNCA_33_P3231319	0.0020461	3.68417	mRNA	NA	NA	NA	NA	NA	NA	NA	NA	NA	NA	NA	chr6:160921697-160921638	hs|6q25.3	Agilent_HUMAN_G3V2	NA	chr6	160921638	160921697	-
LNCA_33_P3416347	0.0157582	3.67425	mRNA	ENST00000390396	NA	M27390	NA	Hs.382212	NA	NA	ENST00000390396	NP321589	NA	T cell receptor beta variable 23-1 (non-functional) [Source:HGNC Symbol;Acc:12201] [ENST00000390396]	chr7:142353832-142353891	hs|7q34	Agilent_HUMAN_G3V2	ENST00000390396	chr7	142353832	142353891	+
LNCA_33_P3367316	0.0381614	3.65441	mRNA	NR_004859	NR_004859	NR_004859	54581	NA	SCAND2	SCAN domain containing 2 pseudogene	ENST00000348993	THC2538549	GO:0008150|GO:0003674|GO:0003700|GO:0016032|GO:0005634|GO:0005575	Homo sapiens SCAN domain containing 2 pseudogene (SCAND2), transcript variant 1, non-coding RNA [NR_004859]	chr15:85185635-85185694	hs|15q25.2	Agilent_HUMAN_G3V2	NR_004859	chr15	85185635	85185694	+
LNCA_23_P157926	0.0315929	3.63873	mRNA	NM_152570	NM_152570	NM_152570	158038	Hs.650389	LINGO2	leucine rich repeat and Ig domain containing 2	ENST00000308675	THC2480578	GO:0016020|GO:0016021	Homo sapiens leucine rich repeat and Ig domain containing 2 (LINGO2), mRNA [NM_152570]	chr9:27948668-27948609	hs|9p21.2	Agilent_HUMAN_G3V2	NM_152570	chr9	27948609	27948668	-
LNCA_33_P3237005	0.0112257	3.62541	mRNA	NR_002438	NR_002438	NR_002438	594840	Hs.626298	ZFAT-AS1	ZFAT antisense RNA 1 (non-protein coding)	ENST00000505776	NA	NA	Homo sapiens ZFAT antisense RNA 1 (non-protein coding) (ZFAT-AS1), antisense RNA [NR_002438]	chr8:135612860-135612919	hs|8q24.22	Agilent_HUMAN_G3V2	NR_002438	chr8	135612860	135612919	+
LNCA_33_P3347241	0.0375988	3.62492	mRNA	ENST00000420598	XR_110942	XR_110942	NA	Hs.446446	NA	NA	ENST00000420598	THC2562220	NA	NA	chr1:143194234-143194175	hs|1q21.1	Agilent_HUMAN_G3V2	ENST00000420598	chr1	143194175	143194234	-
LNCA_33_P3387971	0.0399889	3.54431	mRNA	AK124342	NA	AK124342	400999	Hs.585221	FLJ42351	uncharacterized LOC400999	NA	THC2495521	NA	Homo sapiens cDNA FLJ42351 fis, clone UTERU2005664. [AK124342]	chr2:113402254-113402195	hs|2q13	Agilent_HUMAN_G3V2	AK124342	chr2	113402195	113402254	-
LNCA_33_P3362359	0.012631	3.53193	mRNA	ENST00000390389	NA	NA	NA	NA	NA	NA	ENST00000390389	THC2528206	NA	T cell receptor beta variable 23/OR9-2 (non-functional) [Source:HGNC Symbol;Acc:12202] [ENST00000390389]	chr9:33638377-33638436	hs|9p13.3	Agilent_HUMAN_G3V2	ENST00000390389	chr9	33638377	33638436	+
LNCA_21_P0013925	0.0165991	3.52777	mRNA	NR_027002	NR_027002	NR_027002	NA	Hs.271249	LOC388692	uncharacterized LOC388692	NA	THC2500760	NA	Homo sapiens uncharacterized LOC388692 (LOC388692), non-coding RNA [NR_027002]	chr1:149286635-149286694	hs|1q21.2	Agilent_HUMAN_G3V2	NR_027002	chr1	149286635	149286694	+
LNCA_33_P3390017	0.0348403	3.52157	mRNA	NM_207445	NM_207445	NM_207445	400360	Hs.376109	C15orf54	chromosome 15 open reading frame 54	ENST00000318578	THC2481329	NA	Homo sapiens chromosome 15 open reading frame 54 (C15orf54), mRNA [NM_207445]	chr15:39546941-39547000	hs|15q14	Agilent_HUMAN_G3V2	NM_207445	chr15	39546941	39547000	+
LNCA_24_P924836	0.00435862	3.51603	mRNA	BC022827	NA	BC022827	9946	Hs.352671	CRYZL1	crystallin, zeta (quinone reductase)-like 1	ENST00000399442	NA	GO:0050661|GO:0016491|GO:0008270|GO:0003960|GO:0042375|GO:0005829	Homo sapiens crystallin, zeta (quinone reductase)-like 1, mRNA (cDNA clone IMAGE:3632782), partial cds. [BC022827]	chr21:35013522-35012473	hs|21q22.11	Agilent_HUMAN_G3V2	BC022827	chr21	35012473	35013522	-
LNCA_32_P12994	0.0145698	3.51067	mRNA	NR_034128	NR_034128	NR_034128	440900	NA	LOC440900	uncharacterized LOC440900	ENST00000412690	THC2577212	NA	Homo sapiens uncharacterized LOC440900 (LOC440900), non-coding RNA [NR_034128]	chr2:114764618-114764677	hs|2q14.1	Agilent_HUMAN_G3V2	NR_034128	chr2	114764618	114764677	+
LNCA_33_P3634554	0.00149022	3.50822	mRNA	CR616125	NA	CR616125	284108	Hs.568007	LOC284108	uncharacterized LOC284108	NA	THC2601422	NA	full-length cDNA clone CS0DB003YF07 of Neuroblastoma Cot 10-normalized of Homo sapiens (human) [CR616125]	chr17:37324024-37324083	hs|17q12	Agilent_HUMAN_G3V2	CR616125	chr17	37324024	37324083	+
LNCA_21_P0013116	0.000547177	3.50746	mRNA	NR_028093	NR_028093	NR_028093	NA	Hs.654503	LPAL2	lipoprotein, Lp(a)-like 2, pseudogene	ENST00000435757	THC2478296	GO:0008150|GO:0003674|GO:0005576|GO:0005575	Homo sapiens lipoprotein, Lp(a)-like 2, pseudogene (LPAL2), transcript variant 2, non-coding RNA [NR_028093]	chr6:160906987-160906928	hs|6q25.3	Agilent_HUMAN_G3V2	NR_028093	chr6	160906928	160906987	-
LNCA_33_P3315719	0.0454062	3.5031	mRNA	NM_172069	NM_172069	NM_172069	130271	Hs.164162	PLEKHH2	pleckstrin homology domain containing, family H (with MyTH4 domain) member 2	ENST00000405000	THC2513200	GO:0005737|GO:0016020|GO:0005488|GO:0016021|GO:0005856	Homo sapiens pleckstrin homology domain containing, family H (with MyTH4 domain) member 2 (PLEKHH2), mRNA [NM_172069]	chr2:43992834-43992893	hs|2p21	Agilent_HUMAN_G3V2	NM_172069	chr2	43992834	43992893	+
LNCA_32_P92281	0.018331	3.49911	mRNA	NR_028058	NR_028058	NR_028058	100132832	Hs.729714	LOC100132832	PMS2 postmeiotic segregation increased 2 (S. cerevisiae) pseudogene	ENST00000447643	THC2507172	NA	Homo sapiens PMS2 postmeiotic segregation increased 2 (S. cerevisiae) pseudogene (LOC100132832), non-coding RNA [NR_028058]	chr7:76682142-76682201	hs|7q11.23	Agilent_HUMAN_G3V2	NR_028058	chr7	76682142	76682201	+
LNCA_24_P178396	0.0072384	3.48835	mRNA	NM_001031618	NM_001031618	NM_001031618	441273	Hs.656428	SPDYE2	speedy homolog E2 (Xenopus laevis)	ENST00000432940	THC2555415	NA	Homo sapiens speedy homolog E2 (Xenopus laevis) (SPDYE2), mRNA [NM_001031618]	chr7:102201047-102201106	hs|7q22.1	Agilent_HUMAN_G3V2	NM_001031618	chr7	102201047	102201106	+
LNCA_33_P3377888	0.0129752	3.48336	mRNA	AK123255	NA	AK123255	NA	Hs.503891	NA	NA	NA	THC2488183	NA	Homo sapiens cDNA FLJ41261 fis, clone BRAMY2034920. [AK123255]	chr11:113690256-113690197	hs|11q23.2	Agilent_HUMAN_G3V2	AK123255	chr11	113690197	113690256	-
LNCA_24_P137434	0.0220844	3.44934	mRNA	NM_080927	NM_080927	NM_080927	131566	Hs.203691	DCBLD2	discoidin, CUB and LCCL domain containing 2	ENST00000404023	THC2689915	GO:0030308|GO:0016020|GO:0009986|GO:0005887|GO:0042060|GO:0007155|GO:0030522	Homo sapiens discoidin, CUB and LCCL domain containing 2 (DCBLD2), mRNA [NM_080927]	chr3:98515261-98515202	hs|3q12.1	Agilent_HUMAN_G3V2	NM_080927	chr3	98515202	98515261	-
LNCA_23_P147786	0.0277447	3.43371	mRNA	NM_014677	NM_014677	NM_014677	9699	Hs.655271	RIMS2	regulating synaptic membrane exocytosis 2	ENST00000402998	THC2621397	GO:0005515|GO:0042734|GO:0017137|GO:0030054|GO:0005886|GO:0045202|GO:0006886|GO:0046872	Homo sapiens regulating synaptic membrane exocytosis 2 (RIMS2), transcript variant 2, mRNA [NM_014677]	chr8:105263899-105263958	hs|8q22.3	Agilent_HUMAN_G3V2	NM_014677	chr8	105263899	105263958	+
LNCA_33_P3282359	0.0209932	3.42118	mRNA	NR_027995	NR_027995	NR_027995	284232	Hs.632352	ANKRD20A9P	ankyrin repeat domain 20 family, member A9, pseudogene	NA	THC2492546	NA	Homo sapiens ankyrin repeat domain 20 family, member A9, pseudogene (ANKRD20A9P), non-coding RNA [NR_027995]	chr13:19446042-19445983	hs|13q11	Agilent_HUMAN_G3V2	NR_027995	chr13	19445983	19446042	-
LNCA_33_P3288189	0.0483086	3.41887	mRNA	NM_014899	NM_014899	NM_014899	22836	Hs.445030	RHOBTB3	Rho-related BTB domain containing 3	ENST00000379982	THC2550943	GO:0005515|GO:0017137|GO:0005794|GO:0016787|GO:0006200|GO:0000166|GO:0007264|GO:0006810|GO:0042147|GO:0005525|GO:0016887|GO:0005524	Homo sapiens Rho-related BTB domain containing 3 (RHOBTB3), mRNA [NM_014899]	chr5:95131797-95131856	hs|5q15	Agilent_HUMAN_G3V2	NM_014899	chr5	95131797	95131856	+
LNCA_33_P3399045	0.0229674	3.41032	mRNA	BC032569	NA	BC032569	NA	NA	NA	NA	NA	THC2484170	NA	Homo sapiens cDNA clone IMAGE:5242641. [BC032569]	chr19:58204102-58204043	hs|19q13.43	Agilent_HUMAN_G3V2	BC032569	chr19	58204043	58204102	-
LNCA_21_P0012091	0.0207554	3.39766	mRNA	ENST00000438056	XR_109892	XR_109892	NA	Hs.131740	XLOC_l2_008261	NA	ENST00000438056	THC2558414	NA	NA	chr2:131176793-131176734	hs|2q21.1	Agilent_HUMAN_G3V2	ENST00000438056	chr2	131176734	131176793	-
LNCA_21_P0000835	0.028601	3.37658	mRNA	NR_038910	NR_038910	NR_038910	NA	NA	LOC100129845	uncharacterized LOC100129845	NA	NA	NA	Homo sapiens uncharacterized LOC100129845 (LOC100129845), non-coding RNA [NR_038910]	NA	NA	Agilent_HUMAN_G3V2	NR_038910	NA	NA	NA	+
LNCA_21_P0010769	0.0297744	3.35381	mRNA	NR_003366	NR_003366	NR_003366	NA	Hs.730425	ANKRD20A8P	ankyrin repeat domain 20 family, member A8, pseudogene	ENST00000412204	THC2528940	NA	Homo sapiens ankyrin repeat domain 20 family, member A8, pseudogene (ANKRD20A8P), non-coding RNA [NR_003366]	chr2:95461681-95461622	hs|2q11.1	Agilent_HUMAN_G3V2	NR_003366	chr2	95461622	95461681	-
LNCA_33_P3247372	0.0479059	3.3448	mRNA	AK124064	NA	AK124064	400927	Hs.720223	LOC400927	TPTE and PTEN homologous inositol lipid phosphatase pseudogene	NA	THC2489664	NA	Homo sapiens cDNA FLJ42070 fis, clone SYNOV2012326. [AK124064]	chr22:38755483-38755424	hs|22q13.1	Agilent_HUMAN_G3V2	AK124064	chr22	38755424	38755483	-
LNCA_23_P81441	0.0255682	3.33326	mRNA	NM_130848	NM_130848	NM_130848	140947	Hs.152477	C5orf20	chromosome 5 open reading frame 20	ENST00000537858	THC2480949	GO:0005634	Homo sapiens chromosome 5 open reading frame 20 (C5orf20), mRNA [NM_130848]	chr5:134780033-134779974	hs|5q31.1	Agilent_HUMAN_G3V2	NM_130848	chr5	134779974	134780033	-
LNCA_33_P3371819	0.0388925	3.33099	mRNA	NM_024754	NM_024754	NM_024754	79810	Hs.126906	PTCD2	pentatricopeptide repeat domain 2	NA	THC2678868	GO:0048747|GO:0007507|GO:0005739|GO:0001889|GO:0055010|GO:0001822|GO:0007005|GO:0050684	Homo sapiens pentatricopeptide repeat domain 2 (PTCD2), mRNA [NM_024754]	chr5:71655118-71655177	hs|5q13.2	Agilent_HUMAN_G3V2	NM_024754	chr5	71655118	71655177	+
LNCA_23_P42931	0.0371794	3.31879	mRNA	NM_001080511	NM_001080511	NM_001080511	154790	Hs.57806	CLEC2L	C-type lectin domain family 2, member L	ENST00000520413	THC2734575	GO:0016020|GO:0005488|GO:0005529|GO:0016021	Homo sapiens C-type lectin domain family 2, member L (CLEC2L), mRNA [NM_001080511]	chr7:139225205-139226797	hs|7q34	Agilent_HUMAN_G3V2	NM_001080511	chr7	139225205	139226797	+
LNCA_32_P846696	0.0221449	3.3173	mRNA	NR_027000	NR_027000	NR_027000	349196	Hs.559040	LOC349196	uncharacterized LOC349196	NA	THC2499319	NA	Homo sapiens uncharacterized LOC349196 (LOC349196), non-coding RNA [NR_027000]	chr8:7577689-7577630	hs|8p23.1	Agilent_HUMAN_G3V2	NR_027000	chr8	7577630	7577689	-
LNCA_32_P384562	0.0401906	3.29336	mRNA	NR_023386	NR_023386	NR_023386	114819	Hs.597881	CROCCP3	ciliary rootlet coiled-coil, rootletin pseudogene 3	NA	THC2515694	NA	Homo sapiens ciliary rootlet coiled-coil, rootletin pseudogene 3 (CROCCP3), non-coding RNA [NR_023386]	chr1:16794256-16794197	hs|1p36.13	Agilent_HUMAN_G3V2	NR_023386	chr1	16794197	16794256	-
LNCA_21_P0012912	0.0445705	3.29208	mRNA	NM_001164443	NM_001164443	NM_001164443	NA	Hs.482533	ANKRD31	ankyrin repeat domain 31	ENST00000274361	NA	NA	Homo sapiens ankyrin repeat domain 31 (ANKRD31), mRNA [NM_001164443]	chr5:74376451-74364489	hs|5q13.3	Agilent_HUMAN_G3V2	NM_001164443	chr5	74364489	74376451	-
LNCA_33_P3259092	0.0109695	3.2612	mRNA	NM_001079802	NM_001079802	NM_001079802	2218	Hs.55777	FKTN	fukutin	ENST00000457847	THC2634420	GO:0005801|GO:0005794|GO:0008285|GO:0005783|GO:0005634|GO:0060049|GO:0005615|GO:0007399|GO:0007517|GO:0046329|GO:0000139|GO:0016020|GO:0016021|GO:0016740	Homo sapiens fukutin (FKTN), transcript variant 1, mRNA [NM_001079802]	chr9:108399016-108399075	hs|9q31.2	Agilent_HUMAN_G3V2	NM_001079802	chr9	108399016	108399075	+
LNCA_19_P00801823	0.000612092	3.25404	mRNA	AV659465	NA	AV659465	NA	Hs.587446	NA	NA	NA	NA	NA	AV659465 GLC Homo sapiens cDNA clone GLCFXD07 3', mRNA sequence [AV659465]	chr8:126929282-126929223	hs|8q24.13	Agilent_HUMAN_G3V2	AV659465	chr8	126929223	126929282	-
LNCA_23_P201939	0.0345227	3.25038	mRNA	NM_005167	NM_005167	NM_005167	333926	Hs.655231	PPM1J	protein phosphatase, Mg2+/Mn2+ dependent, 1J	ENST00000359994	NP1134207	GO:0006470|GO:0016787|GO:0004722	Homo sapiens protein phosphatase, Mg2+/Mn2+ dependent, 1J (PPM1J), mRNA [NM_005167]	chr1:113253152-113253093	hs|1p13.2	Agilent_HUMAN_G3V2	NM_005167	chr1	113253093	113253152	-
LNCA_21_P0009110	0.0296813	3.24661	mRNA	THC2535612	NA	NA	NA	NA	XLOC_011765	NA	NA	THC2535612	NA	ZFP90_HUMAN (Q8TF47) Zinc finger protein 90 homolog (Zfp-90), partial (13%) [THC2535612]	chr16:068609716-068609775	hs|16q22.1	Agilent_HUMAN_G3V2	THC2535612	chr16	68609716	68609775	+
LNCA_32_P84369	0.00819336	3.24465	mRNA	NM_001079529	NM_001079529	NM_001079529	202134	Hs.646912	FAM153B	family with sequence similarity 153, member B	ENST00000502475	THC2544129	NA	Homo sapiens family with sequence similarity 153, member B (FAM153B), mRNA [NM_001079529]	chr5:175542646-175542705	hs|5q35.2	Agilent_HUMAN_G3V2	NM_001079529	chr5	175542646	175542705	+
LNCA_23_P52121	0.0330408	3.23789	mRNA	NM_002614	NM_002614	NM_002614	5174	Hs.444751	PDZK1	PDZ domain containing 1	ENST00000451928	THC2624486	GO:0005515|GO:0005215|GO:0005737|GO:0016020|GO:0008283|GO:0006810|GO:0031526|GO:0034767|GO:0030165|GO:0015893|GO:0015879|GO:0005124	Homo sapiens PDZ domain containing 1 (PDZK1), transcript variant 1, mRNA [NM_002614]	chr1:145763717-145763776	hs|1q21.1	Agilent_HUMAN_G3V2	NM_002614	chr1	145763717	145763776	+
LNCA_21_P0006585	0.0159921	3.22291	mRNA	NR_033380	NR_033380	NR_033380	NA	Hs.444541	CD99P1	CD99 molecule pseudogene 1	ENST00000435581	THC2518435	NA	Homo sapiens CD99 molecule pseudogene 1 (CD99P1), transcript variant 1, non-coding RNA [NR_033380]	chrY:2525150-2525209	hs|Yp11.31	Agilent_HUMAN_G3V2	NR_033380	chrY	2525150	2525209	+
LNCA_33_P3408624	0.0195936	3.20358	mRNA	NM_015232	NM_015232	NM_015232	440073	Hs.536319	IQSEC3	IQ motif and Sec7 domain 3	ENST00000382841	THC2621621	GO:0005622|GO:0005086|GO:0005737|GO:0005730|GO:0032012|GO:0005634	Homo sapiens IQ motif and Sec7 domain 3 (IQSEC3), transcript variant 2, mRNA [NM_015232]	chr12:280435-280494	hs|12p13.33	Agilent_HUMAN_G3V2	NM_015232	chr12	280435	280494	+
LNCA_32_P84373	0.016708	3.19675	mRNA	NM_173663	NM_173663	NM_173663	285596	Hs.652754	FAM153A	family with sequence similarity 153, member A	ENST00000502475	NP1472793	NA	Homo sapiens family with sequence similarity 153, member A (FAM153A), mRNA [NM_173663]	chr5:177151163-177151104	hs|5q35.3	Agilent_HUMAN_G3V2	NM_173663	chr5	177151104	177151163	-
LNCA_33_P3311917	0.0172656	3.16543	mRNA	THC2537043	NA	NA	NA	NA	NA	NA	NA	THC2537043	NA	Q6JHZ7_HUMAN (Q6JHZ7) HCV-NS5ATP5 binding protein 1, partial (29%) [THC2537043]	chr8:007180352-007180293	hs|8p23.1	Agilent_HUMAN_G3V2	THC2537043	chr8	7180293	7180352	-
LNCA_19_P00317775	0.0416665	3.14874	mRNA	NR_023915	NR_023915	NR_023915	NA	NA	IPW	imprinted in Prader-Willi syndrome (non-protein coding)	ENST00000549804	THC2494510	NA	Homo sapiens imprinted in Prader-Willi syndrome (non-protein coding) (IPW), non-coding RNA [NR_023915]	chr15:25367338-25367397	hs|15q11.2	Agilent_HUMAN_G3V2	NR_023915	chr15	25367338	25367397	+
LNCA_33_P3384617	0.0259305	3.14566	mRNA	BX114012	NA	BX114012	NA	Hs.558816	NA	NA	NA	THC2493596	NA	BX114012 Soares_testis_NHT Homo sapiens cDNA clone IMAGp998G154108, mRNA sequence [BX114012]	chr18:14255484-14255543	hs|18p11.21	Agilent_HUMAN_G3V2	BX114012	chr18	14255484	14255543	+
LNCA_21_P0012089	0.021618	3.14433	mRNA	NR_026758	NR_026758	NR_026758	NA	Hs.469918	LOC440905	uncharacterized LOC440905	ENST00000449170	THC2536310	NA	Homo sapiens uncharacterized LOC440905 (LOC440905), non-coding RNA [NR_026758]	chr2:130783653-130783594	hs|2q21.1	Agilent_HUMAN_G3V2	NR_026758	chr2	130783594	130783653	-
LNCA_24_P84401	0.0135086	3.1383	mRNA	NA	NA	NA	NA	NA	NA	NA	NA	NA	NA	NA	chr11:093343294-093343235	hs|11q21	Agilent_HUMAN_G3V2	NA	chr11	93343235	93343294	-
LNCA_21_P0000183	0.0439614	3.12872	mRNA	NR_040434	NR_040434	NR_040434	NA	Hs.121613	LOC100505676	uncharacterized LOC100505676	NA	THC2657518	NA	Homo sapiens uncharacterized LOC100505676 (LOC100505676), non-coding RNA [NR_040434]	chr8:67332026-67331967	hs|8q13.1	Agilent_HUMAN_G3V2	NR_040434	chr8	67331967	67332026	-
LNCA_33_P3236993	0.0414084	3.12371	mRNA	NM_001670	NM_001670	NM_001670	421	Hs.713616	ARVCF	armadillo repeat gene deleted in velocardiofacial syndrome	ENST00000406259	THC2477703	GO:0005622|GO:0005515|GO:0005737|GO:0005886|GO:0007275|GO:0005634|GO:0007155	Homo sapiens armadillo repeat gene deleted in velocardiofacial syndrome (ARVCF), mRNA [NM_001670]	chr22:19960516-19960457	hs|22q11.21	Agilent_HUMAN_G3V2	NM_001670	chr22	19960457	19960516	-
LNCA_21_P0010650	0.00443397	3.11533	mRNA	ENST00000422716	NA	NA	NA	NA	XLOC_l2_001089	NA	ENST00000422716	THC2716686	NA	Q5VUR7_HUMAN (Q5VUR7) Ankyrin repeat domain 20A, partial (14%) [THC2716686]	chr1:143231163-143230401	hs|1q21.1	Agilent_HUMAN_G3V2	ENST00000422716	chr1	143230401	143231163	-
LNCA_32_P115438	0.044585	3.11186	mRNA	NR_027276	NR_027276	NR_027276	100128239	Hs.423734	LOC100128239	uncharacterized LOC100128239	NA	THC2499518	NA	Homo sapiens uncharacterized LOC100128239 (LOC100128239), non-coding RNA [NR_027276]	chr11:133910936-133910995	hs|11q25	Agilent_HUMAN_G3V2	NR_027276	chr11	133910936	133910995	+
LNCA_21_P0000884	0.0368667	3.11098	mRNA	NR_040023	NR_040023	NR_040023	NA	Hs.406976	ERVK13-1	endogenous retrovirus group K13, member 1	NA	THC2657570	GO:0005886|GO:0005198|GO:0019031|GO:0016021|GO:0019012	Homo sapiens endogenous retrovirus group K13, member 1 (ERVK13-1), non-coding RNA [NR_040023]	chr16:2708449-2708390	hs|16p13.3	Agilent_HUMAN_G3V2	NR_040023	chr16	2708390	2708449	-
LNCA_33_P3365701	0.0261309	3.08578	mRNA	THC2547729	NA	NA	NA	NA	NA	NA	NA	THC2547729	NA	Q7SFQ1_NEUCR (Q7SFQ1) Predicted protein, partial (13%) [THC2547729]	chr15:063836532-063836473	hs|15q22.31	Agilent_HUMAN_G3V2	THC2547729	chr15	63836473	63836532	-
LNCA_24_P262321	0.0093996	3.07129	mRNA	NM_001204478	NM_001204478	NM_001204478	100533496	Hs.164595	FAM18B2-CDRT4	FAM18B2-CDRT4 readthrough	ENST00000519970	THC2629764	NA	Homo sapiens FAM18B2-CDRT4 readthrough (FAM18B2-CDRT4), transcript variant 1, mRNA [NM_001204478]	chr17:15341444-15341385	hs|17p12	Agilent_HUMAN_G3V2	NM_001204478	chr17	15341385	15341444	-
LNCA_24_P508103	0.0050087	3.05934	mRNA	NR_026758	NR_026758	NR_026758	440905	Hs.131740	LOC440905	uncharacterized LOC440905	ENST00000456785	THC2536202	NA	Homo sapiens uncharacterized LOC440905 (LOC440905), non-coding RNA [NR_026758]	chr2:130783918-130783859	hs|2q21.1	Agilent_HUMAN_G3V2	NR_026758	chr2	130783859	130783918	-
LNCA_23_P88222	0.0460088	3.05606	mRNA	NM_138790	NM_138790	NM_138790	122618	Hs.407101	PLD4	phospholipase D family, member 4	ENST00000392593	THC2473970	GO:0016042|GO:0016787|GO:0016020|GO:0070290|GO:0004630|GO:0016021	Homo sapiens phospholipase D family, member 4 (PLD4), mRNA [NM_138790]	chr14:105398513-105398653	hs|14q32.33	Agilent_HUMAN_G3V2	NM_138790	chr14	105398513	105398653	+
LNCA_24_P917759	0.0040623	3.05378	mRNA	NA	NA	NA	NA	NA	NA	NA	NA	NA	NA	NA	chr16:020755117-020755058	hs|16p12.3	Agilent_HUMAN_G3V2	NA	chr16	20755058	20755117	-
LNCA_33_P3363500	0.0459149	3.05105	mRNA	THC2723408	NA	NA	NA	NA	NA	NA	NA	THC2723408	NA	NA	chr22:022645324-022645265	hs|22q11.22	Agilent_HUMAN_G3V2	THC2723408	chr22	22645265	22645324	-
LNCA_21_P0013165	0.0238363	3.04846	mRNA	NR_028092	NR_028092	NR_028092	NA	Hs.654503	LPAL2	lipoprotein, Lp(a)-like 2, pseudogene	ENST00000335388	THC2489172	GO:0008150|GO:0003674|GO:0005576|GO:0005575	Homo sapiens lipoprotein, Lp(a)-like 2, pseudogene (LPAL2), transcript variant 1, non-coding RNA [NR_028092]	chr6:160888288-160888229	hs|6q25.3	Agilent_HUMAN_G3V2	NR_028092	chr6	160888229	160888288	-
LNCA_23_P422212	0.0284353	3.04828	mRNA	NM_173508	NM_173508	NM_173508	148641	Hs.158748	SLC35F3	solute carrier family 35, member F3	ENST00000366617	THC2486904	GO:0016020|GO:0006810|GO:0016021	Homo sapiens solute carrier family 35, member F3 (SLC35F3), mRNA [NM_173508]	chr1:234460130-234460189	hs|1q42.2	Agilent_HUMAN_G3V2	NM_173508	chr1	234460130	234460189	+
LNCA_33_P3357332	0.0282053	3.04052	mRNA	ENST00000460965	XR_108968	XR_108968	NA	Hs.662552	NA	NA	ENST00000460965	THC2649125	NA	chromosome 9 open reading frame 147 [Source:HGNC Symbol;Acc:31438] [ENST00000460965]	chr9:115246889-115246830	hs|9q32	Agilent_HUMAN_G3V2	ENST00000460965	chr9	115246830	115246889	-
LNCA_32_P100683	0.0227307	3.04032	mRNA	NM_001145418	NM_001145418	NM_001145418	23331	Hs.387856	TTC28	tetratricopeptide repeat domain 28	ENST00000397906	THC2536778	GO:0005488	Homo sapiens tetratricopeptide repeat domain 28 (TTC28), mRNA [NM_001145418]	chr22:28374426-28374367	hs|22q12.1	Agilent_HUMAN_G3V2	NM_001145418	chr22	28374367	28374426	-
LNCA_23_P204801	0.0216886	3.0372	mRNA	NM_032148	NM_032148	NM_032148	84102	Hs.577463	SLC41A2	solute carrier family 41, member 2	ENST00000549713	THC2476143	GO:0005886|GO:0008324|GO:0016021|GO:0055085	Homo sapiens solute carrier family 41, member 2 (SLC41A2), mRNA [NM_032148]	chr12:105198910-105198851	hs|12q23.3	Agilent_HUMAN_G3V2	NM_032148	chr12	105198851	105198910	-
LNCA_24_P126139	0.0427855	3.03456	mRNA	NM_016370	NM_016370	NM_016370	51209	Hs.522736	RAB9B	RAB9B, member RAS oncogene family	ENST00000243298	THC2601062	GO:0005515|GO:0005886|GO:0000166|GO:0007264|GO:0005575|GO:0015031|GO:0005525|GO:0006895	Homo sapiens RAB9B, member RAS oncogene family (RAB9B), mRNA [NM_016370]	chrX:103078011-103077952	hs|Xq22.2	Agilent_HUMAN_G3V2	NM_016370	chrX	103077952	103078011	-
LNCA_21_P0009385	0.0329826	3.03441	mRNA	THC2573582	NA	NA	NA	NA	XLOC_012162	NA	NA	THC2573582	NA	BC015704 joined to JAZF1 {Homo sapiens} (exp=-1; wgp=0; cg=0), partial (17%) [THC2573582]	NA	NA	Agilent_HUMAN_G3V2	THC2573582	NA	NA	NA	+
LNCA_33_P3310649	0.0207073	3.02721	mRNA	ENST00000432413	NA	NA	NA	NA	NA	NA	ENST00000432413	NA	NA	NA	chr2:208104647-208104588	hs|2q33.3	Agilent_HUMAN_G3V2	ENST00000432413	chr2	208104588	208104647	-
LNCA_23_P74701	0.00517366	3.02677	mRNA	NM_152890	NM_152890	NM_152890	255631	Hs.659516	COL24A1	collagen, type XXIV, alpha 1	ENST00000370571	NP1473048	GO:0005581|GO:0005576|GO:0007155|GO:0005201	Homo sapiens collagen, type XXIV, alpha 1 (COL24A1), mRNA [NM_152890]	chr1:86195414-86195355	hs|1p22.3	Agilent_HUMAN_G3V2	NM_152890	chr1	86195355	86195414	-
LNCA_23_P408341	0.0153729	3.02094	mRNA	NR_002781	NR_002781	NR_002781	128854	Hs.647447	TSPY26P	testis specific protein, Y-linked 26, pseudogene	NA	THC2483575	GO:0006334|GO:0005634	Homo sapiens testis specific protein, Y-linked 26, pseudogene (TSPY26P), non-coding RNA [NR_002781]	chr20:30777405-30777346	hs|20q11.21	Agilent_HUMAN_G3V2	NR_002781	chr20	30777346	30777405	-
LNCA_23_P368067	0.0332308	3.01688	mRNA	NM_018833	NM_018833	NM_018833	6891	Hs.502	TAP2	transporter 2, ATP-binding cassette, sub-family B (MDR/TAP)	ENST00000374899	THC2489715	GO:0005515|GO:0005215|GO:0002474|GO:0042825|GO:0042288|GO:0005886|GO:0005783|GO:0005743|GO:0042626|GO:0030176|GO:0005634|GO:0015031|GO:0002591|GO:0046968|GO:0046967|GO:0015833|GO:0000166|GO:0044419|GO:0019885|GO:0042605|GO:0002489|GO:0015197|GO:0016887|GO:0015421|GO:0002481|GO:0019060|GO:0046980|GO:0002485|GO:0055085|GO:0005524|GO:0016020|GO:0001916|GO:0005789|GO:0015433|GO:0016021|GO:0046978|GO:…	Homo sapiens transporter 2, ATP-binding cassette, sub-family B (MDR/TAP) (TAP2), transcript variant 2, mRNA [NM_018833]	chr6:32789863-32789804	hs|6p21.32	Agilent_HUMAN_G3V2	NM_018833	chr6	32789804	32789863	-
LNCA_33_P3350420	0.0379254	3.01521	mRNA	NM_001012980	NM_001012980	NM_001012980	340562	Hs.640783	SATL1	spermidine/spermine N1-acetyl transferase-like 1	ENST00000509231	THC2486622	GO:0016746|GO:0008080|GO:0008152	Homo sapiens spermidine/spermine N1-acetyl transferase-like 1 (SATL1), mRNA [NM_001012980]	chrX:84347359-84347300	hs|Xq21.1	Agilent_HUMAN_G3V2	NM_001012980	chrX	84347300	84347359	-
LNCA_33_P3286352	0.0129172	3.00215	mRNA	NR_027428	NR_027428	NR_027428	219347	Hs.524453	LOC219347	uncharacterized LOC219347	NA	THC2516169	NA	Homo sapiens uncharacterized LOC219347 (LOC219347), transcript variant 1, non-coding RNA [NR_027428]	chr10:81813290-81813231	hs|10q22.3	Agilent_HUMAN_G3V2	NR_027428	chr10	81813231	81813290	-
LNCA_33_P3321462	0.0254635	2.99632	mRNA	NM_001005218	NM_001005218	NM_001005218	219968	Hs.553647	OR5B21	olfactory receptor, family 5, subfamily B, member 21	ENST00000360374	NP1401793	GO:0004984|GO:0005886|GO:0004930|GO:0004872|GO:0016021|GO:0004871|GO:0050896	Homo sapiens olfactory receptor, family 5, subfamily B, member 21 (OR5B21), mRNA [NM_001005218]	chr11:58274709-58274650	hs|11q12.1	Agilent_HUMAN_G3V2	NM_001005218	chr11	58274650	58274709	-
LNCA_19_P00804924	0.0217255	2.98836	mRNA	NA	NA	NA	NA	NA	NA	NA	NA	NA	NA	NA	chr17:000056691-000056750	hs|17p13.3	Agilent_HUMAN_G3V2	NA	chr17	56691	56750	+
LNCA_33_P3299000	0.0389942	2.98814	mRNA	NM_031952	NM_031952	NM_031952	83890	Hs.50499	SPATA9	spermatogenesis associated 9	ENST00000489917	NP321147	GO:0016020|GO:0007275|GO:0016021|GO:0007283|GO:0030154	Homo sapiens spermatogenesis associated 9 (SPATA9), mRNA [NM_031952]	chr5:94994377-94994318	hs|5q15	Agilent_HUMAN_G3V2	NM_031952	chr5	94994318	94994377	-
LNCA_23_P393777	0.00132544	2.98578	mRNA	NM_000953	NM_000953	NM_000953	5729	Hs.306831	PTGDR	prostaglandin D2 receptor (DP)	ENST00000306051	THC2479798	GO:0005515|GO:0005886|GO:0004930|GO:0046085|GO:0071799|GO:0030431|GO:0004956|GO:0007186|GO:0030238|GO:0004872|GO:0001785|GO:0004871|GO:0016021	Homo sapiens prostaglandin D2 receptor (DP) (PTGDR), mRNA [NM_000953]	chr14:52743026-52743085	hs|14q22.1	Agilent_HUMAN_G3V2	NM_000953	chr14	52743026	52743085	+
LNCA_23_P320622	0.0204876	2.98558	mRNA	NR_001542	NR_001542	NR_001542	246119	NA	TTTY10	testis-specific transcript, Y-linked 10 (non-protein coding)	ENST00000439472	THC2702919	NA	Homo sapiens testis-specific transcript, Y-linked 10 (non-protein coding) (TTTY10), non-coding RNA [NR_001542]	chrY:22680163-22669290	hs|Yq11.223	Agilent_HUMAN_G3V2	NR_001542	chrY	22669290	22680163	-
LNCA_33_P3418731	0.0204452	2.95815	mRNA	NR_003127	NR_003127	NR_003127	147947	Hs.467326	ZNF542	zinc finger protein 542	ENST00000495307	THC2470906	GO:0005622|GO:0006355|GO:0008270|GO:0005634|GO:0003677|GO:0046872	Homo sapiens zinc finger protein 542 (ZNF542), transcript variant 4, non-coding RNA [NR_003127]	chr19:56891060-56891119	hs|19q13.43	Agilent_HUMAN_G3V2	NR_003127	chr19	56891060	56891119	+
LNCA_21_P0005219	0.03546	2.95512	mRNA	ENST00000442800	NA	DB517619	NA	Hs.263912	XLOC_006035	NA	ENST00000442800	THC2743649	NA	DB517619 RIKEN full-length enriched human cDNA library, testis Homo sapiens cDNA clone H013056B08 3', mRNA sequence [DB517619]	chr7:30405910-30451570	hs|7p14.3	Agilent_HUMAN_G3V2	ENST00000442800	chr7	30405910	30451570	+
LNCA_33_P3738458	0.0297826	2.94251	mRNA	NM_022648	NM_022648	NM_022648	7145	Hs.471381	TNS1	tensin 1	ENST00000171887	THC2463521	GO:0005515|GO:0010761|GO:0030055|GO:0005737|GO:0007044|GO:0003779|GO:0005856|GO:0005925	Homo sapiens tensin 1 (TNS1), mRNA [NM_022648]	chr2:218667628-218667569	hs|2q35	Agilent_HUMAN_G3V2	NM_022648	chr2	218667569	218667628	-
LNCA_23_P407206	0.00658092	2.94246	mRNA	NM_018941	NM_018941	NM_018941	2055	Hs.127675	CLN8	ceroid-lipofuscinosis, neuronal 8 (epilepsy, progressive with mental retardation)	ENST00000331222	THC2475734	GO:0008219|GO:0008361|GO:0060041|GO:0005783|GO:0006672|GO:0045494|GO:0030163|GO:0050881|GO:0033116|GO:0050884|GO:0050885|GO:0007628|GO:0046513|GO:0044257|GO:0008203|GO:0008306|GO:0060052|GO:0005793|GO:0008610|GO:0021523|GO:0043066|GO:0051348|GO:0045861|GO:0007399|GO:0016020|GO:0006869|GO:0035176|GO:0005789|GO:0051935|GO:0007006|GO:0016021|GO:0006644|GO:0007040|GO:0001306	Homo sapiens ceroid-lipofuscinosis, neuronal 8 (epilepsy, progressive with mental retardation) (CLN8), mRNA [NM_018941]	chr8:1734642-1734701	hs|8p23.3	Agilent_HUMAN_G3V2	NM_018941	chr8	1734642	1734701	+
LNCA_32_P146113	0.0154229	2.94181	mRNA	NM_145028	NM_145028	NM_145028	221481	Hs.533066	C6orf81	chromosome 6 open reading frame 81	ENST00000471400	NP1245133	GO:0005488	Homo sapiens chromosome 6 open reading frame 81 (C6orf81), mRNA [NM_145028]	chr6:35706205-35706264	hs|6p21.31	Agilent_HUMAN_G3V2	NM_145028	chr6	35706205	35706264	+
LNCA_33_P3346807	0.0191552	2.93728	mRNA	AK092544	NA	AK092544	100131581	Hs.638992	LOC100131581	uncharacterized LOC100131581	NA	THC2478143	NA	Homo sapiens cDNA FLJ35225 fis, clone PROST2001116. [AK092544]	chr8:12435876-12435935	hs|8p23.1	Agilent_HUMAN_G3V2	AK092544	chr8	12435876	12435935	+
LNCA_33_P3364904	0.0161497	2.93518	mRNA	NM_207404	NM_207404	NM_207404	389114	Hs.720173	ZNF662	zinc finger protein 662	ENST00000440367	THC2473601	GO:0005622|GO:0006355|GO:0008270|GO:0005634|GO:0003677|GO:0046872	Homo sapiens zinc finger protein 662 (ZNF662), transcript variant 1, mRNA [NM_207404]	chr3:42958868-42958927	hs|3p22.1	Agilent_HUMAN_G3V2	NM_207404	chr3	42958868	42958927	+
LNCA_23_P158925	0.00341467	2.92338	mRNA	NM_145290	NM_145290	NM_145290	166647	Hs.99195	GPR125	G protein-coupled receptor 125	ENST00000499527	THC2491482	GO:0007186|GO:0005886|GO:0007218|GO:0004930|GO:0004872|GO:0016021|GO:0004871|GO:0009897	Homo sapiens G protein-coupled receptor 125 (GPR125), mRNA [NM_145290]	chr4:22389118-22389059	hs|4p15.2	Agilent_HUMAN_G3V2	NM_145290	chr4	22389059	22389118	-
LNCA_32_P163458	0.00118902	2.91967	mRNA	NM_001004351	NM_001004351	NM_001004351	441272	Hs.703626	SPDYE3	speedy homolog E3 (Xenopus laevis)	ENST00000426970	THC2472346	NA	Homo sapiens speedy homolog E3 (Xenopus laevis) (SPDYE3), mRNA [NM_001004351]	chr7:99918531-99918590	hs|7q22.1	Agilent_HUMAN_G3V2	NM_001004351	chr7	99918531	99918590	+
LNCA_21_P0007827	0.037446	2.91559	mRNA	ENST00000542814	NA	NA	NA	NA	CCDC91	coiled-coil domain containing 91	ENST00000542814	THC2652552	GO:0005794|GO:0016020|GO:0005730|GO:0005634|GO:0015031	CR457277 {Homo sapiens} (exp=-1; wgp=0; cg=0), partial (8%) [THC2652552]	chr12:28726404-28726463	hs|12p11.22	Agilent_HUMAN_G3V2	ENST00000542814	chr12	28726404	28726463	+
LNCA_33_P3212799	0.0138935	2.90381	mRNA	NR_026997	NR_026997	NR_026997	348645	Hs.133159	C22orf34	chromosome 22 open reading frame 34	ENST00000400023	THC2483736	NA	Homo sapiens chromosome 22 open reading frame 34 (C22orf34), non-coding RNA [NR_026997]	chr22:50013355-50013296	hs|22q13.33	Agilent_HUMAN_G3V2	NR_026997	chr22	50013296	50013355	-
LNCA_32_P58614	0.0322468	2.90191	mRNA	NM_020802	NM_020802	NM_020802	57562	Hs.156352	KIAA1377	KIAA1377	ENST00000263468	NA	GO:0005515	Homo sapiens KIAA1377 (KIAA1377), mRNA [NM_020802]	chr11:101871701-101871760	hs|11q22.1	Agilent_HUMAN_G3V2	NM_020802	chr11	101871701	101871760	+
LNCA_21_P0000793	0.0432487	2.90154	mRNA	NR_038420	NR_038420	NR_038420	NA	Hs.720513	LOC100132618	uncharacterized LOC100132618	ENST00000450461	THC2500462	NA	Homo sapiens uncharacterized LOC100132618 (LOC100132618), non-coding RNA [NR_038420]	chr1:71532738-71532797	hs|1p31.1	Agilent_HUMAN_G3V2	NR_038420	chr1	71532738	71532797	+
LNCA_33_P3252083	0.00776205	2.89847	mRNA	NM_021150	NM_021150	NM_021150	23426	Hs.505946	GRIP1	glutamate receptor interacting protein 1	ENST00000398016	THC2605865	GO:0030054|GO:0005886|GO:0008013|GO:0005783|GO:0003713|GO:0045202|GO:0007268|GO:0030159|GO:0050681|GO:0008022|GO:0005829|GO:0005622|GO:0035556|GO:0045211|GO:0016023|GO:0045893|GO:0030521	Homo sapiens glutamate receptor interacting protein 1 (GRIP1), transcript variant 1, mRNA [NM_021150]	chr12:66742859-66742800	hs|12q14.3	Agilent_HUMAN_G3V2	NM_021150	chr12	66742800	66742859	-
LNCA_23_P70968	0.0238379	2.89416	mRNA	NM_006896	NM_006896	NM_006896	3204	Hs.610216	HOXA7	homeobox A7	ENST00000242159	THC2474113	GO:0003700|GO:0048704|GO:0005634|GO:0007275|GO:0000122|GO:0001525|GO:0009952|GO:0043565|GO:0045617|GO:0045656|GO:0045944|GO:0002686|GO:0045892|GO:0001953|GO:0008134	Homo sapiens homeobox A7 (HOXA7), mRNA [NM_006896]	chr7:27194490-27194431	hs|7p15.2	Agilent_HUMAN_G3V2	NM_006896	chr7	27194431	27194490	-
LNCA_33_P3219939	0.0214184	2.87896	mRNA	NM_001081	NM_001081	NM_001081	8029	Hs.166206	CUBN	cubilin (intrinsic factor-cobalamin receptor)	ENST00000377833	THC2531653	GO:0006629|GO:0020028|GO:0005215|GO:0015889|GO:0005886|GO:0005783|GO:0031526|GO:0005765|GO:0042803|GO:0005829|GO:0070207|GO:0042953|GO:0030492|GO:0005737|GO:0016324|GO:0001894|GO:0004872|GO:0008202|GO:0043202|GO:0008203|GO:0005794|GO:0031419|GO:0042359|GO:0007584|GO:0005509|GO:0005624|GO:0031232|GO:0001701|GO:0006898|GO:0030666|GO:0043234|GO:0005905|GO:0016020|GO:0006766|GO:0042157|GO:0010008|GO:…	Homo sapiens cubilin (intrinsic factor-cobalamin receptor) (CUBN), mRNA [NM_001081]	chr10:16866024-16865965	hs|10p13	Agilent_HUMAN_G3V2	NM_001081	chr10	16865965	16866024	-
LNCA_33_P3797820	0.0463248	2.86213	mRNA	ENST00000431300	NA	CR609725	NA	Hs.729096	NA	NA	ENST00000431300	THC2494870	NA	full-length cDNA clone CS0DK001YC14 of HeLa cells Cot 25-normalized of Homo sapiens (human) [CR609725]	chr10:81600705-81600764	hs|10q22.3	Agilent_HUMAN_G3V2	ENST00000431300	chr10	81600705	81600764	+
LNCA_23_P16384	0.0186588	2.85145	mRNA	NM_139176	NM_139176	NM_139176	199713	Hs.351118	NLRP7	NLR family, pyrin domain containing 7	ENST00000446217	THC2475204	GO:0000166|GO:0005524	Homo sapiens NLR family, pyrin domain containing 7 (NLRP7), transcript variant 1, mRNA [NM_139176]	chr19:55435097-55435038	hs|19q13.42	Agilent_HUMAN_G3V2	NM_139176	chr19	55435038	55435097	-
LNCA_33_P3327567	0.0276049	2.8375	mRNA	ENST00000467061	NA	AK172748	90407	Hs.677570	TMEM41A	transmembrane protein 41A	ENST00000467061	THC2486430	GO:0016020|GO:0016021	transmembrane protein 41A [Source:HGNC Symbol;Acc:30544] [ENST00000467061]	chr3:185213853-185213794	hs|3q27.2	Agilent_HUMAN_G3V2	ENST00000467061	chr3	185213794	185213853	-
LNCA_33_P3396008	0.0341459	2.83642	mRNA	NM_001206954	NM_001206954	NM_001206954	177	Hs.534342	AGER	advanced glycosylation end product-specific receptor	ENST00000375056	NP1460370	GO:0005515|GO:0030424|GO:0005886|GO:0030324|GO:0005615|GO:0031175|GO:0055074|GO:0005737|GO:0051092|GO:0006954|GO:0009925|GO:0010763|GO:0043025|GO:0004872|GO:0050785|GO:0043065|GO:0009611|GO:0005576|GO:0007259|GO:0048661|GO:0048155|GO:0050930|GO:0016020|GO:0007420|GO:0005887|GO:0045087|GO:0055093|GO:0050729|GO:0007166|GO:0004888	Homo sapiens advanced glycosylation end product-specific receptor (AGER), transcript variant 8, mRNA [NM_001206954]	chr6:32151757-32151698	hs|6p21.32	Agilent_HUMAN_G3V2	NM_001206954	chr6	32151698	32151757	-
LNCA_23_P66158	0.0288857	2.83582	mRNA	NM_001012991	NM_001012991	NM_001012991	400506	Hs.585209	C16orf88	chromosome 16 open reading frame 88	ENST00000219837	THC2510151	GO:0005730|GO:0005634	Homo sapiens chromosome 16 open reading frame 88 (C16orf88), mRNA [NM_001012991]	chr16:19717835-19717776	hs|16p12.3	Agilent_HUMAN_G3V2	NM_001012991	chr16	19717776	19717835	-
LNCA_33_P3242632	0.0412743	2.83433	mRNA	NR_033930	NR_033930	NR_033930	646743	Hs.125706	LOC646743	uncharacterized LOC646743	ENST00000419965	NP1275925	NA	Homo sapiens uncharacterized LOC646743 (LOC646743), non-coding RNA [NR_033930]	chr2:131301609-131301550	hs|2q21.1	Agilent_HUMAN_G3V2	NR_033930	chr2	131301550	131301609	-
LNCA_23_P302018	0.0105915	2.82597	mRNA	NM_003328	NM_003328	NM_003328	7294	Hs.479669	TXK	TXK tyrosine kinase	ENST00000514937	THC2476508	GO:0032729|GO:0050852|GO:0005886|GO:0006357|GO:0005634|GO:0007202|GO:0001816|GO:0003677|GO:0005524|GO:0002250|GO:0060335|GO:0005737|GO:0046777|GO:0000166|GO:0006468|GO:0001012|GO:0004715	Homo sapiens TXK tyrosine kinase (TXK), mRNA [NM_003328]	chr4:48069318-48069259	hs|4p12	Agilent_HUMAN_G3V2	NM_003328	chr4	48069259	48069318	-
LNCA_33_P3383009	0.0117186	2.79879	mRNA	NA	NA	NA	NA	NA	NA	NA	NA	NA	NA	NA	chr15:074834435-074834494	hs|15q24.1	Agilent_HUMAN_G3V2	NA	chr15	74834435	74834494	+
LNCA_33_P3241388	0.0318768	2.78713	mRNA	NM_021196	NM_021196	NM_021196	57835	Hs.594099	SLC4A5	solute carrier family 4, sodium bicarbonate cotransporter, member 5	ENST00000377634	THC2485404	GO:0005215|GO:0016324|GO:0005886|GO:0005452|GO:0015701|GO:0016021|GO:0006814|GO:0055085|GO:0008510|GO:0006811	Homo sapiens solute carrier family 4, sodium bicarbonate cotransporter, member 5 (SLC4A5), transcript variant a, mRNA [NM_021196]	chr2:74450055-74449996	hs|2p13.1	Agilent_HUMAN_G3V2	NM_021196	chr2	74449996	74450055	-
LNCA_21_P0007043	0.0423612	2.78322	mRNA	NR_040079	NR_040079	NR_040079	NA	NA	LOC399715	uncharacterized LOC399715	ENST00000399868	THC2485857	NA	Homo sapiens uncharacterized LOC399715 (LOC399715), non-coding RNA [NR_040079]	chr10:6373175-6373234	hs|10p15.1	Agilent_HUMAN_G3V2	NR_040079	chr10	6373175	6373234	+
LNCA_21_P0000535	0.000198264	2.76985	mRNA	NR_027346	NR_027346	NR_027346	NA	NA	LINC00173	long intergenic non-protein coding RNA 173	NA	THC2665867	NA	Homo sapiens long intergenic non-protein coding RNA 173 (LINC00173), transcript variant 2, non-coding RNA [NR_027346]	chr12:116974257-116974316	hs|12q24.22	Agilent_HUMAN_G3V2	NR_027346	chr12	116974257	116974316	+
LNCA_32_P505730	0.00303982	2.7678	mRNA	ENST00000304890	NA	BC017967	NA	Hs.665450	NA	NA	ENST00000304890	THC2481067	NA	major histocompatibility complex, class II, DP beta 2 (pseudogene) [Source:HGNC Symbol;Acc:4941] [ENST00000304890]	chr6:33086534-33086592	hs|6p21.32	Agilent_HUMAN_G3V2	ENST00000304890	chr6	33086534	33086592	+
LNCA_33_P3216928	0.0122387	2.76584	mRNA	ENST00000361350	XR_112074	XR_112074	NA	Hs.591438	NA	NA	ENST00000361350	THC2484121	NA	chromosome 1 open reading frame 191 [Source:HGNC Symbol;Acc:32328] [ENST00000361350]	chr1:54704650-54704709	hs|1p32.3	Agilent_HUMAN_G3V2	ENST00000361350	chr1	54704650	54704709	+
LNCA_24_P743802	0.035469	2.76118	mRNA	NM_133374	NM_133374	NM_133374	114991	Hs.349208	ZNF618	zinc finger protein 618	ENST00000288466	THC2611980	GO:0005622|GO:0006355|GO:0008270|GO:0005634|GO:0003677|GO:0046872	Homo sapiens zinc finger protein 618 (ZNF618), mRNA [NM_133374]	chr9:116818750-116818809	hs|9q32	Agilent_HUMAN_G3V2	NM_133374	chr9	116818750	116818809	+
LNCA_33_P3388482	0.0280065	2.75422	mRNA	NM_001080825	NM_001080825	NM_001080825	144404	Hs.644504	TMEM120B	transmembrane protein 120B	ENST00000342607	THC2495834	GO:0008150|GO:0003674|GO:0016020|GO:0016021|GO:0005575	Homo sapiens transmembrane protein 120B (TMEM120B), mRNA [NM_001080825]	chr12:122213575-122213634	hs|12q24.31	Agilent_HUMAN_G3V2	NM_001080825	chr12	122213575	122213634	+
LNCA_33_P3384845	0.0270785	2.74813	mRNA	NM_172236	NM_172236	NM_172236	23509	Hs.472409	POFUT1	protein O-fucosyltransferase 1	ENST00000375730	THC2474521	GO:0006355|GO:0016757|GO:0005783|GO:0005975|GO:0001756|GO:0008417|GO:0046922|GO:0016266|GO:0001525|GO:0009790|GO:0007399|GO:0007507|GO:0006493|GO:0007219|GO:0016020|GO:0006004	Homo sapiens protein O-fucosyltransferase 1 (POFUT1), transcript variant 2, mRNA [NM_172236]	chr20:30805666-30805725	hs|20q11.21	Agilent_HUMAN_G3V2	NM_172236	chr20	30805666	30805725	+
LNCA_21_P0012461	0.00322742	2.74788	mRNA	AK096589	NA	AK096589	NA	Hs.477537	RPL32P3	ribosomal protein L32 pseudogene 3	NA	THC2509642	NA	Q9HAT9_HUMAN (Q9HAT9) SPG protein, partial (3%) [THC2509642]	chr3:129107942-129107883	hs|3q21.3	Agilent_HUMAN_G3V2	AK096589	chr3	129107883	129107942	-
LNCA_33_P3254761	0.00134494	2.74723	mRNA	THC2688558	NA	NA	NA	NA	NA	NA	NA	THC2688558	NA	NA	chr8:001920907-001920848	hs|8p23.3	Agilent_HUMAN_G3V2	THC2688558	chr8	1920848	1920907	-
LNCA_21_P0013636	0.0223652	2.74431	mRNA	NR_003366	NR_003366	NR_003366	NA	Hs.712862	ANKRD20A8P	ankyrin repeat domain 20 family, member A8, pseudogene	ENST00000456982	THC2538425	NA	Homo sapiens ankyrin repeat domain 20 family, member A8, pseudogene (ANKRD20A8P), non-coding RNA [NR_003366]	chr2:95472150-95472091	hs|2q11.1	Agilent_HUMAN_G3V2	NR_003366	chr2	95472091	95472150	-
LNCA_33_P3291594	0.00539241	2.73885	mRNA	ENST00000370131	NA	M19301	1629	Hs.709187	DBT	dihydrolipoamide branched chain transacylase E2	ENST00000370131	THC2489052	GO:0042645|GO:0048037|GO:0016746|GO:0043754|GO:0009083|GO:0005739|GO:0034641|GO:0005737|GO:0005759|GO:0008152|GO:0015630|GO:0005947|GO:0046949	dihydrolipoamide branched chain transacylase E2 [Source:HGNC Symbol;Acc:2698] [ENST00000370131]	chr1:100676204-100676145	hs|1p21.2	Agilent_HUMAN_G3V2	ENST00000370131	chr1	100676145	100676204	-
LNCA_23_P94840	0.00852019	2.73638	mRNA	NM_130897	NM_130897	NM_130897	83657	Hs.98849	DYNLRB2	dynein, light chain, roadblock-type 2	ENST00000338542	THC2702482	GO:0005737|GO:0005874|GO:0006810|GO:0005868|GO:0005856|GO:0003777|GO:0007018	Homo sapiens dynein, light chain, roadblock-type 2 (DYNLRB2), mRNA [NM_130897]	chr16:80584417-80584476	hs|16q23.2	Agilent_HUMAN_G3V2	NM_130897	chr16	80584417	80584476	+
LNCA_32_P416161	0.0144717	2.73551	mRNA	NM_212559	NM_212559	NM_212559	402415	Hs.364911	XKRX	XK, Kell blood group complex subunit-related, X-linked	ENST00000372956	THC2477078	GO:0005886|GO:0016021	Homo sapiens XK, Kell blood group complex subunit-related, X-linked (XKRX), mRNA [NM_212559]	chrX:100168965-100168906	hs|Xq22.1	Agilent_HUMAN_G3V2	NM_212559	chrX	100168906	100168965	-
LNCA_23_P60079	0.0465359	2.73445	mRNA	NM_001147	NM_001147	NM_001147	285	Hs.583870	ANGPT2	angiopoietin 2	ENST00000415216	THC2463678	GO:0005515|GO:0014070|GO:0005886|GO:0031100|GO:0010812|GO:0005634|GO:0042995|GO:0050928|GO:0050900|GO:0007281|GO:0005615|GO:0030154|GO:0046872|GO:0009314|GO:0001666|GO:0014823|GO:0030971|GO:0048014|GO:0060135|GO:0005102|GO:0007275|GO:0005576|GO:0045766|GO:0009612|GO:0009749|GO:0007165|GO:0007596|GO:0016525|GO:0043537	Homo sapiens angiopoietin 2 (ANGPT2), transcript variant 1, mRNA [NM_001147]	chr8:6360349-6360290	hs|8p23.1	Agilent_HUMAN_G3V2	NM_001147	chr8	6360290	6360349	-
LNCA_33_P3238295	0.0173821	2.72251	mRNA	NR_026788	NR_026788	NR_026788	440078	Hs.512257	FAM66C	family with sequence similarity 66, member C	ENST00000544214	THC2528089	NA	Homo sapiens family with sequence similarity 66, member C (FAM66C), non-coding RNA [NR_026788]	chr12:8353386-8353445	hs|12p13.31	Agilent_HUMAN_G3V2	NR_026788	chr12	8353386	8353445	+
LNCA_33_P3396224	0.038509	2.72002	mRNA	NM_001013698	NM_001013698	NM_001013698	440087	Hs.220931	C12orf69	chromosome 12 open reading frame 69	ENST00000316048	THC2478653	GO:0016020|GO:0016021	Homo sapiens chromosome 12 open reading frame 69 (C12orf69), mRNA [NM_001013698]	chr12:14957712-14957653	hs|12p12.3	Agilent_HUMAN_G3V2	NM_001013698	chr12	14957653	14957712	-
LNCA_23_P365412	0.0207675	2.71632	mRNA	NM_181644	NM_181644	NM_181644	148808	Hs.567714	MFSD4	major facilitator superfamily domain containing 4	ENST00000367147	THC2514128	GO:0016020|GO:0016021|GO:0055085	Homo sapiens major facilitator superfamily domain containing 4 (MFSD4), mRNA [NM_181644]	chr1:205571081-205571140	hs|1q32.1	Agilent_HUMAN_G3V2	NM_181644	chr1	205571081	205571140	+
LNCA_24_P268729	0.0209957	2.71568	mRNA	NM_016173	NM_016173	NM_016173	51409	Hs.517987	HEMK1	HemK methyltransferase family member 1	ENST00000448997	THC2502773	GO:0006306|GO:0005739|GO:0008276|GO:0008170|GO:0003677|GO:0016740	Homo sapiens HemK methyltransferase family member 1 (HEMK1), mRNA [NM_016173]	chr3:50621340-50621399	hs|3p21.2	Agilent_HUMAN_G3V2	NM_016173	chr3	50621340	50621399	+
LNCA_32_P62863	0.0449404	2.70704	mRNA	NM_014575	NM_014575	NM_014575	29970	Hs.134665	SCHIP1	schwannomin interacting protein 1	ENST00000412423	NP175795	GO:0005515|GO:0006807|GO:0001822|GO:0001553|GO:0048705|GO:0009791|GO:0042802|GO:0008150|GO:0008210|GO:0008585|GO:0010761|GO:0005737|GO:0060325|GO:0048745|GO:0060021|GO:0048008	Homo sapiens schwannomin interacting protein 1 (SCHIP1), transcript variant 1, mRNA [NM_014575]	chr3:159615048-159615107	hs|3q25.33	Agilent_HUMAN_G3V2	NM_014575	chr3	159615048	159615107	+
LNCA_32_P216734	0.00302218	2.70303	mRNA	NM_001004351	NM_001004351	NM_001004351	441272	Hs.703626	SPDYE3	speedy homolog E3 (Xenopus laevis)	ENST00000426970	THC2472346	NA	Homo sapiens speedy homolog E3 (Xenopus laevis) (SPDYE3), mRNA [NM_001004351]	chr7:99918578-99918637	hs|7q22.1	Agilent_HUMAN_G3V2	NM_001004351	chr7	99918578	99918637	+
LNCA_21_P0010940	0.0229502	2.69881	mRNA	NM_001100874	NM_001100874	NM_001100874	NA	Hs.666728	SLC9B1	solute carrier family 9, subfamily B (cation proton antiporter 2), member 1	ENST00000416231	THC2606103	GO:0016020|GO:0015299|GO:0016021|GO:0055085|GO:0006812	Homo sapiens solute carrier family 9, subfamily B (cation proton antiporter 2), member 1 (SLC9B1), nuclear gene encoding mitochondrial protein, transcript variant 2, mRNA [NM_001100874]	chr4:103826795-103826736	hs|4q24	Agilent_HUMAN_G3V2	NM_001100874	chr4	103826736	103826795	-
LNCA_24_P944588	0.0173829	2.697	mRNA	NM_033196	NM_033196	NM_033196	91120	Hs.306298	ZNF682	zinc finger protein 682	ENST00000341262	THC2480377	GO:0005622|GO:0006355|GO:0008270|GO:0005634|GO:0003677|GO:0046872	Homo sapiens zinc finger protein 682 (ZNF682), transcript variant 1, mRNA [NM_033196]	chr19:20115520-20115461	hs|19p12	Agilent_HUMAN_G3V2	NM_033196	chr19	20115461	20115520	-
LNCA_33_P3213086	0.0404007	2.68512	mRNA	ENST00000442192	NA	BX457161	NA	Hs.721707	NA	NA	ENST00000442192	THC2553396	NA	ankyrin repeat domain 20 family, member A11, pseudogene [Source:HGNC Symbol;Acc:42024] [ENST00000442192]	chr21:15304666-15304609	hs|21q11.2	Agilent_HUMAN_G3V2	ENST00000442192	chr21	15304609	15304666	-
LNCA_33_P3317580	0.021248	2.67907	mRNA	NM_001495	NM_001495	NM_001495	2675	Hs.441202	GFRA2	GDNF family receptor alpha 2	ENST00000400782	THC2471745	GO:0016167|GO:0005886|GO:0035860|GO:0004872|GO:0031225|GO:0007169|GO:0019898	Homo sapiens GDNF family receptor alpha 2 (GFRA2), transcript variant 1, mRNA [NM_001495]	chr8_gl000197_random:24211-24270	NA	Agilent_HUMAN_G3V2	NM_001495	chr8_gl000197_random	24211	24270	+
LNCA_33_P3303945	0.0271445	2.6755	mRNA	NM_001005175	NM_001005175	NM_001005175	390072	Hs.553735	OR52N4	olfactory receptor, family 52, subfamily N, member 4	ENST00000317254	NP1470750	GO:0004984|GO:0005886|GO:0004930|GO:0004872|GO:0016021|GO:0004871|GO:0050896	Homo sapiens olfactory receptor, family 52, subfamily N, member 4 (OR52N4), mRNA [NM_001005175]	chr11:5776877-5776936	hs|11p15.4	Agilent_HUMAN_G3V2	NM_001005175	chr11	5776877	5776936	+
LNCA_33_P3687389	0.0298693	2.6751	mRNA	CA309819	NA	CA309819	53393	Hs.659206	C17orf13	chromosome 17 open reading frame 13	NA	NA	NA	UI-H-FT1-bic-j-12-0-UI.s1 NCI_CGAP_FT1 Homo sapiens cDNA clone UI-H-FT1-bic-j-12-0-UI 3', mRNA sequence [CA309819]	chr17:2005059-2005000	hs|17p13.3	Agilent_HUMAN_G3V2	CA309819	chr17	2005000	2005059	-
LNCA_33_P3286372	0.0342249	2.67001	mRNA	ENST00000381786	NA	AK057831	348738	Hs.676025	C2orf48	chromosome 2 open reading frame 48	ENST00000381786	NA	NA	chromosome 2 open reading frame 48 [Source:HGNC Symbol;Acc:26322] [ENST00000381786]	chr2:10351473-10351532	hs|2p25.1	Agilent_HUMAN_G3V2	ENST00000381786	chr2	10351473	10351532	+
LNCA_23_P154806	0.00835113	2.6529	mRNA	NM_012156	NM_012156	NM_012156	2036	Hs.437422	EPB41L1	erythrocyte membrane protein band 4.1-like 1	ENST00000373951	THC2523234	GO:0008092|GO:0005737|GO:0005886|GO:0030866|GO:0005488|GO:0005198|GO:0007268|GO:0003779|GO:0005856|GO:0019898|GO:0005829	Homo sapiens erythrocyte membrane protein band 4.1-like 1 (EPB41L1), transcript variant 1, mRNA [NM_012156]	chr20:34818126-34818185	hs|20q11.23	Agilent_HUMAN_G3V2	NM_012156	chr20	34818126	34818185	+
LNCA_33_P3407540	0.0135618	2.64603	mRNA	ENST00000380578	NA	AK098253	6399	NA	TRAPPC2	trafficking protein particle complex 2	ENST00000380578	THC2723587	GO:0006888|GO:0005622|GO:0005515|GO:0048471|GO:0006355|GO:0005737|GO:0001501|GO:0005794|GO:0005783|GO:0005634|GO:0016192|GO:0008134	trafficking protein particle complex 2 [Source:HGNC Symbol;Acc:23068] [ENST00000380578]	chrX:13733706-13733647	hs|Xp22.2	Agilent_HUMAN_G3V2	ENST00000380578	chrX	13733647	13733706	-
LNCA_33_P3209200	0.0240006	2.64158	mRNA	DA858408	NA	DA858408	NA	Hs.641015	NA	NA	NA	NA	NA	DA858408 PLACE7 Homo sapiens cDNA clone PLACE7009954 5', mRNA sequence [DA858408]	chr15:32879755-32879814	hs|15q13.3	Agilent_HUMAN_G3V2	DA858408	chr15	32879755	32879814	+
LNCA_23_P329375	0.0179274	2.64109	mRNA	NM_002702	NM_002702	NM_002702	5463	Hs.555886	POU6F1	POU class 6 homeobox 1	ENST00000550824	THC2473613	GO:0043565|GO:0007507|GO:0006355|GO:0007517|GO:0003700|GO:0007420|GO:0005634	Homo sapiens POU class 6 homeobox 1 (POU6F1), transcript variant 1, mRNA [NM_002702]	chr12:51583372-51583313	hs|12q13.13	Agilent_HUMAN_G3V2	NM_002702	chr12	51583313	51583372	-
LNCA_33_P3733115	0.0150739	2.63784	mRNA	AK124496	NA	AK124496	NA	Hs.640217	NA	NA	NA	THC2481196	NA	Homo sapiens cDNA FLJ42505 fis, clone BRACE2040138. [AK124496]	chr8:7104039-7103980	hs|8p23.1	Agilent_HUMAN_G3V2	AK124496	chr8	7103980	7104039	-
LNCA_23_P25994	0.0108774	2.63649	mRNA	NM_001008530	NM_001008530	NM_001008530	5641	Hs.18069	LGMN	legumain	ENST00000557725	NP1188457	GO:0005770|GO:0042359|GO:0045177|GO:0004197|GO:0043524|GO:0040015|GO:0004674|GO:0006766|GO:0006508|GO:0001101|GO:0008233|GO:0008202|GO:0043202	Homo sapiens legumain (LGMN), transcript variant 2, mRNA [NM_001008530]	chr14:93178016-93176171	hs|14q32.12	Agilent_HUMAN_G3V2	NM_001008530	chr14	93176171	93178016	-
LNCA_23_P20743	0.0101905	2.63334	mRNA	NM_032342	NM_032342	NM_032342	84302	Hs.655738	C9orf125	chromosome 9 open reading frame 125	ENST00000374851	THC2607516	GO:0016020|GO:0016021	Homo sapiens chromosome 9 open reading frame 125 (C9orf125), mRNA [NM_032342]	chr9:104237694-104237635	hs|9q31.1	Agilent_HUMAN_G3V2	NM_032342	chr9	104237635	104237694	-
LNCA_21_P0000702	0.00114485	2.62501	mRNA	NR_037888	NR_037888	NR_037888	NA	Hs.276795	LOC100507266	uncharacterized LOC100507266	NA	THC2500037	NA	Homo sapiens uncharacterized LOC100507266 (LOC100507266), non-coding RNA [NR_037888]	chr4:4712531-4712590	hs|4p16.2	Agilent_HUMAN_G3V2	NR_037888	chr4	4712531	4712590	+
LNCA_24_P254084	0.0255388	2.62234	mRNA	NM_021915	NM_021915	NM_021915	7620	Hs.661955	ZNF69	zinc finger protein 69	ENST00000304060	THC2476903	GO:0005622|GO:0006355|GO:0003700|GO:0008270|GO:0005634|GO:0003677|GO:0046872	Homo sapiens zinc finger protein 69 (ZNF69), mRNA [NM_021915]	chr19:12024601-12024660	hs|19p13.2	Agilent_HUMAN_G3V2	NM_021915	chr19	12024601	12024660	+
LNCA_23_P74467	0.0334792	2.62085	mRNA	NM_014949	NM_014949	NM_014949	22889	Hs.728984	KIAA0907	KIAA0907	ENST00000368320	NP1188879	NA	Homo sapiens KIAA0907 (KIAA0907), mRNA [NM_014949]	chr1:155883487-155883428	hs|1q22	Agilent_HUMAN_G3V2	NM_014949	chr1	155883428	155883487	-
LNCA_33_P3329356	0.0494067	2.6171	mRNA	ENST00000512129	NA	NA	NA	NA	NA	NA	ENST00000512129	NA	NA	NA	chr4:109177933-109177992	hs|4q25	Agilent_HUMAN_G3V2	ENST00000512129	chr4	109177933	109177992	+
LNCA_33_P3267989	0.0168905	2.61638	mRNA	NM_052964	NM_052964	NM_052964	116449	Hs.678910	CLNK	cytokine-dependent hematopoietic cell linker	ENST00000429087	THC2487286	GO:0035556|GO:0005622|GO:0006955|GO:0005070|GO:0007169	Homo sapiens cytokine-dependent hematopoietic cell linker (CLNK), mRNA [NM_052964]	chr4:10491965-10491906	hs|4p16.1	Agilent_HUMAN_G3V2	NM_052964	chr4	10491906	10491965	-
LNCA_33_P3376873	0.0141092	2.60943	mRNA	BC041650	NA	BC041650	NA	Hs.676041	NA	NA	NA	THC2506804	NA	Homo sapiens, clone IMAGE:5480271, mRNA. [BC041650]	chr16:8956083-8956024	hs|16p13.2	Agilent_HUMAN_G3V2	BC041650	chr16	8956024	8956083	-
LNCA_23_P379200	0.0361686	2.60558	mRNA	NM_175736	NM_175736	NM_175736	91010	Hs.179838	FMNL3	formin-like 3	ENST00000335154	THC2610173	GO:0005737|GO:0030036|GO:0016477|GO:0005488|GO:0008360|GO:0007010|GO:0017048|GO:0003779|GO:0016043	Homo sapiens formin-like 3 (FMNL3), transcript variant 1, mRNA [NM_175736]	chr12:50032708-50032649	hs|12q13.12	Agilent_HUMAN_G3V2	NM_175736	chr12	50032649	50032708	-
LNCA_23_P70509	0.00262935	2.60549	mRNA	NM_024909	NM_024909	NM_024909	79969	Hs.654798	ATAT1	alpha tubulin acetyltransferase 1	ENST00000376483	THC2492202	GO:0019799|GO:0016740	Homo sapiens alpha tubulin acetyltransferase 1 (ATAT1), transcript variant 2, mRNA [NM_024909]	chr6:30611911-30611970	hs|6p21.33	Agilent_HUMAN_G3V2	NM_024909	chr6	30611911	30611970	+
LNCA_23_P424582	0.0446785	2.60085	mRNA	NM_030652	NM_030652	NM_030652	80864	Hs.332138	EGFL8	EGF-like-domain, multiple 8	ENST00000490624	THC2471276	GO:0005509|GO:0005576|GO:0016021|GO:0001701	Homo sapiens EGF-like-domain, multiple 8 (EGFL8), transcript variant 1, mRNA [NM_030652]	chr6:32135924-32135986	hs|6p21.32	Agilent_HUMAN_G3V2	NM_030652	chr6	32135924	32135986	+
LNCA_33_P3288919	0.0148933	2.59596	mRNA	NA	NA	NA	NA	NA	NA	NA	NA	NA	NA	NA	chr6:152488918-152488859	hs|6q25.1	Agilent_HUMAN_G3V2	NA	chr6	152488859	152488918	-
LNCA_23_P316511	0.0444759	2.59508	mRNA	NM_002146	NM_002146	NM_002146	3213	Hs.654560	HOXB3	homeobox B3	ENST00000311626	THC2473353	GO:0043565|GO:0003700|GO:0048704|GO:0007275|GO:0005634|GO:0030878|GO:0001525	Homo sapiens homeobox B3 (HOXB3), mRNA [NM_002146]	chr17:46627361-46627302	hs|17q21.32	Agilent_HUMAN_G3V2	NM_002146	chr17	46627302	46627361	-
LNCA_33_P3402823	0.0450175	2.59322	mRNA	NM_001010862	NM_001010862	NM_001010862	169981	Hs.522672	SPIN3	spindlin family, member 3	ENST00000374915	THC2618315	GO:0007276	Homo sapiens spindlin family, member 3 (SPIN3), transcript variant 1, mRNA [NM_001010862]	chrX:57021222-57021163	hs|Xp11.21	Agilent_HUMAN_G3V2	NM_001010862	chrX	57021163	57021222	-
LNCA_33_P3338071	0.0424899	2.59298	mRNA	NA	NA	NA	NA	NA	NA	NA	NA	NA	NA	NA	chr1:161518039-161517980	hs|1q23.3	Agilent_HUMAN_G3V2	NA	chr1	161517980	161518039	-
LNCA_33_P3375127	0.0346128	2.5827	mRNA	AK092544	NA	AK092544	100131581	Hs.638992	LOC100131581	uncharacterized LOC100131581	NA	THC2478143	NA	Homo sapiens cDNA FLJ35225 fis, clone PROST2001116. [AK092544]	chr8:12436925-12436984	hs|8p23.1	Agilent_HUMAN_G3V2	AK092544	chr8	12436925	12436984	+
LNCA_23_P58009	0.0358591	2.58228	mRNA	NM_024616	NM_024616	NM_024616	79669	Hs.434247	C3orf52	chromosome 3 open reading frame 52	ENST00000264848	THC2472419	GO:0016020|GO:0005783|GO:0005789|GO:0016021	Homo sapiens chromosome 3 open reading frame 52 (C3orf52), transcript variant 2, mRNA [NM_024616]	chr3:111836665-111836724	hs|3q13.2	Agilent_HUMAN_G3V2	NM_024616	chr3	111836665	111836724	+
LNCA_33_P3319140	0.038815	2.58153	mRNA	ENST00000425591	NA	AK127966	NA	Hs.689473	NA	NA	ENST00000425591	THC2478434	NA	Homo sapiens cDNA FLJ46080 fis, clone TESTI2004971. [AK127966]	chr7:153754766-153754707	hs|7q36.2	Agilent_HUMAN_G3V2	ENST00000425591	chr7	153754707	153754766	-
LNCA_23_P130787	0.0209857	2.57413	mRNA	NM_017659	NM_017659	NM_017659	54814	Hs.631556	QPCTL	glutaminyl-peptide cyclotransferase-like	ENST00000012049	THC2485671	GO:0016603|GO:0016746|GO:0005794|GO:0016020|GO:0000139|GO:0006508|GO:0008270|GO:0008233|GO:0016021|GO:0017186|GO:0046872	Homo sapiens glutaminyl-peptide cyclotransferase-like (QPCTL), transcript variant 1, mRNA [NM_017659]	chr19:46206420-46206479	hs|19q13.32	Agilent_HUMAN_G3V2	NM_017659	chr19	46206420	46206479	+
LNCA_23_P159027	0.0290759	2.57332	mRNA	NM_015461	NM_015461	NM_015461	25925	Hs.116935	ZNF521	zinc finger protein 521	ENST00000361524	THC2462504	NA	Homo sapiens zinc finger protein 521 (ZNF521), mRNA [NM_015461]	chr18:22642053-22641994	hs|18q11.2	Agilent_HUMAN_G3V2	NM_015461	chr18	22641994	22642053	-
LNCA_23_P345220	0.00127404	2.5722	mRNA	NM_014631	NM_014631	NM_014631	9644	Hs.594708	SH3PXD2A	SH3 and PX domains 2A	ENST00000315994	THC2492107	GO:0005515|GO:0005737|GO:0030054|GO:0007154|GO:0006801|GO:0002102|GO:0042995|GO:0035091	Homo sapiens SH3 and PX domains 2A (SH3PXD2A), mRNA [NM_014631]	chr10:105359548-105359489	hs|10q24.33	Agilent_HUMAN_G3V2	NM_014631	chr10	105359489	105359548	-
LNCA_23_P327156	0.0289137	2.56977	mRNA	NR_024334	NR_024334	NR_024334	645431	Hs.713717	LOC645431	uncharacterized LOC645431	NA	THC2479356	NA	Homo sapiens uncharacterized LOC645431 (LOC645431), non-coding RNA [NR_024334]	chr14:65878097-65878038	hs|14q23.3	Agilent_HUMAN_G3V2	NR_024334	chr14	65878038	65878097	-
LNCA_21_P0003915	0.0202169	2.56906	mRNA	THC2612998	NA	NA	NA	NA	XLOC_004205	NA	NA	THC2612998	NA	ALU7_HUMAN (P39194) Alu subfamily SQ sequence contamination warning entry, partial (7%) [THC2612998]	chr4:185303343-185303287	hs|4q35.1	Agilent_HUMAN_G3V2	THC2612998	chr4	185303287	185303343	-
LNCA_33_P3329898	0.0364517	2.5688	mRNA	CR627426	NA	CR627426	NA	Hs.122061	NA	NA	NA	THC2523495	NA	Homo sapiens mRNA; cDNA DKFZp686O248 (from clone DKFZp686O248). [CR627426]	chr15:42964889-42964948	hs|15q15.2	Agilent_HUMAN_G3V2	CR627426	chr15	42964889	42964948	+
LNCA_23_P64611	0.0136152	2.56379	mRNA	NM_176798	NM_176798	NM_176798	5031	Hs.16362	P2RY6	pyrimidinergic receptor P2Y, G-protein coupled, 6	ENST00000538328	THC2603885	GO:0005886|GO:0045028|GO:0005887|GO:0004930|GO:0007200|GO:0004872|GO:0004871	Homo sapiens pyrimidinergic receptor P2Y, G-protein coupled, 6 (P2RY6), transcript variant 2, mRNA [NM_176798]	chr11:73008625-73008684	hs|11q13.4	Agilent_HUMAN_G3V2	NM_176798	chr11	73008625	73008684	+
LNCA_33_P3225610	0.0156173	2.56262	mRNA	AY358225	NA	AY358225	NA	Hs.662344	NA	NA	NA	THC2488066	NA	Homo sapiens clone DNA86575 GRTR3118 (UNQ3118) mRNA, complete cds. [AY358225]	chr16:4543819-4543878	hs|16p13.3	Agilent_HUMAN_G3V2	AY358225	chr16	4543819	4543878	+
LNCA_33_P3399985	0.0276085	2.56026	mRNA	ENST00000462693	NA	AJ272081	NA	Hs.535593	NA	NA	ENST00000462693	NP1474898	NA	immunoglobulin kappa variable 2D-24 (non-functional) [Source:HGNC Symbol;Acc:5797] [ENST00000462693]	chr2:90044286-90044345	hs|2p11.2	Agilent_HUMAN_G3V2	ENST00000462693	chr2	90044286	90044345	+
LNCA_23_P157299	0.0302099	2.55879	mRNA	NM_001129	NM_001129	NM_001129	165	Hs.439463	AEBP1	AE binding protein 1	ENST00000413907	THC2469029	GO:0006355|GO:0003700|GO:0003714|GO:0005576|GO:0005634|GO:0003677|GO:0005615|GO:0031012|GO:0001501|GO:0005737|GO:0007517|GO:0004180|GO:0006508|GO:0008270|GO:0007155|GO:0004181	Homo sapiens AE binding protein 1 (AEBP1), mRNA [NM_001129]	chr7:44153822-44153881	hs|7p13	Agilent_HUMAN_G3V2	NM_001129	chr7	44153822	44153881	+
LNCA_33_P3376541	0.0335209	2.55868	mRNA	NM_001037228	NM_001037228	NM_001037228	285033	Hs.58648	LOC285033	uncharacterized LOC285033	ENST00000432267	THC2487741	NA	Homo sapiens uncharacterized LOC285033 (LOC285033), mRNA [NM_001037228]	chr2:96906159-96906218	hs|2q11.2	Agilent_HUMAN_G3V2	NM_001037228	chr2	96906159	96906218	+
LNCA_21_P0006503	0.0314272	2.55679	mRNA	CN284311	NA	CN284311	NA	Hs.533278	XLOC_008001	NA	NA	NA	NA	17000531326764 GRN_ES Homo sapiens cDNA 5', mRNA sequence [CN284311]	chrX:64588837-64618490	hs|Xq11.2	Agilent_HUMAN_G3V2	CN284311	chrX	64588837	64618490	+
LNCA_33_P3365586	0.0301779	2.55398	mRNA	NM_004738	NM_004738	NM_004738	9217	Hs.182625	VAPB	VAMP (vesicle-associated membrane protein)-associated protein B and C	ENST00000265619	THC2521716	GO:0005515|GO:0006665|GO:0008219|GO:0005794|GO:0046982|GO:0005783|GO:0048487|GO:0042803|GO:0030968|GO:0016020|GO:0005198|GO:0044419|GO:0019048|GO:0005789|GO:0016021|GO:0019899|GO:0045070	Homo sapiens VAMP (vesicle-associated membrane protein)-associated protein B and C (VAPB), transcript variant 1, mRNA [NM_004738]	chr20:57021815-57021874	hs|20q13.32	Agilent_HUMAN_G3V2	NM_004738	chr20	57021815	57021874	+
LNCA_24_P456723	0.0417761	2.55143	mRNA	NR_038386	NR_038386	NR_038386	728537	Hs.469369	LOC728537	uncharacterized LOC728537	ENST00000451384	THC2655845	NA	Homo sapiens uncharacterized LOC728537 (LOC728537), non-coding RNA [NR_038386]	chr2:98319403-98319462	hs|2q11.2	Agilent_HUMAN_G3V2	NR_038386	chr2	98319403	98319462	+
LNCA_24_P181422	0.0486996	2.54513	mRNA	NM_172097	NM_172097	NM_172097	117155	Hs.662284	CATSPER2	cation channel, sperm associated 2	ENST00000415968	THC2475220	GO:0005515|GO:0005262|GO:0020017|GO:0005244|GO:0001539|GO:0005886|GO:0007275|GO:0030317|GO:0007283|GO:0055085|GO:0030154|GO:0009566|GO:0005929|GO:0009434|GO:0016021|GO:0006811	Homo sapiens cation channel, sperm associated 2 (CATSPER2), transcript variant 4, mRNA [NM_172097]	chr15:43931908-43931849	hs|15q15.3	Agilent_HUMAN_G3V2	NM_172097	chr15	43931849	43931908	-
LNCA_21_P0000041	0.0468167	2.54372	mRNA	NM_001164390	NM_001164390	NM_001164390	NA	NA	RAPGEF6	Rap guanine nucleotide exchange factor (GEF) 6	ENST00000510071	THC2787060	GO:0005622|GO:0005085|GO:0051056|GO:0007165|GO:0030742|GO:0005737|GO:0005886|GO:0005730|GO:0007265|GO:0005634|GO:0017016|GO:0043087	Homo sapiens Rap guanine nucleotide exchange factor (GEF) 6 (RAPGEF6), transcript variant 6, mRNA [NM_001164390]	chr5:130799448-130799389	hs|5q31.1	Agilent_HUMAN_G3V2	NM_001164390	chr5	130799389	130799448	-
LNCA_23_P103756	0.01289	2.54096	mRNA	NM_002557	NM_002557	NM_002557	5016	Hs.1154	OVGP1	oviductal glycoprotein 1, 120kDa	ENST00000434331	NP1473905	GO:0030133|GO:0007338|GO:0006032|GO:0007565|GO:0043169|GO:0005975|GO:0031410|GO:0003824|GO:0004568	Homo sapiens oviductal glycoprotein 1, 120kDa (OVGP1), mRNA [NM_002557]	chr1:111957328-111957269	hs|1p13.2	Agilent_HUMAN_G3V2	NM_002557	chr1	111957269	111957328	-
LNCA_23_P146849	0.0456349	2.53861	mRNA	NM_005503	NM_005503	NM_005503	321	Hs.618112	APBA2	amyloid beta (A4) precursor protein-binding, family A, member 2	ENST00000411764	THC2463766	GO:0005515|GO:0001540|GO:0035264|GO:0005886|GO:0007626|GO:0015031|GO:0001701|GO:0007399	Homo sapiens amyloid beta (A4) precursor protein-binding, family A, member 2 (APBA2), transcript variant 1, mRNA [NM_005503]	chr15:29409953-29410012	hs|15q13.1	Agilent_HUMAN_G3V2	NM_005503	chr15	29409953	29410012	+
LNCA_33_P3401902	0.0302382	2.5335	mRNA	NM_001012421	NM_001012421	NM_001012421	441430	Hs.632663	ANKRD20A2	ankyrin repeat domain 20 family, member A2	ENST00000437865	THC2503830	NA	Homo sapiens ankyrin repeat domain 20 family, member A2 (ANKRD20A2), mRNA [NM_001012421]	chr9:42396424-42406729	hs|9p12	Agilent_HUMAN_G3V2	NM_001012421	chr9	42396424	42406729	+
LNCA_33_P3294089	0.0190972	2.5322	mRNA	NA	NA	NA	NA	NA	NA	NA	NA	NA	NA	NA	chr11:003105573-003105514	hs|11p15.4	Agilent_HUMAN_G3V2	NA	chr11	3105514	3105573	-
LNCA_24_P194755	0.0260249	2.53143	mRNA	NM_032853	NM_032853	NM_032853	84939	Hs.515016	MUM1	melanoma associated antigen (mutated) 1	ENST00000542512	THC2612138	GO:0005515|GO:0006281|GO:0006325|GO:0031491|GO:0005634	Homo sapiens melanoma associated antigen (mutated) 1 (MUM1), transcript variant 1, mRNA [NM_032853]	chr19:1360531-1360590	hs|19p13.3	Agilent_HUMAN_G3V2	NM_032853	chr19	1360531	1360590	+
LNCA_33_P3233906	0.0455979	2.52536	mRNA	NM_005855	NM_005855	NM_005855	10267	Hs.471783	RAMP1	receptor (G protein-coupled) activity modifying protein 1	ENST00000254661	THC2464432	GO:0008277|GO:0005886|GO:0005887|GO:0008565|GO:0004872|GO:0015031|GO:0015026|GO:0006886|GO:0005615	Homo sapiens receptor (G protein-coupled) activity modifying protein 1 (RAMP1), mRNA [NM_005855]	chr2:238820539-238820598	hs|2q37.3	Agilent_HUMAN_G3V2	NM_005855	chr2	238820539	238820598	+
LNCA_33_P3883985	0.041743	2.52318	mRNA	NR_036442	NR_036442	NR_036442	64788	Hs.371980	LMF1	lipase maturation factor 1	NA	THC2605210	GO:0006888|GO:0090181|GO:0051604|GO:0009306|GO:0016020|GO:0034382|GO:0005783|GO:0033578|GO:0005789|GO:0016021|GO:0090207|GO:0051006	Homo sapiens lipase maturation factor 1 (LMF1), transcript variant 4, non-coding RNA [NR_036442]	chr16:1025821-1025762	hs|16p13.3	Agilent_HUMAN_G3V2	NR_036442	chr16	1025762	1025821	-
LNCA_21_P0011819	0.0380039	2.52197	mRNA	THC2615552	NA	NA	NA	NA	XLOC_l2_007433	NA	NA	THC2615552	NA	Q5QPL3_HUMAN (Q5QPL3) Novel zinc finger protein (Fragment), partial (15%) [THC2615552]	chr2:095877948-095878007	hs|2q11.1	Agilent_HUMAN_G3V2	THC2615552	chr2	95877948	95878007	+
LNCA_21_P0000787	0.0147663	2.52194	mRNA	NR_038402	NR_038402	NR_038402	NA	Hs.368516	LOC100507387	uncharacterized LOC100507387	ENST00000506011	THC2546582	NA	Homo sapiens uncharacterized LOC100507387 (LOC100507387), non-coding RNA [NR_038402]	chr5:175551037-175551096	hs|5q35.2	Agilent_HUMAN_G3V2	NR_038402	chr5	175551037	175551096	+
LNCA_23_P308136	0.0307765	2.51887	mRNA	NM_178125	NM_178125	NM_178125	135892	Hs.647053	TRIM50	tripartite motif containing 50	ENST00000453152	THC2508398	GO:0005622|GO:0005737|GO:0016874|GO:0008270|GO:0046872|GO:0043231	Homo sapiens tripartite motif containing 50 (TRIM50), mRNA [NM_178125]	chr7:72734187-72733034	hs|7q11.23	Agilent_HUMAN_G3V2	NM_178125	chr7	72733034	72734187	-
LNCA_23_P412214	0.00460772	2.51654	mRNA	NM_015085	NM_015085	NM_015085	23108	Hs.499659	RAP1GAP2	RAP1 GTPase activating protein 2	ENST00000254695	THC2680829	GO:0005622|GO:0051056|GO:0048471|GO:0005813|GO:0005737|GO:0005829|GO:0005096	Homo sapiens RAP1 GTPase activating protein 2 (RAP1GAP2), transcript variant 1, mRNA [NM_015085]	chr17:2940136-2940195	hs|17p13.3	Agilent_HUMAN_G3V2	NM_015085	chr17	2940136	2940195	+
LNCA_23_P431505	0.0106982	2.51028	mRNA	AB073660	NA	AB073660	286046	Hs.657083	XKR6	XK, Kell blood group complex subunit-related family, member 6	ENST00000530248	THC2476883	GO:0016020|GO:0016021	Homo sapiens primary neuroblastoma cDNA, clone:Nbla00437, full insert sequence. [AB073660]	chr8:10965890-10965831	hs|8p23.1	Agilent_HUMAN_G3V2	AB073660	chr8	10965831	10965890	-
LNCA_33_P3233754	0.0128539	2.50937	mRNA	NM_001085384	NM_001085384	NM_001085384	7710	Hs.646378	ZNF154	zinc finger protein 154	ENST00000426889	THC2758984	GO:0005622|GO:0006355|GO:0003700|GO:0008270|GO:0005634|GO:0003677|GO:0046872	Homo sapiens zinc finger protein 154 (ZNF154), mRNA [NM_001085384]	chr19:58211870-58211811	hs|19q13.43	Agilent_HUMAN_G3V2	NM_001085384	chr19	58211811	58211870	-
LNCA_19_P00318768	0.0186773	2.49337	mRNA	NR_038988	NR_038988	NR_038988	NA	Hs.729408	LOC100287765	NA	NA	THC2499985	NA	Homo sapiens uncharacterized LOC100287765 (LOC100287765), non-coding RNA [NR_038988]	chrX:102139284-102139343	hs|Xq22.1	Agilent_HUMAN_G3V2	NR_038988	chrX	102139284	102139343	+
LNCA_23_P142872	0.0314555	2.48856	mRNA	NM_031283	NM_031283	NM_031283	83439	Hs.516297	TCF7L1	transcription factor 7-like 1 (T-cell specific, HMG-box)	ENST00000282111	THC2463852	GO:0046022|GO:0003700|GO:0008013|GO:0030111|GO:0044212|GO:0006325|GO:0048699|GO:0005634|GO:0016055|GO:0008595|GO:0035019|GO:0060070|GO:0022008|GO:0048319|GO:0005667|GO:0006355|GO:0006357|GO:0003677|GO:2000036|GO:0043565|GO:0048863|GO:0007420|GO:0003682|GO:0043588|GO:0045892	Homo sapiens transcription factor 7-like 1 (T-cell specific, HMG-box) (TCF7L1), mRNA [NM_031283]	chr2:85536678-85536737	hs|2p11.2	Agilent_HUMAN_G3V2	NM_031283	chr2	85536678	85536737	+
LNCA_33_P3358049	0.0482958	2.48176	mRNA	NM_001129820	NM_001129820	NM_001129820	342618	Hs.591193	SLFN14	schlafen family member 14	ENST00000415846	NA	GO:0000166|GO:0005524	Homo sapiens schlafen family member 14 (SLFN14), mRNA [NM_001129820]	chr17:33875203-33875144	hs|17q12	Agilent_HUMAN_G3V2	NM_001129820	chr17	33875144	33875203	-
LNCA_21_P0006566	0.0440661	2.47616	mRNA	THC2649084	NA	NA	NA	NA	XLOC_008033	NA	NA	THC2649084	NA	ALU1_HUMAN (P39188) Alu subfamily J sequence contamination warning entry, partial (12%) [THC2649084]	chrX:102219220-102219279	hs|Xq22.1	Agilent_HUMAN_G3V2	THC2649084	chrX	102219220	102219279	+
LNCA_33_P3382229	0.00448613	2.47532	mRNA	NM_006757	NM_006757	NM_006757	7140	Hs.73454	TNNT3	troponin T type 3 (skeletal, fast)	ENST00000381561	THC2613386	GO:0030172|GO:0031013|GO:0030049|GO:0005861|GO:0003009|GO:0043462|GO:0006942|GO:0003779|GO:0030899|GO:0005523|GO:0048306|GO:0005829	Homo sapiens troponin T type 3 (skeletal, fast) (TNNT3), transcript variant 1, mRNA [NM_006757]	chr11:1955825-1955884	hs|11p15.5	Agilent_HUMAN_G3V2	NM_006757	chr11	1955825	1955884	+
LNCA_23_P425967	0.00222555	2.47347	mRNA	NM_175064	NM_175064	NM_175064	285955	Hs.645483	SPDYE1	speedy homolog E1 (Xenopus laevis)	ENST00000258704	THC2473061	NA	Homo sapiens speedy homolog E1 (Xenopus laevis) (SPDYE1), mRNA [NM_175064]	chr7:44048921-44048980	hs|7p13	Agilent_HUMAN_G3V2	NM_175064	chr7	44048921	44048980	+
LNCA_33_P3261468	0.00468058	2.47334	mRNA	NM_001195790	NM_001195790	NM_001195790	100506736	Hs.447559	SLFN12L	schlafen family member 12-like	ENST00000449046	THC2520708	GO:0016020|GO:0016021|GO:0005524	Homo sapiens schlafen family member 12-like (SLFN12L), mRNA [NM_001195790]	chr17:33802070-33802011	hs|17q12	Agilent_HUMAN_G3V2	NM_001195790	chr17	33802011	33802070	-
LNCA_33_P3329433	0.0380294	2.47147	mRNA	ENST00000392423	NA	AF321609	7273	Hs.134602	TTN	titin	ENST00000392423	THC2493086	GO:0045859|GO:0005515|GO:0030240|GO:0005516|GO:0007076|GO:0030018|GO:0006941|GO:0005634|GO:0043621|GO:0042802|GO:0005829|GO:0005737|GO:0051015|GO:0006936|GO:0000166|GO:0055003|GO:0008307|GO:0048769|GO:0055008|GO:0000794|GO:0030049|GO:0005509|GO:0045214|GO:0031433|GO:0030168|GO:0005576|GO:0003676|GO:0031430|GO:0005524|GO:0051592|GO:0051371|GO:0048739|GO:0050790|GO:0051393|GO:0004674|GO:0007596|GO:…	titin [Source:HGNC Symbol;Acc:12403] [ENST00000392423]	chr2:179526735-179526676	hs|2q31.2	Agilent_HUMAN_G3V2	ENST00000392423	chr2	179526676	179526735	-
LNCA_33_P3389298	0.0473786	2.46769	mRNA	NM_001099438	NM_001099438	NM_001099438	90075	Hs.657402	ZNF30	zinc finger protein 30	ENST00000342559	THC2475403	GO:0005622|GO:0006355|GO:0008270|GO:0005634|GO:0003677|GO:0046872	Homo sapiens zinc finger protein 30 (ZNF30), transcript variant 1, mRNA [NM_001099438]	chr19:35435506-35435565	hs|19q13.11	Agilent_HUMAN_G3V2	NM_001099438	chr19	35435506	35435565	+
LNCA_33_P3379492	0.0128916	2.46347	mRNA	AK092544	NA	AK092544	100131581	Hs.638992	LOC100131581	uncharacterized LOC100131581	NA	THC2478143	NA	Homo sapiens cDNA FLJ35225 fis, clone PROST2001116. [AK092544]	chr8:12436689-12436748	hs|8p23.1	Agilent_HUMAN_G3V2	AK092544	chr8	12436689	12436748	+
LNCA_33_P3375413	0.0421561	2.45896	mRNA	AK128441	NA	AK128441	100131719	Hs.633928	LOC100131719	uncharacterized LOC100131719	NA	THC2482907	NA	Homo sapiens cDNA FLJ46584 fis, clone THYMU3043688. [AK128441]	chr10:124950274-124950333	hs|10q26.13	Agilent_HUMAN_G3V2	AK128441	chr10	124950274	124950333	+
LNCA_32_P114028	0.0412287	2.45581	mRNA	NM_024688	NM_024688	NM_024688	79741	Hs.585464	C10orf68	chromosome 10 open reading frame 68	ENST00000375037	THC2479642	NA	Homo sapiens chromosome 10 open reading frame 68 (C10orf68), mRNA [NM_024688]	chr10:33165295-33165354	hs|10p11.22	Agilent_HUMAN_G3V2	NM_024688	chr10	33165295	33165354	+
LNCA_21_P0013389	0.000619048	2.45383	mRNA	NR_028058	NR_028058	NR_028058	NA	Hs.634244	LOC100132832	PMS2 postmeiotic segregation increased 2 (S. cerevisiae) pseudogene	NA	THC2507172	NA	Homo sapiens PMS2 postmeiotic segregation increased 2 (S. cerevisiae) pseudogene (LOC100132832), non-coding RNA [NR_028058]	chr7:76681974-76682033	hs|7q11.23	Agilent_HUMAN_G3V2	NR_028058	chr7	76681974	76682033	+
LNCA_21_P0011935	0.00775667	2.45285	mRNA	ENST00000431244	NA	NA	NA	NA	XLOC_l2_008140	NA	ENST00000431244	THC2523793	NA	Q9DC07_MOUSE (Q9DC07) Adult male lung cDNA, RIKEN full-length enriched library, clone:1200007O21 product:LIM AND SH3 PROTEIN (LASP Homolog), full insert sequence (Nebulette), partial (11%) [THC2523793]	chr2:98088292-98088233	hs|2q11.2	Agilent_HUMAN_G3V2	ENST00000431244	chr2	98088233	98088292	-
LNCA_21_P0000807	0.0274828	2.45002	mRNA	NR_038447	NR_038447	NR_038447	NA	NA	LOC100130231	uncharacterized LOC100130231	NA	THC2629044	NA	Homo sapiens uncharacterized LOC100130231 (LOC100130231), transcript variant 2, non-coding RNA [NR_038447]	chr8:126948521-126934770	hs|8q24.13	Agilent_HUMAN_G3V2	NR_038447	chr8	126934770	126948521	-
LNCA_33_P3333777	0.0204068	2.44516	mRNA	NR_024490	NR_024490	NR_024490	100129387	Hs.720669	LOC100129387	uncharacterized LOC100129387	NA	THC2496379	NA	Homo sapiens uncharacterized LOC100129387 (LOC100129387), non-coding RNA [NR_024490]	chr15:50650157-50650216	hs|15q21.2	Agilent_HUMAN_G3V2	NR_024490	chr15	50650157	50650216	+
LNCA_24_P926507	0.0109253	2.44224	mRNA	NM_001146037	NM_001146037	NM_001146037	6563	Hs.101307	SLC14A1	solute carrier family 14 (urea transporter), member 1 (Kidd blood group)	ENST00000436407	THC2515572	GO:0005886|GO:0005887|GO:0005372|GO:0015204|GO:0071918|GO:0055085|GO:0015840	Homo sapiens solute carrier family 14 (urea transporter), member 1 (Kidd blood group) (SLC14A1), transcript variant 4, mRNA [NM_001146037]	chr18:43331926-43331985	hs|18q12.3	Agilent_HUMAN_G3V2	NM_001146037	chr18	43331926	43331985	+
LNCA_23_P126486	0.0037746	2.44044	mRNA	NR_026752	NR_026752	NR_026752	84809	Hs.631865	CROCCP2	ciliary rootlet coiled-coil, rootletin pseudogene 2	NA	THC2503186	NA	Homo sapiens ciliary rootlet coiled-coil, rootletin pseudogene 2 (CROCCP2), non-coding RNA [NR_026752]	chr1:16944885-16944826	hs|1p36.13	Agilent_HUMAN_G3V2	NR_026752	chr1	16944826	16944885	-
LNCA_33_P3265479	0.0275674	2.43521	mRNA	ENST00000522974	NA	AB167741	57623	NA	ZFAT	zinc finger and AT hook domain containing	ENST00000522974	NA	GO:0005622|GO:0006355|GO:0005737|GO:0008270|GO:0005634|GO:0003677|GO:0046872|GO:0005829	zinc finger and AT hook domain containing [Source:HGNC Symbol;Acc:19899] [ENST00000522974]	chr8:135609851-135609792	hs|8q24.22	Agilent_HUMAN_G3V2	ENST00000522974	chr8	135609792	135609851	-
LNCA_24_P247978	8.65157e-05	2.43507	mRNA	NM_016089	NM_016089	NM_016089	51385	Hs.172602	ZNF589	zinc finger protein 589	ENST00000354698	THC2470407	GO:0005622|GO:0006355|GO:0008270|GO:0005634|GO:0003677|GO:0046872	Homo sapiens zinc finger protein 589 (ZNF589), mRNA [NM_016089]	chr3:48311766-48311825	hs|3p21.31	Agilent_HUMAN_G3V2	NM_016089	chr3	48311766	48311825	+
LNCA_33_P3233165	0.0317981	2.43204	mRNA	AK309764	NA	AK309764	112942	Hs.264208	CCDC104	coiled-coil domain containing 104	ENST00000406691	NA	NA	Homo sapiens cDNA, FLJ99805. [AK309764]	chr2:55766620-55766679	hs|2p16.1	Agilent_HUMAN_G3V2	AK309764	chr2	55766620	55766679	+
LNCA_19_P00322573	0.0263196	2.4316	mRNA	ENST00000430244	NA	BC017910	NA	NA	Q9UJ41	NA	ENST00000430244	THC2529368	NA	RABX5_HUMAN (Q9UJ41) Rab5 GDP/GTP exchange factor (Rabaptin 5-associated exchange factor for Rab5) (Rabex-5), partial (8%) [THC2529368]	chr7:66804907-66804966	hs|7q11.21	Agilent_HUMAN_G3V2	ENST00000430244	chr7	66804907	66804966	+
LNCA_21_P0011267	0.0359234	2.42606	mRNA	NR_039982	NR_039982	NR_039982	NA	Hs.675941	LOC283547	uncharacterized LOC283547	ENST00000554732	THC2503396	NA	Homo sapiens uncharacterized LOC283547 (LOC283547), non-coding RNA [NR_039982]	chr14:39304815-39304756	hs|14q21.1	Agilent_HUMAN_G3V2	NR_039982	chr14	39304756	39304815	-
LNCA_33_P3321034	0.0253785	2.42455	mRNA	NM_020911	NM_020911	NM_020911	91584	Hs.511454	PLXNA4	plexin A4	ENST00000496550	THC2613333	GO:0021960|GO:0005886|GO:0007275|GO:0021644|GO:0048485|GO:0007399|GO:0002116|GO:0005622|GO:0021793|GO:0021784|GO:0007165|GO:0050923|GO:0021615|GO:0048841|GO:0007411|GO:0048812|GO:0021636|GO:0071526|GO:0004872|GO:0016021|GO:0021610	Homo sapiens plexin A4 (PLXNA4), transcript variant 1, mRNA [NM_020911]	chr7:131825547-131825488	hs|7q32.3	Agilent_HUMAN_G3V2	NM_020911	chr7	131825488	131825547	-
LNCA_33_P3685297	0.0179434	2.41835	mRNA	AJ276252	NA	AJ276252	NA	Hs.684572	NA	NA	NA	NP1167700	NA	Homo sapiens partial mRNA, clone c3-1a19. [AJ276252]	chr11:57514438-57514497	hs|11q12.1	Agilent_HUMAN_G3V2	AJ276252	chr11	57514438	57514497	+
LNCA_23_P157766	0.0479709	2.40981	mRNA	NM_001039395	NM_001039395	NM_001039395	55064	Hs.179615	C9orf68	chromosome 9 open reading frame 68	ENST00000381895	THC2682149	NA	Homo sapiens chromosome 9 open reading frame 68 (C9orf68), mRNA [NM_001039395]	chr9:4600757-4600698	hs|9p24.1	Agilent_HUMAN_G3V2	NM_001039395	chr9	4600698	4600757	-
LNCA_32_P361185	0.016251	2.4068	mRNA	NM_001024593	NM_001024593	NM_001024593	118490	Hs.631823	ZMYND17	zinc finger, MYND-type containing 17	ENST00000372912	NP805824	GO:0008270|GO:0046872	Homo sapiens zinc finger, MYND-type containing 17 (ZMYND17), mRNA [NM_001024593]	chr10:75184899-75184515	hs|10q22.2	Agilent_HUMAN_G3V2	NM_001024593	chr10	75184515	75184899	-
LNCA_33_P3336053	0.0345553	2.40492	mRNA	NM_178510	NM_178510	NM_178510	255239	Hs.448473	ANKK1	ankyrin repeat and kinase domain containing 1	ENST00000303941	THC2488697	GO:0000166|GO:0004674|GO:0005524	Homo sapiens ankyrin repeat and kinase domain containing 1 (ANKK1), mRNA [NM_178510]	chr11:113270930-113270989	hs|11q23.2	Agilent_HUMAN_G3V2	NM_178510	chr11	113270930	113270989	+
LNCA_33_P3218410	0.0366911	2.40083	mRNA	ENST00000389511	NA	BC007023	472	Hs.367437	ATM	ataxia telangiectasia mutated	ENST00000389511	NA	GO:0005515|GO:0008219|GO:0002331|GO:0001756|GO:0004677|GO:0032403|GO:0007507|GO:0043525|GO:0046777|GO:0000166|GO:0018105|GO:0016303|GO:0046983|GO:0007131|GO:0006977|GO:0000781|GO:0005819|GO:0030889|GO:0035174|GO:0006281|GO:0007420|GO:0071044|GO:0000075|GO:0005654|GO:0090399|GO:0042159|GO:0007094|GO:0031572|GO:0005634|GO:0071480|GO:0006302|GO:0005737|GO:0000724|GO:0010212|GO:0051726|GO:0007050|GO:…	ataxia telangiectasia mutated [Source:HGNC Symbol;Acc:795] [ENST00000389511]	chr11:108166338-108166397	hs|11q22.3	Agilent_HUMAN_G3V2	ENST00000389511	chr11	108166338	108166397	+
LNCA_33_P3436646	0.0369084	2.39915	mRNA	AK091114	NA	AK091114	151657	Hs.587187	LOC151657	uncharacterized LOC151657	NA	THC2604842	NA	Homo sapiens cDNA FLJ33795 fis, clone CTONG1000097. [AK091114]	chr3:107752757-107752698	hs|3q13.12	Agilent_HUMAN_G3V2	AK091114	chr3	107752698	107752757	-
LNCA_33_P3542801	0.0168447	2.39858	mRNA	BC048978	NA	BC048978	729291	Hs.129278	LOC729291	uncharacterized LOC729291	NA	THC2520008	NA	Homo sapiens cDNA clone IMAGE:4830713. [BC048978]	chr12:28341327-28341268	hs|12p11.22	Agilent_HUMAN_G3V2	BC048978	chr12	28341268	28341327	-
LNCA_23_P7361	0.0208984	2.3944	mRNA	NM_024090	NM_024090	NM_024090	79071	Hs.412939	ELOVL6	ELOVL fatty acid elongase 6	ENST00000394607	THC2462213	GO:0005515|GO:0016747|GO:0005783|GO:0019367|GO:0030176|GO:0035338|GO:0009922|GO:0016020|GO:0042759|GO:0005789|GO:0019432|GO:0034625|GO:0016021|GO:0044255|GO:0016740	Homo sapiens ELOVL fatty acid elongase 6 (ELOVL6), transcript variant 1, mRNA [NM_024090]	chr4:110971230-110971171	hs|4q25	Agilent_HUMAN_G3V2	NM_024090	chr4	110971171	110971230	-
LNCA_33_P3384695	0.0177167	2.38812	mRNA	AB209015	NA	AB209015	83988	NA	NCALD	neurocalcin delta	NA	NP1473679	GO:0005622|GO:0015631|GO:0030276|GO:0005509|GO:0007268|GO:0030130|GO:0003779|GO:0016192|GO:0005829	Homo sapiens mRNA for Neurocalcin delta variant protein. [AB209015]	chr8:102704768-102704709	hs|8q22.3	Agilent_HUMAN_G3V2	AB209015	chr8	102704709	102704768	-
LNCA_33_P3264224	0.0412097	2.38655	mRNA	NM_017525	NM_017525	NM_017525	55561	Hs.293590	CDC42BPG	CDC42 binding protein kinase gamma (DMPK-like)	ENST00000342711	THC2567453	GO:0035556|GO:0005813|GO:0005737|GO:0005083|GO:0000287|GO:0031532|GO:0000166|GO:0004674|GO:0006468|GO:0031252|GO:0005524	Homo sapiens CDC42 binding protein kinase gamma (DMPK-like) (CDC42BPG), mRNA [NM_017525]	chr11:64591891-64591832	hs|11q13.1	Agilent_HUMAN_G3V2	NM_017525	chr11	64591832	64591891	-
LNCA_32_P142128	0.0426216	2.38087	mRNA	NR_026566	NR_026566	NR_026566	728053	Hs.652450	BMS1P1	BMS1 pseudogene 1	ENST00000445221	THC2552487	NA	Homo sapiens BMS1 pseudogene 1 (BMS1P1), non-coding RNA [NR_026566]	chr10:46737617-46737612	hs|10q11.22	Agilent_HUMAN_G3V2	NR_026566	chr10	46737612	46737617	-
LNCA_23_P20392	0.0241016	2.37568	mRNA	NM_015310	NM_015310	NM_015310	23362	Hs.434255	PSD3	pleckstrin and Sec7 domain containing 3	ENST00000440756	THC2463015	GO:0005622|GO:0005086|GO:0005737|GO:0030054|GO:0005886|GO:0045211|GO:0045202|GO:0032012|GO:0014069	Homo sapiens pleckstrin and Sec7 domain containing 3 (PSD3), transcript variant 1, mRNA [NM_015310]	chr8:18385112-18385053	hs|8p22	Agilent_HUMAN_G3V2	NM_015310	chr8	18385053	18385112	-
LNCA_32_P797019	0.0419942	2.36622	mRNA	ENST00000532531	XM_003403482	XM_003403482	79716	Hs.554211	NPEPL1	aminopeptidase-like 1	ENST00000532531	THC2705581	GO:0005622|GO:0005737|GO:0030145|GO:0004177|GO:0008235|GO:0006508|GO:0008233|GO:0046872	aminopeptidase-like 1 [Source:HGNC Symbol;Acc:16244] [ENST00000532531]	chr20:57294162-57294221	hs|20q13.32	Agilent_HUMAN_G3V2	ENST00000532531	chr20	57294162	57294221	+
LNCA_24_P316234	0.0293797	2.36157	mRNA	AK090485	NA	AK090485	NA	Hs.675960	NA	NA	NA	THC2640379	NA	Homo sapiens mRNA for FLJ00409 protein. [AK090485]	chr10:22843154-22843095	hs|10p12.2	Agilent_HUMAN_G3V2	AK090485	chr10	22843095	22843154	-
LNCA_23_P347468	0.0336465	2.36132	mRNA	NM_017412	NM_017412	NM_017412	7976	Hs.40735	FZD3	frizzled family receptor 3	ENST00000240093	THC2477676	GO:0008406|GO:0005515|GO:0001736|GO:0017147|GO:0030424|GO:0005886|GO:0071679|GO:0007199|GO:0030425|GO:0005737|GO:0033278|GO:0030182|GO:0043025|GO:0004872|GO:0004871|GO:0060070|GO:0001944|GO:0042813|GO:0048786|GO:0042472|GO:0004930|GO:0001843|GO:0045177|GO:0007275|GO:0030165|GO:0032589|GO:0021754|GO:0016021	Homo sapiens frizzled family receptor 3 (FZD3), transcript variant 1, mRNA [NM_017412]	chr8:28421786-28421845	hs|8p21.1	Agilent_HUMAN_G3V2	NM_017412	chr8	28421786	28421845	+
LNCA_24_P135427	0.00458978	2.35839	mRNA	NR_036508	NR_036508	NR_036508	100128398	Hs.655081	LOC100128398	uncharacterized LOC100128398	ENST00000313957	THC2494088	NA	Homo sapiens uncharacterized LOC100128398 (LOC100128398), non-coding RNA [NR_036508]	chr19:58517508-58517567	hs|19q13.43	Agilent_HUMAN_G3V2	NR_036508	chr19	58517508	58517567	+
LNCA_24_P218006	0.0373475	2.35744	mRNA	NM_032317	NM_032317	NM_032317	84277	Hs.647046	DNAJC30	DnaJ (Hsp40) homolog, subfamily C, member 30	NA	THC2463096	GO:0005739|GO:0006457|GO:0031072|GO:0051082	Homo sapiens DnaJ (Hsp40) homolog, subfamily C, member 30 (DNAJC30), mRNA [NM_032317]	chr7:73095367-73095308	hs|7q11.23	Agilent_HUMAN_G3V2	NM_032317	chr7	73095308	73095367	-
LNCA_23_P215435	0.0164578	2.35171	mRNA	ENST00000395270	NA	AB014518	9883	NA	POM121	POM121 membrane glycoprotein	ENST00000395270	THC2580856	GO:0031965|GO:0005783|GO:0005975|GO:0005634|GO:0005635|GO:0015031|GO:0055085|GO:0010827|GO:0008645|GO:0015758|GO:0016020|GO:0005643|GO:0005789|GO:0016032|GO:0051028|GO:0016021	POM121 membrane glycoprotein [Source:HGNC Symbol;Acc:19702] [ENST00000395270]	chr7:72421126-72421185	hs|7q11.23	Agilent_HUMAN_G3V2	ENST00000395270	chr7	72421126	72421185	+
LNCA_21_P0013549	0.010165	2.35105	mRNA	ENST00000427722	NA	AK126819	NA	Hs.122828	XLOC_l2_014694	NA	ENST00000427722	THC2485354	NA	BX118352 Soares_testis_NHT Homo sapiens cDNA clone IMAGp998L221795, mRNA sequence [BX118352]	chr9:3674579-3674638	hs|9p24.2	Agilent_HUMAN_G3V2	ENST00000427722	chr9	3674579	3674638	+
LNCA_23_P88817	0.034087	2.34732	mRNA	NM_012213	NM_012213	NM_012213	23417	Hs.644610	MLYCD	malonyl-CoA decarboxylase	ENST00000262430	THC2713666	GO:0006637|GO:0031998|GO:0050080|GO:0006085|GO:0006084|GO:0016829|GO:0005829|GO:0005739|GO:0005737|GO:0006631|GO:0004492|GO:0006633|GO:0005777	Homo sapiens malonyl-CoA decarboxylase (MLYCD), nuclear gene encoding mitochondrial protein, mRNA [NM_012213]	chr16:83948633-83948692	hs|16q23.3	Agilent_HUMAN_G3V2	NM_012213	chr16	83948633	83948692	+
LNCA_21_P0000121	0.0398721	2.34417	mRNA	NM_001195076	NM_001195076	NM_001195076	NA	Hs.531650	C19orf81	chromosome 19 open reading frame 81	ENST00000490451	NA	NA	Homo sapiens chromosome 19 open reading frame 81 (C19orf81), mRNA [NM_001195076]	chr19:51162508-51162567	hs|19q13.33	Agilent_HUMAN_G3V2	NM_001195076	chr19	51162508	51162567	+
LNCA_33_P3308874	0.0363732	2.33972	mRNA	ENST00000465374	NA	NA	5279	NA	PIGC	phosphatidylinositol glycan anchor biosynthesis, class C	ENST00000465374	NA	GO:0006501|GO:0005783|GO:0016757|GO:0016254|GO:0003824|GO:0000506|GO:0017176|GO:0016020|GO:0005789|GO:0016021|GO:0044267|GO:0006506|GO:0043687	phosphatidylinositol glycan anchor biosynthesis, class C [Source:HGNC Symbol;Acc:8960] [ENST00000465374]	chr1:172345449-172345390	hs|1q24.3	Agilent_HUMAN_G3V2	ENST00000465374	chr1	172345390	172345449	-
LNCA_33_P3283984	0.0058928	2.33929	mRNA	NR_003228	NR_003228	NR_003228	172	Hs.534773	AFG3L1P	AFG3 ATPase family gene 3-like 1 (S. cerevisiae), pseudogene	ENST00000388970	NP1166591	NA	Homo sapiens AFG3 ATPase family gene 3-like 1 (S. cerevisiae), pseudogene (AFG3L1P), transcript variant 3, non-coding RNA [NR_003228]	chr16:90055299-90055358	hs|16q24.3	Agilent_HUMAN_G3V2	NR_003228	chr16	90055299	90055358	+
LNCA_21_P0013779	0.039612	2.33487	mRNA	ENST00000455331	NA	AK292543	NA	NA	XLOC_l2_015578	NA	ENST00000455331	THC2628362	NA	BC032236 armadillo repeat containing, X-linked 4 {Homo sapiens} (exp=-1; wgp=0; cg=0), partial (17%) [THC2628362]	chrX:100742643-100743054	hs|Xq22.1	Agilent_HUMAN_G3V2	ENST00000455331	chrX	100742643	100743054	+
LNCA_24_P592012	0.0409604	2.33401	mRNA	NM_025224	NM_025224	NM_025224	140685	Hs.585028	ZBTB46	zinc finger and BTB domain containing 46	ENST00000245663	THC2627797	GO:0005622|GO:0006355|GO:0008270|GO:0005634|GO:0003676|GO:0046872	Homo sapiens zinc finger and BTB domain containing 46 (ZBTB46), mRNA [NM_025224]	chr20:62375280-62375221	hs|20q13.33	Agilent_HUMAN_G3V2	NM_025224	chr20	62375221	62375280	-
LNCA_21_P0011893	0.042115	2.33378	mRNA	ENST00000426962	NA	AK097934	NA	Hs.633996	XLOC_l2_007834	NA	ENST00000426962	THC2651711	NA	Q9SI74_ARATH (Q9SI74) F23N19.12, partial (5%) [THC2651711]	chr2:242913548-242913607	hs|2q37.3	Agilent_HUMAN_G3V2	ENST00000426962	chr2	242913548	242913607	+
LNCA_33_P3431595	0.0322476	2.33129	mRNA	NM_173687	NM_173687	NM_173687	286122	Hs.660382	C8orf31	chromosome 8 open reading frame 31	ENST00000524181	THC2485658	NA	Homo sapiens chromosome 8 open reading frame 31 (C8orf31), mRNA [NM_173687]	chr8:144134801-144134860	hs|8q24.3	Agilent_HUMAN_G3V2	NM_173687	chr8	144134801	144134860	+
LNCA_23_P141092	0.0452884	2.32832	mRNA	NM_003223	NM_003223	NM_003223	7023	Hs.513305	TFAP4	transcription factor AP-4 (activating enhancer binding protein 4)	ENST00000204517	THC2770291	GO:0005515|GO:0071157|GO:0008285|GO:0042826|GO:0044212|GO:0003705|GO:0045736|GO:0005634|GO:0042803|GO:0017053|GO:0007090|GO:0006978|GO:0043066|GO:0043065|GO:0046982|GO:0003713|GO:0070888|GO:0003677|GO:0043923|GO:0043392|GO:0043922|GO:0043565|GO:0006461|GO:0045893|GO:0045892|GO:0071549	Homo sapiens transcription factor AP-4 (activating enhancer binding protein 4) (TFAP4), mRNA [NM_003223]	chr16:4307948-4307889	hs|16p13.3	Agilent_HUMAN_G3V2	NM_003223	chr16	4307889	4307948	-
LNCA_19_P00320295	0.0287133	2.3271	mRNA	NR_023915	NR_023915	NR_023915	NA	NA	IPW	imprinted in Prader-Willi syndrome (non-protein coding)	ENST00000553149	NP1166275	NA	Homo sapiens imprinted in Prader-Willi syndrome (non-protein coding) (IPW), non-coding RNA [NR_023915]	chr15:25363435-25363494	hs|15q11.2	Agilent_HUMAN_G3V2	NR_023915	chr15	25363435	25363494	+
LNCA_23_P320290	0.0130124	2.32435	mRNA	NM_178835	NM_178835	NM_178835	152485	Hs.133916	ZNF827	zinc finger protein 827	ENST00000440280	THC2757137	GO:0005622|GO:0006355|GO:0008270|GO:0005634|GO:0003677|GO:0046872	Homo sapiens zinc finger protein 827 (ZNF827), mRNA [NM_178835]	chr4:146686313-146686254	hs|4q31.21	Agilent_HUMAN_G3V2	NM_178835	chr4	146686254	146686313	-
LNCA_24_P3804	0.0101273	2.32165	mRNA	NM_001039651	NM_001039651	NM_001039651	401251	Hs.371225	C6orf26	chromosome 6 open reading frame 26	ENST00000534153	THC2525626	NA	Homo sapiens chromosome 6 open reading frame 26 (C6orf26), mRNA [NM_001039651]	chr6:31732391-31732450	hs|6p21.33	Agilent_HUMAN_G3V2	NM_001039651	chr6	31732391	31732450	+
LNCA_33_P3253596	0.0187017	2.32155	mRNA	NM_012310	NM_012310	NM_012310	24137	Hs.648326	KIF4A	kinesin family member 4A	ENST00000374388	THC2786439	GO:0006996|GO:0005694|GO:0005730|GO:0030496|GO:0005634|GO:0003777|GO:0003677|GO:0005524|GO:0016363|GO:0005829|GO:0005737|GO:0000166|GO:0007596|GO:0007411|GO:0005876|GO:0008089|GO:0005856|GO:0007018	Homo sapiens kinesin family member 4A (KIF4A), mRNA [NM_012310]	chrX:69626140-69626199	hs|Xq13.1	Agilent_HUMAN_G3V2	NM_012310	chrX	69626140	69626199	+
LNCA_24_P945059	0.0387833	2.32144	mRNA	NM_025107	NM_025107	NM_025107	80177	Hs.18160	MYCT1	myc target 1	ENST00000367245	THC2660260	GO:0005634	Homo sapiens myc target 1 (MYCT1), mRNA [NM_025107]	chr6:153044993-153045052	hs|6q25.2	Agilent_HUMAN_G3V2	NM_025107	chr6	153044993	153045052	+
LNCA_33_P3264042	0.027229	2.31837	mRNA	NM_001144933	NM_001144933	NM_001144933	146779	Hs.152670	EFCAB3	EF-hand calcium binding domain 3	ENST00000493710	THC2485005	GO:0005509	Homo sapiens EF-hand calcium binding domain 3 (EFCAB3), transcript variant 1, mRNA [NM_001144933]	chr17:60493612-60493671	hs|17q23.2	Agilent_HUMAN_G3V2	NM_001144933	chr17	60493612	60493671	+
LNCA_21_P0012569	0.0410172	2.3132	mRNA	THC2568011	NA	NA	NA	NA	XLOC_l2_010568	NA	NA	THC2568011	NA	Q8NHC1_HUMAN (Q8NHC1) Seven transmembrane helix receptor, partial (42%) [THC2568011]	chr11:003620886-003620827	hs|11p15.4	Agilent_HUMAN_G3V2	THC2568011	chr11	3620827	3620886	-
LNCA_33_P3210583	0.00623004	2.31292	mRNA	NM_014911	NM_014911	NM_014911	22848	Hs.468878	AAK1	AP2 associated kinase 1	ENST00000409085	THC2684828	GO:0045747|GO:0005886|GO:0035612|GO:0030136|GO:0050821|GO:0005112|GO:0005524|GO:0006897|GO:0032880|GO:0005905|GO:0046777|GO:0000166|GO:0004674|GO:0043195|GO:2000369|GO:0006468|GO:0031252|GO:0019897	Homo sapiens AP2 associated kinase 1 (AAK1), mRNA [NM_014911]	chr2:69702987-69702928	hs|2p13.3	Agilent_HUMAN_G3V2	NM_014911	chr2	69702928	69702987	-
LNCA_23_P397543	0.00390272	2.30856	mRNA	NR_026873	NR_026873	NR_026873	285908	Hs.50755	LINC00174	long intergenic non-protein coding RNA 174	ENST00000421767	THC2491534	NA	Homo sapiens long intergenic non-protein coding RNA 174 (LINC00174), non-coding RNA [NR_026873]	chr7:65841248-65841189	hs|7q11.21	Agilent_HUMAN_G3V2	NR_026873	chr7	65841189	65841248	-
LNCA_21_P0010834	0.031375	2.30782	mRNA	NM_018181	NM_018181	NM_018181	NA	Hs.529023	ZNF532	zinc finger protein 532	ENST00000336078	NP1166598	GO:0005622|GO:0006355|GO:0008270|GO:0005634|GO:0003677|GO:0046872	Homo sapiens zinc finger protein 532 (ZNF532), mRNA [NM_018181]	chr18:56620985-56646299	hs|18q21.32	Agilent_HUMAN_G3V2	NM_018181	chr18	56620985	56646299	+
LNCA_33_P3314857	0.0351563	2.30599	mRNA	NM_002242	NM_002242	NM_002242	3769	Hs.467338	KCNJ13	potassium inwardly-rectifying channel, subfamily J, member 13	ENST00000410029	THC2673694	GO:0005242|GO:0005244|GO:0016020|GO:0008076|GO:0016021|GO:0006813|GO:0006811	Homo sapiens potassium inwardly-rectifying channel, subfamily J, member 13 (KCNJ13), transcript variant 1, mRNA [NM_002242]	chr2:233635677-233635618	hs|2q37.1	Agilent_HUMAN_G3V2	NM_002242	chr2	233635618	233635677	-
LNCA_33_P3323544	0.00347487	2.30582	mRNA	NA	NA	NA	NA	NA	NA	NA	NA	NA	NA	NA	chr8:028615245-028615186	hs|8p21.1	Agilent_HUMAN_G3V2	NA	chr8	28615186	28615245	-
LNCA_21_P0001132	0.00326676	2.30566	mRNA	ENST00000449958	NA	BU953908	NA	Hs.547262	XLOC_000837	NA	ENST00000449958	THC2638904	NA	AGENCOURT_10607577 NIH_MGC_126 Homo sapiens cDNA clone IMAGE:6725222 5', mRNA sequence [BU953908]	chr1:53832936-53832877	hs|1p32.3	Agilent_HUMAN_G3V2	ENST00000449958	chr1	53832877	53832936	-
LNCA_33_P3228375	0.0137571	2.30218	mRNA	NM_020750	NM_020750	NM_020750	57510	Hs.203206	XPO5	exportin 5	ENST00000372252	THC2649019	GO:0005737|GO:0000049|GO:0005488|GO:0003723|GO:0008565|GO:0006611|GO:0005730|GO:0005654|GO:0005634|GO:0031047|GO:0006886|GO:0005829	Homo sapiens exportin 5 (XPO5), mRNA [NM_020750]	chr6:43491457-43491398	hs|6p21.1	Agilent_HUMAN_G3V2	NM_020750	chr6	43491398	43491457	-
LNCA_23_P114626	0.0254603	2.30167	mRNA	NM_000488	NM_000488	NM_000488	462	Hs.75599	SERPINC1	serpin peptidase inhibitor, clade C (antithrombin), member 1	ENST00000351522	THC2462752	GO:0005515|GO:0005886|GO:0004867|GO:0007584|GO:0005576|GO:0002020|GO:0030414|GO:0005615|GO:0010951|GO:0030162|GO:0007596|GO:0050728|GO:0008201	Homo sapiens serpin peptidase inhibitor, clade C (antithrombin), member 1 (SERPINC1), mRNA [NM_000488]	chr1:173873103-173873044	hs|1q25.1	Agilent_HUMAN_G3V2	NM_000488	chr1	173873044	173873103	-
LNCA_32_P216872	0.00294153	2.30132	mRNA	BX647358	NA	BX647358	283970	Hs.513695	PDXDC2P	pyridoxal-dependent decarboxylase domain containing 2, pseudogene	NA	THC2505378	GO:0030170|GO:0016831|GO:0019752|GO:0016829	Homo sapiens mRNA; cDNA DKFZp686B0962 (from clone DKFZp686B0962). [BX647358]	chr16:70010702-70010643	hs|16q22.1	Agilent_HUMAN_G3V2	BX647358	chr16	70010643	70010702	-
LNCA_33_P3266993	0.0346781	2.29906	mRNA	AK130024	NA	AK130024	NA	Hs.663278	NA	NA	NA	THC2483463	NA	Homo sapiens cDNA FLJ26514 fis, clone KDN07578. [AK130024]	chr17:46221457-46221398	hs|17q21.32	Agilent_HUMAN_G3V2	AK130024	chr17	46221398	46221457	-
LNCA_21_P0011451	0.0141015	2.2983	mRNA	NR_040023	NR_040023	NR_040023	NA	Hs.647398	ERVK13-1	endogenous retrovirus group K13, member 1	NA	THC2609726	GO:0005886|GO:0005198|GO:0019031|GO:0016021|GO:0019012	Homo sapiens endogenous retrovirus group K13, member 1 (ERVK13-1), non-coding RNA [NR_040023]	chr16:2721673-2721614	hs|16p13.3	Agilent_HUMAN_G3V2	NR_040023	chr16	2721614	2721673	-
LNCA_33_P3224916	0.00502079	2.29386	mRNA	NA	NA	NA	NA	NA	NA	NA	NA	NA	NA	NA	chr7:129246956-129246897	hs|7q32.2	Agilent_HUMAN_G3V2	NA	chr7	129246897	129246956	-
LNCA_19_P00808602	0.0242325	2.29283	mRNA	NR_026961	NR_026961	NR_026961	NA	NA	LOC284837	uncharacterized LOC284837	ENST00000400385	THC2620307	NA	Homo sapiens uncharacterized LOC284837 (LOC284837), non-coding RNA [NR_026961]	chr21:45228832-45228773	hs|21q22.3	Agilent_HUMAN_G3V2	NR_026961	chr21	45228773	45228832	-
LNCA_33_P3348194	0.0482778	2.29233	mRNA	NA	NA	NA	NA	NA	NA	NA	NA	NA	NA	NA	chr6:082897078-082897019	hs|6q14.1	Agilent_HUMAN_G3V2	NA	chr6	82897019	82897078	-
LNCA_19_P00322111	0.0315337	2.29157	mRNA	THC2564014	NA	NA	NA	NA	Q8RQM5	NA	NA	THC2564014	NA	LYSG_COREF (Q8RQM5) Lysine export transcriptional regulatory protein lysG, partial (7%) [THC2504219]	chrX:102156610-102156669	hs|Xq22.1	Agilent_HUMAN_G3V2	THC2564014	chrX	102156610	102156669	+
LNCA_32_P96719	0.0352872	2.28676	mRNA	NM_024745	NM_024745	NM_024745	79801	Hs.123253	SHCBP1	SHC SH2-domain binding protein 1	ENST00000303383	THC2464686	GO:0042169	Homo sapiens SHC SH2-domain binding protein 1 (SHCBP1), mRNA [NM_024745]	chr16:46615134-46615075	hs|16q11.2	Agilent_HUMAN_G3V2	NM_024745	chr16	46615075	46615134	-
LNCA_21_P0011405	0.0387165	2.28603	mRNA	NM_001164465	NM_001164465	NM_001164465	NA	Hs.723082	GOLGA6L10	golgin A6 family-like 10	ENST00000503347	THC2578162	NA	Homo sapiens golgin A6 family-like 10 (GOLGA6L10), mRNA [NM_001164465]	chr15:82638094-82637648	hs|15q25.2	Agilent_HUMAN_G3V2	NM_001164465	chr15	82637648	82638094	-
LNCA_24_P356	0.0178249	2.2808	mRNA	ENST00000406297	NA	AB028971	22848	NA	AAK1	AP2 associated kinase 1	ENST00000406297	THC2574997	GO:0045747|GO:0005886|GO:0035612|GO:0030136|GO:0050821|GO:0005112|GO:0005524|GO:0006897|GO:0032880|GO:0005905|GO:0046777|GO:0000166|GO:0004674|GO:0043195|GO:2000369|GO:0006468|GO:0031252|GO:0019897	AP2 associated kinase 1 [Source:HGNC Symbol;Acc:19679] [ENST00000406297]	chr2:69708481-69708422	hs|2p13.3	Agilent_HUMAN_G3V2	ENST00000406297	chr2	69708422	69708481	-
LNCA_33_P3387985	0.0263359	2.27823	mRNA	NR_015401	NR_015401	NR_015401	255031	Hs.661253	FLJ35390	uncharacterized LOC255031	NA	THC2510271	NA	Homo sapiens uncharacterized LOC255031 (FLJ35390), transcript variant 2, non-coding RNA [NR_015401]	chr7:44078835-44079718	hs|7p13	Agilent_HUMAN_G3V2	NR_015401	chr7	44078835	44079718	+
LNCA_23_P428298	0.0489453	2.27642	mRNA	NM_173561	NM_173561	NM_173561	222643	Hs.158357	UNC5CL	unc-5 homolog C (C. elegans)-like	ENST00000244565	THC2477820	GO:0007165|GO:0005737|GO:0016020|GO:0016021	Homo sapiens unc-5 homolog C (C. elegans)-like (UNC5CL), mRNA [NM_173561]	chr6:40994949-40994890	hs|6p21.1	Agilent_HUMAN_G3V2	NM_173561	chr6	40994890	40994949	-
LNCA_33_P3653912	0.0344809	2.27247	mRNA	ENST00000233379	NA	AK092980	51011	Hs.531247	FAHD2A	fumarylacetoacetate hydrolase domain containing 2A	ENST00000233379	THC2549702	GO:0016787|GO:0046872	fumarylacetoacetate hydrolase domain containing 2A [Source:HGNC Symbol;Acc:24252] [ENST00000233379]	chr2:96082070-96082129	hs|2q11.1	Agilent_HUMAN_G3V2	ENST00000233379	chr2	96082070	96082129	+
LNCA_33_P3415255	0.0454166	2.26767	mRNA	NM_020633	NM_020633	NM_020633	57191	Hs.677423	VN1R1	vomeronasal 1 receptor 1	ENST00000321039	THC2477983	GO:0008150|GO:0016503|GO:0016020|GO:0005886|GO:0004872|GO:0016021|GO:0004871|GO:0019236	Homo sapiens vomeronasal 1 receptor 1 (VN1R1), mRNA [NM_020633]	chr19:57966852-57966793	hs|19q13.43	Agilent_HUMAN_G3V2	NM_020633	chr19	57966793	57966852	-
LNCA_33_P3290577	0.035093	2.26245	mRNA	NM_032597	NM_032597	NM_032597	84689	Hs.709736	MS4A14	membrane-spanning 4-domains, subfamily A, member 14	ENST00000395001	NP1175661	GO:0016020|GO:0004872|GO:0016021	Homo sapiens membrane-spanning 4-domains, subfamily A, member 14 (MS4A14), transcript variant 1, mRNA [NM_032597]	chr11:60183684-60183743	hs|11q12.2	Agilent_HUMAN_G3V2	NM_032597	chr11	60183684	60183743	+
LNCA_33_P3276308	0.0266598	2.25969	mRNA	AK126112	NA	AK126112	641737	Hs.655030	FLJ44124	uncharacterized LOC641737	NA	THC2479560	NA	Homo sapiens cDNA FLJ44124 fis, clone THYMU2005321. [AK126112]	chr7:884043-884102	hs|7p22.3	Agilent_HUMAN_G3V2	AK126112	chr7	884043	884102	+
LNCA_23_P428640	0.0362621	2.25846	mRNA	NR_026862	NR_026862	NR_026862	90673	Hs.601513	PPP1R3E	protein phosphatase 1, regulatory subunit 3E	ENST00000452015	THC2536346	GO:0042587|GO:0005979|GO:0005975|GO:0005977|GO:0004721|GO:0005981	Homo sapiens protein phosphatase 1, regulatory subunit 3E (PPP1R3E), non-coding RNA [NR_026862]	chr14:23765366-23765307	hs|14q11.2	Agilent_HUMAN_G3V2	NR_026862	chr14	23765307	23765366	-
LNCA_23_P205293	0.016227	2.24701	mRNA	NM_018199	NM_018199	NM_018199	55218	Hs.533878	EXD2	exonuclease 3'-5' domain containing 2	ENST00000312994	THC2487468	GO:0005622|GO:0008408|GO:0006139|GO:0016787|GO:0003676	Homo sapiens exonuclease 3'-5' domain containing 2 (EXD2), transcript variant 5, mRNA [NM_018199]	chr14:69707963-69708022	hs|14q24.1	Agilent_HUMAN_G3V2	NM_018199	chr14	69707963	69708022	+
LNCA_23_P215341	0.0216809	2.24404	mRNA	NM_017946	NM_017946	NM_017946	55033	Hs.571333	FKBP14	FK506 binding protein 14, 22 kDa	ENST00000222803	THC2470620	GO:0000413|GO:0016020|GO:0006457|GO:0005783|GO:0018208|GO:0005509|GO:0003755|GO:0005788|GO:0005528|GO:0016853	Homo sapiens FK506 binding protein 14, 22 kDa (FKBP14), mRNA [NM_017946]	chr7:30053880-30053821	hs|7p14.3	Agilent_HUMAN_G3V2	NM_017946	chr7	30053821	30053880	-
LNCA_33_P3212769	0.0408142	2.24321	mRNA	BC020894	NA	BC020894	100132686	Hs.650455	LOC100132686	uncharacterized LOC100132686	NA	NA	NA	Homo sapiens hypothetical LOC100132686, mRNA (cDNA clone MGC:24147 IMAGE:4702473), complete cds. [BC020894]	chr11:112131565-112131624	hs|11q23.1	Agilent_HUMAN_G3V2	BC020894	chr11	112131565	112131624	+
LNCA_33_P3239839	0.0202799	2.24156	mRNA	NM_024963	NM_024963	NM_024963	80028	Hs.623974	FBXL18	F-box and leucine-rich repeat protein 18	ENST00000538679	THC2513387	NA	Homo sapiens F-box and leucine-rich repeat protein 18 (FBXL18), mRNA [NM_024963]	chr7:5515499-5515440	hs|7p22.1	Agilent_HUMAN_G3V2	NM_024963	chr7	5515440	5515499	-
LNCA_23_P319050	0.0461539	2.23811	mRNA	NM_145326	NM_145326	NM_145326	284443	Hs.656558	ZNF493	zinc finger protein 493	ENST00000339914	THC2485587	GO:0005622|GO:0006355|GO:0008270|GO:0005634|GO:0003677|GO:0046872	Homo sapiens zinc finger protein 493 (ZNF493), transcript variant 2, mRNA [NM_145326]	chr19:21591532-21591591	hs|19p12	Agilent_HUMAN_G3V2	NM_145326	chr19	21591532	21591591	+
LNCA_23_P164814	0.0305887	2.23595	mRNA	NM_024323	NM_024323	NM_024323	79173	Hs.143288	C19orf57	chromosome 19 open reading frame 57	ENST00000454313	THC2565803	GO:0005515|GO:0003674|GO:0007275|GO:0005575	Homo sapiens chromosome 19 open reading frame 57 (C19orf57), mRNA [NM_024323]	chr19:13993314-13993255	hs|19p13.13	Agilent_HUMAN_G3V2	NM_024323	chr19	13993255	13993314	-
LNCA_33_P3308914	0.0221183	2.23499	mRNA	NM_006383	NM_006383	NM_006383	10518	Hs.129867	CIB2	calcium and integrin binding family member 2	ENST00000539011	THC2580927	GO:0007229|GO:0005509	Homo sapiens calcium and integrin binding family member 2 (CIB2), mRNA [NM_006383]	chr15:78397052-78396993	hs|15q25.1	Agilent_HUMAN_G3V2	NM_006383	chr15	78396993	78397052	-
LNCA_33_P3294072	0.0254429	2.23423	mRNA	THC2677632	NA	NA	NA	NA	NA	NA	NA	THC2677632	NA	Q3KR39_HUMAN (Q3KR39) LOC125893 protein, partial (20%) [THC2677632]	chr19:053098817-053098876	hs|19q13.41	Agilent_HUMAN_G3V2	THC2677632	chr19	53098817	53098876	+
LNCA_33_P3388983	0.0220608	2.23357	mRNA	AK025221	NA	AK025221	441108	Hs.658288	C5orf56	chromosome 5 open reading frame 56	ENST00000378947	THC2602117	NA	Homo sapiens cDNA: FLJ21568 fis, clone COL06492. [AK025221]	chr5:131793054-131793113	hs|5q31.1	Agilent_HUMAN_G3V2	AK025221	chr5	131793054	131793113	+
LNCA_21_P0003588	0.00815224	2.23161	mRNA	ENST00000478425	NA	NA	NA	NA	STIM2	stromal interaction molecule 2	ENST00000478425	THC2615676	GO:0005515|GO:0032237|GO:0032235|GO:0005886|GO:0051928|GO:0005783|GO:0005246|GO:0005509|GO:0006874|GO:0005789|GO:0016021|GO:0006811	EBNA1_EBV (P03211) Epstein-Barr nuclear antigen 1 (EBV nuclear antigen 1) (EBNA-1), partial (6%) [THC2615676]	chr4:26860301-26860360	hs|4p15.2	Agilent_HUMAN_G3V2	ENST00000478425	chr4	26860301	26860360	+
LNCA_23_P364837	0.0365796	2.22924	mRNA	NM_015378	NM_015378	NM_015378	55187	Hs.439381	VPS13D	vacuolar protein sorting 13 homolog D (S. cerevisiae)	ENST00000358136	THC2525776	GO:0008104	Homo sapiens vacuolar protein sorting 13 homolog D (S. cerevisiae) (VPS13D), transcript variant 1, mRNA [NM_015378]	chr1:12571638-12571697	hs|1p36.22	Agilent_HUMAN_G3V2	NM_015378	chr1	12571638	12571697	+
LNCA_33_P3334121	0.0412709	2.22793	mRNA	NA	NA	NA	NA	NA	NA	NA	NA	NA	NA	NA	chr1:148339922-148339863	hs|1q21.2	Agilent_HUMAN_G3V2	NA	chr1	148339863	148339922	-
LNCA_24_P211797	0.00111538	2.22775	mRNA	NM_178231	NM_178231	NM_178231	130026	Hs.516629	ICA1L	islet cell autoantigen 1,69kDa-like	ENST00000411681	THC2652601	NA	Homo sapiens islet cell autoantigen 1,69kDa-like (ICA1L), transcript variant 2, mRNA [NM_178231]	chr2:203690484-203690425	hs|2q33.2	Agilent_HUMAN_G3V2	NM_178231	chr2	203690425	203690484	-
LNCA_23_P404565	0.0165081	2.22668	mRNA	NM_030807	NM_030807	NM_030807	66035	Hs.632772	SLC2A11	solute carrier family 2 (facilitated glucose transporter), member 11	ENST00000461809	THC2499495	GO:0016020|GO:0005886|GO:0022891|GO:0008643|GO:0016021|GO:0055085	Homo sapiens solute carrier family 2 (facilitated glucose transporter), member 11 (SLC2A11), transcript variant 1, mRNA [NM_030807]	chr22:24227187-24227246	hs|22q11.23	Agilent_HUMAN_G3V2	NM_030807	chr22	24227187	24227246	+
LNCA_21_P0000538	0.0113204	2.2229	mRNA	NR_027469	NR_027469	NR_027469	NA	NA	LOC100286793	uncharacterized LOC100286793	NA	NA	NA	Homo sapiens uncharacterized LOC100286793 (LOC100286793), non-coding RNA [NR_027469]	chr1:143721052-143719904	hs|1q21.1	Agilent_HUMAN_G3V2	NR_027469	chr1	143719904	143721052	-
LNCA_33_P3419998	0.0208919	2.21936	mRNA	NM_001039960	NM_001039960	NM_001039960	9498	Hs.370636	SLC4A8	solute carrier family 4, sodium bicarbonate cotransporter, member 8	ENST00000546875	THC2605314	GO:0005215|GO:0015297|GO:0005886|GO:0005452|GO:0015701|GO:0016021|GO:0006814|GO:0055085|GO:0006811	Homo sapiens solute carrier family 4, sodium bicarbonate cotransporter, member 8 (SLC4A8), transcript variant 1, mRNA [NM_001039960]	chr12:51902921-51902980	hs|12q13.13	Agilent_HUMAN_G3V2	NM_001039960	chr12	51902921	51902980	+
LNCA_21_P0010600	0.00903377	2.21875	mRNA	NR_026752	NR_026752	NR_026752	NA	Hs.631865	CROCCP2	ciliary rootlet coiled-coil, rootletin pseudogene 2	NA	THC2567739	NA	Homo sapiens ciliary rootlet coiled-coil, rootletin pseudogene 2 (CROCCP2), non-coding RNA [NR_026752]	chr1:16952877-16952471	hs|1p36.13	Agilent_HUMAN_G3V2	NR_026752	chr1	16952471	16952877	-
LNCA_21_P0010943	0.0306521	2.21457	mRNA	ENST00000440803	NA	CN411518	NA	Hs.499496	XLOC_l2_001952	NA	ENST00000440803	THC2530416	NA	NA	chr10:46349596-46349537	hs|10q11.22	Agilent_HUMAN_G3V2	ENST00000440803	chr10	46349537	46349596	-
LNCA_21_P0000788	0.0305496	2.21257	mRNA	NR_038402	NR_038402	NR_038402	NA	NA	LOC100507387	uncharacterized LOC100507387	ENST00000513787	THC2513705	NA	Homo sapiens uncharacterized LOC100507387 (LOC100507387), non-coding RNA [NR_038402]	chr5:175552106-175552165	hs|5q35.2	Agilent_HUMAN_G3V2	NR_038402	chr5	175552106	175552165	+
LNCA_24_P254551	0.0171262	2.21109	mRNA	NM_015185	NM_015185	NM_015185	23229	Hs.54697	ARHGEF9	Cdc42 guanine nucleotide exchange factor (GEF) 9	ENST00000374870	THC2492784	GO:0008624|GO:0051056|GO:0048011|GO:0007264|GO:0035023|GO:0006915|GO:0007268|GO:0055085|GO:0005829|GO:0005085|GO:0005622|GO:0005737|GO:0034220|GO:0005089	Homo sapiens Cdc42 guanine nucleotide exchange factor (GEF) 9 (ARHGEF9), transcript variant 1, mRNA [NM_015185]	chrX:62855397-62855338	hs|Xq11.1	Agilent_HUMAN_G3V2	NM_015185	chrX	62855338	62855397	-
LNCA_24_P191847	0.032959	2.20925	mRNA	NM_024754	NM_024754	NM_024754	79810	Hs.126906	PTCD2	pentatricopeptide repeat domain 2	ENST00000515198	THC2766704	GO:0048747|GO:0007507|GO:0005739|GO:0001889|GO:0055010|GO:0001822|GO:0007005|GO:0050684	Homo sapiens pentatricopeptide repeat domain 2 (PTCD2), mRNA [NM_024754]	chr5:71648475-71648534	hs|5q13.2	Agilent_HUMAN_G3V2	NM_024754	chr5	71648475	71648534	+
LNCA_24_P182929	0.0329455	2.20858	mRNA	NM_003471	NM_003471	NM_003471	7881	Hs.654519	KCNAB1	potassium voltage-gated channel, shaker-related subfamily, beta member 1	ENST00000490337	THC2485727	GO:0005737|GO:0005244|GO:0005886|GO:0005249|GO:0015459|GO:0007268|GO:0016021|GO:0055085|GO:0006813|GO:0006811	Homo sapiens potassium voltage-gated channel, shaker-related subfamily, beta member 1 (KCNAB1), transcript variant 2, mRNA [NM_003471]	chr3:156255847-156255906	hs|3q25.31	Agilent_HUMAN_G3V2	NM_003471	chr3	156255847	156255906	+
LNCA_24_P377775	0.00232431	2.20778	mRNA	NM_017790	NM_017790	NM_017790	5998	Hs.494875	RGS3	regulator of G-protein signaling 3	ENST00000460000	THC2588562	GO:0043547|GO:0000188|GO:0005737|GO:0008277|GO:0005886|GO:0005634|GO:0009968|GO:0004871|GO:0005829|GO:0005096	Homo sapiens regulator of G-protein signaling 3 (RGS3), transcript variant 3, mRNA [NM_017790]	chr9:116291501-116299091	hs|9q32	Agilent_HUMAN_G3V2	NM_017790	chr9	116291501	116299091	+
LNCA_21_P0000655	0.0153867	2.20568	mRNA	NR_036511	NR_036511	NR_036511	NA	Hs.707307	LOC100129917	uncharacterized LOC100129917	ENST00000503185	THC2474955	NA	Homo sapiens uncharacterized LOC100129917 (LOC100129917), transcript variant 1, non-coding RNA [NR_036511]	chr4:774337-774278	hs|4p16.3	Agilent_HUMAN_G3V2	NR_036511	chr4	774278	774337	-
LNCA_19_P00813085	0.0101901	2.20536	mRNA	CN388809	NA	CN388809	NA	Hs.713933	XLOC_011183	NA	NA	THC2528229	NA	17000600026802 GRN_PREHEP Homo sapiens cDNA 5', mRNA sequence [CN388809]	chr15:25267574-25267633	hs|15q11.2	Agilent_HUMAN_G3V2	CN388809	chr15	25267574	25267633	+
LNCA_23_P133543	0.00101068	2.20353	mRNA	NM_017415	NM_017415	NM_017415	26249	Hs.655084	KLHL3	kelch-like 3 (Drosophila)	ENST00000309755	THC2465052	GO:0005737|GO:0005198|GO:0003779|GO:0005856	Homo sapiens kelch-like 3 (Drosophila) (KLHL3), mRNA [NM_017415]	chr5:136953347-136953288	hs|5q31.2	Agilent_HUMAN_G3V2	NM_017415	chr5	136953288	136953347	-
LNCA_33_P3235400	0.0333438	2.20199	mRNA	NM_004494	NM_004494	NM_004494	3068	Hs.506748	HDGF	hepatoma-derived growth factor	ENST00000406805	NP417915	GO:0007165|GO:0006355|GO:0005737|GO:0000166|GO:0008283|GO:0005654|GO:0005634|GO:0008201|GO:0008083|GO:0005615|GO:0003677	Homo sapiens hepatoma-derived growth factor (HDGF), transcript variant 1, mRNA [NM_004494]	chr1:156713610-156713551	hs|1q23.1	Agilent_HUMAN_G3V2	NM_004494	chr1	156713551	156713610	-
LNCA_33_P3261927	0.0387366	2.2001	mRNA	NM_213603	NM_213603	NM_213603	285989	Hs.440384	ZNF789	zinc finger protein 789	ENST00000331410	THC2483432	GO:0005622|GO:0006355|GO:0008270|GO:0005634|GO:0003677|GO:0046872	Homo sapiens zinc finger protein 789 (ZNF789), transcript variant 1, mRNA [NM_213603]	chr7:99085034-99085093	hs|7q22.1	Agilent_HUMAN_G3V2	NM_213603	chr7	99085034	99085093	+
LNCA_33_P3351811	0.0312125	2.19977	mRNA	ENST00000409698	NA	NA	5433	NA	POLR2D	polymerase (RNA) II (DNA directed) polypeptide D	ENST00000409698	THC2527183	GO:0008380|GO:0010467|GO:0006368|GO:0006367|GO:0006366|GO:0003899|GO:0006370|GO:0005634|GO:0003824|GO:0050434|GO:0004672|GO:0006281|GO:0000166|GO:0000398|GO:0006283|GO:0005665|GO:0016032|GO:0006468|GO:0005654|GO:0006289|GO:0044237	polymerase (RNA) II (DNA directed) polypeptide D [Source:HGNC Symbol;Acc:9191] [ENST00000409698]	chr2:128615405-128615346	hs|2q14.3	Agilent_HUMAN_G3V2	ENST00000409698	chr2	128615346	128615405	-
LNCA_24_P391868	0.0378394	2.19842	mRNA	NM_006650	NM_006650	NM_006650	10814	Hs.193235	CPLX2	complexin 2	ENST00000359546	THC2524412	GO:0043303|GO:0045202|GO:0031201|GO:0016079|GO:0030154|GO:0030425|GO:0005829|GO:0006904|GO:0007399|GO:0005737|GO:0031915|GO:0006836|GO:0043025|GO:0017075	Homo sapiens complexin 2 (CPLX2), transcript variant 1, mRNA [NM_006650]	chr5:175310054-175310113	hs|5q35.2	Agilent_HUMAN_G3V2	NM_006650	chr5	175310054	175310113	+
LNCA_21_P0000005	0.00140142	2.1969	mRNA	NM_001105565	NM_001105565	NM_001105565	NA	Hs.68756	SMTNL1	smoothelin-like 1	ENST00000457912	THC2659058	GO:0005516|GO:0005737|GO:0045907|GO:0043292|GO:0045908|GO:0005634|GO:0031430|GO:0030017	Homo sapiens smoothelin-like 1 (SMTNL1), mRNA [NM_001105565]	chr11:57317688-57317747	hs|11q12.1	Agilent_HUMAN_G3V2	NM_001105565	chr11	57317688	57317747	+
LNCA_23_P216501	0.033103	2.19262	mRNA	NM_213674	NM_213674	NM_213674	7169	Hs.300772	TPM2	tropomyosin 2 (beta)	ENST00000329305	THC2560693	GO:0005862|GO:0005737|GO:0030049|GO:0006936|GO:0043462|GO:0003779|GO:0008307|GO:0005856|GO:0005829	Homo sapiens tropomyosin 2 (beta) (TPM2), transcript variant 2, mRNA [NM_213674]	chr9:35682147-35682088	hs|9p13.3	Agilent_HUMAN_G3V2	NM_213674	chr9	35682088	35682147	-
LNCA_21_P0000761	0.0488947	2.19057	mRNA	NR_038319	NR_038319	NR_038319	NA	Hs.679092	LOC100505716	uncharacterized LOC100505716	ENST00000418963	THC2503353	NA	Homo sapiens uncharacterized LOC100505716 (LOC100505716), non-coding RNA [NR_038319]	chr2:28530745-28530686	hs|2p23.2	Agilent_HUMAN_G3V2	NR_038319	chr2	28530686	28530745	-
LNCA_23_P29830	0.00115354	2.18995	mRNA	NM_170662	NM_170662	NM_170662	868	Hs.430589	CBLB	Cas-Br-M (murine) ecotropic retroviral transforming sequence b	ENST00000405772	NP091053	GO:0005515|GO:0004842|GO:0045732|GO:0016874|GO:0005634|GO:0006607|GO:0035556|GO:0006955|GO:0005737|GO:0004871|GO:0009725|GO:0019901|GO:0023051|GO:0046642|GO:0005509|GO:0005730|GO:0050860|GO:0007165|GO:0042110|GO:0009629|GO:0002669|GO:0001784|GO:0008270|GO:0045121|GO:0007166	Homo sapiens Cas-Br-M (murine) ecotropic retroviral transforming sequence b (CBLB), mRNA [NM_170662]	chr3:105400640-105400581	hs|3q13.11	Agilent_HUMAN_G3V2	NM_170662	chr3	105400581	105400640	-
LNCA_24_P37264	0.00484325	2.18697	mRNA	NM_014746	NM_014746	NM_014746	9781	Hs.22146	RNF144A	ring finger protein 144A	ENST00000320892	THC2748289	GO:0005794|GO:0016020|GO:0016874|GO:0008270|GO:0016021|GO:0046872	Homo sapiens ring finger protein 144A (RNF144A), mRNA [NM_014746]	chr2:7183304-7183363	hs|2p25.1	Agilent_HUMAN_G3V2	NM_014746	chr2	7183304	7183363	+
LNCA_33_P3348234	0.0257282	2.1844	mRNA	AK024925	NA	AK024925	NA	Hs.612891	NA	NA	NA	THC2481094	NA	Homo sapiens cDNA: FLJ21272 fis, clone COL01753. [AK024925]	chr1:144990583-144990642	hs|1q21.1	Agilent_HUMAN_G3V2	AK024925	chr1	144990583	144990642	+
LNCA_23_P13822	0.0268685	2.18438	mRNA	NM_018423	NM_018423	NM_018423	55359	Hs.24979	STYK1	serine/threonine/tyrosine kinase 1	ENST00000075503	THC2475559	GO:0005886|GO:0000166|GO:0016021|GO:0005524|GO:0004715	Homo sapiens serine/threonine/tyrosine kinase 1 (STYK1), mRNA [NM_018423]	chr12:10771913-10771854	hs|12p13.2	Agilent_HUMAN_G3V2	NM_018423	chr12	10771854	10771913	-
LNCA_24_P408801	0.0208078	2.18048	mRNA	U71363	NA	U71363	100293516	Hs.658251	LOC100293516	zinc finger protein	NA	THC2508961	NA	Human zinc finger protein zfp6 (ZF6) mRNA, partial cds. [U71363]	chr19:58353424-58353483	hs|19q13.43	Agilent_HUMAN_G3V2	U71363	chr19	58353424	58353483	+
LNCA_33_P3327300	0.0456722	2.17292	mRNA	AK096566	NA	AK096566	100130713	Hs.326953	LOC100130713	uncharacterized LOC100130713	NA	THC2481047	NA	Homo sapiens cDNA FLJ39247 fis, clone OCBBF2008520. [AK096566]	chr19:41191283-41191224	hs|19q13.2	Agilent_HUMAN_G3V2	AK096566	chr19	41191224	41191283	-
LNCA_24_P310224	0.0166252	2.17245	mRNA	NM_032584	NM_032584	NM_032584	84671	Hs.467239	ZNF347	zinc finger protein 347	ENST00000452676	THC2475679	GO:0005622|GO:0006355|GO:0008270|GO:0005634|GO:0003677|GO:0046872	Homo sapiens zinc finger protein 347 (ZNF347), transcript variant 3, mRNA [NM_032584]	chr19:53643774-53643715	hs|19q13.42	Agilent_HUMAN_G3V2	NM_032584	chr19	53643715	53643774	-
LNCA_33_P3221613	0.0399936	2.1707	mRNA	ENST00000444919	NA	NA	NA	NA	NA	NA	ENST00000444919	NA	NA	NA	chr2:173417404-173417345	hs|2q31.1	Agilent_HUMAN_G3V2	ENST00000444919	chr2	173417345	173417404	-
LNCA_23_P168669	0.0133336	2.16899	mRNA	NM_021151	NM_021151	NM_021151	54677	Hs.125039	CROT	carnitine O-octanoyltransferase	ENST00000331536	THC2472830	GO:0016746|GO:0005782|GO:0006810|GO:0006631|GO:0033540|GO:0008458|GO:0006091|GO:0044255|GO:0043231|GO:0005777	Homo sapiens carnitine O-octanoyltransferase (CROT), transcript variant 2, mRNA [NM_021151]	chr7:87027998-87028057	hs|7q21.12	Agilent_HUMAN_G3V2	NM_021151	chr7	87027998	87028057	+
LNCA_24_P944144	0.0443391	2.16711	mRNA	NM_080797	NM_080797	NM_080797	11083	Hs.517172	DIDO1	death inducer-obliterator 1	ENST00000395335	THC2524396	GO:0005737|GO:0006915|GO:0008270|GO:0005634|GO:0046872|GO:0006351	Homo sapiens death inducer-obliterator 1 (DIDO1), transcript variant 3, mRNA [NM_080797]	chr20:61518663-61518604	hs|20q13.33	Agilent_HUMAN_G3V2	NM_080797	chr20	61518604	61518663	-
LNCA_21_P0013332	0.0101113	2.16632	mRNA	NR_003666	NR_003666	NR_003666	NA	Hs.571275	SPDYE7P	speedy homolog E7 (Xenopus laevis), pseudogene	ENST00000489778	THC2574297	NA	Homo sapiens speedy homolog E7 (Xenopus laevis), pseudogene (SPDYE7P), non-coding RNA [NR_003666]	chr7:72338311-72338252	hs|7q11.23	Agilent_HUMAN_G3V2	NR_003666	chr7	72338252	72338311	-
LNCA_21_P0010263	0.00669841	2.16607	mRNA	BX105611	NA	BX105611	NA	Hs.615521	XLOC_013981	NA	NA	THC2690150	NA	BX105611 Soares breast 3NbHBst Homo sapiens cDNA clone IMAGp998E16262, mRNA sequence [BX105611]	chr21:46710001-46710060	hs|21q22.3	Agilent_HUMAN_G3V2	BX105611	chr21	46710001	46710060	+
LNCA_24_P417460	0.0389913	2.16465	mRNA	NM_001029880	NM_001029880	NM_001029880	57713	Hs.407983	SFMBT2	Scm-like with four mbt domains 2	ENST00000397167	THC2478520	GO:0006355|GO:0005634	Homo sapiens Scm-like with four mbt domains 2 (SFMBT2), transcript variant 1, mRNA [NM_001029880]	chr10:7204781-7204722	hs|10p14	Agilent_HUMAN_G3V2	NM_001029880	chr10	7204722	7204781	-
LNCA_33_P3247042	0.012258	2.16277	mRNA	NM_002030	NM_002030	NM_002030	2359	Hs.445466	FPR3	formyl peptide receptor 3	ENST00000339223	THC2637585	GO:0004982|GO:0007165|GO:0006935|GO:0005886|GO:0004930|GO:0006928|GO:0004872|GO:0016021|GO:0004871	Homo sapiens formyl peptide receptor 3 (FPR3), mRNA [NM_002030]	chr19:52329200-52329259	hs|19q13.41	Agilent_HUMAN_G3V2	NM_002030	chr19	52329200	52329259	+
LNCA_24_P67806	0.00926606	2.16227	mRNA	NM_000254	NM_000254	NM_000254	4548	Hs.498187	MTR	5-methyltetrahydrofolate-homocysteine methyltransferase	ENST00000366577	THC2491590	GO:0006805|GO:0031419|GO:0008168|GO:0008652|GO:0005625|GO:0042558|GO:0032259|GO:0008705|GO:0050667|GO:0046872|GO:0005829|GO:0007399|GO:0005622|GO:0005542|GO:0005737|GO:0046653|GO:0006479|GO:0008270|GO:0008898|GO:0016740	Homo sapiens 5-methyltetrahydrofolate-homocysteine methyltransferase (MTR), mRNA [NM_000254]	chr1:237066633-237066692	hs|1q43	Agilent_HUMAN_G3V2	NM_000254	chr1	237066633	237066692	+
LNCA_33_P3287108	0.029584	2.16161	mRNA	NM_207313	NM_207313	NM_207313	124842	Hs.310482	TMEM132E	transmembrane protein 132E	ENST00000321639	THC2480649	GO:0016020|GO:0016021	Homo sapiens transmembrane protein 132E (TMEM132E), mRNA [NM_207313]	chr17:32966249-32966308	hs|17q12	Agilent_HUMAN_G3V2	NM_207313	chr17	32966249	32966308	+
LNCA_21_P0002604	0.0115696	2.16039	mRNA	ENST00000480208	NA	BG219825	NA	Hs.708835	XLOC_001576	NA	ENST00000480208	THC2492667	NA	RST39591 Athersys RAGE Library Homo sapiens cDNA, mRNA sequence [BG219825]	chr2:98088586-98088645	hs|2q11.2	Agilent_HUMAN_G3V2	ENST00000480208	chr2	98088586	98088645	+
LNCA_21_P0010604	0.0336639	2.15938	mRNA	NM_001198832	NM_001198832	NM_001198832	NA	Hs.708687	PDE4DIP	phosphodiesterase 4D interacting protein	ENST00000313382	THC2491332	GO:0005515|GO:0005813|GO:0005737|GO:0005794|GO:0005634|GO:0030016|GO:0019899|GO:0005856|GO:0043623	Homo sapiens phosphodiesterase 4D interacting protein (PDE4DIP), transcript variant 8, mRNA [NM_001198832]	chr1:144881500-144881441	hs|1q21.1	Agilent_HUMAN_G3V2	NM_001198832	chr1	144881441	144881500	-
LNCA_24_P912439	0.0469002	2.15937	mRNA	ENST00000312033	NA	AB075848	80709	Hs.494895	AKNA	AT-hook transcription factor	ENST00000312033	NP1242542	GO:0006355|GO:0005634|GO:0003677	AT-hook transcription factor [Source:HGNC Symbol;Acc:24108] [ENST00000312033]	chr9:117121825-117121766	hs|9q32	Agilent_HUMAN_G3V2	ENST00000312033	chr9	117121766	117121825	-
LNCA_33_P3397910	0.0477003	2.15752	mRNA	THC2680929	NA	NA	NA	NA	NA	NA	NA	THC2680929	NA	ALU1_HUMAN (P39188) Alu subfamily J sequence contamination warning entry, partial (5%) [THC2680929]	chr2:065283319-065283260	hs|2p14	Agilent_HUMAN_G3V2	THC2680929	chr2	65283260	65283319	-
LNCA_21_P0004274	0.0396187	2.1572	mRNA	CR625773	NA	CR625773	NA	Hs.559426	LOC100505894	uncharacterized LOC100505894	NA	THC2757513	NA	full-length cDNA clone CS0DF027YN23 of Fetal brain of Homo sapiens (human) [CR625773]	chr5:87581609-87581668	hs|5q14.3	Agilent_HUMAN_G3V2	CR625773	chr5	87581609	87581668	+
LNCA_33_P3233081	0.0388011	2.15609	mRNA	NM_002441	NM_002441	NM_002441	4439	Hs.647011	MSH5	mutS homolog 5 (E. coli)	ENST00000423982	THC2552109	GO:0030983|GO:0000795|GO:0005524|GO:0003684|GO:0007136|GO:0032300|GO:0007126|GO:0000166|GO:0000710|GO:0051026|GO:0045143|GO:0006298|GO:0007131|GO:0008094	Homo sapiens mutS homolog 5 (E. coli) (MSH5), transcript variant 3, mRNA [NM_002441]	chr6:31730225-31730284	hs|6p21.33	Agilent_HUMAN_G3V2	NM_002441	chr6	31730225	31730284	+
LNCA_23_P343594	0.0349636	2.15587	mRNA	NM_018218	NM_018218	NM_018218	55230	Hs.96513	USP40	ubiquitin specific peptidase 40	ENST00000251722	THC2492093	GO:0006511|GO:0006508|GO:0008233|GO:0008234|GO:0004221	Homo sapiens ubiquitin specific peptidase 40 (USP40), mRNA [NM_018218]	chr2:234385112-234385053	hs|2q37.1	Agilent_HUMAN_G3V2	NM_018218	chr2	234385053	234385112	-
LNCA_33_P3253792	0.041051	2.15583	mRNA	ENST00000342995	XR_109761	XR_109761	NA	Hs.97053	NA	NA	ENST00000342995	THC2483026	NA	chromosome X open reading frame 67 [Source:HGNC Symbol;Acc:33738] [ENST00000342995]	chrX:51151603-51151662	hs|Xp11.22	Agilent_HUMAN_G3V2	ENST00000342995	chrX	51151603	51151662	+
LNCA_33_P3282374	0.0253517	2.15555	mRNA	ENST00000535064	NA	NA	26230	NA	TIAM2	T-cell lymphoma invasion and metastasis 2	ENST00000535064	THC2661723	GO:0051056|GO:0008624|GO:0048011|GO:0007264|GO:0035023|GO:0006915|GO:0030175|GO:0030027|GO:0005829|GO:0030426|GO:0005085|GO:0005737|GO:0005057|GO:0005089|GO:0044255	T-cell lymphoma invasion and metastasis 2 [Source:HGNC Symbol;Acc:11806] [ENST00000535064]	chr6:155282554-155282613	hs|6q25.2	Agilent_HUMAN_G3V2	ENST00000535064	chr6	155282554	155282613	+
LNCA_24_P19677	0.0390891	2.15398	mRNA	NM_173065	NM_173065	NM_173065	163702	Hs.221375	IL28RA	interleukin 28 receptor, alpha (interferon, lambda receptor)	ENST00000374418	NP586792	GO:0005515|GO:0008285|GO:0004896|GO:0016020|GO:0032002|GO:0019221|GO:0004872|GO:0016021|GO:0050691	Homo sapiens interleukin 28 receptor, alpha (interferon, lambda receptor) (IL28RA), transcript variant 3, mRNA [NM_173065]	chr1:24496050-24495991	hs|1p36.11	Agilent_HUMAN_G3V2	NM_173065	chr1	24495991	24496050	-
LNCA_33_P3298960	0.0440969	2.15385	mRNA	NM_153705	NM_153705	NM_153705	143888	Hs.83286	KDELC2	KDEL (Lys-Asp-Glu-Leu) containing 2	ENST00000375648	NP862217	GO:0008150|GO:0003674|GO:0005783|GO:0005788|GO:0005575	Homo sapiens KDEL (Lys-Asp-Glu-Leu) containing 2 (KDELC2), mRNA [NM_153705]	chr11:108350112-108350053	hs|11q22.3	Agilent_HUMAN_G3V2	NM_153705	chr11	108350053	108350112	-
LNCA_23_P415652	0.0262857	2.15298	mRNA	NM_024642	NM_024642	NM_024642	79695	Hs.47099	GALNT12	UDP-N-acetyl-alpha-D-galactosamine:polypeptide N-acetylgalactosaminyltransferase 12 (GalNAc-T12)	ENST00000375011	THC2470561	GO:0004653|GO:0005794|GO:0016020|GO:0000139|GO:0016757|GO:0005529|GO:0016021	Homo sapiens UDP-N-acetyl-alpha-D-galactosamine:polypeptide N-acetylgalactosaminyltransferase 12 (GalNAc-T12) (GALNT12), mRNA [NM_024642]	chr9:101608379-101611266	hs|9q22.33	Agilent_HUMAN_G3V2	NM_024642	chr9	101608379	101611266	+
LNCA_33_P3437273	0.034557	2.1515	mRNA	BC007304	NA	BC007304	84843	Hs.652898	MGC15705	uncharacterized protein MGC15705	NA	NA	NA	Homo sapiens hypothetical protein MGC15705, mRNA (cDNA clone MGC:15705 IMAGE:3352097), complete cds. [BC007304]	chr22:31726119-31726178	hs|22q12.2	Agilent_HUMAN_G3V2	BC007304	chr22	31726119	31726178	+
LNCA_21_P0011085	0.0432376	2.14999	mRNA	ENST00000520314	XM_001715897	XM_001715897	NA	Hs.568152	XLOC_l2_003293	NA	ENST00000520314	THC2498299	NA	PREDICTED: Homo sapiens ovostatin (OVOS), mRNA [XM_001715897]	chr12:9723378-9723437	hs|12p13.31	Agilent_HUMAN_G3V2	ENST00000520314	chr12	9723378	9723437	+
LNCA_21_P0014011	0.00352287	2.14765	mRNA	XM_003403458	XM_003403458	XM_003403458	NA	Hs.715074	LOC100507419	uncharacterized LOC100507419	NA	THC2474520	NA	PREDICTED: Homo sapiens hypothetical protein LOC100652888 (LOC100652888), mRNA [XM_003403458]	chr16:3103850-3103791	hs|16p13.3	Agilent_HUMAN_G3V2	XM_003403458	chr16	3103791	3103850	-
LNCA_33_P3249125	0.0319848	2.14718	mRNA	NM_173167	NM_173167	NM_173167	146862	Hs.379636	UNC45B	unc-45 homolog B (C. elegans)	ENST00000268876	THC2600942	GO:0005737|GO:0007517|GO:0005488|GO:0007275|GO:0030154|GO:0005829	Homo sapiens unc-45 homolog B (C. elegans) (UNC45B), transcript variant 1, mRNA [NM_173167]	chr17:33516203-33516262	hs|17q12	Agilent_HUMAN_G3V2	NM_173167	chr17	33516203	33516262	+
LNCA_32_P153071	0.00858386	2.14653	mRNA	NM_003382	NM_003382	NM_003382	7434	Hs.585052	VIPR2	vasoactive intestinal peptide receptor 2	ENST00000262178	THC2473346	GO:0007190|GO:0007165|GO:0007186|GO:0005886|GO:0004999|GO:0005887|GO:0004930|GO:0007267|GO:0004872|GO:0016021|GO:0004871	Homo sapiens vasoactive intestinal peptide receptor 2 (VIPR2), mRNA [NM_003382]	chr7:158821273-158821214	hs|7q36.3	Agilent_HUMAN_G3V2	NM_003382	chr7	158821214	158821273	-
LNCA_24_P237778	0.0354729	2.14442	mRNA	NM_020379	NM_020379	NM_020379	57134	Hs.197043	MAN1C1	mannosidase, alpha, class 1C, member 1	ENST00000263979	THC2463347	GO:0005794|GO:0004571|GO:0005509|GO:0030173|GO:0000139|GO:0016020|GO:0016798|GO:0008152|GO:0006487|GO:0016021|GO:0044267|GO:0018279|GO:0043687	Homo sapiens mannosidase, alpha, class 1C, member 1 (MAN1C1), mRNA [NM_020379]	chr1:26098204-26098263	hs|1p36.11	Agilent_HUMAN_G3V2	NM_020379	chr1	26098204	26098263	+
LNCA_33_P3309491	0.0481444	2.14362	mRNA	NM_005704	NM_005704	NM_005704	10076	Hs.19718	PTPRU	protein tyrosine phosphatase, receptor type, U	ENST00000323874	THC2484946	GO:0005515|GO:0030336|GO:0008285|GO:0005886|GO:0008013|GO:0035335|GO:0030154|GO:0034109|GO:0016337|GO:0006470|GO:0016787|GO:0005001|GO:0005887|GO:0005911|GO:0034394|GO:0007185|GO:0004872|GO:0007155|GO:0060070|GO:0004725	Homo sapiens protein tyrosine phosphatase, receptor type, U (PTPRU), transcript variant 3, mRNA [NM_005704]	chr1:29653254-29653313	hs|1p35.3	Agilent_HUMAN_G3V2	NM_005704	chr1	29653254	29653313	+
LNCA_24_P298495	0.0445185	2.14158	mRNA	AF289590	NA	AF289590	100130744	Hs.660550	LOC100130744	uncharacterized LOC100130744	NA	THC2478574	NA	Homo sapiens clone pp7583 unknown mRNA. [AF289590]	chr5:14714903-14714962	hs|5p15.2	Agilent_HUMAN_G3V2	AF289590	chr5	14714903	14714962	+
LNCA_33_P3271810	0.00900935	2.13805	mRNA	NM_015020	NM_015020	NM_015020	23035	Hs.709458	PHLPP2	PH domain and leucine rich repeat protein phosphatase 2	ENST00000299971	THC2498969	GO:0005737|GO:0016787|GO:0016020|GO:0005634|GO:0004721|GO:0046872	Homo sapiens PH domain and leucine rich repeat protein phosphatase 2 (PHLPP2), mRNA [NM_015020]	chr16:71686757-71686698	hs|16q22.2	Agilent_HUMAN_G3V2	NM_015020	chr16	71686698	71686757	-
LNCA_23_P21990	0.0355792	2.1365	mRNA	NM_152685	NM_152685	NM_152685	9963	Hs.643467	SLC23A1	solute carrier family 23 (nucleobase transporters), member 1	ENST00000453898	THC2487776	GO:0005515|GO:0005215|GO:0005886|GO:0015882|GO:0070890|GO:0006767|GO:0070837|GO:0071436|GO:0005737|GO:0016324|GO:0043229|GO:0015205|GO:0006814|GO:0070904|GO:0015229|GO:0006811|GO:0015293|GO:0015851|GO:0005624|GO:0009636|GO:0015081|GO:0008520|GO:0006139|GO:0007420|GO:0006766|GO:0005887|GO:0033300	Homo sapiens solute carrier family 23 (nucleobase transporters), member 1 (SLC23A1), transcript variant 2, mRNA [NM_152685]	chr5:138707745-138707686	hs|5q31.2	Agilent_HUMAN_G3V2	NM_152685	chr5	138707686	138707745	-
LNCA_19_P00318507	0.0430914	2.13475	mRNA	ENST00000432194	XR_110395	XR_110395	NA	NA	XLOC_002997	NA	ENST00000432194	THC2586042	NA	NA	chr3:195435619-195435678	hs|3q29	Agilent_HUMAN_G3V2	ENST00000432194	chr3	195435619	195435678	+
LNCA_21_P0000709	0.0337148	2.13426	mRNA	NR_037934	NR_037934	NR_037934	NA	NA	LOC285540	uncharacterized LOC285540	ENST00000507794	THC2501895	NA	Homo sapiens uncharacterized LOC285540 (LOC285540), non-coding RNA [NR_037934]	chr4:25200019-25200078	hs|4p15.2	Agilent_HUMAN_G3V2	NR_037934	chr4	25200019	25200078	+
LNCA_33_P3289162	0.0240036	2.13138	mRNA	ENST00000378305	NA	AK128867	NA	Hs.674050	NA	NA	ENST00000378305	NA	NA	stonin 1 [Source:HGNC Symbol;Acc:17003] [ENST00000484110]	chr2:48758983-48759042	hs|2p16.3	Agilent_HUMAN_G3V2	ENST00000378305	chr2	48758983	48759042	+
LNCA_33_P3241433	0.0263543	2.13031	mRNA	NM_001172674	NM_001172674	NM_001172674	84671	Hs.467239	ZNF347	zinc finger protein 347	ENST00000436933	THC2475679	GO:0005622|GO:0006355|GO:0008270|GO:0005634|GO:0003677|GO:0046872	Homo sapiens zinc finger protein 347 (ZNF347), transcript variant 1, mRNA [NM_001172674]	chr19:53643632-53643573	hs|19q13.42	Agilent_HUMAN_G3V2	NM_001172674	chr19	53643573	53643632	-
LNCA_32_P79190	0.0104702	2.13009	mRNA	ENST00000456460	XR_110942	XR_110942	NA	Hs.730425	NA	NA	ENST00000456460	THC2542356	NA	NA	chr1:143392572-143392631	hs|1q21.1	Agilent_HUMAN_G3V2	ENST00000456460	chr1	143392572	143392631	+
LNCA_33_P3365408	0.0187849	2.12869	mRNA	NR_026947	NR_026947	NR_026947	283314	Hs.246046	MATL2963	uncharacterized LOC283314	ENST00000541775	NA	NA	Homo sapiens uncharacterized LOC283314 (MATL2963), non-coding RNA [NR_026947]	chr12:7271213-7271272	hs|12p13.31	Agilent_HUMAN_G3V2	NR_026947	chr12	7271213	7271272	+
LNCA_23_P26854	0.0148262	2.12119	mRNA	NM_014859	NM_014859	NM_014859	9912	Hs.499758	ARHGAP44	Rho GTPase activating protein 44	ENST00000379672	THC2471834	GO:0005622|GO:0051056|GO:0007165|GO:0005737|GO:0007264|GO:0005829|GO:0005096	Homo sapiens Rho GTPase activating protein 44 (ARHGAP44), mRNA [NM_014859]	chr17:12894799-12894858	hs|17p12	Agilent_HUMAN_G3V2	NM_014859	chr17	12894799	12894858	+
LNCA_21_P0000154	0.026365	2.12111	mRNA	NM_001204358	NM_001204358	NM_001204358	NA	NA	SPOCK3	sparc/osteonectin, cwcv and kazal-like domains proteoglycan (testican) 3	ENST00000512648	THC2486190	GO:0031012|GO:0010951|GO:0004857|GO:0019800|GO:0007165|GO:0008191|GO:0005509|GO:0005578|GO:0005576|GO:0005539|GO:0005615	Homo sapiens sparc/osteonectin, cwcv and kazal-like domains proteoglycan (testican) 3 (SPOCK3), transcript variant 9, mRNA [NM_001204358]	chr4:167675338-167675279	hs|4q32.3	Agilent_HUMAN_G3V2	NM_001204358	chr4	167675279	167675338	-
LNCA_23_P171107	0.0395365	2.1206	mRNA	NM_033031	NM_033031	NM_033031	85417	Hs.130310	CCNB3	cyclin B3	ENST00000376042	THC2476102	GO:0005515|GO:0007049|GO:0007126|GO:0019901|GO:0010389|GO:0005730|GO:0005634|GO:0000079|GO:0051301	Homo sapiens cyclin B3 (CCNB3), transcript variant 3, mRNA [NM_033031]	chrX:50094691-50094750	hs|Xp11.22	Agilent_HUMAN_G3V2	NM_033031	chrX	50094691	50094750	+
LNCA_21_P0000467	0.0368821	2.11903	mRNA	NR_003692	NR_003692	NR_003692	NA	NA	SNORD124	small nucleolar RNA, C/D box 124	NA	NA	NA	Homo sapiens small nucleolar RNA, C/D box 124 (SNORD124), small nucleolar RNA [NR_003692]	chr17:38183834-38183893	hs|17q21.1	Agilent_HUMAN_G3V2	NR_003692	chr17	38183834	38183893	+
LNCA_24_P481375	0.0265983	2.11693	mRNA	NR_034089	NR_034089	NR_034089	100131564	Hs.648647	LOC100131564	uncharacterized LOC100131564	ENST00000421202	THC2547634	NA	Homo sapiens uncharacterized LOC100131564 (LOC100131564), non-coding RNA [NR_034089]	chr1:93803884-93803825	hs|1p22.1	Agilent_HUMAN_G3V2	NR_034089	chr1	93803825	93803884	-
LNCA_23_P114299	0.00766147	2.11515	mRNA	NM_001504	NM_001504	NM_001504	2833	Hs.198252	CXCR3	chemokine (C-X-C motif) receptor 3	ENST00000373691	THC2477006	GO:0005886|GO:0004930|GO:0006928|GO:0007204|GO:0019956|GO:0005737|GO:0006935|GO:0005887|GO:0016494|GO:0004950|GO:0004872|GO:0004871|GO:0007155	Homo sapiens chemokine (C-X-C motif) receptor 3 (CXCR3), transcript variant 1, mRNA [NM_001504]	chrX:70835866-70835807	hs|Xq13.1	Agilent_HUMAN_G3V2	NM_001504	chrX	70835807	70835866	-
LNCA_24_P630490	0.0391356	2.11512	mRNA	NM_001042702	NM_001042702	NM_001042702	494513	Hs.87734	DFNB59	deafness, autosomal recessive 59	ENST00000375129	THC2501561	GO:0007605|GO:0043025	Homo sapiens deafness, autosomal recessive 59 (DFNB59), mRNA [NM_001042702]	chr2:179325165-179325759	hs|2q31.2	Agilent_HUMAN_G3V2	NM_001042702	chr2	179325165	179325759	+
LNCA_23_P431268	0.0411328	2.11477	mRNA	NM_014935	NM_014935	NM_014935	22874	Hs.253146	PLEKHA6	pleckstrin homology domain containing, family A member 6	NA	THC2473003	NA	Homo sapiens pleckstrin homology domain containing, family A member 6 (PLEKHA6), mRNA [NM_014935]	chr1:204188069-204188010	hs|1q32.1	Agilent_HUMAN_G3V2	NM_014935	chr1	204188010	204188069	-
LNCA_21_P0006504	0.014711	2.11364	mRNA	THC2642571	NA	NA	NA	NA	XLOC_008005	NA	NA	THC2642571	NA	ALU7_HUMAN (P39194) Alu subfamily SQ sequence contamination warning entry, partial (12%) [THC2642571]	NA	NA	Agilent_HUMAN_G3V2	THC2642571	NA	NA	NA	+
LNCA_33_P3247848	0.0428778	2.11244	mRNA	NM_001144989	NM_001144989	NM_001144989	730051	Hs.634143	ZNF814	zinc finger protein 814	ENST00000435989	THC2534868	GO:0005622|GO:0006355|GO:0008270|GO:0003676|GO:0046872	Homo sapiens zinc finger protein 814 (ZNF814), mRNA [NM_001144989]	chr19:58380814-58380755	hs|19q13.43	Agilent_HUMAN_G3V2	NM_001144989	chr19	58380755	58380814	-
LNCA_23_P50946	0.0340635	2.11138	mRNA	NM_005855	NM_005855	NM_005855	10267	Hs.471783	RAMP1	receptor (G protein-coupled) activity modifying protein 1	ENST00000254661	THC2464432	GO:0008277|GO:0005886|GO:0005887|GO:0008565|GO:0004872|GO:0015031|GO:0015026|GO:0006886|GO:0005615	Homo sapiens receptor (G protein-coupled) activity modifying protein 1 (RAMP1), mRNA [NM_005855]	chr2:238820661-238820720	hs|2q37.3	Agilent_HUMAN_G3V2	NM_005855	chr2	238820661	238820720	+
LNCA_21_P0000044	0.000645317	2.11035	mRNA	NM_001164460	NM_001164460	NM_001164460	NA	Hs.729825	STEAP1B	STEAP family member 1B	ENST00000475789	THC2480608	GO:0016020|GO:0005506|GO:0050660|GO:0016491|GO:0009055|GO:0016021	Homo sapiens STEAP family member 1B (STEAP1B), transcript variant 1, mRNA [NM_001164460]	chr7:22532239-22478371	hs|7p15.3	Agilent_HUMAN_G3V2	NM_001164460	chr7	22478371	22532239	-
LNCA_33_P3347452	0.0190687	2.10989	mRNA	NM_021135	NM_021135	NM_021135	6196	Hs.655277	RPS6KA2	ribosomal protein S6 kinase, 90kDa, polypeptide 2	ENST00000510118	THC2635208	GO:0008285|GO:0034142|GO:0007268|GO:0005634|GO:0051403|GO:0007243|GO:0005829|GO:0035556|GO:0002756|GO:0005737|GO:0000166|GO:0007411|GO:0002755|GO:0034138|GO:0048011|GO:0034130|GO:0000287|GO:0043065|GO:0034134|GO:0045786|GO:0002224|GO:0005524|GO:0007165|GO:0008063|GO:0004674|GO:0045087|GO:0005840|GO:0005654	Homo sapiens ribosomal protein S6 kinase, 90kDa, polypeptide 2 (RPS6KA2), transcript variant 1, mRNA [NM_021135]	chr6:166822961-166822902	hs|6q27	Agilent_HUMAN_G3V2	NM_021135	chr6	166822902	166822961	-
LNCA_33_P3348086	0.00616897	2.10985	mRNA	THC2496594	NA	NA	NA	NA	NA	NA	NA	THC2496594	NA	ENK5_HUMAN (Q902F9) HERV-K_19p13.11 provirus ancestral Env polyprotein precursor (Envelope polyprotein) (HERV-K113 envelope protein) (EnvK5 protein) [Contains: Surface protein (SU); Transmembrane protein (TM)], partial (16%) [THC2503284]	chr4:004075543-004075602	hs|4p16.3	Agilent_HUMAN_G3V2	THC2496594	chr4	4075543	4075602	+
LNCA_21_P0001550	0.0196038	2.10873	mRNA	NR_034089	NR_034089	NR_034089	NA	Hs.624073	LOC100131564	uncharacterized LOC100131564	ENST00000457025	THC2547634	NA	Homo sapiens uncharacterized LOC100131564 (LOC100131564), non-coding RNA [NR_034089]	chr1:93804009-93803950	hs|1p22.1	Agilent_HUMAN_G3V2	NR_034089	chr1	93803950	93804009	-
LNCA_33_P3229898	0.0119386	2.1078	mRNA	ENST00000379805	NA	NA	5160	NA	PDHA1	pyruvate dehydrogenase (lipoamide) alpha 1	ENST00000379805	THC2526450	GO:0005739|GO:0010510|GO:0006090|GO:0005759|GO:0008152|GO:0016624|GO:0016491|GO:0004738|GO:0004739|GO:0006096	pyruvate dehydrogenase (lipoamide) alpha 1 [Source:HGNC Symbol;Acc:8806] [ENST00000379805]	chrX:19371381-19371440	hs|Xp22.12	Agilent_HUMAN_G3V2	ENST00000379805	chrX	19371381	19371440	+
LNCA_21_P0013675	0.0223578	2.10541	mRNA	NM_001244752	NM_001244752	NM_001244752	NA	Hs.493710	ANKRD18B	ankyrin repeat domain 18B	ENST00000354752	THC2478067	NA	Homo sapiens ankyrin repeat domain 18B (ANKRD18B), mRNA [NM_001244752]	chr9:33558116-33558175	hs|9p13.3	Agilent_HUMAN_G3V2	NM_001244752	chr9	33558116	33558175	+
LNCA_21_P0009092	0.0294863	2.10288	mRNA	THC2509625	NA	NA	NA	NA	XLOC_011630	NA	NA	THC2509625	GO:0006986|GO:0005739|GO:0000166|GO:0006457|GO:0004872|GO:0051082|GO:0005615|GO:0005524	TRAP1_HUMAN (Q12931) Heat shock protein 75 kDa, mitochondrial precursor (HSP 75) (Tumor necrosis factor type 1 receptor-associated protein) (TRAP-1) (TNFR-associated protein 1), partial (74%) [THC2509625]	NA	NA	Agilent_HUMAN_G3V2	THC2509625	NA	NA	NA	+
LNCA_24_P135255	0.0491303	2.10103	mRNA	NR_003365	NR_003365	NR_003365	283507	Hs.442781	SUGT1P3	suppressor of G2 allele of SKP1 (S. cerevisiae) pseudogene 3	ENST00000304932	THC2482766	NA	Homo sapiens suppressor of G2 allele of SKP1 (S. cerevisiae) pseudogene 3 (SUGT1P3), non-coding RNA [NR_003365]	chr13:41486321-41486262	hs|13q14.11	Agilent_HUMAN_G3V2	NR_003365	chr13	41486262	41486321	-
LNCA_33_P3406714	0.0280945	2.09586	mRNA	AK310119	NA	AK310119	100131434	Hs.669775	LOC100131434	uncharacterized LOC100131434	NA	THC2523744	NA	Homo sapiens cDNA, FLJ17161. [AK310119]	chrX:148617730-148617671	hs|Xq28	Agilent_HUMAN_G3V2	AK310119	chrX	148617671	148617730	-
LNCA_24_P678418	0.039487	2.09278	mRNA	NR_015415	NR_015415	NR_015415	400242	NA	DICER1-AS	DICER1 antisense RNA (non-protein coding)	NA	THC2498214	NA	Homo sapiens DICER1 antisense RNA (non-protein coding) (DICER1-AS), non-coding RNA [NR_015415]	chr14:95646100-95646159	hs|14q32.13	Agilent_HUMAN_G3V2	NR_015415	chr14	95646100	95646159	+
LNCA_33_P3407746	0.0460205	2.09269	mRNA	NM_177968	NM_177968	NM_177968	5495	Hs.416769	PPM1B	protein phosphatase, Mg2+/Mn2+ dependent, 1B	ENST00000378551	NA	GO:0005515|GO:0008287|GO:0030145|GO:0006470|GO:0000287|GO:0016787|GO:0004722	Homo sapiens protein phosphatase, Mg2+/Mn2+ dependent, 1B (PPM1B), transcript variant 2, mRNA [NM_177968]	chr2:44461288-44461347	hs|2p21	Agilent_HUMAN_G3V2	NM_177968	chr2	44461288	44461347	+
LNCA_33_P3627001	0.041135	2.0848	mRNA	NM_144962	NM_144962	NM_144962	157310	Hs.491242	PEBP4	phosphatidylethanolamine-binding protein 4	ENST00000256404	THC2476024	GO:0005764	Homo sapiens phosphatidylethanolamine-binding protein 4 (PEBP4), mRNA [NM_144962]	chr8:22570843-22570784	hs|8p21.3	Agilent_HUMAN_G3V2	NM_144962	chr8	22570784	22570843	-
LNCA_21_P0012245	0.0366451	2.0831	mRNA	NR_015352	NR_015352	NR_015352	NA	NA	CECR7	cat eye syndrome chromosome region, candidate 7 (non-protein coding)	ENST00000441006	THC2573681	NA	Homo sapiens cat eye syndrome chromosome region, candidate 7 (non-protein coding) (CECR7), non-coding RNA [NR_015352]	chr22:17528257-17528316	hs|22q11.1	Agilent_HUMAN_G3V2	NR_015352	chr22	17528257	17528316	+
LNCA_33_P3394065	0.0192879	2.08154	mRNA	ENST00000376565	NA	NA	5305	NA	PIP4K2A	phosphatidylinositol-5-phosphate 4-kinase, type II, alpha	ENST00000376565	NA	GO:0016310|GO:0005737|GO:0005886|GO:0000166|GO:0005634|GO:0005575|GO:0005524|GO:0016740|GO:0016309|GO:0016308	phosphatidylinositol-5-phosphate 4-kinase, type II, alpha [Source:HGNC Symbol;Acc:8997] [ENST00000376565]	chr10:22856645-22856586	hs|10p12.2	Agilent_HUMAN_G3V2	ENST00000376565	chr10	22856586	22856645	-
LNCA_23_P28334	0.0445872	2.08078	mRNA	NM_003853	NM_003853	NM_003853	8807	Hs.158315	IL18RAP	interleukin 18 receptor accessory protein	ENST00000264260	THC2478417	GO:0005622|GO:0007165|GO:0006955|GO:0006954|GO:0016020|GO:0045087|GO:0004872|GO:0016021|GO:0007166|GO:0004888	Homo sapiens interleukin 18 receptor accessory protein (IL18RAP), mRNA [NM_003853]	chr2:103068885-103068944	hs|2q12.1	Agilent_HUMAN_G3V2	NM_003853	chr2	103068885	103068944	+
LNCA_21_P0000682	0.0237584	2.07376	mRNA	NR_037642	NR_037642	NR_037642	NA	Hs.496545	LOC100527964	uncharacterized LOC100527964	ENST00000415414	THC2498692	NA	Homo sapiens uncharacterized LOC100527964 (LOC100527964), non-coding RNA [NR_037642]	chr1:180238885-180238826	hs|1q25.2	Agilent_HUMAN_G3V2	NR_037642	chr1	180238826	180238885	-
LNCA_23_P316472	0.00505127	2.06913	mRNA	NM_144666	NM_144666	NM_144666	144132	Hs.720080	DNHD1	dynein heavy chain domain 1	ENST00000254579	THC2629994	GO:0030286|GO:0003777|GO:0007018	Homo sapiens dynein heavy chain domain 1 (DNHD1), transcript variant 1, mRNA [NM_144666]	chr11:6593108-6593167	hs|11p15.4	Agilent_HUMAN_G3V2	NM_144666	chr11	6593108	6593167	+
LNCA_33_P3214491	0.0418441	2.06885	mRNA	NM_001198832	NM_001198832	NM_001198832	9659	Hs.708687	PDE4DIP	phosphodiesterase 4D interacting protein	ENST00000313382	THC2491332	GO:0005515|GO:0005813|GO:0005737|GO:0005794|GO:0005634|GO:0030016|GO:0019899|GO:0005856|GO:0043623	Homo sapiens phosphodiesterase 4D interacting protein (PDE4DIP), transcript variant 8, mRNA [NM_001198832]	chr1:144879092-144877271	hs|1q21.1	Agilent_HUMAN_G3V2	NM_001198832	chr1	144877271	144879092	-
LNCA_33_P3241782	0.034275	2.06876	mRNA	NM_001617	NM_001617	NM_001617	119	Hs.188528	ADD2	adducin 2 (beta)	ENST00000403045	NP226721	GO:0030097|GO:0005516|GO:0030036|GO:0046982|GO:0005886|GO:0030507|GO:0003779|GO:0046872|GO:0042803|GO:0032092|GO:0051016|GO:0005737|GO:0051015|GO:0005198|GO:0008290|GO:0005856|GO:0051017|GO:0006811	Homo sapiens adducin 2 (beta) (ADD2), transcript variant 1, mRNA [NM_001617]	chr2:70901872-70901813	hs|2p13.3	Agilent_HUMAN_G3V2	NM_001617	chr2	70901813	70901872	-
LNCA_23_P125253	0.0144259	2.06443	mRNA	NM_001290	NM_001290	NM_001290	9079	Hs.714330	LDB2	LIM domain binding 2	ENST00000509803	THC2491720	GO:0003712|GO:0005667|GO:0044089|GO:0010669|GO:0030274|GO:0005634|GO:0019899|GO:0035019|GO:0001942	Homo sapiens LIM domain binding 2 (LDB2), transcript variant 1, mRNA [NM_001290]	chr4:16503156-16503144	hs|4p15.32	Agilent_HUMAN_G3V2	NM_001290	chr4	16503144	16503156	-
LNCA_24_P682579	0.0228812	2.0607	mRNA	NA	NA	NA	NA	NA	NA	NA	NA	NA	NA	NA	chr16:032447461-032447520	hs|16p11.2	Agilent_HUMAN_G3V2	NA	chr16	32447461	32447520	+
LNCA_23_P365614	0.0432348	2.06058	mRNA	NM_004557	NM_004557	NM_004557	4855	Hs.436100	NOTCH4	notch 4	ENST00000437843	THC2470696	GO:0005515|GO:0010467|GO:0007220|GO:0005886|GO:0030879|GO:0005634|GO:0009790|GO:0030154|GO:0005829|GO:0007219|GO:0004872|GO:0030097|GO:0001569|GO:0046982|GO:0009986|GO:0005796|GO:0001709|GO:0005509|GO:0005576|GO:0007275|GO:0016020|GO:0001886|GO:0005887|GO:0050793|GO:0005788|GO:0005654|GO:0045596|GO:0016021|GO:0045893|GO:0045602|GO:0001763	Homo sapiens notch 4 (NOTCH4), mRNA [NM_004557]	chr6:32162683-32162624	hs|6p21.32	Agilent_HUMAN_G3V2	NM_004557	chr6	32162624	32162683	-
LNCA_23_P326319	0.0485821	2.06027	mRNA	NM_033201	NM_033201	NM_033201	89927	Hs.401798	C16orf45	chromosome 16 open reading frame 45	ENST00000300006	THC2497958	NA	Homo sapiens chromosome 16 open reading frame 45 (C16orf45), transcript variant 1, mRNA [NM_033201]	chr16:15681608-15681667	hs|16p13.11	Agilent_HUMAN_G3V2	NM_033201	chr16	15681608	15681667	+
LNCA_33_P3327046	0.0479872	2.06	mRNA	DQ272581	NA	DQ272581	NA	Hs.380358	NA	NA	NA	THC2506072	NA	Homo sapiens alpha-actinin-like mRNA, partial sequence. [DQ272581]	chr6:44059949-44059890	hs|6p21.1	Agilent_HUMAN_G3V2	DQ272581	chr6	44059890	44059949	-
LNCA_33_P3216890	0.0185638	2.05707	mRNA	NM_018440	NM_018440	NM_018440	55824	Hs.266175	PAG1	phosphoprotein associated with glycosphingolipid microdomains 1	ENST00000523463	THC2512504	GO:0005515|GO:0050852|GO:0050863|GO:0005886|GO:0050868|GO:0005622|GO:0035556|GO:0007165|GO:0007173|GO:0005070|GO:0045121|GO:0016021|GO:0042169	Homo sapiens phosphoprotein associated with glycosphingolipid microdomains 1 (PAG1), mRNA [NM_018440]	chr8:81882726-81882667	hs|8q21.13	Agilent_HUMAN_G3V2	NM_018440	chr8	81882667	81882726	-
LNCA_32_P212802	0.0036107	2.05591	mRNA	NA	NA	NA	NA	NA	NA	NA	NA	NA	NA	NA	chr7:101995105-101995046	hs|7q22.1	Agilent_HUMAN_G3V2	NA	chr7	101995046	101995105	-
LNCA_21_P0011768	0.0101879	2.05254	mRNA	ENST00000360204	NA	BC067843	NA	Hs.658748	XLOC_l2_006648	NA	ENST00000360204	NP1133934	NA	GB	chr19:20976982-20977041	hs|19p12	Agilent_HUMAN_G3V2	ENST00000360204	chr19	20976982	20977041	+
LNCA_33_P3300747	0.00340932	2.0515	mRNA	NM_144650	NM_144650	NM_144650	137872	Hs.720023	ADHFE1	alcohol dehydrogenase, iron containing, 1	ENST00000396621	THC2620283	GO:0005739|GO:0047988|GO:0005759|GO:0006103|GO:0016491|GO:0046872|GO:0015993	Homo sapiens alcohol dehydrogenase, iron containing, 1 (ADHFE1), nuclear gene encoding mitochondrial protein, mRNA [NM_144650]	chr8:67359516-67359575	hs|8q13.1	Agilent_HUMAN_G3V2	NM_144650	chr8	67359516	67359575	+
LNCA_33_P3418668	0.00315786	2.05128	mRNA	NR_022011	NR_022011	NR_022011	347746	Hs.564847	PAR-SN	paternally expressed transcript PAR-SN	ENST00000557108	THC2537227	NA	Homo sapiens paternally expressed transcript PAR-SN (PAR-SN), non-coding RNA [NR_022011]	chr15:25228582-25228641	hs|15q11.2	Agilent_HUMAN_G3V2	NR_022011	chr15	25228582	25228641	+
LNCA_32_P149546	0.0121401	2.04969	mRNA	NM_014675	NM_014675	NM_014675	9696	Hs.309403	CROCC	ciliary rootlet coiled-coil, rootletin	ENST00000467715	NP1154880	GO:0005515|GO:0005813|GO:0005886|GO:0005814|GO:0015629|GO:0051297|GO:0005737|GO:0007049|GO:0008104|GO:0005198|GO:0035253|GO:0030030|GO:0019894	Homo sapiens ciliary rootlet coiled-coil, rootletin (CROCC), mRNA [NM_014675]	chr1:17264165-17264224	hs|1p36.13	Agilent_HUMAN_G3V2	NM_014675	chr1	17264165	17264224	+
LNCA_23_P394377	0.00649802	2.04907	mRNA	NM_199464	NM_199464	NM_199464	283518	Hs.660161	KCNRG	potassium channel regulator	ENST00000312942	THC2488376	GO:0016020|GO:0005783|GO:0008076|GO:0005249|GO:0006813|GO:0042802	Homo sapiens potassium channel regulator (KCNRG), transcript variant 2, mRNA [NM_199464]	chr13:50594618-50594677	hs|13q14.2	Agilent_HUMAN_G3V2	NM_199464	chr13	50594618	50594677	+
LNCA_33_P3226085	0.0342467	2.04867	mRNA	ENST00000390315	NA	AF063703	NA	Hs.449585	NA	NA	ENST00000390315	THC2464004	NA	immunoglobulin lambda variable 3-10 [Source:HGNC Symbol;Acc:5897] [ENST00000390315]	chr22:23154719-23154778	hs|22q11.22	Agilent_HUMAN_G3V2	ENST00000390315	chr22	23154719	23154778	+
LNCA_21_P0011370	0.00473569	2.04653	mRNA	NR_027409	NR_027409	NR_027409	NA	Hs.182982	GOLGA8A	golgin A8 family, member A	ENST00000360553	THC2569810	GO:0005794|GO:0016020|GO:0032580	Homo sapiens golgin A8 family, member A (GOLGA8A), transcript variant 2, non-coding RNA [NR_027409]	chr15:34692943-34691376	hs|15q14	Agilent_HUMAN_G3V2	NR_027409	chr15	34691376	34692943	-
LNCA_24_P294821	0.0335092	2.04566	mRNA	NM_003898	NM_003898	NM_003898	8871	Hs.434494	SYNJ2	synaptojanin 2	ENST00000367121	NP1201716	GO:0005515|GO:0005881|GO:0048471|GO:0017124|GO:0048312|GO:0003723|GO:0032587|GO:0004445|GO:0005626|GO:0030165|GO:0042578|GO:0004439|GO:0005737|GO:0031315|GO:0000166|GO:0016020|GO:0016787|GO:0007420|GO:0046855|GO:0046856|GO:0043679	Homo sapiens synaptojanin 2 (SYNJ2), transcript variant 1, mRNA [NM_003898]	chr6:158510878-158510937	hs|6q25.3	Agilent_HUMAN_G3V2	NM_003898	chr6	158510878	158510937	+
LNCA_23_P143247	0.0286551	2.04362	mRNA	NM_173485	NM_173485	NM_173485	128553	Hs.473117	TSHZ2	teashirt zinc finger homeobox 2	ENST00000329613	THC2472947	GO:0043565|GO:0005622|GO:0003700|GO:0008270|GO:0007275|GO:0005634|GO:0046872	Homo sapiens teashirt zinc finger homeobox 2 (TSHZ2), transcript variant 1, mRNA [NM_173485]	chr20:51872631-51872690	hs|20q13.2	Agilent_HUMAN_G3V2	NM_173485	chr20	51872631	51872690	+
LNCA_23_P156880	0.00418196	2.04317	mRNA	NM_006208	NM_006208	NM_006208	5167	Hs.527295	ENPP1	ectonucleotide pyrophosphatase/phosphodiesterase 1	ENST00000513998	THC2463531	GO:0005515|GO:0030308|GO:0050427|GO:0005886|GO:0045599|GO:0005158|GO:0004551|GO:0006767|GO:0009143|GO:0006796|GO:0006091|GO:0005615|GO:0046872|GO:0042803|GO:0031953|GO:0016323|GO:0006955|GO:0004528|GO:0030730|GO:0046325|GO:0005044|GO:0032869|GO:0030500|GO:0009986|GO:0046627|GO:0050656|GO:0003676|GO:0031214|GO:0005524|GO:0045719|GO:0030505|GO:0016787|GO:0047429|GO:0006766|GO:0030643|GO:0030247|GO:…	Homo sapiens ectonucleotide pyrophosphatase/phosphodiesterase 1 (ENPP1), mRNA [NM_006208]	chr6:132211871-132211930	hs|6q23.2	Agilent_HUMAN_G3V2	NM_006208	chr6	132211871	132211930	+
LNCA_24_P419087	0.0161251	2.04138	mRNA	NM_006576	NM_006576	NM_006576	10677	Hs.584854	AVIL	advillin	ENST00000548843	THC2653021	GO:0043005|GO:0030424|GO:0005737|GO:0060271|GO:0010976|GO:0007010|GO:0006950|GO:0003779|GO:0042995|GO:0015629|GO:0051693|GO:0007399	Homo sapiens advillin (AVIL), mRNA [NM_006576]	chr12:58200287-58200228	hs|12q14.1	Agilent_HUMAN_G3V2	NM_006576	chr12	58200228	58200287	-
LNCA_21_P0011780	0.0166611	2.04108	mRNA	ENST00000433232	NA	BQ049787	NA	Hs.125653	XLOC_l2_007034	NA	ENST00000433232	THC2731778	NA	AGENCOURT_6797022 NIH_MGC_85 Homo sapiens cDNA clone IMAGE:5787713 5', mRNA sequence [BQ049787]	chr19:37176899-37176840	hs|19q13.12	Agilent_HUMAN_G3V2	ENST00000433232	chr19	37176840	37176899	-
LNCA_24_P41801	0.0208766	2.03965	mRNA	NM_005577	NM_005577	NM_005577	4018	Hs.520120	LPA	lipoprotein, Lp(a)	ENST00000447678	THC2479369	GO:0006629|GO:0004252|GO:0004866|GO:0008015|GO:0034358|GO:0005576|GO:0006898|GO:0010951|GO:0006869|GO:0042157|GO:0006508|GO:0006810|GO:0008233|GO:0034185|GO:0001968|GO:0008201	Homo sapiens lipoprotein, Lp(a) (LPA), mRNA [NM_005577]	chr6:160966519-160963829	hs|6q25.3	Agilent_HUMAN_G3V2	NM_005577	chr6	160963829	160966519	-
LNCA_21_P0000784	0.00452163	2.03888	mRNA	NR_038396	NR_038396	NR_038396	NA	Hs.729453	LOC100506469	uncharacterized LOC100506469	NA	THC2507587	NA	Homo sapiens uncharacterized LOC100506469 (LOC100506469), non-coding RNA [NR_038396]	chr19:36032661-36032436	hs|19q13.12	Agilent_HUMAN_G3V2	NR_038396	chr19	36032436	36032661	-
LNCA_21_P0003154	0.0247624	2.03799	mRNA	NR_028303	NR_028303	NR_028303	NA	NA	LOC100302640	uncharacterized LOC100302640	NA	THC2541951	NA	Homo sapiens uncharacterized LOC100302640 (LOC100302640), non-coding RNA [NR_028303]	chr3:106828840-106828781	hs|3q13.12	Agilent_HUMAN_G3V2	NR_028303	chr3	106828781	106828840	-
LNCA_24_P291231	0.0127609	2.03526	mRNA	NM_016831	NM_016831	NM_016831	8863	Hs.162200	PER3	period homolog 3 (Drosophila)	ENST00000377532	THC2491400	GO:0006355|GO:0005737|GO:0007623|GO:0005634|GO:0004871|GO:0000122	Homo sapiens period homolog 3 (Drosophila) (PER3), mRNA [NM_016831]	chr1:7904641-7904700	hs|1p36.23	Agilent_HUMAN_G3V2	NM_016831	chr1	7904641	7904700	+
LNCA_33_P3256278	0.00754417	2.0346	mRNA	ENST00000425591	NA	BC101978	NA	Hs.694575	NA	NA	ENST00000425591	THC2478434	NA	Homo sapiens cDNA clone IMAGE:40021640. [BC101978]	chr7:153755133-153755074	hs|7q36.2	Agilent_HUMAN_G3V2	ENST00000425591	chr7	153755074	153755133	-
LNCA_33_P3225705	0.0244187	2.03304	mRNA	NM_001010895	NM_001010895	NM_001010895	375748	Hs.432364	C9orf102	chromosome 9 open reading frame 102	ENST00000437817	THC2501310	GO:0008026|GO:0005737|GO:0006281|GO:0016787|GO:0005815|GO:0000166|GO:0004386|GO:0005634|GO:0005856|GO:0005524|GO:0003677	Homo sapiens chromosome 9 open reading frame 102 (C9orf102), mRNA [NM_001010895]	chr9:98731043-98731102	hs|9q22.32	Agilent_HUMAN_G3V2	NM_001010895	chr9	98731043	98731102	+
LNCA_33_P3347343	0.01525	2.03293	mRNA	NM_001093729	NM_001093729	NM_001093729	79839	Hs.280781	CCDC102B	coiled-coil domain containing 102B	ENST00000358653	NP846983	NA	Homo sapiens coiled-coil domain containing 102B (CCDC102B), transcript variant 1, mRNA [NM_001093729]	chr18:66564598-66564657	hs|18q22.1	Agilent_HUMAN_G3V2	NM_001093729	chr18	66564598	66564657	+
LNCA_21_P0012549	0.0451274	2.02808	mRNA	ENST00000507238	NA	AK093477	NA	Hs.652423	XLOC_l2_010348	NA	ENST00000507238	THC2559329	NA	Q63ZV8_RAT (Q63ZV8) Ribosomal protein L32, partial (60%) [THC2559329]	chr3:129112110-129112051	hs|3q21.3	Agilent_HUMAN_G3V2	ENST00000507238	chr3	129112051	129112110	-
LNCA_24_P242132	0.0133418	2.02775	mRNA	NM_178564	NM_178564	NM_178564	340371	Hs.521926	NRBP2	nuclear receptor binding protein 2	ENST00000327830	THC2462678	GO:0043524|GO:0005737|GO:0004672|GO:0000166|GO:0030182|GO:0006468|GO:0005524|GO:0016772|GO:0007399	Homo sapiens nuclear receptor binding protein 2 (NRBP2), mRNA [NM_178564]	chr8:144916834-144916775	hs|8q24.3	Agilent_HUMAN_G3V2	NM_178564	chr8	144916775	144916834	-
LNCA_21_P0004980	0.00351986	2.02733	mRNA	ENST00000453935	NA	BQ012346	NA	Hs.596792	XLOC_005566	NA	ENST00000453935	THC2541663	NA	UI-1-BC1p-asn-c-06-0-UI.s1 NCI_CGAP_Pl3 Homo sapiens cDNA clone UI-1-BC1p-asn-c-06-0-UI 3', mRNA sequence [BQ012346]	chr5:180881769-180881828	hs|5q35.3	Agilent_HUMAN_G3V2	ENST00000453935	chr5	180881769	180881828	+
LNCA_21_P0013957	0.0176248	2.02234	mRNA	XM_003118523	XM_003118523	XM_003118523	NA	Hs.731323	LOC100131035	uncharacterized LOC100131035	NA	NA	NA	PREDICTED: Homo sapiens hypothetical protein LOC100131035 (LOC100131035), mRNA [XM_003118523]	chr3:136537492-136537433	hs|3q22.3	Agilent_HUMAN_G3V2	XM_003118523	chr3	136537433	136537492	-
LNCA_23_P325924	0.0218786	2.02128	mRNA	NM_001191033	NM_001191033	NM_001191033	150946	Hs.187912	FAM59B	family with sequence similarity 59, member B	ENST00000401533	THC2497461	NA	Homo sapiens family with sequence similarity 59, member B (FAM59B), transcript variant 2, mRNA [NM_001191033]	chr2:26412310-26412369	hs|2p23.3	Agilent_HUMAN_G3V2	NM_001191033	chr2	26412310	26412369	+
LNCA_32_P150632	0.0342773	2.0206	mRNA	ENST00000372234	NA	NA	311	NA	ANXA11	annexin A11	ENST00000372234	THC2532058	GO:0005515|GO:0006909|GO:0042470|GO:0008429|GO:0005509|GO:0042581|GO:0005819|GO:0042582|GO:0030496|GO:0005634|GO:0005635|GO:0007109|GO:0048155|GO:0045335|GO:0005544|GO:0051592|GO:0005737|GO:0007049|GO:0005654|GO:0005856|GO:0051301|GO:0048306	annexin A11 [Source:HGNC Symbol;Acc:535] [ENST00000372234]	chr10:81911255-81911196	hs|10q22.3	Agilent_HUMAN_G3V2	ENST00000372234	chr10	81911196	81911255	-
LNCA_33_P3370751	0.0210253	2.01616	mRNA	NM_022739	NM_022739	NM_022739	64750	Hs.730627	SMURF2	SMAD specific E3 ubiquitin protein ligase 2	ENST00000262435	THC2492069	GO:0005515|GO:0006511|GO:0004842|GO:0016567|GO:0016881|GO:0005886|GO:0016874|GO:0000151|GO:0046332|GO:0005634|GO:0030509|GO:0042802|GO:0005829|GO:0005622|GO:0005737|GO:0042787|GO:0045121|GO:0007179|GO:0030579|GO:0017015|GO:0045892|GO:0006464	Homo sapiens SMAD specific E3 ubiquitin protein ligase 2 (SMURF2), mRNA [NM_022739]	chr17:62540794-62540735	hs|17q23.3	Agilent_HUMAN_G3V2	NM_022739	chr17	62540735	62540794	-
LNCA_23_P372988	0.0473641	2.01455	mRNA	NM_001134316	NM_001134316	NM_001134316	163154	Hs.631838	PRR22	proline rich 22	ENST00000390672	THC2477494	NA	Homo sapiens proline rich 22 (PRR22), mRNA [NM_001134316]	chr19:5783222-5783163	hs|19p13.3	Agilent_HUMAN_G3V2	NM_001134316	chr19	5783163	5783222	-
LNCA_23_P32847	0.00900999	2.01449	mRNA	NM_001510	NM_001510	NM_001510	2895	Hs.480281	GRID2	glutamate receptor, ionotropic, delta 2	ENST00000282020	THC2491547	GO:0005215|GO:0030054|GO:0005886|GO:0060134|GO:0005234|GO:0060079|GO:0035249|GO:0045202|GO:0014069|GO:0007215|GO:0043523|GO:0005887|GO:0045211|GO:0030288|GO:0004970|GO:0008066|GO:0006810|GO:0004872|GO:0019717|GO:0005216|GO:0006811	Homo sapiens glutamate receptor, ionotropic, delta 2 (GRID2), mRNA [NM_001510]	chr4:94693252-94693311	hs|4q22.2	Agilent_HUMAN_G3V2	NM_001510	chr4	94693252	94693311	+
LNCA_21_P0013979	0.033769	2.01412	mRNA	XM_003119000	XM_003119000	XM_003119000	NA	Hs.658098	LOC100506073	NA	NA	THC2486295	NA	PREDICTED: Homo sapiens hypothetical protein LOC100506073 (LOC100506073), mRNA [XM_003119000]	chr5:132295265-132295206	hs|5q31.1	Agilent_HUMAN_G3V2	XM_003119000	chr5	132295206	132295265	-
LNCA_23_P156861	0.037874	2.01396	mRNA	NM_012419	NM_012419	NM_012419	26575	Hs.166313	RGS17	regulator of G-protein signaling 17	ENST00000206262	THC2475482	GO:0043547|GO:0005737|GO:0005886|GO:0005634|GO:0009968|GO:0004871|GO:0005096	Homo sapiens regulator of G-protein signaling 17 (RGS17), mRNA [NM_012419]	chr6:153332781-153332722	hs|6q25.2	Agilent_HUMAN_G3V2	NM_012419	chr6	153332722	153332781	-
LNCA_33_P3211864	0.0219049	2.01343	mRNA	NR_028407	NR_028407	NR_028407	100131755	Hs.729062	ARMCX4	armadillo repeat containing, X-linked 4	ENST00000354842	THC2624215	GO:0016020|GO:0016021	Homo sapiens armadillo repeat containing, X-linked 4 (ARMCX4), non-coding RNA [NR_028407]	chrX:100788387-100788446	hs|Xq22.1	Agilent_HUMAN_G3V2	NR_028407	chrX	100788387	100788446	+
LNCA_19_P00317272	0.00443746	2.01277	mRNA	NR_034128	NR_034128	NR_034128	NA	Hs.662205	LOC440900	uncharacterized LOC440900	ENST00000412690	THC2577212	NA	Homo sapiens uncharacterized LOC440900 (LOC440900), non-coding RNA [NR_034128]	chr2:114764605-114764664	hs|2q14.1	Agilent_HUMAN_G3V2	NR_034128	chr2	114764605	114764664	+
LNCA_23_P27636	0.0404129	2.01144	mRNA	NM_144566	NM_144566	NM_144566	90592	Hs.528486	ZNF700	zinc finger protein 700	ENST00000254321	THC2472582	GO:0005622|GO:0006355|GO:0008270|GO:0005634|GO:0003677|GO:0046872	Homo sapiens zinc finger protein 700 (ZNF700), mRNA [NM_144566]	chr19:12060977-12061036	hs|19p13.2	Agilent_HUMAN_G3V2	NM_144566	chr19	12060977	12061036	+
LNCA_33_P3209396	0.0311591	2.00996	mRNA	ENST00000498589	NA	NA	23759	NA	PPIL2	peptidylprolyl isomerase (cyclophilin)-like 2	ENST00000498589	THC2572335	GO:0000209|GO:0004842|GO:0007596|GO:0006457|GO:0005796|GO:0034450|GO:0005730|GO:0003755|GO:0000151|GO:0005634|GO:0050900|GO:0016853	peptidylprolyl isomerase (cyclophilin)-like 2 [Source:HGNC Symbol;Acc:9261] [ENST00000498589]	chr22:22015146-22015205	hs|22q11.21	Agilent_HUMAN_G3V2	ENST00000498589	chr22	22015146	22015205	+
LNCA_21_P0000086	0.00801176	2.0092	mRNA	NM_001172557	NM_001172557	NM_001172557	NA	NA	GOLGA3	golgin A3	ENST00000545875	NA	GO:0005215|GO:0005793|GO:0005737|GO:0005794|GO:0016020|GO:0000139|GO:0032580|GO:0005730|GO:0017119|GO:0006891|GO:0005634	Homo sapiens golgin A3 (GOLGA3), transcript variant 2, mRNA [NM_001172557]	chr12:133360513-133360454	hs|12q24.33	Agilent_HUMAN_G3V2	NM_001172557	chr12	133360454	133360513	-
LNCA_21_P0014929	0.00313151	2.00836	mRNA	NM_004327	NM_004327	NM_004327	NA	Hs.517461	BCR	breakpoint cluster region	ENST00000461808	THC2475970	GO:0043314|GO:0030036|GO:0005886|GO:0007264|GO:0035023|GO:0005829|GO:0005085|GO:0050766|GO:0000166|GO:0016301|GO:0051726|GO:0032496|GO:0050885|GO:0005089|GO:0030675|GO:0051056|GO:0030336|GO:0042472|GO:0005524|GO:0043547|GO:0007165|GO:0007420|GO:0004674|GO:0050728|GO:0006468|GO:0016740|GO:0005096	Homo sapiens breakpoint cluster region (BCR), transcript variant 1, mRNA [NM_004327]	chr22:23658741-23658797	hs|22q11.23	Agilent_HUMAN_G3V2	NM_004327	chr22	23658741	23658797	+
LNCA_21_P0013880	0.038202	2.00539	mRNA	ENST00000460561	NA	NA	NA	NA	XLOC_l2_015892	NA	ENST00000460561	THC2783530	NA	1718340A KALIG-1 gene. {Homo sapiens} (exp=-1; wgp=0; cg=0), partial (11%) [THC2783530]	chrY:15980985-15983548	hs|Yq11.221	Agilent_HUMAN_G3V2	ENST00000460561	chrY	15980985	15983548	+
LNCA_24_P118938	0.022948	2.00529	mRNA	NM_080616	NM_080616	NM_080616	140688	Hs.516978	C20orf112	chromosome 20 open reading frame 112	ENST00000359676	THC2464167	NA	Homo sapiens chromosome 20 open reading frame 112 (C20orf112), mRNA [NM_080616]	chr20:31031812-31031753	hs|20q11.21	Agilent_HUMAN_G3V2	NM_080616	chr20	31031753	31031812	-
LNCA_21_P0006401	0.0444656	2.00438	mRNA	NR_027131	NR_027131	NR_027131	NA	Hs.442518	NKAPP1	NFKB activating protein pseudogene 1	NA	THC2475365	NA	Homo sapiens NFKB activating protein pseudogene 1 (NKAPP1), non-coding RNA [NR_027131]	chrX:119370718-119370659	hs|Xq24	Agilent_HUMAN_G3V2	NR_027131	chrX	119370659	119370718	-
LNCA_21_P0007440	0.0439755	2.00428	mRNA	AL119424	NA	AL119424	NA	Hs.562353	XLOC_009185	NA	NA	THC2706090	NA	DKFZp761J181_r1 761 (synonym: hamy2) Homo sapiens cDNA clone DKFZp761J181 5', mRNA sequence [AL119424]	chr11:068041927-068041986	hs|11q13.2	Agilent_HUMAN_G3V2	AL119424	chr11	68041927	68041986	+
LNCA_23_P218784	0.00425312	2.00249	mRNA	NM_006386	NM_006386	NM_006386	10521	Hs.528305	DDX17	DEAD (Asp-Glu-Ala-Asp) box polypeptide 17	ENST00000432525	THC2671602	GO:0008026|GO:0006396|GO:0003724|GO:0016787|GO:0000166|GO:0003723|GO:0005634|GO:0005524|GO:0008186	Homo sapiens DEAD (Asp-Glu-Ala-Asp) box polypeptide 17 (DDX17), transcript variant 1, mRNA [NM_006386]	chr22:38889757-38888104	hs|22q13.1	Agilent_HUMAN_G3V2	NM_006386	chr22	38888104	38889757	-
LNCA_23_P431330	0.0294938	2.00155	mRNA	NM_175918	NM_175918	NM_175918	285464	Hs.26410	CRIPAK	cysteine-rich PAK1 inhibitor	ENST00000382944	THC2484070	GO:0005515|GO:0043627|GO:0006984|GO:0005737|GO:0051493|GO:0005886|GO:0005783|GO:0005634|GO:0006469	Homo sapiens cysteine-rich PAK1 inhibitor (CRIPAK), mRNA [NM_175918]	chr4:1389548-1389607	hs|4p16.3	Agilent_HUMAN_G3V2	NM_175918	chr4	1389548	1389607	+
LNCA_21_P0013190	0.00165287	2.00101	mRNA	NM_173812	NM_173812	NM_173812	NA	Hs.533644	DPY19L2	dpy-19-like 2 (C. elegans)	ENST00000306389	THC2462159	GO:0016020|GO:0007286|GO:0007275|GO:0016021|GO:0007283|GO:0030154	Homo sapiens dpy-19-like 2 (C. elegans) (DPY19L2), mRNA [NM_173812]	chr12:64041078-64038271	hs|12q14.2	Agilent_HUMAN_G3V2	NM_173812	chr12	64038271	64041078	-
